# Supplementary material for: Highly host-linked viromes in the built environment possess habitat-dependent diversity and functions for potential virus-host coevolution
Source: Research Square preprint supplement (doi:10.21203/rs.3.rs-2228576/v1), 2022-11-14
Supplement: Supplementary file 1 [file 988a6b47191c5fd3829e94f3.xlsx]

## Sheet: S1
Table S1. Sample information and metadata.
Sample	Number of clean forward reads	Built environment	Habitat	Indoor or outdoor	Location	Latitude	Longitude	Ground level	Type	Sample type	Surface material	Air temperature	Air humidity	Sampling date	Input station line	Select sampling place	Sampling place specific details	Select location	Sample accession
SL336587	2065031	Subways	Ticket Kiosk	NA	Lai King	22.3482	114.126	Aboveground (closed area)	Subway surface	Ticket Kiosk	Plastic	28.2	90	2017 June	NA	NA	NA	NA	SRS15156942
SL336592	2904652	Subways	Ticket Kiosk	NA	Tung Chung	22.289	113.941	Aboveground (mixed area)	Subway surface	Ticket Kiosk	Plastic	28.4	93	2017 June	NA	NA	NA	NA	SRS15156943
SL336593	2643191	Subways	Ticket Kiosk	NA	Olympic	22.3175	114.16	Aboveground (closed area)	Subway surface	Ticket Kiosk	Plastic	28.9	85	2017 June	NA	NA	NA	NA	SRS15156954
SL336601	1486457	Subways	Ticket Kiosk	NA	Tsing Yi	22.3582	114.107	Aboveground (closed area)	Subway surface	Ticket Kiosk	Plastic	29.2	82	2017 June	NA	NA	NA	NA	SRS15156965
SL336602	1158071	Subways	Ticket Kiosk	NA	Prince Edward	22.3244	114.168	Underground	Subway surface	Ticket Kiosk	Plastic	28.9	83	2017 June	NA	NA	NA	NA	SRS15156976
SL336603	2684995	Subways	Ticket Kiosk	NA	Kowloon	22.305	114.162	Underground	Subway surface	Ticket Kiosk	Plastic	28.8	84	2017 June	NA	NA	NA	NA	SRS15156987
SL336604	1653110	Subways	Ticket Kiosk	NA	Jordan	22.3048	114.172	Underground	Subway surface	Ticket Kiosk	Plastic	28.6	84	2017 June	NA	NA	NA	NA	SRS15156998
SL336605	886312	Subways	Ticket Kiosk	NA	AsiaWorld-Expo	22.3219	113.942	Aboveground (closed area)	Subway surface	Ticket Kiosk	Plastic	28	85	2017 June	NA	NA	NA	NA	SRS15157009
SL336606	1547318	Subways	Ticket Kiosk	NA	Sunny Bay	22.3316	114.029	Aboveground (mixed area)	Subway surface	Ticket Kiosk	Plastic	26.8	93	2017 June	NA	NA	NA	NA	SRS15157020
SL336607	1539608	Subways	Ticket Kiosk	NA	Hong Kong	22.2845	114.159	Underground	Subway surface	Ticket Kiosk	Plastic	27.9	84	2017 June	NA	NA	NA	NA	SRS15157022
SL336608	1646785	Subways	Ticket Kiosk	NA	Airport	22.3162	113.937	Aboveground (closed area)	Subway surface	Ticket Kiosk	Plastic	27.9	84	2017 June	NA	NA	NA	NA	SRS15156944
SL336609	2092779	Subways	Ticket Kiosk	NA	Disneyland Resort	22.315	114.045	Aboveground (open area)	Subway surface	Ticket Kiosk	Plastic	30.4	75	2017 June	NA	NA	NA	NA	SRS15156945
SL336610	2093960	Subways	Ticket Kiosk	NA	Tsim Sha Tsui	22.2971	114.172	Underground	Subway surface	Ticket Kiosk	Plastic	30.5	74	2017 June	NA	NA	NA	NA	SRS15156946
SL336611	1793371	Subways	Ticket Kiosk	NA	Nam Cheong	22.3264	114.153	Aboveground (closed area)	Subway surface	Ticket Kiosk	Plastic	30.6	74	2017 June	NA	NA	NA	NA	SRS15156947
SL336784	1925716	Subways	Ticket Kiosk	NA	Kowloon Bay	22.3234	114.214	Aboveground (closed area)	Subway surface	Ticket Kiosk	Plastic	30.7	69	2017 June	NA	NA	NA	NA	SRS15156948
SL336785	1950743	Subways	Ticket Kiosk	NA	Yau Tong	22.2977	114.237	Aboveground (closed area)	Subway surface	Ticket Kiosk	Plastic	30.1	76	2017 June	NA	NA	NA	NA	SRS15156949
SL336786	1007221	Subways	Ticket Kiosk	NA	Shek Kip Mei	22.3318	114.169	Underground	Subway surface	Ticket Kiosk	Plastic	29.7	79	2017 June	NA	NA	NA	NA	SRS15156950
SL336787	1140011	Subways	Ticket Kiosk	NA	Mongkok	22.3193	114.169	Underground	Subway surface	Ticket Kiosk	Plastic	31.3	69	2017 June	NA	NA	NA	NA	SRS15156951
SL336788	1596557	Subways	Ticket Kiosk	NA	Heng On	22.4175	114.226	Aboveground (mixed area)	Subway surface	Ticket Kiosk	Plastic	31.4	69	2017 June	NA	NA	NA	NA	SRS15156952
SL336789	1412290	Subways	Ticket Kiosk	NA	Lok Fu	22.3378	114.187	Underground	Subway surface	Ticket Kiosk	Plastic	31.2	68	2017 June	NA	NA	NA	NA	SRS15156953
SL336790	1386182	Subways	Ticket Kiosk	NA	Hang Hau	22.3154	114.264	Aboveground (closed area)	Subway surface	Ticket Kiosk	Plastic	31.6	69	2017 June	NA	NA	NA	NA	SRS15156955
SL336791	1467084	Subways	Ticket Kiosk	NA	City One	22.3831	114.204	Aboveground (mixed area)	Subway surface	Ticket Kiosk	Plastic	31.3	73	2017 June	NA	NA	NA	NA	SRS15156956
SL336792	1634297	Subways	Ticket Kiosk	NA	Wong Tai Sin	22.3416	114.194	Underground	Subway surface	Ticket Kiosk	Plastic	31.4	71	2017 June	NA	NA	NA	NA	SRS15156957
SL336793	493018	Subways	Ticket Kiosk	NA	Whampoa	22.3048	114.19	Underground	Subway surface	Ticket Kiosk	Plastic	31.8	68	2017 June	NA	NA	NA	NA	SRS15156958
SL336795	3224083	Subways	Ticket Kiosk	NA	Ngau Tau Kok	22.3154	114.219	Aboveground (closed area)	Subway surface	Ticket Kiosk	Plastic	32	70	2017 June	NA	NA	NA	NA	SRS15156959
SL336796	1450328	Subways	Ticket Kiosk	NA	Quarry Bay	22.2884	114.21	Aboveground (mixed area)	Subway surface	Ticket Kiosk	Plastic	31.6	71	2017 June	NA	NA	NA	NA	SRS15156960
SL336797	2141727	Subways	Ticket Kiosk	NA	Tseung Kwan O	22.3071	114.26	Aboveground (closed area)	Subway surface	Ticket Kiosk	Plastic	31.2	69	2017 June	NA	NA	NA	NA	SRS15156961
SL336800	1833782	Subways	Ticket Kiosk	NA	Kwun Tong	22.312	114.226	Aboveground (closed area)	Subway surface	Ticket Kiosk	Plastic	31.1	65	2017 June	NA	NA	NA	NA	SRS15156962
SL336802	2421708	Subways	Ticket Kiosk	NA	Diamond Hill	22.3398	114.202	Underground	Subway surface	Ticket Kiosk	Plastic	30.5	77	2017 June	NA	NA	NA	NA	SRS15156963
SL336803	1298784	Subways	Ticket Kiosk	NA	Ho Man Tin	22.3098	114.182	Underground	Subway surface	Ticket Kiosk	Plastic	30.9	75	2017 June	NA	NA	NA	NA	SRS15156964
SL336805	1991326	Subways	Ticket Kiosk	NA	North Point	22.2906	114.199	Underground	Subway surface	Ticket Kiosk	Plastic	30.8	74	2017 June	NA	NA	NA	NA	SRS15156966
SL336806	925519	Subways	Ticket Kiosk	NA	LOHAS Park	22.2951	114.269	Underground	Subway surface	Ticket Kiosk	Plastic	30.2	78	2017 June	NA	NA	NA	NA	SRS15156967
SL336807	1830456	Subways	Ticket Kiosk	NA	Lam Tin	22.3063	114.233	Aboveground (closed area)	Subway surface	Ticket Kiosk	Plastic	31.2	72	2017 June	NA	NA	NA	NA	SRS15156968
SL336808	2446935	Subways	Ticket Kiosk	NA	Yau Ma Tei	22.3126	114.171	Underground	Subway surface	Ticket Kiosk	Plastic	29.9	76	2017 June	NA	NA	NA	NA	SRS15156969
SL336809	1834262	Subways	Ticket Kiosk	NA	Wu Kai Sha	22.4291	114.244	Aboveground (mixed area)	Subway surface	Ticket Kiosk	Plastic	29.9	76	2017 June	NA	NA	NA	NA	SRS15156970
SL336810	1732868	Subways	Ticket Kiosk	NA	Ma On Shan	22.425	114.232	Aboveground (mixed area)	Subway surface	Ticket Kiosk	Plastic	30.3	74	2017 June	NA	NA	NA	NA	SRS15156971
SL336811	1887384	Subways	Ticket Kiosk	NA	Choi Hung	22.3349	114.21	Underground	Subway surface	Ticket Kiosk	Plastic	30.3	74	2017 June	NA	NA	NA	NA	SRS15156972
SL336812	702029	Subways	Ticket Kiosk	NA	Po Lam	22.3222	114.258	Aboveground (closed area)	Subway surface	Ticket Kiosk	Plastic	30.6	73	2017 June	NA	NA	NA	NA	SRS15156973
SL336813	1699392	Subways	Ticket Kiosk	NA	Tiu Keng Leng	22.3039	114.252	Aboveground (closed area)	Subway surface	Ticket Kiosk	Plastic	30.5	72	2017 June	NA	NA	NA	NA	SRS15156974
SL336814	1698467	Subways	Ticket Kiosk	NA	Hung Hom	22.303	114.182	Aboveground (closed area)	Subway surface	Ticket Kiosk	Plastic	30.6	71	2017 June	NA	NA	NA	NA	SRS15156975
SL336815	954019	Subways	Ticket Kiosk	NA	Tsuen Wan	22.3735	114.118	Aboveground (closed area)	Subway surface	Ticket Kiosk	Plastic	30.7	72	2017 June	NA	NA	NA	NA	SRS15156977
SL336816	1903603	Subways	Ticket Kiosk	NA	Cheung Sha Wan	22.3356	114.156	Underground	Subway surface	Ticket Kiosk	Plastic	31.5	72	2017 June	NA	NA	NA	NA	SRS15156978
SL336818	2722806	Subways	Ticket Kiosk	NA	Tai Wo Hau	22.3706	114.125	Underground	Subway surface	Ticket Kiosk	Plastic	31.8	71	2017 June	NA	NA	NA	NA	SRS15156979
SL336820	2075655	Subways	Ticket Kiosk	NA	Tsuen Wan West	22.3682	114.11	Underground	Subway surface	Ticket Kiosk	Plastic	31.1	70	2017 June	NA	NA	NA	NA	SRS15156980
SL336823	2608795	Subways	Ticket Kiosk	NA	Kam Sheung Road	22.4351	114.064	Aboveground (closed area)	Subway surface	Ticket Kiosk	Plastic	29.1	82	2017 June	NA	NA	NA	NA	SRS15156981
SL336824	2714114	Subways	Ticket Kiosk	NA	Kwai Hing	22.3628	114.131	Aboveground (closed area)	Subway surface	Ticket Kiosk	Plastic	29.1	81	2017 June	NA	NA	NA	NA	SRS15156982
SL336825	2591529	Subways	Ticket Kiosk	NA	Che Kung Temple	22.3747	114.186	Aboveground (mixed area)	Subway surface	Ticket Kiosk	Plastic	29.7	76	2017 June	NA	NA	NA	NA	SRS15156983
SL336828	1681329	Subways	Ticket Kiosk	NA	Austin	22.3042	114.167	Underground	Subway surface	Ticket Kiosk	Plastic	29.7	76	2017 June	NA	NA	NA	NA	SRS15156984
SL336829	2747821	Subways	Ticket Kiosk	NA	Sham Shui Po	22.33	114.16	Underground	Subway surface	Ticket Kiosk	Plastic	30.5	70	2017 June	NA	NA	NA	NA	SRS15156985
SL336830	1394226	Subways	Ticket Kiosk	NA	Tai Shui Hang	22.4082	114.223	Aboveground (closed area)	Subway surface	Ticket Kiosk	Plastic	30.8	68	2017 June	NA	NA	NA	NA	SRS15156986
SL336833	2351535	Subways	Ticket Kiosk	NA	Tuen Mun	22.3946	113.973	Aboveground (closed area)	Subway surface	Ticket Kiosk	Plastic	30.4	77	2017 June	NA	NA	NA	NA	SRS15156988
SL336836	1886673	Subways	Ticket Kiosk	NA	Mei Foo	22.3378	114.139	Aboveground (closed area)	Subway surface	Ticket Kiosk	Plastic	30.7	77	2017 June	NA	NA	NA	NA	SRS15156989
SL336837	1234804	Subways	Ticket Kiosk	NA	Yuen Long	22.446	114.035	Aboveground (closed area)	Subway surface	Ticket Kiosk	Plastic	30.7	75	2017 June	NA	NA	NA	NA	SRS15156990
SL336838	3154095	Subways	Ticket Kiosk	NA	Kwai Fong	22.3567	114.128	Aboveground (closed area)	Subway surface	Ticket Kiosk	Plastic	31	74	2017 June	NA	NA	NA	NA	SRS15156991
SL342522	226769	Subways	Ticket Kiosk	NA	University	22.4127	114.212	Aboveground (open area)	Subway surface	Ticket Kiosk	Plastic	30.3	76	2017 June	NA	NA	NA	NA	SRS15156992
SL342523	66973	Subways	Ticket Kiosk	NA	Tai Wo	22.4512	114.161	Aboveground (closed area)	Subway surface	Ticket Kiosk	Plastic	30.3	76	2017 June	NA	NA	NA	NA	SRS15156993
SL342524	2037853	Subways	Ticket Kiosk	NA	Sha Tin	22.3826	114.187	Aboveground (closed area)	Subway surface	Ticket Kiosk	Plastic	30.9	75	2017 June	NA	NA	NA	NA	SRS15156994
SL342525	1855714	Subways	Ticket Kiosk	NA	Fo Tan	22.3954	114.199	Aboveground (closed area)	Subway surface	Ticket Kiosk	Plastic	31.3	73	2017 June	NA	NA	NA	NA	SRS15156995
SL342526	1479962	Subways	Ticket Kiosk	NA	Tai Po Market	22.445	114.171	Aboveground (mixed area)	Subway surface	Ticket Kiosk	Plastic	30.9	73	2017 June	NA	NA	NA	NA	SRS15156996
SL342527	761643	Subways	Ticket Kiosk	NA	Tai Wai	22.3731	114.178	Aboveground (closed area)	Subway surface	Ticket Kiosk	Plastic	30.9	72	2017 June	NA	NA	NA	NA	SRS15156997
SL342528	2274025	Subways	Ticket Kiosk	NA	Mongkok East	22.322	114.172	Aboveground (closed area)	Subway surface	Ticket Kiosk	Plastic	30.5	74	2017 June	NA	NA	NA	NA	SRS15156999
SL342529	2085653	Subways	Ticket Kiosk	NA	Central	22.2817	114.158	Underground	Subway surface	Ticket Kiosk	Plastic	30.6	74	2017 June	NA	NA	NA	NA	SRS15157000
SL342530	2462858	Subways	Ticket Kiosk	NA	Admiralty	22.2786	114.166	Underground	Subway surface	Ticket Kiosk	Plastic	29.6	78	2017 June	NA	NA	NA	NA	SRS15157001
SL342531	1979831	Subways	Ticket Kiosk	NA	Kowloon Tong	22.3375	114.176	Underground	Subway surface	Ticket Kiosk	Plastic	29.3	83	2017 June	NA	NA	NA	NA	SRS15157002
SL342532	2570305	Subways	Ticket Kiosk	NA	Tin Hau	22.2823	114.192	Underground	Subway surface	Ticket Kiosk	Plastic	30.7	74	2017 June	NA	NA	NA	NA	SRS15157003
SL342533	3305403	Subways	Ticket Kiosk	NA	Fortress Hill	22.2874	114.193	Underground	Subway surface	Ticket Kiosk	Plastic	30.6	73	2017 June	NA	NA	NA	NA	SRS15157004
SL342534	1429243	Subways	Ticket Kiosk	NA	Sheung Wan	22.2864	114.152	Underground	Subway surface	Ticket Kiosk	Plastic	30.3	78	2017 June	NA	NA	NA	NA	SRS15157005
SL342535	2863387	Subways	Ticket Kiosk	NA	Shau Kei Wan	22.2782	114.228	Underground	Subway surface	Ticket Kiosk	Plastic	30	78	2017 June	NA	NA	NA	NA	SRS15157006
SL342536	2772764	Subways	Ticket Kiosk	NA	Sai Ying Pun	22.2849	114.143	Underground	Subway surface	Ticket Kiosk	Plastic	29.7	74	2017 June	NA	NA	NA	NA	SRS15157007
SL342537	2211830	Subways	Ticket Kiosk	NA	Sai Wan Ho	22.2815	114.222	Underground	Subway surface	Ticket Kiosk	Plastic	29.8	79	2017 June	NA	NA	NA	NA	SRS15157008
SL342538	2970753	Subways	Ticket Kiosk	NA	Wan Chai	22.2772	114.173	Underground	Subway surface	Ticket Kiosk	Plastic	31.2	69	2017 June	NA	NA	NA	NA	SRS15157010
SL342539	2110134	Subways	Ticket Kiosk	NA	HKU	22.284	114.135	Underground	Subway surface	Ticket Kiosk	Plastic	28.9	90	2017 June	NA	NA	NA	NA	SRS15157011
SL342540	3083247	Subways	Ticket Kiosk	NA	Causeway Bay	22.28	114.185	Underground	Subway surface	Ticket Kiosk	Plastic	28.8	86	2017 June	NA	NA	NA	NA	SRS15157012
SL342541	1560474	Subways	Ticket Kiosk	NA	Kennedy Town	22.2811	114.129	Underground	Subway surface	Ticket Kiosk	Plastic	29.1	88	2017 June	NA	NA	NA	NA	SRS15157013
SL342542	2075502	Subways	Ticket Kiosk	NA	Tai Koo	22.2837	114.216	Underground	Subway surface	Ticket Kiosk	Plastic	30	80	2017 June	NA	NA	NA	NA	SRS15157014
SL342543	1907298	Subways	Ticket Kiosk	NA	Lei Tung	22.2418	114.156	Aboveground (closed area)	Subway surface	Ticket Kiosk	Plastic	30.6	71	2017 June	NA	NA	NA	NA	SRS15157015
SL342544	1716131	Subways	Ticket Kiosk	NA	South Horizons	22.2426	114.149	Underground	Subway surface	Ticket Kiosk	Plastic	30.5	75	2017 June	NA	NA	NA	NA	SRS15157016
SL342545	1622973	Subways	Ticket Kiosk	NA	Wong Chuk Hang	22.2477	114.166	Aboveground (closed area)	Subway surface	Ticket Kiosk	Plastic	30.2	76	2017 June	NA	NA	NA	NA	SRS15157017
SL342546	1811845	Subways	Ticket Kiosk	NA	Ocean Park	22.2485	114.174	Aboveground (closed area)	Subway surface	Ticket Kiosk	Plastic	30.4	75	2017 June	NA	NA	NA	NA	SRS15157018
SL342553	466236	Subways	Ticket Kiosk	NA	Heng Fa Chuen	22.2764	114.24	Aboveground (closed area)	Subway surface	Ticket Kiosk	Plastic	29.7	79	2017 June	NA	NA	NA	NA	SRS15157019
SL342554	2143100	Subways	Ticket Kiosk	NA	Chai Wan	22.2645	114.237	Aboveground (closed area)	Subway surface	Ticket Kiosk	Plastic	28.8	85	2017 June	NA	NA	NA	NA	SRS15157021
SL336563	3360364	Residences	Skin	NA	NA	22.3959	114.2	Aboveground (closed area)	Skin	Right palm	Skin	28.4	89	2017 July	Other	Right palm	residence 3 right palm day 10 day	Residence 3	SRS7581572
SL336564	2636014	Residences	Skin	NA	NA	22.3952	114.2	Aboveground (closed area)	Skin	Left palm	Skin	28.4	89	2017 July	Other	Left palm	residence 3 left palm day 10 day	Residence 3	SRS7581573
SL336568	5617483	Residences	Skin	NA	NA	22.396	114.199	Aboveground (closed area)	Skin	Right palm	Skin	29.3	74	2017 July	Other	Right palm	residence 3 right palm day 9 day	Residence 3	SRS7581931
SL336570	4912623	Residences	Skin	NA	NA	22.3953	114.2	Aboveground (closed area)	Skin	Left palm	Skin	29.3	74	2017 July	Other	Left palm	residence 3 left palm day 9 day	Residence 3	SRS7581955
SL336582	2306994	Residences	Skin	NA	NA	22.3955	114.199	Aboveground (closed area)	Skin	Right palm	Skin	29	82	2017 July	Other	Right palm	residence 3right palm day 10 night	Residence 3	SRS7581673
SL336583	2869434	Residences	Skin	NA	NA	22.3956	114.2	Aboveground (closed area)	Skin	Right palm	Skin	28.9	85	2017 July	Other	Right palm	residence 3 right palm day 9 night	Residence 3	SRS7581685
SL336584	1600099	Residences	Skin	NA	NA	22.3951	114.199	Aboveground (closed area)	Skin	Left palm	Skin	28.9	85	2017 July	Other	Left palm	residence 3 left palm day 9 night	Residence 3	SRS7581696
SL336585	1385246	Residences	Skin	NA	NA	22.3955	114.2	Aboveground (closed area)	Skin	Left palm	Skin	29	82	2017 July	Other	Left palm	residence 3 left palm day 10 night	Residence 3	SRS7581707
SL336588	2088816	Residences	Skin	NA	NA	22.2757	114.169	Aboveground (closed area)	Skin	Left palm	Skin	27.9	89	2017 July	Other	Left palm	Residence 1 left palm day 3 night	Residence 1	SRS7581729
SL336591	1561913	Residences	Skin	NA	NA	22.2755	114.169	Aboveground (closed area)	Skin	Right palm	Skin	28.2	82	2017 July	Other	Right palm	residence 1 right palm day 4 day	Residence 1	SRS7581751
SL336600	2185153	Residences	Skin	NA	NA	22.2755	114.169	Aboveground (closed area)	Skin	Left palm	Skin	28.2	82	2017 July	Other	Left palm	residence 1 left palm day 4 day	Residence 1	SRS7581806
SL336614	2039807	Residences	Skin	NA	NA	22.2756	114.169	Aboveground (closed area)	Skin	Left palm	Skin	27.5	83	2017 July	Other	Left palm	residence 1 left palm day 6 night	Residence 1	SRS7581839
SL336615	1766167	Residences	Skin	NA	NA	22.2757	114.169	Aboveground (closed area)	Skin	Right palm	Skin	28.7	80	2017 July	Other	Right palm	residence 1 right palm day 7 night	Residence 1	SRS7581851
SL336620	4484232	Residences	Skin	NA	NA	22.2757	114.169	Aboveground (closed area)	Skin	Left palm	Skin	28.1	88	2017 July	Other	Left palm	residence 1 left palm day 5 night	Residence 1	SRS7581884
SL336622	2678897	Residences	Skin	NA	NA	22.2755	114.169	Aboveground (closed area)	Skin	Left palm	Skin	28.7	80	2017 July	Other	Left palm	residence 1 left palm day 7 night	Residence 1	SRS7581909
SL336627	3351974	Residences	Skin	NA	NA	22.2756	114.169	Aboveground (closed area)	Skin	Right palm	Skin	28.1	88	2017 July	Other	Right palm	residence 1 right palm day 5 night	Residence 1	SRS7581927
SL336634	2923616	Residences	Skin	NA	NA	22.2757	114.169	Aboveground (closed area)	Skin	Left palm	Skin	30	78	2017 July	Other	Left palm	residence 1 left palm day 6 day	Residence 1	SRS7581932
SL336641	934511	Residences	Skin	NA	NA	22.2757	114.169	Aboveground (closed area)	Skin	Right palm	Skin	30	78	2017 July	Other	Right palm	residence 1 right palm day 6 day	Residence 1	SRS7581937
SL336644	2120011	Residences	Skin	NA	NA	22.2755	114.169	Aboveground (closed area)	Skin	Left palm	Skin	29	80	2017 July	Other	Left palm	residence 1 left palm day 9 day	Residence 1	SRS7581941
SL336650	2871068	Residences	Skin	NA	NA	22.2754	114.169	Aboveground (closed area)	Skin	Right palm	Skin	29	80	2017 July	Other	Right palm	residence 1 right palm day 9 day	Residence 1	SRS7581947
SL336655	1014304	Residences	Skin	NA	NA	22.2756	114.169	Aboveground (closed area)	Skin	Left palm	Skin	28.4	84	2017 July	Other	Left palm	residence 1 left palm day 8 day	Residence 1	SRS7581952
SL336657	305609	Residences	Skin	NA	NA	22.2756	114.169	Aboveground (closed area)	Skin	Right palm	Skin	29.2	82	2017 July	Other	Right palm	residence 1 right palm day 10 day	Residence 1	SRS7581954
SL336658	989397	Residences	Skin	NA	NA	22.2756	114.169	Aboveground (closed area)	Skin	Left palm	Skin	26.9	92	2017 July	Other	Left palm	residence left palm day 5 day	Residence 1	SRS7581956
SL336660	1237596	Residences	Skin	NA	NA	22.2755	114.169	Aboveground (closed area)	Skin	Left palm	Skin	28.1	80	2017 July	Other	Left palm	residence 1 left palm day 7 day	Residence 1	SRS7581958
SL336661	1296108	Residences	Skin	NA	NA	22.2757	114.169	Aboveground (closed area)	Skin	Right palm	Skin	28.4	84	2017 July	Other	Right palm	residence 1 right palm day 8 day	Residence 1	SRS7581959
SL336663	599065	Residences	Skin	NA	NA	22.2757	114.169	Aboveground (closed area)	Skin	Left palm	Skin	29.2	82	2017 July	Other	Left palm	residence 1 left palm day 10 day	Residence 1	SRS7581961
SL336666	1638571	Residences	Skin	NA	NA	22.2755	114.169	Aboveground (closed area)	Skin	Right palm	Skin	28.1	80	2017 July	Other	Right palm	residence 1 right palm day 7 day	Residence 1	SRS7581964
SL336670	1291400	Residences	Skin	NA	NA	22.2756	114.169	Aboveground (closed area)	Skin	Right palm	Skin	26.9	92	2017 July	Other	Right palm	residence right palm day 5 day	Residence 1	SRS7581969
SL336679	2111116	Residences	Skin	NA	NA	22.2757	114.169	Aboveground (closed area)	Skin	Left palm	Skin	29.9	70	2017 July	Other	Left palm	residence 1 left palm day 8 night	Residence 1	SRS7581979
SL336681	1624078	Residences	Skin	NA	NA	22.2757	114.169	Aboveground (closed area)	Skin	Right palm	Skin	29	80	2017 July	Other	Right palm	residence 1 right palm day 9 night	Residence 1	SRS7581981
SL336683	844556	Residences	Skin	NA	NA	22.2756	114.169	Aboveground (closed area)	Skin	Right palm	Skin	27.5	83	2017 July	Other	Right palm	residence 1 right palm day 6 night	Residence 1	SRS7581983
SL336685	1407402	Residences	Skin	NA	NA	22.2757	114.169	Aboveground (closed area)	Skin	Right palm	Skin	29.9	70	2017 July	Other	Right palm	residence 1 right palm day 8 night	Residence 1	SRS7581984
SL336687	2170657	Residences	Skin	NA	NA	22.2755	114.169	Aboveground (closed area)	Skin	Left palm	Skin	29	80	2017 July	Other	Left palm	residence 1 left palm day 9 night	Residence 1	SRS7581575
SL336688	2450101	Residences	Skin	NA	NA	22.396	114.2	Aboveground (closed area)	Skin	Left palm	Skin	28	90	2017 July	Other	Left palm	Residence 3 left palm day 1 day	Residence 3	SRS7581576
SL336689	3623671	Residences	Skin	NA	NA	22.3951	114.198	Aboveground (closed area)	Skin	Left palm	Skin	27	85	2017 July	Other	Left palm	residence 3 left palm day 2 day	Residence 3	SRS7581577
SL336690	4313726	Residences	Skin	NA	NA	22.3949	114.199	Aboveground (closed area)	Skin	Right palm	Skin	28	87	2017 July	Other	Right palm	residence 3 right palm day 3 day	Residence 3	SRS7581578
SL336691	4125034	Residences	Skin	NA	NA	22.3961	114.199	Aboveground (closed area)	Skin	Right palm	Skin	29.7	78	2017 July	Other	Right palm	residence 3 right palm day 6 day	Residence 3	SRS7581579
SL336692	3797811	Residences	Skin	NA	NA	22.3952	114.2	Aboveground (closed area)	Skin	Right palm	Skin	28.4	80	2017 July	Other	Right palm	residence 3 right palm day 4 day	Residence 3	SRS7581580
SL336693	2631505	Residences	Skin	NA	NA	22.3953	114.2	Aboveground (closed area)	Skin	Right palm	Skin	26.7	90	2017 July	Other	Right palm	residence 3 right palm day 5 day	Residence 3	SRS7581581
SL336694	4127548	Residences	Skin	NA	NA	22.3955	114.2	Aboveground (closed area)	Skin	Right palm	Skin	29.7	74	2017 July	Other	Right palm	residence 3 left palm day 7 day	Residence 3	SRS7581582
SL336695	2858474	Residences	Skin	NA	NA	22.3958	114.2	Aboveground (closed area)	Skin	Right palm	Skin	28.3	86	2017 July	Other	Right palm	residence 3 right palm day 8 day	Residence 3	SRS7581583
SL336696	2287405	Residences	Skin	NA	NA	22.3957	114.2	Aboveground (closed area)	Skin	Right palm	Skin	28	90	2017 July	Other	Right palm	residence 3 right palm day 1 day	Residence 3	SRS7581584
SL336697	4530538	Residences	Skin	NA	NA	22.3949	114.2	Aboveground (closed area)	Skin	Right palm	Skin	27	85	2017 July	Other	Right palm	residence 3 right palm day 2 day	Residence 3	SRS7581586
SL336698	2610412	Residences	Skin	NA	NA	22.3955	114.2	Aboveground (closed area)	Skin	Left palm	Skin	28	87	2017 July	Other	Left palm	residence 3 left palm day 3 day	Residence 3	SRS7581587
SL336699	6031516	Residences	Skin	NA	NA	22.3954	114.199	Aboveground (closed area)	Skin	Left palm	Skin	28.4	80	2017 July	Other	Left palm	residence 3 left palm day 4 day	Residence 3	SRS7581588
SL336700	1980495	Residences	Skin	NA	NA	22.3952	114.199	Aboveground (closed area)	Skin	Left palm	Skin	26.7	90	2017 July	Other	Left palm	residence 3 left palm day 5 day	Residence 3	SRS7581589
SL336701	2930437	Residences	Skin	NA	NA	22.3954	114.199	Aboveground (closed area)	Skin	Left palm	Skin	29.7	78	2017 July	Other	Left palm	residence 3 left palm day 6 day	Residence 3	SRS7581590
SL336702	3818606	Residences	Skin	NA	NA	22.3952	114.199	Aboveground (closed area)	Skin	Left palm	Skin	29.7	74	2017 July	Other	Left palm	residence 3 left palm day 7 day	Residence 3	SRS7581591
SL336703	4375438	Residences	Skin	NA	NA	22.3952	114.2	Aboveground (closed area)	Skin	Left palm	Skin	28.3	86	2017 July	Other	Left palm	residence 3 left palm day 8 day	Residence 3	SRS7581592
SL336737	2648440	Residences	Skin	NA	NA	22.3951	114.199	Aboveground (closed area)	Skin	Right palm	Skin	28.8	83	2017 July	Other	Right palm	residence 3 right palm day 2 night	Residence 3	SRS7581630
SL336743	4078634	Residences	Skin	NA	NA	22.3953	114.199	Aboveground (closed area)	Skin	Right palm	Skin	28.7	83	2017 July	Other	Right palm	residence 3 right palm day 8 night	Residence 3	SRS7581635
SL336745	1929712	Residences	Skin	NA	NA	22.3955	114.2	Aboveground (closed area)	Skin	Left palm	Skin	28.8	83	2017 July	Other	Left palm	residence 3 left palm day 2 night	Residence 3	SRS7581637
SL336751	2321166	Residences	Skin	NA	NA	22.3955	114.199	Aboveground (closed area)	Skin	Left palm	Skin	28.7	83	2017 July	Other	Left palm	residence 3 left palm day 8 night	Residence 3	SRS7581644
SL336768	2618444	Residences	Skin	NA	NA	22.3955	114.2	Aboveground (closed area)	Skin	Left palm	Skin	28	95	2017 July	Other	Left palm	residence 3 left palm day 1 night	Residence 3	SRS7581663
SL336770	3292824	Residences	Skin	NA	NA	22.3951	114.199	Aboveground (closed area)	Skin	Left palm	Skin	28.2	85	2017 July	Other	Left palm	residence 3 left palm day 3 night	Residence 3	SRS7581665
SL336771	3308921	Residences	Skin	NA	NA	22.3956	114.2	Aboveground (closed area)	Skin	Left palm	Skin	26.9	93	2017 July	Other	Left palm	residence 3 left palm day 4 night	Residence 3	SRS7581666
SL336772	3309914	Residences	Skin	NA	NA	22.3954	114.199	Aboveground (closed area)	Skin	Right palm	Skin	27.3	93	2017 July	Other	Right palm	residence 3 right palm day 5 night	Residence 3	SRS7581667
SL336773	3078729	Residences	Skin	NA	NA	22.3951	114.2	Aboveground (closed area)	Skin	Right palm	Skin	27.1	91	2017 July	Other	Right palm	residence 3 right palm day 6 night	Residence 3	SRS7581668
SL336774	2552992	Residences	Skin	NA	NA	22.396	114.2	Aboveground (closed area)	Skin	Right palm	Skin	28.3	82	2017 July	Other	Right palm	residence 3 right palm day 7 night	Residence 3	SRS7581669
SL336776	2613371	Residences	Skin	NA	NA	22.3954	114.2	Aboveground (closed area)	Skin	Right palm	Skin	28	95	2017 July	Other	Right palm	residence 3 right palm day 1 night	Residence 3	SRS7581671
SL336778	3127624	Residences	Skin	NA	NA	22.3951	114.199	Aboveground (closed area)	Skin	Right palm	Skin	28.2	85	2017 July	Other	Right palm	residence 3 right palm day 3 night	Residence 3	SRS7581674
SL336779	2760219	Residences	Skin	NA	NA	22.3953	114.199	Aboveground (closed area)	Skin	Right palm	Skin	26.9	93	2017 July	Other	Right palm	residence 3 right palm day 4 night	Residence 3	SRS7581675
SL336781	2601360	Residences	Skin	NA	NA	22.3953	114.2	Aboveground (closed area)	Skin	Left palm	Skin	27.1	91	2017 July	Other	Left palm	residence 3 left palm day 6 night	Residence 3	SRS7581677
SL336782	2726634	Residences	Skin	NA	NA	22.3955	114.2	Aboveground (closed area)	Skin	Left palm	Skin	28.3	82	2017 July	Other	Left palm	residence 3 left palm day 7 night	Residence 3	SRS7581678
SL336794	1427261	Residences	Skin	NA	NA	22.2756	114.169	Aboveground (closed area)	Skin	Skin	Skin	26.1	93	2017 July	Other	Left palm	Left Palm Day 1 Day	Residence 1	SRS7581680
SL336798	1773325	Residences	Skin	NA	NA	22.2755	114.169	Aboveground (closed area)	Skin	Right palm	Skin	26.1	93	2017 July	Other	Right palm	Residence 1 Right Palm Day 1 Day	Residence 1	SRS7581681
SL336821	1696162	Residences	Skin	NA	NA	22.2756	114.169	Aboveground (closed area)	Skin	Right palm	Skin	26.2	91	2017 July	Other	Right palm	Residence 1 Right Palm Day 1 Night	Residence 1	SRS7581689
SL336826	2880493	Residences	Skin	NA	NA	22.2757	114.169	Aboveground (closed area)	Skin	Left palm	Skin	26.2	91	2017 July	Other	Left palm	Residence 1 Left Palm Day 1 Night	Residence 1	SRS7581691
SL336827	2398621	Residences	Skin	NA	NA	22.2757	114.169	Aboveground (closed area)	Skin	Right palm	Skin	26.8	92	2017 July	Other	Right palm	residence 1 right palm day 2 night	Residence 1	SRS7581692
SL336832	2137197	Residences	Skin	NA	NA	22.2755	114.169	Aboveground (closed area)	Skin	Left palm	Skin	26.8	92	2017 July	Other	Left palm	Residence 1 left palm day 2 night	Residence 1	SRS7581694
SL342547	2405195	Residences	Skin	NA	NA	22.2756	114.169	Aboveground (closed area)	Skin	Left palm	Skin	27.1	95	2017 July	Other	Left palm	residence 1 left palm day 3 day	Residence 1	SRS7581701
SL342548	2582195	Residences	Skin	NA	NA	22.2755	114.169	Aboveground (closed area)	Skin	Right palm	Skin	27.1	95	2017 July	Other	Right palm	residence 1 right palm day 3 day	Residence 1	SRS7581702
SL345904	3771992	Residences	Skin	NA	NA	22.3701	114.185	Aboveground (closed area)	Skin	Right palm	Skin	NA	NA	2017 July	Other	NA	residence 2 right palm day 2 day	Residence 2	SRS7581710
SL345906	2208418	Residences	Skin	NA	NA	22.3709	114.185	Aboveground (closed area)	Skin	Left palm	Skin	NA	NA	2017 July	Other	NA	res 2 left palm day 4 day	Residence 2	SRS7581712
SL345907	2495248	Residences	Skin	NA	NA	22.3706	114.185	Aboveground (closed area)	Skin	Right palm	Skin	NA	NA	2017 July	Other	NA	res 2 right palm day 5 day	Residence 2	SRS7581713
SL345909	1961030	Residences	Skin	NA	NA	22.3716	114.186	Aboveground (closed area)	Skin	Right palm	Skin	NA	NA	2017 July	Other	NA	res 2 right palm day 7 day	Residence 2	SRS7581715
SL345911	2300452	Residences	Skin	NA	NA	22.3711	114.185	Aboveground (closed area)	Skin	Left palm	Skin	28	83	2017 July	Other	NA	residence 2 left palm day 1 day	Residence 2	SRS7581717
SL345915	2669993	Residences	Skin	NA	NA	22.3712	114.185	Aboveground (closed area)	Skin	Left palm	Skin	NA	NA	2017 July	Other	NA	res 2 left palm day 5 day	Residence 2	SRS7581722
SL345916	2850623	Residences	Skin	NA	NA	22.371	114.185	Aboveground (closed area)	Skin	Right palm	Skin	NA	NA	2017 July	Other	NA	res 2 right palm day 6 day	Residence 2	SRS7581723
SL345919	5060447	Residences	Skin	NA	NA	22.3712	114.186	Aboveground (closed area)	Skin	Right palm	Skin	28	83	2017 July	Other	NA	residence 2 right palm day 1 day	Residence 2	SRS7581726
SL345921	5364190	Residences	Skin	NA	NA	22.3709	114.185	Aboveground (closed area)	Skin	Right palm	Skin	NA	NA	2017 July	Other	NA	residence 2 right palm day 3 day	Residence 2	SRS7581728
SL345929	2136160	Residences	Skin	NA	NA	22.3711	114.185	Aboveground (closed area)	Skin	Left palm	Skin	NA	NA	2017 July	Other	NA	residence 2 left palm day 3 day	Residence 2	SRS7581737
SL345933	1196947	Residences	Skin	NA	NA	22.372	114.186	Aboveground (closed area)	Skin	Left palm	Skin	NA	NA	2017 July	Other	NA	res 2 left palm day 7 day	Residence 2	SRS7581742
SL345934	1235423	Residences	Skin	NA	NA	22.3716	114.185	Aboveground (closed area)	Skin	Left palm	Skin	NA	NA	2017 July	Other	NA	res 2 left palm day 8 day	Residence 2	SRS7581743
SL345936	2705052	Residences	Skin	NA	NA	22.3705	114.185	Aboveground (closed area)	Skin	Left palm	Skin	NA	NA	2017 July	Other	NA	residence 2 left palm day 2 day	Residence 2	SRS7581745
SL345940	1433289	Residences	Skin	NA	NA	22.3709	114.185	Aboveground (closed area)	Skin	Left palm	Skin	NA	NA	2017 July	Other	NA	res 2 left palm day 6 day	Residence 2	SRS7581749
SL345946	6001456	Residences	Skin	NA	NA	22.3711	114.185	Aboveground (closed area)	Skin	Right palm	Skin	NA	NA	2017 July	Other	NA	res 2 right palm day 4 day	Residence 2	SRS7581756
SL345950	3564535	Residences	Skin	NA	NA	22.3716	114.185	Aboveground (mixed area)	Skin	Right palm	Skin	NA	NA	2017 July	Other	NA	res 2 right palm day 8 day	Residence 2	SRS7581760
SL345954	1949997	Residences	Skin	NA	NA	22.3708	114.185	Aboveground (closed area)	Skin	Left palm	Skin	NA	NA	2017 July	Other	NA	res 2 left palm day 4 night	Residence 2	SRS7581764
SL345955	2732109	Residences	Skin	NA	NA	22.3708	114.185	Aboveground (closed area)	Skin	Right palm	Skin	NA	NA	2017 July	Other	NA	res 2 right palm day 5 night	Residence 2	SRS7581765
SL345957	1570036	Residences	Skin	NA	NA	22.3717	114.186	Aboveground (closed area)	Skin	Left palm	Skin	NA	NA	2017 July	Other	NA	res 2 left palm day 7 night	Residence 2	SRS7581768
SL345958	1436139	Residences	Skin	NA	NA	22.3716	114.186	Aboveground (closed area)	Skin	Left palm	Skin	NA	NA	2017 July	Other	NA	res 2 left palm day 8 night	Residence 2	SRS7581769
SL345959	1810548	Residences	Skin	NA	NA	22.3716	114.186	Aboveground (closed area)	Skin	Right palm	Skin	NA	NA	2017 July	Other	NA	residence 2 right palm day 1 night	Residence 2	SRS7581770
SL345962	952979	Residences	Skin	NA	NA	22.3716	114.185	Aboveground (closed area)	Skin	Left palm	Skin	NA	NA	2017 July	Other	NA	res 2 left palm day 3 night	Residence 2	SRS7581774
SL345964	1843303	Residences	Skin	NA	NA	22.3716	114.185	Aboveground (closed area)	Skin	Right palm	Skin	NA	NA	2017 July	Other	NA	res 6 right palm day 6 night	Residence 2	SRS7581776
SL345970	1411419	Residences	Skin	NA	NA	22.3705	114.185	Aboveground (closed area)	Skin	Right palm	Skin	NA	NA	2017 July	Other	NA	res 2 right palm day 4 night	Residence 2	SRS7581782
SL345971	619062	Residences	Skin	NA	NA	22.3705	114.185	Aboveground (closed area)	Skin	Left palm	Skin	NA	NA	2017 July	Other	NA	res 2 left palm day 5 night	Residence 2	SRS7581783
SL345975	1803503	Residences	Skin	NA	NA	22.3705	114.186	Aboveground (closed area)	Skin	Left palm	Skin	NA	NA	2017 July	Other	NA	residence 2 left palm day 1 night	Residence 2	SRS7581788
SL345976	1719957	Residences	Skin	NA	NA	22.3709	114.185	Aboveground (closed area)	Skin	Left palm	Skin	NA	NA	2017 July	Other	NA	residence 2 left palm day 2 night	Residence 2	SRS7581789
SL345977	2476357	Residences	Skin	NA	NA	22.3709	114.185	Aboveground (closed area)	Skin	Right palm	Skin	NA	NA	2017 July	Other	NA	res 2 right palm day 3 night	Residence 2	SRS7581790
SL345981	2962475	Residences	Skin	NA	NA	22.3716	114.186	Aboveground (closed area)	Skin	Right palm	Skin	NA	NA	2017 July	Other	NA	res 2 right palm day 7 night	Residence 2	SRS7581794
SL345982	3300260	Residences	Skin	NA	NA	22.3719	114.186	Aboveground (closed area)	Skin	Right palm	Skin	NA	NA	2017 July	Other	NA	res 2 right palm day 8 night	Residence 2	SRS7581797
SL345984	1836023	Residences	Skin	NA	NA	22.3712	114.185	Aboveground (closed area)	Skin	Right palm	Skin	NA	NA	2017 July	Other	NA	residence 2 right palm day 2 night	Residence 2	SRS7581799
SL345996	1285805	Residences	Skin	NA	NA	22.3712	114.185	Aboveground (closed area)	Skin	Left palm	Skin	NA	NA	2017 July	Other	NA	res 2 left palm day 6 night	Residence 2	SRS7581812
SL346087	1366819	Residences	Skin	NA	NA	22.3716	114.185	Aboveground (closed area)	Skin	Left palm	Skin	NA	NA	2017 July	Other	NA	res 2 left palm day 9 day	Residence 2	SRS7581824
SL346088	1469759	Residences	Skin	NA	NA	22.3353	114.174	Aboveground (closed area)	Skin	Left palm	Skin	28.3	84	2017 July	Other	NA	residence 4 left palm day 6 night	Residence 4	SRS7581825
SL346089	2503531	Residences	Skin	NA	NA	22.3356	114.174	Aboveground (closed area)	Skin	Left palm	Skin	28.7	84	2017 July	Other	NA	residence 4 left palm day 7 night	Residence 4	SRS7581826
SL346090	1268800	Residences	Skin	NA	NA	22.3353	114.174	Aboveground (closed area)	Skin	Left palm	Skin	27.3	94	2017 July	Other	NA	residence 4 left palm day 5 night	Residence 4	SRS7581827
SL346094	2508911	Residences	Skin	NA	NA	22.3354	114.174	Aboveground (closed area)	Skin	Left palm	Skin	30.5	79	2017 July	Other	NA	residence 4 left palm day 7 day	Residence 4	SRS7581831
SL346095	1951735	Residences	Skin	NA	NA	22.3714	114.185	Aboveground (closed area)	Skin	Left palm	Skin	NA	NA	2017 July	Other	NA	res 2 left palm day 9 night	Residence 2	SRS7581833
SL346100	3058651	Residences	Skin	NA	NA	22.3358	114.174	Aboveground (closed area)	Skin	Left palm	Skin	28	90	2017 July	Other	NA	residence 4 left palm day 4 night	Residence 4	SRS7581838
SL346105	1886876	Residences	Skin	NA	NA	22.3354	114.174	Aboveground (closed area)	Skin	Right palm	Skin	28.3	84	2017 July	Other	NA	residence 4 right palm day 6 night	Residence 4	SRS7581844
SL346108	1837276	Residences	Skin	NA	NA	22.3355	114.174	Aboveground (closed area)	Skin	Left palm	Skin	29.7	80	2017 July	Other	NA	residence 4 left palm day 6 day	Residence 4	SRS7581847
SL346109	2330835	Residences	Skin	NA	NA	22.3355	114.174	Aboveground (closed area)	Skin	Right palm	Skin	28.9	83	2017 July	Other	NA	residence 4 right palm day 8 night	Residence 4	SRS7581848
SL346113	1365354	Residences	Skin	NA	NA	22.3357	114.174	Aboveground (closed area)	Skin	Left palm	Skin	26.7	91	2017 July	Other	NA	residence 4 left palm day 1 night	Residence 4	SRS7581853
SL346115	3006450	Residences	Skin	NA	NA	22.3357	114.174	Aboveground (closed area)	Skin	Right palm	Skin	26.9	95	2017 July	Other	NA	residence 4 right palm . day 3 day	Residence 4	SRS7581854
SL346118	1893728	Residences	Skin	NA	NA	22.3356	114.174	Aboveground (closed area)	Skin	Right palm	Skin	30.4	76	2017 July	Other	NA	residence 4 right palm day 9 day	Residence 4	SRS7581858
SL346126	2078453	Residences	Skin	NA	NA	22.3357	114.174	Aboveground (closed area)	Skin	Left palm	Skin	30.4	76	2017 July	Other	NA	residence 4 left palm day 9 day	Residence 4	SRS7581865
SL346128	2378916	Residences	Skin	NA	NA	22.3355	114.174	Aboveground (closed area)	Skin	Left palm	Skin	28.3	89	2017 July	Other	NA	residence 4 left palm day 5 day	Residence 4	SRS7581866
SL346129	4075028	Residences	Skin	NA	NA	22.3355	114.174	Aboveground (closed area)	Skin	Left palm	Skin	28.5	79	2017 July	Other	NA	residence 4 left palm day 4 day	Residence 4	SRS7581867
SL346137	1533267	Residences	Skin	NA	NA	22.3358	114.174	Aboveground (closed area)	Skin	Right palm	Skin	28.5	79	2017 July	Other	NA	residence 4 right palm day 4 day	Residence 4	SRS7581875
SL346139	2523836	Residences	Skin	NA	NA	22.3355	114.174	Aboveground (closed area)	Skin	Right palm	Skin	26.8	95	2017 July	Other	NA	residence 4 right palm day 2 night	Residence 4	SRS7581876
SL346144	1838186	Residences	Skin	NA	NA	22.3359	114.174	Underground	Skin	Right palm	Skin	28.2	87	2017 July	Other	NA	residence 4 right palm day 3 night	Residence 4	SRS7581879
SL346147	2341025	Residences	Skin	NA	NA	22.3357	114.174	Aboveground (closed area)	Skin	Left palm	Skin	29.3	81	2017 July	Other	NA	residence 4 left palm day 2 day	Residence 4	SRS7581883
SL346149	1249299	Residences	Skin	NA	NA	22.3359	114.174	Aboveground (closed area)	Skin	Right palm	Skin	30.5	79	2017 July	Other	NA	residence 4 right palm day 7 day	Residence 4	SRS7581885
SL346150	1344194	Residences	Skin	NA	NA	22.3358	114.174	Aboveground (closed area)	Skin	Right palm	Skin	28.3	89	2017 July	Other	NA	residence 4 right palm day 5 day	Residence 4	SRS7581886
SL346151	2540831	Residences	Skin	NA	NA	22.3358	114.174	Aboveground (closed area)	Skin	Left palm	Skin	28.9	83	2017 July	Other	NA	residence 4 left palm day 8 night	Residence 4	SRS7581887
SL346160	1781408	Residences	Skin	NA	NA	22.3354	114.174	Aboveground (closed area)	Skin	Left palm	Skin	28.2	87	2017 July	Other	NA	residence 4 left palm day 3 night	Residence 4	SRS7581897
SL346163	1201114	Residences	Skin	NA	NA	22.3357	114.174	Aboveground (closed area)	Skin	Right palm	Skin	30	71	2017 July	Other	NA	residence 4 right palm day 8 day	Residence 4	SRS7581899
SL346167	2413937	Residences	Skin	NA	NA	22.3357	114.174	Aboveground (closed area)	Skin	Right palm	Skin	28	90	2017 July	Other	NA	residence 4 right palm day 4 night	Residence 4	SRS7581902
SL346169	530004	Residences	Skin	NA	NA	22.3356	114.174	Aboveground (closed area)	Skin	Left palm	Skin	30	71	2017 July	Other	NA	residence 4 left palm day 8 day	Residence 4	SRS7581904
SL346171	628142	Residences	Skin	NA	NA	22.3358	114.174	Aboveground (closed area)	Skin	Left palm	Skin	26.7	96	2017 July	Other	NA	residence 4 left palm day 1 day	Residence 4	SRS7581908
SL346172	1585383	Residences	Skin	NA	NA	22.3359	114.174	Aboveground (closed area)	Skin	Right palm	Skin	29.3	81	2017 July	Other	NA	residence 4 right palm day 2 day	Residence 4	SRS7581910
SL346173	642848	Residences	Skin	NA	NA	22.3356	114.174	Aboveground (closed area)	Skin	Right palm	Skin	29.7	80	2017 July	Other	NA	residence 4 right palm day 6 day	Residence 4	SRS7581907
SL345450	2429002	Piers	Pole	Outdoor	Wu Kai Sha	22.4308	114.238	Aboveground (open area)	Pier surface	Pole	Metal	29	76	2017 July 2	NA	NA	NA	NA	SRS8735482
SL345451	1227084	Piers	Pole	Outdoor	Wu Kai Sha	22.4309	114.238	Aboveground (open area)	Pier surface	Pole	Metal	29	76	2017 July 2	NA	NA	NA	NA	SRS8735493
SL345452	2021057	Piers	Pole	Outdoor	Wu Kai Sha	22.431	114.238	Aboveground (open area)	Pier surface	Pole	Metal	29	76	2017 July 2	NA	NA	NA	NA	SRS8735504
SL345453	1640735	Piers	Pole	Outdoor	Wu Kai Sha	22.431	114.238	Aboveground (open area)	Pier surface	Pole	Metal	29	76	2017 July 2	NA	NA	NA	NA	SRS8735515
SL345454	2088793	Piers	Pole	Outdoor	Wu Kai Sha	22.4309	114.238	Aboveground (open area)	Pier surface	Pole	Metal	29	76	2017 July 2	NA	NA	NA	NA	SRS8735525
SL345470	784038	Piers	Pole	Outdoor	Tai Mei Tuk	22.4679	114.233	Aboveground (open area)	Pier surface	Pole	Metal	29	89	2017 July 2	NA	NA	NA	NA	SRS8735587
SL345471	741771	Piers	Pole	Outdoor	Tai Mei Tuk	22.468	114.233	Aboveground (open area)	Pier surface	Pole	Metal	29	89	2017 July 2	NA	NA	NA	NA	SRS8735589
SL345472	624568	Piers	Pole	Outdoor	Tai Mei Tuk	22.468	114.233	Aboveground (open area)	Pier surface	Pole	Metal	29	89	2017 July 2	NA	NA	NA	NA	SRS8735590
SL345473	845657	Piers	Pole	Outdoor	Tai Mei Tuk	22.468	114.233	Aboveground (open area)	Pier surface	Pole	Metal	29	89	2017 July 2	NA	NA	NA	NA	SRS8735591
SL345474	619627	Piers	Pole	Outdoor	Tai Mei Tuk	22.468	114.233	Aboveground (open area)	Pier surface	Pole	Metal	29	89	2017 July 2	NA	NA	NA	NA	SRS8735592
SL345490	1078436	Piers	Pole	Outdoor	Sai Kung	22.3819	114.275	Aboveground (open area)	Pier surface	Pole	Metal	29	79	2017 July 2	NA	NA	NA	NA	SRS8735609
SL345491	1968238	Piers	Pole	Outdoor	Sai Kung	22.3816	114.275	Aboveground (open area)	Pier surface	Pole	Metal	29	79	2017 July 2	NA	NA	NA	NA	SRS8735611
SL345492	2454057	Piers	Pole	Outdoor	Sai Kung	22.3818	114.275	Aboveground (open area)	Pier surface	Pole	Metal	29	79	2017 July 2	NA	NA	NA	NA	SRS8735612
SL345493	1459286	Piers	Pole	Outdoor	Sai Kung	22.3819	114.274	Aboveground (open area)	Pier surface	Pole	Metal	29	79	2017 July 2	NA	NA	NA	NA	SRS8735614
SL345494	992218	Piers	Pole	Outdoor	Sai Kung	22.3812	114.274	Aboveground (open area)	Pier surface	Pole	Metal	29	79	2017 July 2	NA	NA	NA	NA	SRS8735613
SL345510	679894	Piers	Pole	Outdoor	Tuen Mun	22.3716	113.966	Aboveground (open area)	Pier surface	Pole	Metal	31	69	2017 July 1	NA	NA	NA	NA	SRS8735631
SL345511	565458	Piers	Pole	Outdoor	Tuen Mun	22.3714	113.966	Aboveground (open area)	Pier surface	Pole	Metal	31	69	2017 July 1	NA	NA	NA	NA	SRS8735633
SL345512	255620	Piers	Pole	Outdoor	Tuen Mun	22.3714	113.966	Aboveground (open area)	Pier surface	Pole	Metal	31	69	2017 July 1	NA	NA	NA	NA	SRS8735634
SL345513	541111	Piers	Pole	Outdoor	Tuen Mun	22.3712	113.966	Aboveground (open area)	Pier surface	Pole	Metal	31	69	2017 July 1	NA	NA	NA	NA	SRS8735635
SL345514	675545	Piers	Pole	Outdoor	Tuen Mun	22.3712	113.966	Aboveground (open area)	Pier surface	Pole	Metal	31	69	2017 July 1	NA	NA	NA	NA	SRS8735636
SL345535	2505430	Piers	Pole	Outdoor	Tai O	22.2524	113.861	Aboveground (open area)	Pier surface	Pole	Metal	31.4	74	2017 July 2	NA	NA	NA	NA	SRS8735659
SL345536	2800691	Piers	Pole	Outdoor	Peng Chau	22.2842	114.038	Aboveground (open area)	Pier surface	Pole	Metal	33.1	70	2017 June 30	NA	NA	NA	NA	SRS8735660
SL345537	5675718	Piers	Pole	Outdoor	Peng Chau	22.2844	114.038	Aboveground (open area)	Pier surface	Pole	Metal	33.1	70	2017 June 30	NA	NA	NA	NA	SRS8735661
SL345538	11223992	Piers	Pole	Outdoor	Peng Chau	22.2842	114.038	Aboveground (open area)	Pier surface	Pole	Metal	33.1	70	2017 June 30	NA	NA	NA	NA	SRS8735663
SL345539	2085926	Piers	Pole	Outdoor	Peng Chau	22.2843	114.038	Aboveground (open area)	Pier surface	Pole	Metal	33.1	70	2017 June 30	NA	NA	NA	NA	SRS8735662
SL345540	2603436	Piers	Pole	Outdoor	Peng Chau	22.2843	114.038	Aboveground (open area)	Pier surface	Pole	Metal	33.1	70	2017 June 30	NA	NA	NA	NA	SRS8735664
SL345541	2439623	Piers	Pole	Outdoor	Sai Wan Ho	22.2892	114.22	Aboveground (open area)	Pier surface	Pole	Metal	32.1	65	2017 July 1	NA	NA	NA	NA	SRS8735483
SL345543	2461156	Piers	Pole	Outdoor	Tai O	22.2524	113.86	Aboveground (open area)	Pier surface	Pole	Metal	31.4	74	2017 July 2	NA	NA	NA	NA	SRS8735485
SL345549	1439251	Piers	Pole	Outdoor	Sai Wan Ho	22.2894	114.22	Aboveground (open area)	Pier surface	Pole	Metal	32.1	65	2017 July 1	NA	NA	NA	NA	SRS8735491
SL345551	1306346	Piers	Pole	Outdoor	Tai O	22.2522	113.861	Aboveground (open area)	Pier surface	Pole	Metal	31.4	74	2017 July 2	NA	NA	NA	NA	SRS8735494
SL345557	1439947	Piers	Pole	Outdoor	Sai Wan Ho	22.2892	114.22	Aboveground (open area)	Pier surface	Pole	Metal	32.1	65	2017 July 1	NA	NA	NA	NA	SRS8735500
SL345559	2574840	Piers	Pole	Outdoor	Tai O	22.2523	113.861	Aboveground (open area)	Pier surface	Pole	Metal	31.4	74	2017 July 2	NA	NA	NA	NA	SRS8735502
SL345565	1154964	Piers	Pole	Outdoor	Sai Wan Ho	22.2892	114.219	Aboveground (open area)	Pier surface	Pole	Metal	32.1	65	2017 July 1	NA	NA	NA	NA	SRS8735509
SL345567	2111225	Piers	Pole	Outdoor	Tai O	22.2522	113.86	Aboveground (open area)	Pier surface	Pole	Metal	31.4	74	2017 July 2	NA	NA	NA	NA	SRS8735511
SL345568	1035227	Piers	Pole	Outdoor	Cheung Chau	22.2084	114.028	Aboveground (open area)	Pier surface	Pole	Metal	31.7	75	2017 June 29	NA	NA	NA	NA	SRS8735512
SL345569	1072978	Piers	Pole	Outdoor	Cheung Chau	22.2084	114.028	Aboveground (open area)	Pier surface	Pole	Metal	31.7	75	2017 June 29	NA	NA	NA	NA	SRS8735513
SL345570	1571853	Piers	Pole	Outdoor	Cheung Chau	22.2084	114.028	Aboveground (open area)	Pier surface	Pole	Metal	31.7	75	2017 June 29	NA	NA	NA	Residence 1	SRS8735514
SL345571	1036127	Piers	Pole	Outdoor	Cheung Chau	22.2084	114.028	Aboveground (open area)	Pier surface	Pole	Metal	31.7	75	2017 June 29	NA	NA	NA	NA	SRS8735516
SL345572	954958	Piers	Pole	Outdoor	Cheung Chau	22.2086	114.028	Aboveground (open area)	Pier surface	Pole	Metal	31.7	75	2017 June 29	NA	NA	NA	NA	SRS8735517
SL345573	1444069	Piers	Pole	Outdoor	Sai Wan Ho	22.2893	114.219	Aboveground (open area)	Pier surface	Pole	Metal	32.1	65	2017 July 1	NA	NA	NA	NA	SRS8735518
SL345584	2238980	Piers	Pole	Outdoor	Yung Shue Wan	22.2264	114.109	Aboveground (open area)	Pier surface	Pole	Metal	30.1	80	2017 June 29	NA	NA	NA	NA	SRS8735529
SL345601	1171789	Piers	Pole	Outdoor	Yung Shue Wan	22.2263	114.109	Aboveground (open area)	Pier surface	Pole	Metal	30.1	80	2017 June 29	NA	NA	NA	NA	SRS8735548
SL345602	1125726	Piers	Pole	Outdoor	Yung Shue Wan	22.2265	114.109	Aboveground (open area)	Pier surface	Pole	Metal	30.1	80	2017 June 29	NA	NA	NA	NA	SRS8735551
SL345603	1588495	Piers	Pole	Outdoor	Yung Shue Wan	22.2262	114.109	Aboveground (open area)	Pier surface	Pole	Metal	30.1	80	2017 June 29	NA	NA	NA	NA	SRS8735550
SL345604	1032942	Piers	Pole	Outdoor	Yung Shue Wan	22.226	114.108	Aboveground (open area)	Pier surface	Pole	Metal	30.1	80	2017 June 29	NA	NA	NA	NA	SRS8735552
SL336565	1245516	Residences	Headboard	Indoor	NA	22.3952	114.199	Aboveground (closed area)	Indoor surface	Headboard	Wood	28.4	89	2017 July	Other	Other	residence 3 bed headboard day 10 day	Residence 3	SRS7581684
SL336572	1777529	Residences	Headboard	Indoor	NA	22.3956	114.199	Aboveground (closed area)	Indoor surface	Headboard	Wood	29.3	74	2017 July	Other	Other	residence 3 bed headboard day 9 day	Residence 3	SRS7581977
SL336575	1793146	Residences	Headboard	Indoor	NA	22.3957	114.2	Aboveground (closed area)	Indoor surface	Headboard	Wood	29	82	2017 July	Other	Other	residence 3 bed headboard day 10 night	Residence 3	SRS7581596
SL336577	1379755	Residences	Headboard	Indoor	NA	22.3955	114.2	Aboveground (closed area)	Indoor surface	Headboard	Wood	28.9	85	2017 July	Other	Other	residence 3 bed headboard day 9 night	Residence 3	SRS7581618
SL336595	1019662	Residences	Headboard	Indoor	NA	22.2756	114.169	Aboveground (closed area)	Indoor surface	Headboard	Wood	27.9	89	2017 July	Other	Other	residence 1 bed headboard day 3 night	Residence 1	SRS7581762
SL336612	1183490	Residences	Headboard	Indoor	NA	22.2757	114.169	Aboveground (closed area)	Indoor surface	Headboard	Wood	28.1	88	2017 July	Other	Other	residence 1 bed headboard day 5 night	Residence 1	SRS7581818
SL336623	1471727	Residences	Headboard	Indoor	NA	22.2755	114.169	Aboveground (closed area)	Indoor surface	Headboard	Wood	29.9	70	2017 July	Other	Other	residence 1 bed headboard day 8 night	Residence 1	SRS7581919
SL336628	1789331	Residences	Headboard	Indoor	NA	22.2754	114.169	Aboveground (closed area)	Indoor surface	Headboard	Wood	27.5	83	2017 July	Other	Other	residence 1 bed headboard day 6 night	Residence 1	SRS7581926
SL336629	1454310	Residences	Headboard	Indoor	NA	22.2756	114.169	Aboveground (closed area)	Indoor surface	Headboard	Wood	28.7	80	2017 July	Other	Other	residence 1 bed headboard day 7 night	Residence 1	SRS7581925
SL336645	365040	Residences	Headboard	Indoor	NA	22.2756	114.169	Aboveground (closed area)	Indoor surface	Headboard	Wood	29.2	82	2017 July	Other	Other	residence 1 bed headboard day 10 day	Residence 1	SRS7581940
SL336649	1659368	Residences	Headboard	Indoor	NA	22.2757	114.169	Aboveground (closed area)	Indoor surface	Headboard	Wood	28.4	84	2017 July	Other	Other	residence 1 bed headboard day 8 day	Residence 1	SRS7581945
SL336652	1647274	Residences	Headboard	Indoor	NA	22.2757	114.169	Aboveground (closed area)	Indoor surface	Headboard	Wood	26.9	92	2017 July	Other	Other	residence 1 bed headboard day 5 day	Residence 1	SRS7581949
SL336653	1380390	Residences	Headboard	Indoor	NA	22.2757	114.169	Aboveground (closed area)	Indoor surface	Headboard	Wood	30	78	2017 July	Other	Other	residence 1 bed headboard day 6 day	Residence 1	SRS7581951
SL336654	1367852	Residences	Headboard	Indoor	NA	22.2755	114.169	Aboveground (closed area)	Indoor surface	Headboard	Wood	28.1	80	2017 July	Other	Other	residence 1 bed headboard day 7 day	Residence 1	SRS7581950
SL336662	130341	Residences	Headboard	Indoor	NA	22.2755	114.169	Aboveground (closed area)	Indoor surface	Headboard	Wood	29	80	2017 July	Other	Other	Residence 1 bed headboard day 9 day	Residence 1	SRS7581960
SL336664	826077	Residences	Headboard	Indoor	NA	22.2754	114.169	Aboveground (open area)	Indoor surface	Headboard	Wood	27.6	83	2017 July	Other	Other	residence 1 bed headboard day 4 night	Residence 1	SRS7581962
SL336669	899159	Residences	Headboard	Indoor	NA	22.2756	114.169	Aboveground (closed area)	Indoor surface	Headboard	Wood	29	80	2017 July	Other	Other	residence 1 bed headboard day 9 night	Residence 1	SRS7581968
SL336707	2046273	Residences	Headboard	Indoor	NA	22.3949	114.199	Aboveground (closed area)	Indoor surface	Headboard	Wood	28.4	80	2017 July	Other	Other	residence 3 bed headboard day 4 day	Residence 3	SRS7581597
SL336708	712072	Residences	Headboard	Indoor	NA	22.3951	114.199	Aboveground (closed area)	Indoor surface	Headboard	Wood	26.7	90	2017 July	Other	Other	residence 3 bed headboard day 5 day	Residence 3	SRS7581598
SL336709	1293612	Residences	Headboard	Indoor	NA	22.3954	114.199	Aboveground (closed area)	Indoor surface	Headboard	Wood	29.7	78	2017 July	Other	Other	residence 3 bed headboard day 6 day	Residence 3	SRS7581599
SL336710	1515080	Residences	Headboard	Indoor	NA	22.3953	114.2	Aboveground (closed area)	Indoor surface	Headboard	Wood	29.7	74	2017 July	Other	Other	residence 3 bed headboard day 7 day	Residence 3	SRS7581600
SL336711	1556017	Residences	Headboard	Indoor	NA	22.3948	114.199	Aboveground (closed area)	Indoor surface	Headboard	Wood	28.3	86	2017 July	Other	Other	residence 3 bed headboard day 8 day	Residence 3	SRS7581601
SL336712	3184263	Residences	Headboard	Indoor	NA	22.3958	114.2	Aboveground (closed area)	Indoor surface	Headboard	Wood	28	90	2017 July	Other	Other	residence 3 bed headboard day 1 day	Residence 3	SRS7581602
SL336713	370297	Residences	Headboard	Indoor	NA	22.3955	114.2	Aboveground (closed area)	Indoor surface	Headboard	Wood	27	85	2017 July	Other	Other	residence 3 bed headboard day 2 day	Residence 3	SRS7581603
SL336714	1222498	Residences	Headboard	Indoor	NA	22.3956	114.2	Aboveground (closed area)	Indoor surface	Headboard	Wood	28	87	2017 July	Other	Other	residence 3 bed headboard day 3 day	Residence 3	SRS7581604
SL336753	1011363	Residences	Headboard	Indoor	NA	22.3951	114.2	Aboveground (closed area)	Indoor surface	Headboard	Wood	28.8	83	2017 July	Other	Other	residence 3 bed headboard day 2 night	Residence 3	SRS7581646
SL336756	1575753	Residences	Headboard	Indoor	NA	22.3952	114.2	Aboveground (closed area)	Indoor surface	Headboard	Wood	27.3	93	2017 July	Other	Other	residence 3 bed headboard day 5 night	Residence 3	SRS7581649
SL336757	1179114	Residences	Headboard	Indoor	NA	22.3951	114.199	Aboveground (closed area)	Indoor surface	Headboard	Wood	27.1	91	2017 July	Other	Other	residence 3 bed headboard day 6 night	Residence 3	SRS7581650
SL336758	428192	Residences	Headboard	Indoor	NA	22.3957	114.199	Aboveground (closed area)	Indoor surface	Headboard	Wood	28.3	82	2017 July	Other	Other	residence 3 bed headboard day 7 night	Residence 3	SRS7581652
SL336760	2203058	Residences	Headboard	Indoor	NA	22.3957	114.2	Aboveground (closed area)	Indoor surface	Headboard	Wood	28	95	2017 July	Other	Other	residence 3 bed headboard day 1 night	Residence 3	SRS7581654
SL336762	1342645	Residences	Headboard	Indoor	NA	22.3952	114.199	Aboveground (closed area)	Indoor surface	Headboard	Wood	28.2	85	2017 July	Other	Other	residence 3 bed headboard day 3 night	Residence 3	SRS7581656
SL336763	816588	Residences	Headboard	Indoor	NA	22.3955	114.2	Aboveground (closed area)	Indoor surface	Headboard	Wood	26.9	93	2017 July	Other	Other	residence 3 bed headboard day 4 night	Residence 3	SRS7581657
SL336775	1171625	Residences	Headboard	Indoor	NA	22.3957	114.2	Aboveground (closed area)	Indoor surface	Headboard	Wood	28.7	83	2017 July	Other	Other	residence 3 bed headboard day 8 night	Residence 3	SRS7581670
SL336801	1505237	Residences	Headboard	Indoor	NA	22.2755	114.169	Aboveground (closed area)	Indoor surface	Headboard	Wood	26.1	93	2017 July	Other	Other	residence 1 bed headboard day 1 day	Residence 1	SRS7581683
SL336831	2105855	Residences	Headboard	Indoor	NA	22.2756	114.169	Aboveground (closed area)	Indoor surface	Headboard	Wood	26.2	91	2017 July	Other	Other	residence 1 bed headboard day 1 night	Residence 1	SRS7581693
SL336840	1753296	Residences	Headboard	Indoor	NA	22.2758	114.169	Aboveground (closed area)	Indoor surface	Headboard	Wood	26.8	92	2017 July	Other	Other	Residence 1 bed headboard day 2 night	Residence 1	SRS7581699
SL342550	435295	Residences	Headboard	Indoor	NA	22.2757	114.169	Aboveground (closed area)	Indoor surface	Headboard	Wood	27.1	95	2017 July	Other	Other	residence 1 bed headboard day 3 day	Residence 1	SRS7581704
SL345920	2712648	Residences	Headboard	Indoor	NA	22.3716	114.186	Aboveground (closed area)	Indoor surface	Headboard	Metal	NA	NA	2017 July	Other	NA	residence 2 bed headboard day 2 day	Residence 2	SRS7581727
SL345924	1827704	Residences	Headboard	Indoor	NA	22.3707	114.185	Aboveground (closed area)	Indoor surface	Headboard	Metal	NA	NA	2017 July	Other	NA	res 2 bed headboard day 6 day	Residence 2	SRS7581732
SL345925	2036033	Residences	Headboard	Indoor	NA	22.3717	114.186	Aboveground (closed area)	Indoor surface	Headboard	Metal	NA	NA	2017 July	Other	NA	res 2 bed headboard day 7 day	Residence 2	SRS7581733
SL345926	2260219	Residences	Headboard	Indoor	NA	22.3716	114.186	Aboveground (closed area)	Indoor surface	Headboard	Metal	NA	NA	2017 July	Other	NA	res 2 bed headboard day 8 day	Residence 2	SRS7581734
SL345937	1458627	Residences	Headboard	Indoor	NA	22.371	114.185	Aboveground (closed area)	Indoor surface	Headboard	Metal	NA	NA	2017 July	Other	NA	residence 2 bed headboard day 3 day	Residence 2	SRS7581746
SL345938	2052507	Residences	Headboard	Indoor	NA	22.3709	114.185	Aboveground (closed area)	Indoor surface	Headboard	Metal	NA	NA	2017 July	Other	NA	res 2 bed headboard day 4 day	Residence 2	SRS7581747
SL345939	2475861	Residences	Headboard	Indoor	NA	22.3707	114.185	Aboveground (closed area)	Indoor surface	Headboard	Metal	NA	NA	2017 July	Other	NA	res 2 bed headboard day 5 day	Residence 2	SRS7581748
SL345943	2407861	Residences	Headboard	Indoor	NA	22.3715	114.186	Aboveground (closed area)	Indoor surface	Headboard	Metal	28	83	2017 July	Other	NA	residence 2 bed headboard day 1 day	Residence 2	SRS7581753
SL345956	1593356	Residences	Headboard	Indoor	NA	22.3707	114.185	Aboveground (closed area)	Indoor surface	Headboard	Metal	NA	NA	2017 July	Other	NA	res 2 bed headboard day 6 night	Residence 2	SRS7581767
SL345960	1128860	Residences	Headboard	Indoor	NA	22.3712	114.186	Aboveground (closed area)	Indoor surface	Headboard	Metal	NA	NA	2017 July	Other	NA	residence 2 bed headboard day 2 night	Residence 2	SRS7581771
SL345973	2239402	Residences	Headboard	Indoor	NA	22.3716	114.186	Aboveground (closed area)	Indoor surface	Headboard	Metal	NA	NA	2017 July	Other	NA	res .2 bed headboard day 7 night	Residence 2	SRS7581787
SL345978	1879603	Residences	Headboard	Indoor	NA	22.3705	114.185	Aboveground (closed area)	Indoor surface	Headboard	Metal	NA	NA	2017 July	Other	NA	res 2 bed headboard day 4 night	Residence 2	SRS7581791
SL345983	2656416	Residences	Headboard	Indoor	NA	22.3712	114.186	Aboveground (closed area)	Indoor surface	Headboard	Metal	NA	NA	2017 July	Other	NA	residence 2 bed headboard day 1 night	Residence 2	SRS7581798
SL345985	1408124	Residences	Headboard	Indoor	NA	22.3706	114.185	Aboveground (closed area)	Indoor surface	Headboard	Metal	NA	NA	2017 July	Other	NA	residence 2 bed headboard day 3 night	Residence 2	SRS7581800
SL345987	2024557	Residences	Headboard	Indoor	NA	22.371	114.185	Aboveground (closed area)	Indoor surface	Headboard	Metal	NA	NA	2017 July	Other	NA	res 2 bed headboard day 5 night	Residence 2	SRS7581802
SL345990	2393251	Residences	Headboard	Indoor	NA	22.372	114.185	Aboveground (closed area)	Indoor surface	Headboard	Metal	NA	NA	2017 July	Other	NA	res .2 bed headboard day 8 night	Residence 2	SRS7581805
SL346079	2324133	Residences	Headboard	Indoor	NA	22.3717	114.186	Aboveground (closed area)	Indoor surface	Headboard	Metal	NA	NA	2017 July	Other	NA	res 2 bed headboard day 9 day	Residence 2	SRS7581815
SL346081	2394391	Residences	Headboard	Indoor	NA	22.3354	114.174	Aboveground (closed area)	Indoor surface	Headboard	Wood	30	71	2017 July	Other	NA	residence 4 bed headboard day 8 day	Residence 4	SRS7581817
SL346085	2254166	Residences	Headboard	Indoor	NA	22.3356	114.174	Aboveground (closed area)	Indoor surface	Headboard	Wood	26.8	95	2017 July	Other	NA	residence 4 bed headboard day 2 night	Residence 4	SRS7581822
SL346086	1684977	Residences	Headboard	Indoor	NA	22.3356	114.174	Aboveground (closed area)	Indoor surface	Headboard	Wood	26.7	91	2017 July	Other	NA	residence 4 bed headboard day 1 night	Residence 4	SRS7581823
SL346097	2686056	Residences	Headboard	Indoor	NA	22.3357	114.174	Aboveground (closed area)	Indoor surface	Headboard	Wood	28.3	89	2017 July	Other	NA	residence 4 bed headboard day 5 day	Residence 4	SRS7581835
SL346098	3517511	Residences	Headboard	Indoor	NA	22.3355	114.174	Aboveground (closed area)	Indoor surface	Headboard	Wood	28	90	2017 July	Other	NA	residence 4 bed headboard day 4 night	Residence 4	SRS7581836
SL346099	2941327	Residences	Headboard	Indoor	NA	22.3359	114.174	Aboveground (closed area)	Indoor surface	Headboard	Wood	26.9	95	2017 July	Other	NA	residence 4 bed headboard day 3 day	Residence 4	SRS7581837
SL346106	3085239	Residences	Headboard	Indoor	NA	22.3356	114.174	Aboveground (closed area)	Indoor surface	Headboard	Wood	30.4	76	2017 July	Other	NA	residence 4 bed headboard day 9 day	Residence 4	SRS7581845
SL346107	3535898	Residences	Headboard	Indoor	NA	22.3357	114.174	Aboveground (closed area)	Indoor surface	Headboard	Wood	28.2	87	2017 July	Other	NA	residence 4 bed headboard day 4 night	Residence 4	SRS7581846
SL346110	2861689	Residences	Headboard	Indoor	NA	22.3358	114.174	Aboveground (closed area)	Indoor surface	Headboard	Wood	29.3	81	2017 July	Other	NA	residence 4 bed headboard day 2 day	Residence 4	SRS7581849
SL346120	3328991	Residences	Headboard	Indoor	NA	22.3357	114.174	Aboveground (closed area)	Indoor surface	Headboard	Wood	27.3	94	2017 July	Other	NA	residence 4 bed headboard day 5 night	Residence 4	SRS7581857
SL346124	3121618	Residences	Headboard	Indoor	NA	22.3355	114.174	Aboveground (closed area)	Indoor surface	Headboard	Wood	29.7	80	2017 July	Other	NA	residence 4 bed headboard day 6 day	Residence 4	SRS7581863
SL346156	3922180	Residences	Headboard	Indoor	NA	22.336	114.174	Aboveground (closed area)	Indoor surface	Headboard	Wood	28.7	84	2017 July	Other	NA	residence 4 bed headboard day 7 night	Residence 4	SRS7581891
SL346157	3028835	Residences	Headboard	Indoor	NA	22.3356	114.174	Aboveground (closed area)	Indoor surface	Headboard	Wood	30.5	79	2017 July	Other	NA	residence 4 bed headboard day 7 day	Residence 4	SRS7581892
SL346168	2216917	Residences	Headboard	Indoor	NA	22.3358	114.174	Aboveground (closed area)	Indoor surface	Headboard	Wood	28.9	83	2017 July	Other	NA	residence 4 bed headboard day 8 night	Residence 4	SRS7581903
SL336569	2297844	Public facilities	Handrail (subway exit)	Outdoor	NA	22.3955	114.198	Aboveground (mixed area)	Urban public surface	Handrail	Metal	28.4	89	2017 July	East Rail Line	Handrail	fo tan exit a handrail day 10 day	Residence 3	SRS7581943
SL336571	3271212	Public facilities	Handrail (subway exit)	Outdoor	NA	22.3955	114.198	Aboveground (mixed area)	Urban public surface	Handrail	Metal	29	82	2017 July	East Rail Line	Handrail	fo tan exit a handrail day 10 night	Residence 3	SRS7581965
SL336573	2797667	Public facilities	Handrail (subway exit)	Outdoor	NA	22.395	114.198	Aboveground (mixed area)	Urban public surface	Handrail	Metal	28.9	85	2017 July	East Rail Line	Handrail	fo tan exit a handrail day 9 night	Residence 3	SRS7581574
SL336576	2274086	Public facilities	Handrail (subway exit)	Outdoor	NA	22.3954	114.2	Aboveground (mixed area)	Urban public surface	Handrail	Metal	29.3	74	2017 July	East Rail Line	Handrail	fo tan exit a handrail day 9 day	Residence 3	SRS7581607
SL336598	1414031	Public facilities	Handrail (subway exit)	Outdoor	NA	22.2784	114.166	Underground	Urban public surface	Handrail	Metal	26.9	92	2017 July	South Island Line	Handrail	admiralty exit a day 3 night	Residence 1	SRS7581796
SL336619	550707	Public facilities	Handrail (subway exit)	Outdoor	NA	22.2787	114.166	Underground	Urban public surface	Handrail	Metal	28.5	87	2017 July	South Island Line	Handrail	Admiralty Exit A Day 5 Night	Residence 1	SRS7581873
SL336635	2313453	Public facilities	Handrail (subway exit)	Outdoor	NA	22.2784	114.166	Underground	Urban public surface	Handrail	Metal	28.1	80	2017 July	South Island Line	Handrail	Admiralty Exit A Day 7 Day	Residence 1	SRS7581933
SL336637	3641481	Public facilities	Handrail (subway exit)	Outdoor	NA	22.2782	114.166	Underground	Urban public surface	Handrail	Metal	29.9	70	2017 July	South Island Line	Handrail	Admiralty Exit A Day 8 Night	Residence 1	SRS7581935
SL336640	1832233	Public facilities	Handrail (subway exit)	Outdoor	NA	22.2789	114.166	Underground	Urban public surface	Handrail	Metal	27.6	83	2017 July	South Island Line	Handrail	Admiralty Exit A Day 4 Night	Residence 1	SRS7581936
SL336665	1645570	Public facilities	Handrail (subway exit)	Outdoor	NA	22.2787	114.166	Underground	Urban public surface	Handrail	Metal	30.5	76	2017 July	South Island Line	Handrail	Admiralty Exit A Day 6 Day	Residence 1	SRS7581963
SL336672	2430415	Public facilities	Handrail (subway exit)	Outdoor	NA	22.2781	114.166	Underground	Urban public surface	Handrail	Metal	29.5	70	2017 July	South Island Line	Handrail	Admiralty Exit A Day 7 Night	Residence 1	SRS7581971
SL336673	631830	Public facilities	Handrail (subway exit)	Outdoor	NA	22.2784	114.166	Underground	Urban public surface	Handrail	Metal	28.9	81	2017 July	South Island Line	Handrail	Admiralty Exit A Day 8 Day	Residence 1	SRS7581972
SL336674	2690954	Public facilities	Handrail (subway exit)	Outdoor	NA	22.2784	114.166	Underground	Urban public surface	Handrail	Metal	29	80	2017 July	South Island Line	Handrail	Admiralty exit A day 9 day	Residence 1	SRS7581973
SL336676	1565196	Public facilities	Handrail (subway exit)	Outdoor	NA	22.2786	114.167	Underground	Urban public surface	Handrail	Metal	26.9	92	2017 July	South Island Line	Handrail	Admiralty Exit A Day 5 Day	Residence 1	SRS7581975
SL336677	2748813	Public facilities	Handrail (subway exit)	Outdoor	NA	22.2785	114.166	Underground	Urban public surface	Handrail	Metal	27.5	83	2017 July	South Island Line	Handrail	admiralty Exit A Day 6 Night	Residence 1	SRS7581976
SL336678	1431699	Public facilities	Handrail (subway exit)	Outdoor	NA	22.279	114.166	Aboveground (closed area)	Urban public surface	Handrail	Metal	26.3	93	2017 July	South Island Line	Handrail	Admiralty Station Exit A Handrail Day 1 Day	Residence 1	SRS7581978
SL336686	419302	Public facilities	Handrail (subway exit)	Outdoor	NA	22.2787	114.166	Underground	Urban public surface	Handrail	Metal	29.2	80	2017 July	South Island Line	Handrail	Admiralty Station Exit A Handrail day 9 night	Residence 1	SRS7581985
SL336723	2323872	Public facilities	Handrail (subway exit)	Outdoor	NA	22.3952	114.198	Aboveground (mixed area)	Urban public surface	Handrail	Metal	28.4	80	2017 July	East Rail Line	Handrail	fo tan exit a handrail day 4 day	Residence 3	SRS7581614
SL336726	1863400	Public facilities	Handrail (subway exit)	Outdoor	NA	22.3957	114.199	Aboveground (mixed area)	Urban public surface	Handrail	Metal	29.7	74	2017 July	East Rail Line	Handrail	fo tan exit a handrail day 7 day	Residence 3	SRS7581617
SL336727	1867374	Public facilities	Handrail (subway exit)	Outdoor	NA	22.3955	114.198	Aboveground (mixed area)	Urban public surface	Handrail	Metal	28.3	86	2017 July	East Rail Line	Handrail	fo tan exit a handrail day 8 day	Residence 3	SRS7581619
SL336728	1725078	Public facilities	Handrail (subway exit)	Outdoor	NA	22.3955	114.198	Aboveground (mixed area)	Urban public surface	Handrail	Metal	28	90	2017 July	East Rail Line	Handrail	Fo Tan Exit A handrail day 1 day	Residence 3	SRS7581620
SL336729	2102215	Public facilities	Handrail (subway exit)	Outdoor	NA	22.395	114.198	Aboveground (mixed area)	Urban public surface	Handrail	Metal	27	85	2017 July	East Rail Line	Handrail	fo tan exit a handrail day 2 day	Residence 3	SRS7581621
SL336730	1765087	Public facilities	Handrail (subway exit)	Outdoor	NA	22.3953	114.198	Aboveground (mixed area)	Urban public surface	Handrail	Metal	28.2	85	2017 July	East Rail Line	Handrail	fo tan exit a handrail day 3 night	Residence 3	SRS7581622
SL336732	2597987	Public facilities	Handrail (subway exit)	Outdoor	NA	22.3951	114.198	Aboveground (mixed area)	Urban public surface	Handrail	Metal	26.7	90	2017 July	East Rail Line	Handrail	fo tan exit a handrail day 5 day	Residence 3	SRS7581624
SL336733	1806013	Public facilities	Handrail (subway exit)	Outdoor	NA	22.395	114.198	Aboveground (mixed area)	Urban public surface	Handrail	Metal	29.7	78	2017 July	East Rail Line	Handrail	fo tan exit a handrail day 6 day	Residence 3	SRS7581625
SL336738	1595528	Public facilities	Handrail (subway exit)	Outdoor	NA	22.3951	114.198	Aboveground (mixed area)	Urban public surface	Handrail	Metal	28	87	2017 July	East Rail Line	Handrail	fo tan exit a handrail day 3 day	Residence 3	SRS7581631
SL336742	2921344	Public facilities	Handrail (subway exit)	Outdoor	NA	22.3948	114.198	Aboveground (mixed area)	Urban public surface	Handrail	Metal	28.3	83	2017 July	East Rail Line	Handrail	fo tan exit a handrail day 7 night	Residence 3	SRS7581634
SL336744	2723784	Public facilities	Handrail (subway exit)	Outdoor	NA	22.3948	114.198	Aboveground (mixed area)	Urban public surface	Handrail	Metal	28	95	2017 July	East Rail Line	Handrail	fo tan exit a handrail day 1 night	Residence 3	SRS7581636
SL336747	2194233	Public facilities	Handrail (subway exit)	Outdoor	NA	22.3951	114.198	Aboveground (mixed area)	Urban public surface	Handrail	Metal	26.9	93	2017 July	East Rail Line	Handrail	fo tan exit a handrail day 4 night	Residence 3	SRS7581639
SL336749	2619525	Public facilities	Handrail (subway exit)	Outdoor	NA	22.3955	114.198	Aboveground (mixed area)	Urban public surface	Handrail	Metal	27.1	91	2017 July	East Rail Line	Handrail	fo tan exit a railing day 6 night	Residence 3	SRS7581642
SL336759	2097887	Public facilities	Handrail (subway exit)	Outdoor	NA	22.3951	114.198	Aboveground (mixed area)	Urban public surface	Handrail	Metal	28.7	83	2017 July	East Rail Line	Handrail	fo tan exit a handrail day 8 night	Residence 3	SRS7581653
SL336769	1472945	Public facilities	Handrail (subway exit)	Outdoor	NA	22.3951	114.198	Aboveground (mixed area)	Urban public surface	Handrail	Metal	28.8	83	2017 July	East Rail Line	Handrail	fo tan exit a handrail day 2 night	Residence 3	SRS7581664
SL336780	3003901	Public facilities	Handrail (subway exit)	Outdoor	NA	22.3951	114.198	Aboveground (mixed area)	Urban public surface	Handrail	Metal	27.3	93	2017 July	East Rail Line	Handrail	fo tan exit a handrail day 5 night	Residence 3	SRS7581676
SL336819	3298771	Public facilities	Handrail (subway exit)	Outdoor	NA	22.2787	114.166	Underground	Urban public surface	Handrail	Metal	28.2	84	2017 July	South Island Line	Handrail	Admiralty Station Exit A Handrail Day 2 day	Residence 1	SRS7581688
SL336835	1968664	Public facilities	Handrail (subway exit)	Outdoor	NA	22.2789	114.166	Underground	Urban public surface	Handrail	Metal	26.8	92	2017 July	South Island Line	Handrail	Admiralty Station Exit A Day 2 Night	Residence 1	SRS7581697
SL342552	2007777	Public facilities	Handrail (subway exit)	Outdoor	NA	22.2787	114.167	Underground	Urban public surface	Handrail	Metal	26.5	97	2017 July	South Island Line	Handrail	Admiralty exit A day 3 day	Residence 1	SRS7581706
SL345905	1884783	Public facilities	Handrail (subway exit)	Outdoor	NA	22.3722	114.178	Aboveground (mixed area)	Urban public surface	Handrail	Metal	29	86	2017 July	East Rail Line	NA	tai wai exit a handrail day 3 day	Residence 2	SRS7581711
SL345910	2244226	Public facilities	Handrail (subway exit)	Outdoor	NA	22.3721	114.178	Aboveground (mixed area)	Urban public surface	Handrail	Metal	31	69	2017 July	East Rail Line	NA	tai wai exit a handrail day 8 day	Residence 2	SRS7581716
SL345930	2592489	Public facilities	Handrail (subway exit)	Outdoor	NA	22.3729	114.179	Aboveground (mixed area)	Urban public surface	Handrail	Metal	29	84	2017 July	East Rail Line	NA	tai wai exit a handrail day 4 day	Residence 2	SRS7581738
SL345935	2596676	Public facilities	Handrail (subway exit)	Outdoor	NA	22.3727	114.179	Aboveground (mixed area)	Urban public surface	Handrail	Metal	28	83	2017 July	East Rail Line	NA	tai wai exit a handrail day 1 day	Residence 2	SRS7581744
SL345944	3023716	Public facilities	Handrail (subway exit)	Outdoor	NA	22.371	114.186	Aboveground (mixed area)	Urban public surface	Handrail	Metal	NA	NA	2017 July	East Rail Line	NA	tai wai exit a handrail day 2 day	Residence 2	SRS7581754
SL345947	3880280	Public facilities	Handrail (subway exit)	Outdoor	NA	22.3727	114.178	Aboveground (mixed area)	Urban public surface	Handrail	Metal	29	88	2017 July	East Rail Line	NA	tai wai exit a handrail day 5 day	Residence 2	SRS7581757
SL345948	1785453	Public facilities	Handrail (subway exit)	Outdoor	NA	22.3707	114.185	Aboveground (mixed area)	Urban public surface	Handrail	Metal	31	66	2017 July	East Rail Line	NA	tai wai exit a handrail day 6 day	Residence 2	SRS7581758
SL345949	2290090	Public facilities	Handrail (subway exit)	Outdoor	NA	22.3709	114.185	Aboveground (mixed area)	Urban public surface	Handrail	Metal	28	93	2017 July	East Rail Line	NA	tai wai exit a handrail day 7 day	Residence 2	SRS7581759
SL345953	1643892	Public facilities	Handrail (subway exit)	Outdoor	NA	22.3728	114.178	Aboveground (mixed area)	Urban public surface	Handrail	Metal	28	83	2017 July	East Rail Line	NA	tai wai exit a handrail day3 night	Residence 2	SRS7581763
SL345961	2150128	Public facilities	Handrail (subway exit)	Outdoor	NA	22.3709	114.185	Aboveground (mixed area)	Urban public surface	Handrail	Metal	28	86	2017 July	East Rail Line	NA	tai wai exit a handrail day 4 night	Residence 2	SRS7581772
SL345965	2280485	Public facilities	Handrail (subway exit)	Outdoor	NA	22.3728	114.179	Aboveground (mixed area)	Urban public surface	Handrail	Metal	30	73	2017 July	East Rail Line	NA	tai wai exit a handrail day 7 night	Residence 2	SRS7581777
SL345968	1700814	Public facilities	Handrail (subway exit)	Outdoor	NA	22.3724	114.178	Aboveground (mixed area)	Urban public surface	Handrail	Metal	28	83	2017 July	East Rail Line	NA	tai wai exit a handrail day 2 night	Residence 2	SRS7581780
SL345972	2648261	Public facilities	Handrail (subway exit)	Outdoor	NA	22.3725	114.178	Aboveground (mixed area)	Urban public surface	Handrail	Metal	28	93	2017 July	East Rail Line	NA	tai wai exit a exit day 6 night	Residence 2	SRS7581785
SL345974	2224236	Public facilities	Handrail (subway exit)	Outdoor	NA	22.3732	114.179	Aboveground (mixed area)	Urban public surface	Handrail	Metal	30	77	2017 July	East Rail Line	NA	tai wai exit a handrail day 8 night	Residence 2	SRS7581786
SL345979	2580332	Public facilities	Handrail (subway exit)	Outdoor	NA	22.3732	114.179	Aboveground (mixed area)	Urban public surface	Handrail	Metal	27	93	2017 July	East Rail Line	NA	tai wai exit a exit day 5 night	Residence 2	SRS7581792
SL345991	897476	Public facilities	Handrail (subway exit)	Outdoor	NA	22.3727	114.178	Aboveground (mixed area)	Urban public surface	Handrail	Metal	NA	NA	2017 July	East Rail Line	NA	tai wai exit a handrail day 1 night	Residence 2	SRS7581807
SL346084	2919861	Public facilities	Handrail (subway exit)	Outdoor	NA	22.3369	114.176	Underground	Urban public surface	Handrail	Metal	30.4	82	2017 July	East Rail Line	NA	Kowloon Tong Exit C Handrail day 2 day	Residence 4	SRS7581821
SL346091	2406974	Public facilities	Handrail (subway exit)	Outdoor	NA	22.3368	114.176	Underground	Urban public surface	Handrail	Metal	27	95	2017 July	East Rail Line	NA	Kowloon Tong Exit C Handrail day 2 night	Residence 4	SRS7581828
SL346102	2047536	Public facilities	Handrail (subway exit)	Outdoor	NA	22.3368	114.176	Underground	Urban public surface	Handrail	Metal	31.2	73	2017 July	East Rail Line	NA	Kowloon Tong Exit C Handrail day 7 day	Residence 4	SRS7581841
SL346112	2518990	Public facilities	Handrail (subway exit)	Outdoor	NA	22.3366	114.176	Underground	Urban public surface	Handrail	Metal	27.3	94	2017 July	East Rail Line	NA	Kowloon Tong Exit C Handrail day 5 night	Residence 4	SRS7581852
SL346117	1159791	Public facilities	Handrail (subway exit)	Outdoor	NA	22.3369	114.176	Underground	Urban public surface	Handrail	Metal	28.3	84	2017 July	East Rail Line	NA	Kowloon Tong Exit C Handrail day 6 night	Residence 4	SRS7581856
SL346123	1678541	Public facilities	Handrail (subway exit)	Outdoor	NA	22.3369	114.176	Underground	Urban public surface	Handrail	Metal	28.6	82	2017 July	East Rail Line	NA	Kowloon Tong Exit C Handrail day 7 night	Residence 4	SRS7581861
SL346132	3050991	Public facilities	Handrail (subway exit)	Outdoor	NA	22.3368	114.176	Underground	Urban public surface	Handrail	Metal	29.8	77	2017 July	East Rail Line	NA	Kowloon Tong Exit C Handrail day 9 day	Residence 4	SRS7581870
SL346141	2448941	Public facilities	Handrail (subway exit)	Outdoor	NA	22.3368	114.176	Underground	Urban public surface	Handrail	Metal	26.6	92	2017 July	East Rail Line	NA	Kowloon Tong Exit C Handrail day 1 night	Residence 4	SRS7581878
SL346145	1995079	Public facilities	Handrail (subway exit)	Outdoor	NA	22.3368	114.176	Underground	Urban public surface	Handrail	Metal	29.6	79	2017 July	East Rail Line	NA	Kowloon Tong Exit C Handrail day 4 day	Residence 4	SRS7581880
SL346148	1914710	Public facilities	Handrail (subway exit)	Outdoor	NA	22.3368	114.176	Underground	Urban public surface	Handrail	Metal	27.5	92	2017 July	East Rail Line	NA	Kowloon Tong Exit C Handrail day 3 day	Residence 4	SRS7581882
SL346158	2763129	Public facilities	Handrail (subway exit)	Outdoor	NA	22.3368	114.176	Underground	Urban public surface	Handrail	Metal	27.9	90	2017 July	East Rail Line	NA	Kowloon Tong Exit C Handrail day 4 night	Residence 4	SRS7581893
SL346159	3148435	Public facilities	Handrail (subway exit)	Outdoor	NA	22.3369	114.176	Underground	Urban public surface	Handrail	Metal	25.5	90	2017 July	East Rail Line	NA	Kowloon Tong Exit C Handrail day 5 day	Residence 4	SRS7581894
SL346161	2234066	Public facilities	Handrail (subway exit)	Outdoor	NA	22.3368	114.176	Underground	Urban public surface	Handrail	Metal	28.1	88	2017 July	East Rail Line	NA	Kowloon Tong Exit C Handrail day 3 night	Residence 4	SRS7581895
SL345455	3004629	Piers	Handrail (pier)	Outdoor	Wu Kai Sha	22.4312	114.237	Aboveground (open area)	Pier surface	Handrail	Metal	29	76	2017 July 2	NA	NA	NA	NA	SRS8735536
SL345456	2435422	Piers	Handrail (pier)	Outdoor	Wu Kai Sha	22.431	114.238	Aboveground (open area)	Pier surface	Handrail	Metal	29	76	2017 July 2	NA	NA	NA	NA	SRS8735549
SL345457	3844671	Piers	Handrail (pier)	Outdoor	Wu Kai Sha	22.431	114.238	Aboveground (open area)	Pier surface	Handrail	Metal	29	76	2017 July 2	NA	NA	NA	NA	SRS8735709
SL345458	5491144	Piers	Handrail (pier)	Outdoor	Wu Kai Sha	22.4311	114.237	Aboveground (open area)	Pier surface	Handrail	Metal	29	76	2017 July 2	NA	NA	NA	NA	SRS8735569
SL345459	4756855	Piers	Handrail (pier)	Outdoor	Wu Kai Sha	22.4312	114.238	Aboveground (open area)	Pier surface	Handrail	Metal	29	76	2017 July 2	NA	NA	NA	NA	SRS8735576
SL345475	763710	Piers	Handrail (pier)	Outdoor	Tai Mei Tuk	22.4678	114.233	Aboveground (open area)	Pier surface	Handrail	Metal	29	89	2017 July 2	NA	NA	NA	NA	SRS8735594
SL345476	592064	Piers	Handrail (pier)	Outdoor	Tai Mei Tuk	22.4679	114.233	Aboveground (open area)	Pier surface	Handrail	Metal	29	89	2017 July 2	NA	NA	NA	NA	SRS8735593
SL345477	604615	Piers	Handrail (pier)	Outdoor	Tai Mei Tuk	22.4681	114.233	Aboveground (open area)	Pier surface	Handrail	Metal	29	89	2017 July 2	NA	NA	NA	NA	SRS8735595
SL345478	678587	Piers	Handrail (pier)	Outdoor	Tai Mei Tuk	22.468	114.233	Aboveground (open area)	Pier surface	Handrail	Metal	29	89	2017 July 2	NA	NA	NA	NA	SRS8735596
SL345479	623490	Piers	Handrail (pier)	Outdoor	Tai Mei Tuk	22.4679	114.233	Aboveground (open area)	Pier surface	Handrail	Metal	29	89	2017 July 2	NA	NA	NA	NA	SRS8735598
SL345495	876733	Piers	Handrail (pier)	Outdoor	Sai Kung	22.3818	114.275	Aboveground (open area)	Pier surface	Handrail	Metal	29	79	2017 July 2	NA	NA	NA	NA	SRS8735615
SL345496	1704675	Piers	Handrail (pier)	Outdoor	Sai Kung	22.3814	114.274	Aboveground (open area)	Pier surface	Handrail	Metal	29	76	2017 July 2	NA	NA	NA	NA	SRS8735616
SL345497	1630635	Piers	Handrail (pier)	Outdoor	Sai Kung	22.3817	114.275	Aboveground (open area)	Pier surface	Handrail	Metal	29	79	2017 July 2	NA	NA	NA	NA	SRS8735617
SL345498	1243737	Piers	Handrail (pier)	Outdoor	Sai Kung	22.3813	114.275	Aboveground (open area)	Pier surface	Handrail	Metal	29	79	2017 July 2	NA	NA	NA	NA	SRS8735618
SL345499	1923600	Piers	Handrail (pier)	Outdoor	Sai Kung	22.3814	114.274	Aboveground (open area)	Pier surface	Handrail	Metal	29	79	2017 July 2	NA	NA	NA	NA	SRS8735619
SL345515	4333256	Piers	Handrail (pier)	Outdoor	Tuen Mun	22.3712	113.966	Aboveground (open area)	Pier surface	Handrail	Metal	31	69	2017 July 1	NA	NA	NA	NA	SRS8735638
SL345516	3139061	Piers	Handrail (pier)	Outdoor	Tuen Mun	22.3714	113.966	Aboveground (open area)	Pier surface	Handrail	Metal	31	69	2017 July 1	NA	NA	NA	NA	SRS8735637
SL345517	3745499	Piers	Handrail (pier)	Outdoor	Tuen Mun	22.3714	113.966	Aboveground (open area)	Pier surface	Handrail	Metal	31	69	2017 July 1	NA	NA	NA	NA	SRS8735640
SL345518	2567519	Piers	Handrail (pier)	Outdoor	Tuen Mun	22.371	113.974	Aboveground (open area)	Pier surface	Handrail	Metal	31	69	2017 July 1	NA	NA	NA	NA	SRS8735639
SL345519	4101485	Piers	Handrail (pier)	Outdoor	Tuen Mun	22.3713	113.966	Aboveground (open area)	Pier surface	Handrail	Metal	31	69	2017 July 1	NA	NA	NA	NA	SRS8735641
SL345526	1673797	Piers	Handrail (pier)	Outdoor	Tai O	22.2524	113.861	Aboveground (open area)	Pier surface	Handrail	Metal	31.4	74	2017 July 2	NA	NA	NA	NA	SRS8735649
SL345527	1907210	Piers	Handrail (pier)	Outdoor	Tai O	22.2523	113.861	Aboveground (open area)	Pier surface	Handrail	Metal	31.4	74	2017 July 2	NA	NA	NA	NA	SRS8735650
SL345534	3065672	Piers	Handrail (pier)	Outdoor	Tai O	22.2524	113.861	Aboveground (open area)	Pier surface	Handrail	Metal	31.4	74	2017 July 2	NA	NA	NA	NA	SRS8735658
SL345542	2030175	Piers	Handrail (pier)	Outdoor	Tai O	22.2523	113.861	Aboveground (open area)	Pier surface	Handrail	Metal	31.4	74	2017 July 2	NA	NA	NA	NA	SRS8735484
SL345544	2023436	Piers	Handrail (pier)	Outdoor	Peng Chau	22.2842	114.038	Aboveground (open area)	Pier surface	Handrail	Metal	33.1	70	2017 June 30	NA	NA	NA	NA	SRS8735486
SL345545	1281551	Piers	Handrail (pier)	Outdoor	Peng Chau	22.2842	114.038	Aboveground (open area)	Pier surface	Handrail	Metal	33.1	70	2017 June 30	NA	NA	NA	NA	SRS8735487
SL345546	3163312	Piers	Handrail (pier)	Outdoor	Peng Chau	22.2842	114.038	Aboveground (open area)	Pier surface	Handrail	Metal	33.1	70	2017 June 30	NA	NA	NA	NA	SRS8735488
SL345547	1896589	Piers	Handrail (pier)	Outdoor	Peng Chau	22.2842	114.038	Aboveground (open area)	Pier surface	Handrail	Metal	33.1	70	2017 June 30	NA	NA	NA	NA	SRS8735489
SL345548	2667741	Piers	Handrail (pier)	Outdoor	Peng Chau	22.2842	114.038	Aboveground (open area)	Pier surface	Handrail	Metal	33.1	70	2017 June 30	NA	NA	NA	NA	SRS8735490
SL345550	1362657	Piers	Handrail (pier)	Outdoor	Tai O	22.2525	113.861	Aboveground (open area)	Pier surface	Handrail	Metal	31.4	74	2017 July 2	NA	NA	NA	NA	SRS8735492
SL345576	3981995	Piers	Handrail (pier)	Outdoor	Cheung Chau	22.2084	114.028	Aboveground (open area)	Pier surface	Handrail	Metal	31.7	75	2017 June 29	NA	NA	NA	NA	SRS8735546
SL345577	3097987	Piers	Handrail (pier)	Outdoor	Cheung Chau	22.2084	114.028	Aboveground (open area)	Pier surface	Handrail	Metal	31.7	75	2017 June 29	NA	NA	NA	NA	SRS8735521
SL345578	3868416	Piers	Handrail (pier)	Outdoor	Cheung Chau	22.2085	114.028	Aboveground (open area)	Pier surface	Handrail	Metal	31.7	75	2017 June 29	NA	NA	NA	NA	SRS8735522
SL345579	4161739	Piers	Handrail (pier)	Outdoor	Cheung Chau	22.2086	114.028	Aboveground (open area)	Pier surface	Handrail	Metal	31.7	75	2017 June 29	NA	NA	NA	NA	SRS8735523
SL345580	2553199	Piers	Handrail (pier)	Outdoor	Cheung Chau	22.2084	114.028	Aboveground (open area)	Pier surface	Handrail	Metal	31.7	75	2017 June 29	NA	NA	NA	NA	SRS8735524
SL345581	1101028	Piers	Handrail (pier)	Outdoor	Sai Wan Ho	22.2892	114.22	Aboveground (open area)	Pier surface	Handrail	Metal	32.1	65	2017 July 1	NA	NA	NA	NA	SRS8735526
SL345589	1297983	Piers	Handrail (pier)	Outdoor	Sai Wan Ho	22.2894	114.219	Aboveground (open area)	Pier surface	Handrail	Metal	32.1	65	2017 July 1	NA	NA	NA	NA	SRS8735534
SL345597	1838970	Piers	Handrail (pier)	Outdoor	Sai Wan Ho	22.2894	114.219	Aboveground (open area)	Pier surface	Handrail	Metal	32.1	65	2017 July 1	NA	NA	NA	NA	SRS8735543
SL345605	1138829	Piers	Handrail (pier)	Outdoor	Sai Wan Ho	22.2894	114.22	Aboveground (open area)	Pier surface	Handrail	Metal	32.1	65	2017 July 1	NA	NA	NA	NA	SRS8735553
SL345608	1291803	Piers	Handrail (pier)	Outdoor	Yung Shue Wan	22.2263	114.109	Aboveground (open area)	Pier surface	Handrail	Metal	30.1	80	2017 June 29	NA	NA	NA	NA	SRS8735556
SL345609	1879671	Piers	Handrail (pier)	Outdoor	Yung Shue Wan	22.2262	114.109	Aboveground (open area)	Pier surface	Handrail	Metal	30.1	80	2017 June 29	NA	NA	NA	NA	SRS8735557
SL345610	2778967	Piers	Handrail (pier)	Outdoor	Yung Shue Wan	22.2263	114.109	Aboveground (open area)	Pier surface	Handrail	Metal	30.1	80	2017 June 29	NA	NA	NA	NA	SRS8735558
SL345611	2206313	Piers	Handrail (pier)	Outdoor	Yung Shue Wan	22.2266	114.109	Aboveground (open area)	Pier surface	Handrail	Metal	30.1	80	2017 June 29	NA	NA	NA	NA	SRS8735710
SL345612	1410684	Piers	Handrail (pier)	Outdoor	Yung Shue Wan	22.2262	114.109	Aboveground (open area)	Pier surface	Handrail	Metal	30.1	80	2017 June 29	NA	NA	NA	NA	SRS8735560
SL345613	5817141	Piers	Handrail (pier)	Outdoor	Sai Wan Ho	22.2894	114.22	Aboveground (open area)	Pier surface	Handrail	Metal	32.1	65	2017 July 1	NA	NA	NA	NA	SRS8735559
SL336567	3177080	Public facilities	Handrail (park)	Outdoor	NA	22.3959	114.199	Aboveground (open area)	Urban public surface	Handrail	Metal	28.4	89	2017 July	Other	Handrail	fo tan park railing day 10 day	Residence 3	SRS7581906
SL336578	3115457	Public facilities	Handrail (park)	Outdoor	NA	22.3956	114.2	Aboveground (open area)	Urban public surface	Handrail	Metal	29.3	74	2017 July	Other	Handrail	fo tan park handrail day 9 day	Residence 3	SRS7581629
SL336580	2289759	Public facilities	Handrail (park)	Outdoor	NA	22.396	114.2	Aboveground (open area)	Urban public surface	Handrail	Metal	28.9	85	2017 July	Other	Handrail	fo tan park railing day 9 night	Residence 3	SRS7581651
SL336581	2358596	Public facilities	Handrail (park)	Outdoor	NA	22.3956	114.2	Aboveground (open area)	Urban public surface	Handrail	Metal	29	82	2017 July	Other	Handrail	fo tan park railing day 10 night	Residence 3	SRS7581662
SL336596	5565824	Public facilities	Handrail (park)	Outdoor	NA	22.2758	114.169	Aboveground (open area)	Urban public surface	Handrail	Metal	28.5	80	2017 July	Other	Handrail	Kwong Ming Street Student Playground Handrail Day 4 Day	Residence 1	SRS7581773
SL336626	3597037	Public facilities	Handrail (park)	Outdoor	NA	22.2757	114.169	Aboveground (open area)	Urban public surface	Handrail	Metal	28.5	87	2017 July	Other	Handrail	Kwong Ming Street Student Playground Handrail Day 5 Night	Residence 1	SRS7581924
SL336630	4620932	Public facilities	Handrail (park)	Outdoor	NA	22.2755	114.169	Aboveground (open area)	Urban public surface	Handrail	Metal	29.9	70	2017 July	Other	Handrail	Kwong Ming Street Student Playground Handrail Day 8 Night	Residence 1	SRS7581928
SL336631	6118099	Public facilities	Handrail (park)	Outdoor	NA	22.2755	114.169	Aboveground (closed area)	Urban public surface	Handrail	Metal	31.1	74	2017 July	Other	Handrail	Kwong Ming Street Student Playground Handrail day 10 day	Residence 4	SRS7581929
SL336633	2591901	Public facilities	Handrail (park)	Outdoor	NA	22.2757	114.169	Aboveground (open area)	Urban public surface	Handrail	Metal	27.6	83	2017 July	Other	Handrail	Kwong Ming Street Student Playground Handrail Day 4 Night	Residence 1	SRS7581930
SL336642	4050082	Public facilities	Handrail (park)	Outdoor	NA	22.2759	114.169	Aboveground (open area)	Urban public surface	Handrail	Metal	28.1	80	2017 July	Other	Handrail	Kwong Ming Street Student Playground Handrail Day 7 Day	Residence 1	SRS7581938
SL336659	2204039	Public facilities	Handrail (park)	Outdoor	NA	22.2758	114.169	Aboveground (open area)	Urban public surface	Handrail	Metal	30	78	2017 July	Other	Handrail	Kwong Ming Street Student Playground Handrail Day 6 Day	Residence 1	SRS7581957
SL336667	3229894	Public facilities	Handrail (park)	Outdoor	NA	22.2757	114.169	Aboveground (open area)	Urban public surface	Handrail	Metal	28.9	81	2017 July	Other	Handrail	Kwong Ming Street Student Playground Handrail Day 8 Day	Residence 1	SRS7581966
SL336668	3077689	Public facilities	Handrail (park)	Outdoor	NA	22.2758	114.169	Aboveground (open area)	Urban public surface	Handrail	Metal	29	80	2017 July	Other	Handrail	Kwong Ming Street Student Playground Handrail Day 9 Day	Residence 1	SRS7581967
SL336671	3127011	Public facilities	Handrail (park)	Outdoor	NA	22.2757	114.169	Aboveground (open area)	Urban public surface	Handrail	Metal	27.5	83	2017 July	Other	Handrail	Kwong Ming Street Student Playground Handrail Day 6 Night	Residence 1	SRS7581970
SL336680	2552702	Public facilities	Handrail (park)	Outdoor	NA	22.2757	114.169	Aboveground (open area)	Urban public surface	Handrail	Metal	29.2	80	2017 July	Other	Handrail	Kwong Ming Street Student Playground Handrail day 9 night	Residence 1	SRS7581980
SL336682	2257632	Public facilities	Handrail (park)	Outdoor	NA	22.2758	114.169	Aboveground (open area)	Urban public surface	Handrail	Metal	26.9	92	2017 July	Other	Handrail	Kwong Ming Street Student Playground Handrail Day 5 Day	Residence 1	SRS7581982
SL336684	2858239	Public facilities	Handrail (park)	Outdoor	NA	22.2757	114.169	Aboveground (open area)	Urban public surface	Handrail	Metal	29.5	70	2017 July	Other	Handrail	Kwong Ming Street Student Playground Handrail Day 7 Night	Residence 1	SRS7581986
SL336720	2391187	Public facilities	Handrail (park)	Outdoor	NA	22.3959	114.2	Aboveground (open area)	Urban public surface	Handrail	Metal	28	90	2017 July	Other	Handrail	Fo Tan Park Railing Day 1 day	Residence 3	SRS7581611
SL336721	2028157	Public facilities	Handrail (park)	Outdoor	NA	22.3955	114.2	Aboveground (open area)	Urban public surface	Handrail	Metal	27	85	2017 July	Other	Handrail	fo tan park railing day 2 day	Residence 3	SRS7581612
SL336722	1864246	Public facilities	Handrail (park)	Outdoor	NA	22.3952	114.199	Aboveground (open area)	Urban public surface	Handrail	Metal	28.2	85	2017 July	Other	Handrail	fo tan park handrail day 3 night	Residence 3	SRS7581613
SL336724	2532095	Public facilities	Handrail (park)	Outdoor	NA	22.3955	114.2	Aboveground (closed area)	Urban public surface	Handrail	Metal	26.7	90	2017 July	Other	Handrail	fo tan park railing day 5 day	Residence 3	SRS7581615
SL336725	1091984	Public facilities	Handrail (park)	Outdoor	NA	22.3951	114.199	Aboveground (open area)	Urban public surface	Handrail	Metal	29.7	78	2017 July	Other	Handrail	fo tan park railing day 6 day	Residence 3	SRS7581616
SL336731	1147941	Public facilities	Handrail (park)	Outdoor	NA	22.3949	114.199	Aboveground (open area)	Urban public surface	Handrail	Metal	28.4	80	2017 July	Other	Handrail	fo tan park railing day 4 day	Residence 3	SRS7581623
SL336734	2149239	Public facilities	Handrail (park)	Outdoor	NA	22.3952	114.2	Aboveground (open area)	Urban public surface	Handrail	Metal	29.7	74	2017 July	Other	Handrail	fo tan park railing day 7 day	Residence 3	SRS7581626
SL336735	2604046	Public facilities	Handrail (park)	Outdoor	NA	22.3954	114.2	Aboveground (open area)	Urban public surface	Handrail	Metal	28.3	86	2017 July	Other	Handrail	fo tan park handrail day 8 day	Residence 3	SRS7581627
SL336736	2299538	Public facilities	Handrail (park)	Outdoor	NA	22.3956	114.199	Aboveground (open area)	Urban public surface	Handrail	Metal	28	95	2017 July	Other	Handrail	Fo Tan park railing day 1 night	Residence 3	SRS7581628
SL336739	1110009	Public facilities	Handrail (park)	Outdoor	NA	22.3955	114.2	Aboveground (open area)	Urban public surface	Handrail	Metal	26.9	93	2017 July	Other	Handrail	fo tan park railng day 4 night	Residence 3	SRS7581632
SL336741	2378117	Public facilities	Handrail (park)	Outdoor	NA	22.3956	114.2	Aboveground (open area)	Urban public surface	Handrail	Metal	27.1	91	2017 July	Other	Handrail	fo tan park railing day 6 night	Residence 3	SRS7581633
SL336746	2702962	Public facilities	Handrail (park)	Outdoor	NA	22.3945	114.199	Aboveground (open area)	Urban public surface	Handrail	Metal	28	87	2017 July	Other	Handrail	fo tan park handrail day 3 day	Residence 3	SRS7581638
SL336748	2098006	Public facilities	Handrail (park)	Outdoor	NA	22.3955	114.2	Aboveground (open area)	Urban public surface	Handrail	Metal	27.3	93	2017 July	Other	Handrail	fo tan park railing day 5 night	Residence 3	SRS7581641
SL336750	1841696	Public facilities	Handrail (park)	Outdoor	NA	22.3955	114.2	Aboveground (open area)	Urban public surface	Handrail	Metal	28.3	82	2017 July	Other	Handrail	fo tan park railing day 7 night	Residence 3	SRS7581643
SL336767	2486949	Public facilities	Handrail (park)	Outdoor	NA	22.3956	114.199	Aboveground (open area)	Urban public surface	Handrail	Metal	28.7	83	2017 July	Other	Handrail	fo tan park railing day 8 night	Residence 3	SRS7581661
SL336777	1381237	Public facilities	Handrail (park)	Outdoor	NA	22.3955	114.2	Aboveground (open area)	Urban public surface	Handrail	Metal	28.8	83	2017 July	Other	Handrail	fo tan park railing day 2 night	Residence 3	SRS7581672
SL336804	5811461	Public facilities	Handrail (park)	Outdoor	NA	22.2758	114.169	Aboveground (open area)	Urban public surface	Handrail	Metal	25.8	96	2017 July	Other	Handrail	Kwong Ming Street Student Playground Handrail Day 1 Day	Residence 1	SRS7581686
SL336817	5271923	Public facilities	Handrail (park)	Outdoor	NA	22.2757	114.169	Aboveground (open area)	Urban public surface	Handrail	Metal	28.2	84	2017 July	Other	Handrail	Kwong Ming Street Student Playground Handrail day 2 day	Residence 1	SRS7581687
SL336822	5503024	Public facilities	Handrail (park)	Outdoor	NA	22.2757	114.169	Aboveground (open area)	Urban public surface	Handrail	Metal	26.8	92	2017 July	Other	Handrail	Kwong Ming Street Student Playground Handrail day 2 night	Residence 1	SRS7581690
SL336839	6545192	Public facilities	Handrail (park)	Outdoor	NA	22.2757	114.169	Aboveground (open area)	Urban public surface	Handrail	Metal	26.2	92	2017 July	Other	Handrail	Kwong Ming Street Student Playground Handrail Day 1 Night	Residence 1	SRS7581698
SL342551	4029390	Public facilities	Handrail (park)	Outdoor	NA	22.2757	114.169	Aboveground (open area)	Urban public surface	Handrail	Metal	26.5	97	2017 July	Other	Handrail	Kwong Ming Street Student Playground Handrail day 3 day	Residence 1	SRS7581705
SL345903	3600308	Public facilities	Handrail (park)	Outdoor	NA	22.3709	114.185	Aboveground (closed area)	Urban public surface	Handrail	Metal	28	83	2017 July	Other	NA	Sun Tin Village Park Handrail day 1 day	Residence 2	SRS7581709
SL345908	2682538	Public facilities	Handrail (park)	Outdoor	NA	22.3714	114.185	Aboveground (open area)	Urban public surface	Handrail	Metal	31	66	2017 July	Other	NA	Sun Tin Village Park Handrail day 6 day	Residence 2	SRS7581714
SL345913	3283667	Public facilities	Handrail (park)	Outdoor	NA	22.3708	114.185	Aboveground (open area)	Urban public surface	Handrail	Metal	29	86	2017 July	Other	NA	Sun Tin Village Park Handrail day 3 day	Residence 2	SRS7581720
SL345917	5709496	Public facilities	Handrail (park)	Outdoor	NA	22.3716	114.186	Aboveground (open area)	Urban public surface	Handrail	Metal	28	93	2017 July	Other	NA	Sun Tin Village Park Handrail day 7 day	Residence 2	SRS7581724
SL345922	5384860	Public facilities	Handrail (park)	Outdoor	NA	22.371	114.185	Aboveground (closed area)	Urban public surface	Handrail	Metal	29	84	2017 July	Other	NA	Sun Tin Village Park Handrail day 4 day	Residence 2	SRS7581730
SL345923	3864332	Public facilities	Handrail (park)	Outdoor	NA	22.3705	114.185	Aboveground (open area)	Urban public surface	Handrail	Metal	29	88	2017 July	Other	NA	Sun Tin Village Park Handrail day 5 day	Residence 2	SRS7581731
SL345928	3980977	Public facilities	Handrail (park)	Outdoor	NA	22.371	114.185	Aboveground (open area)	Urban public surface	Handrail	Metal	29	85	2017 July	Other	NA	Sun Tin Village Park Handrail day 2 day	Residence 2	SRS7581736
SL345942	2534086	Public facilities	Handrail (park)	Outdoor	NA	22.3717	114.185	Aboveground (closed area)	Urban public surface	Handrail	Metal	31	69	2017 July	Other	NA	Sun Tin Village Park Handrail day 8 day	Residence 2	SRS7581752
SL345951	3306420	Public facilities	Handrail (park)	Outdoor	NA	22.3712	114.185	Aboveground (open area)	Urban public surface	Handrail	Metal	NA	NA	2017 July	Other	NA	Sun Tin Village Park Handrail day 1 night	Residence 2	SRS7581761
SL345963	3857908	Public facilities	Handrail (park)	Outdoor	NA	22.3709	114.185	Aboveground (open area)	Urban public surface	Handrail	Metal	27	93	2017 July	Other	NA	Sun Tin Village Park Handrail day 5 night	Residence 2	SRS7581775
SL345966	5484308	Public facilities	Handrail (park)	Outdoor	NA	22.3714	114.186	Aboveground (closed area)	Urban public surface	Handrail	Metal	30	77	2017 July	Other	NA	Sun Tin Village Park Handrail day 8 night	Residence 2	SRS7581778
SL345980	6574948	Public facilities	Handrail (park)	Outdoor	NA	22.371	114.185	Aboveground (open area)	Urban public surface	Handrail	Metal	28	93	2017 July	Other	NA	Sun Tin Village Park Handrail day 6 night	Residence 2	SRS7581793
SL345992	6067031	Public facilities	Handrail (park)	Outdoor	NA	22.3712	114.186	Aboveground (open area)	Urban public surface	Handrail	Metal	NA	NA	2017 July	Other	NA	Sun Tin Village Park Handrail day 2 night	Residence 2	SRS7581809
SL345993	5020085	Public facilities	Handrail (park)	Outdoor	NA	22.3709	114.185	Aboveground (open area)	Urban public surface	Handrail	Metal	28	83	2017 July	Other	NA	Sun Tin Village Park Handrail day 3 night	Residence 2	SRS7581808
SL345994	5272519	Public facilities	Handrail (park)	Outdoor	NA	22.3712	114.185	Aboveground (open area)	Urban public surface	Handrail	Metal	28	86	2017 July	Other	NA	Sun Tin Village Park Handrail day 4 night	Residence 2	SRS7581810
SL345997	4425713	Public facilities	Handrail (park)	Outdoor	NA	22.3716	114.185	Aboveground (open area)	Urban public surface	Handrail	Metal	30	73	2017 July	Other	NA	Sun Tin Village Park Handrail day 7 night	Residence 2	SRS7581813
SL346093	2906613	Public facilities	Handrail (park)	Outdoor	NA	22.336	114.173	Aboveground (open area)	Urban public surface	Handrail	Metal	30.3	76	2017 July	Other	Handrail	CityU Campus Handrail day 6 day	Residence 4	SRS7581832
SL346096	1738821	Public facilities	Handrail (park)	Outdoor	NA	22.3365	114.172	Aboveground (open area)	Urban public surface	Handrail	Metal	25.5	90	2017 July	Other	Handrail	CityU Campus Handrail day 5 day	Residence 4	SRS7581834
SL346116	4108719	Public facilities	Handrail (park)	Outdoor	NA	22.3365	114.172	Aboveground (open area)	Urban public surface	Handrail	Metal	30.9	78	2017 July	Other	Handrail	CityU Campus Handrail day 7 day	Residence 4	SRS7581855
SL346121	2458843	Public facilities	Handrail (park)	Outdoor	NA	22.3362	114.172	Aboveground (open area)	Urban public surface	Handrail	Metal	30.1	79	2017 July	Other	Handrail	CityU Campus Handrail day 9 day	Residence 4	SRS7581859
SL346125	1614983	Public facilities	Handrail (park)	Outdoor	NA	22.3367	114.171	Aboveground (open area)	Urban public surface	Handrail	Metal	26.9	94	2017 July	Other	Handrail	CityU Campus Handrail day 2 night	Residence 4	SRS7581864
SL346130	439184	Public facilities	Handrail (park)	Outdoor	NA	22.3367	114.172	Aboveground (open area)	Urban public surface	Handrail	Metal	28.1	88	2017 July	Other	Handrail	CityU Campus Handrail day 3 night	Residence 4	SRS7581868
SL346131	1055630	Public facilities	Handrail (park)	Outdoor	NA	22.3362	114.172	Aboveground (closed area)	Urban public surface	Handrail	Metal	27.4	91	2017 July	Other	Handrail	CityU Campus Handrail day 3 day	Residence 4	SRS7581869
SL346133	4391846	Public facilities	Handrail (park)	Outdoor	NA	22.3364	114.172	Aboveground (open area)	Urban public surface	Handrail	Metal	28.7	82	2017 July	Other	Handrail	CityU Campus Handrail day 7 night	Residence 4	SRS7581871
SL346134	5728022	Public facilities	Handrail (park)	Outdoor	NA	22.3362	114.172	Aboveground (open area)	Urban public surface	Handrail	Metal	29.8	67	2017 July	Other	Handrail	CityU Campus Handrail day 8 day	Residence 4	SRS7581872
SL346136	3409022	Public facilities	Handrail (park)	Outdoor	NA	22.3363	114.172	Aboveground (open area)	Urban public surface	Handrail	Metal	27.9	90	2017 July	Other	Handrail	CityU Campus Handrail day 4 night	Residence 4	SRS7581874
SL346140	418297	Public facilities	Handrail (park)	Outdoor	NA	22.3363	114.172	Aboveground (open area)	Urban public surface	Handrail	Metal	27.3	94	2017 July	Other	Handrail	CityU Campus Handrail day 5 night	Residence 4	SRS7581877
SL346146	4395612	Public facilities	Handrail (park)	Outdoor	NA	22.3363	114.172	Aboveground (open area)	Urban public surface	Handrail	Metal	28.3	84	2017 July	Other	Handrail	CityU Campus Handrail day 6 night	Residence 4	SRS7581881
SL346152	1171965	Public facilities	Handrail (park)	Outdoor	NA	22.3364	114.172	Aboveground (open area)	Urban public surface	Handrail	Metal	29.4	78	2017 July	Other	Handrail	CityU Campus Handrail day 4 day	Residence 4	SRS7581890
SL346165	2480515	Public facilities	Handrail (park)	Outdoor	NA	22.3365	114.172	Aboveground (open area)	Urban public surface	Handrail	Metal	26.7	93	2017 July	Other	Handrail	CityU Campus Handrail Day 1 night	Residence 4	SRS7581900
SL346170	1325561	Public facilities	Handrail (park)	Outdoor	NA	22.3371	114.171	Aboveground (open area)	Urban public surface	Handrail	Metal	28.7	82	2017 July	Other	Handrail	CityU Campus Handrail day 8 night	Residence 4	SRS7581905
SL345445	8570791	Piers	Floor	Outdoor	Wu Kai Sha	22.4311	114.237	Aboveground (open area)	Pier surface	Floor	Concrete	29	76	2017 July 2	NA	NA	NA	NA	SRS8735610
SL345446	8006322	Piers	Floor	Outdoor	Wu Kai Sha	22.4314	114.238	Aboveground (open area)	Pier surface	Floor	Concrete	29	76	2017 July 2	NA	NA	NA	NA	SRS8735620
SL345447	7632064	Piers	Floor	Outdoor	Wu Kai Sha	22.4309	114.238	Aboveground (open area)	Pier surface	Floor	Concrete	29	76	2017 July 2	NA	NA	NA	NA	SRS8735632
SL345448	6165877	Piers	Floor	Outdoor	Wu Kai Sha	22.431	114.238	Aboveground (open area)	Pier surface	Floor	Concrete	29	76	2017 July 2	NA	NA	NA	NA	SRS8735642
SL345449	4915784	Piers	Floor	Outdoor	Wu Kai Sha	22.4309	114.238	Aboveground (open area)	Pier surface	Floor	Concrete	29	76	2017 July 2	NA	NA	NA	NA	SRS8735654
SL345465	3863276	Piers	Floor	Outdoor	Tai Mei Tuk	22.4681	114.233	Aboveground (open area)	Pier surface	Floor	Concrete	29	89	2017 July 2	NA	NA	NA	NA	SRS8735582
SL345466	4471918	Piers	Floor	Outdoor	Tai Mei Tuk	22.4681	114.233	Aboveground (open area)	Pier surface	Floor	Concrete	29	89	2017 July 2	NA	NA	NA	NA	SRS8735583
SL345467	4884947	Piers	Floor	Outdoor	Tai Mei Tuk	22.468	114.233	Aboveground (open area)	Pier surface	Floor	Concrete	29	89	2017 July 2	NA	NA	NA	NA	SRS8735584
SL345468	4071142	Piers	Floor	Outdoor	Tai Mei Tuk	22.4678	114.233	Aboveground (open area)	Pier surface	Floor	Concrete	29	89	2017 July 2	NA	NA	NA	NA	SRS8735585
SL345469	7615677	Piers	Floor	Outdoor	Tai Mei Tuk	22.4681	114.233	Aboveground (open area)	Pier surface	Floor	Concrete	29	89	2017 July 2	NA	NA	NA	NA	SRS8735586
SL345485	3158728	Piers	Floor	Outdoor	Sai Kung	22.3818	114.274	Aboveground (open area)	Pier surface	Floor	Concrete	29	79	2017 July 2	NA	NA	NA	NA	SRS8735603
SL345486	3394758	Piers	Floor	Outdoor	Sai Kung	22.3821	114.275	Aboveground (open area)	Pier surface	Floor	Concrete	29	79	2017 July 2	NA	NA	NA	NA	SRS8735605
SL345487	2147860	Piers	Floor	Outdoor	Sai Kung	22.382	114.275	Aboveground (open area)	Pier surface	Floor	Concrete	29	79	2017 July 2	NA	NA	NA	NA	SRS8735607
SL345488	2912138	Piers	Floor	Outdoor	Sai Kung	22.3817	114.275	Aboveground (open area)	Pier surface	Floor	Concrete	29	79	2017 July 2	NA	NA	NA	NA	SRS8735606
SL345489	3250024	Piers	Floor	Outdoor	Sai Kung	22.3818	114.275	Aboveground (open area)	Pier surface	Floor	Concrete	29	79	2017 July 2	NA	NA	NA	NA	SRS8735608
SL345505	4236097	Piers	Floor	Outdoor	Tuen Mun	22.3714	113.966	Aboveground (open area)	Pier surface	Floor	Concrete	31	69	2017 July 1	NA	NA	NA	NA	SRS8735626
SL345506	3433438	Piers	Floor	Outdoor	Tuen Mun	22.3715	113.966	Aboveground (open area)	Pier surface	Floor	Concrete	31	69	2017 July 1	NA	NA	NA	NA	SRS8735627
SL345507	4882254	Piers	Floor	Outdoor	Tuen Mun	22.3711	113.966	Aboveground (open area)	Pier surface	Floor	Concrete	31	69	2017 July 1	NA	NA	NA	NA	SRS8735628
SL345508	4081015	Piers	Floor	Outdoor	Tuen Mun	22.3716	113.966	Aboveground (open area)	Pier surface	Floor	Concrete	31	69	2017 July 1	NA	NA	NA	NA	SRS8735629
SL345509	3600816	Piers	Floor	Outdoor	Tuen Mun	22.3714	113.966	Aboveground (open area)	Pier surface	Floor	Concrete	31	69	2017 July 1	NA	NA	NA	NA	SRS8735630
SL345525	3289284	Piers	Floor	Outdoor	Sai Wan Ho	22.2893	114.22	Aboveground (open area)	Pier surface	Floor	Concrete	32.1	65	2017 July 1	NA	NA	NA	NA	SRS8735648
SL345528	6540893	Piers	Floor	Outdoor	Peng Chau	22.2843	114.038	Aboveground (open area)	Pier surface	Floor	Concrete	33.1	70	2017 June 30	NA	NA	NA	NA	SRS8735651
SL345529	4241391	Piers	Floor	Outdoor	Peng Chau	22.2843	114.038	Aboveground (open area)	Pier surface	Floor	Concrete	33.1	70	2017 June 30	NA	NA	NA	NA	SRS8735652
SL345530	3811891	Piers	Floor	Outdoor	Peng Chau	22.2843	114.038	Aboveground (open area)	Pier surface	Floor	Concrete	33.1	70	2017 June 30	NA	NA	NA	NA	SRS8735653
SL345531	2931934	Piers	Floor	Outdoor	Peng Chau	22.2843	114.038	Aboveground (open area)	Pier surface	Floor	Concrete	33.1	70	2017 June 30	NA	NA	NA	NA	SRS8735655
SL345532	11583510	Piers	Floor	Outdoor	Peng Chau	22.2843	114.038	Aboveground (open area)	Pier surface	Floor	Concrete	33.1	70	2017 June 30	NA	NA	NA	NA	SRS8735656
SL345533	6207067	Piers	Floor	Outdoor	Sai Wan Ho	22.2892	114.22	Aboveground (open area)	Pier surface	Floor	Concrete	32.1	65	2017 July 1	NA	NA	NA	NA	SRS8735657
SL345560	4607186	Piers	Floor	Outdoor	Cheung Chau	22.208	114.028	Aboveground (open area)	Pier surface	Floor	Concrete	31.7	75	2017 June 29	NA	NA	NA	NA	SRS8735503
SL345561	4619701	Piers	Floor	Outdoor	Cheung Chau	22.2081	114.029	Aboveground (open area)	Pier surface	Floor	Concrete	31.7	75	2017 June 29	NA	NA	NA	NA	SRS8735505
SL345562	5615368	Piers	Floor	Outdoor	Cheung Chau	22.2079	114.028	Aboveground (open area)	Pier surface	Floor	Concrete	31.7	75	2017 June 29	NA	NA	NA	NA	SRS8735506
SL345563	5874476	Piers	Floor	Outdoor	Cheung Chau	22.208	114.028	Aboveground (open area)	Pier surface	Floor	Concrete	31.7	75	2017 June 29	NA	NA	NA	NA	SRS8735507
SL345564	3633305	Piers	Floor	Outdoor	Cheung Chau	22.208	114.029	Aboveground (open area)	Pier surface	Floor	Concrete	31.7	75	2017 June 29	NA	NA	NA	NA	SRS8735508
SL345575	9977084	Piers	Floor	Outdoor	Tai O	22.2523	113.86	Aboveground (open area)	Pier surface	Floor	Concrete	31.4	74	2017 July 2	NA	NA	NA	NA	SRS8735520
SL345583	6047905	Piers	Floor	Outdoor	Tai O	22.2523	113.861	Aboveground (open area)	Pier surface	Floor	Concrete	31.4	74	2017 July 2	NA	NA	NA	NA	SRS8735528
SL345591	5784959	Piers	Floor	Outdoor	Tai O	22.2525	113.861	Aboveground (open area)	Pier surface	Floor	Concrete	31.4	74	2017 July 2	NA	NA	NA	NA	SRS8735537
SL345593	5672522	Piers	Floor	Outdoor	Yung Shue Wan	22.2262	114.109	Aboveground (open area)	Pier surface	Floor	Concrete	30.1	80	2017 June 29	NA	NA	NA	NA	SRS8735539
SL345594	7770635	Piers	Floor	Outdoor	Yung Shue Wan	22.2264	114.109	Aboveground (open area)	Pier surface	Floor	Concrete	30.1	80	2017 June 29	NA	NA	NA	NA	SRS8735540
SL345595	6909283	Piers	Floor	Outdoor	Yung Shue Wan	22.2262	114.109	Aboveground (open area)	Pier surface	Floor	Concrete	30.1	80	2017 June 29	NA	NA	NA	NA	SRS8735541
SL345596	7964883	Piers	Floor	Outdoor	Yung Shue Wan	22.226	114.109	Aboveground (open area)	Pier surface	Floor	Concrete	30.1	80	2017 June 29	NA	NA	NA	NA	SRS8735542
SL345598	4105789	Piers	Floor	Outdoor	Sai Wan Ho	22.2893	114.219	Aboveground (open area)	Pier surface	Floor	Concrete	32.1	65	2017 July 1	NA	NA	NA	NA	SRS8735544
SL345599	11038412	Piers	Floor	Outdoor	Tai O	22.2522	113.861	Aboveground (open area)	Pier surface	Floor	Concrete	31.4	74	2017 July 2	NA	NA	NA	NA	SRS8735545
SL345600	3395276	Piers	Floor	Outdoor	Yung Shue Wan	22.2263	114.109	Aboveground (open area)	Pier surface	Floor	Concrete	30.1	80	2017 June 29	NA	NA	NA	NA	SRS8735547
SL345606	4310068	Piers	Floor	Outdoor	Sai Wan Ho	22.2894	114.22	Aboveground (open area)	Pier surface	Floor	Concrete	32.1	65	2017 July 1	NA	NA	NA	NA	SRS8735555
SL345607	11032392	Piers	Floor	Outdoor	Tai O	22.2523	113.86	Aboveground (open area)	Pier surface	Floor	Concrete	31.4	74	2017 July 2	NA	NA	NA	NA	SRS8735554
SL345614	6291370	Piers	Floor	Outdoor	Sai Wan Ho	22.2893	114.22	Aboveground (open area)	Pier surface	Floor	Concrete	32.1	65	2017 July 1	NA	NA	NA	NA	SRS8735561
SL336566	158522	Residences	Doorknob	Indoor	NA	22.3956	114.2	Aboveground (closed area)	Indoor surface	Door knob	Metal	28.4	89	2017 July	Other	Other	residence 3 door knob day 10 day	Residence 3	SRS7581795
SL336574	1023978	Residences	Doorknob	Indoor	NA	22.3954	114.2	Aboveground (closed area)	Indoor surface	Door knob	Metal	29.3	74	2017 July	Other	Other	residence 3 door knob day 9 day	Residence 3	SRS7581585
SL336579	3061364	Residences	Doorknob	Indoor	NA	22.3961	114.2	Aboveground (closed area)	Indoor surface	Door knob	Metal	28.9	85	2017 July	Other	Other	residence 3 door knob day 9 night	Residence 3	SRS7581640
SL336586	2137111	Residences	Doorknob	Indoor	NA	22.3958	114.2	Aboveground (closed area)	Indoor surface	Door knob	Metal	29	82	2017 July	Other	Other	residence 3 door knob day 10 night	Residence 3	SRS7581718
SL336589	1893208	Residences	Doorknob	Indoor	NA	22.2757	114.169	Aboveground (closed area)	Indoor surface	Door knob	Metal	27.9	89	2017 July	Other	Other	residence 1 door knob day 3 night	Residence 1	SRS7581740
SL336597	1549284	Residences	Doorknob	Indoor	NA	22.2757	114.169	Aboveground (closed area)	Indoor surface	Door knob	Metal	28.2	82	2017 July	Other	Other	Residence 1 door knob day 4 day	Residence 1	SRS7581784
SL336613	1197461	Residences	Doorknob	Indoor	NA	22.2755	114.169	Aboveground (closed area)	Indoor surface	Door knob	Metal	28.1	88	2017 July	Other	Other	residence 1 door knob day 5 night	Residence 1	SRS7581829
SL336616	1528329	Residences	Doorknob	Indoor	NA	22.2755	114.169	Aboveground (closed area)	Indoor surface	Door knob	Metal	29.9	70	2017 July	Other	Other	residence 1 door knob day 8 night	Residence 1	SRS7581862
SL336621	1245515	Residences	Doorknob	Indoor	NA	22.2757	114.169	Aboveground (closed area)	Indoor surface	Door knob	Metal	27.5	83	2017 July	Other	Other	residence 1 door knob day 6 night	Residence 1	SRS7581896
SL336636	1819452	Residences	Doorknob	Indoor	NA	22.2757	114.169	Aboveground (closed area)	Indoor surface	Door knob	Metal	28.7	80	2017 July	Other	Other	residence 1 door knob day 7 night	Residence 1	SRS7581934
SL336643	1067389	Residences	Doorknob	Indoor	NA	22.2757	114.169	Aboveground (closed area)	Indoor surface	Door knob	Metal	28.4	84	2017 July	Other	Other	residential 1 door knob day 8 day	Residence 1	SRS7581939
SL336646	118162	Residences	Doorknob	Indoor	NA	22.2757	114.169	Aboveground (closed area)	Indoor surface	Door knob	Metal	26.9	92	2017 July	Other	Other	residence 1 door knob day 5 day	Residence 1	SRS7581942
SL336647	1059981	Residences	Doorknob	Indoor	NA	22.2755	114.169	Aboveground (closed area)	Indoor surface	Door knob	Metal	30	78	2017 July	Other	Other	residence 1 door knob day 6 day	Residence 1	SRS7581944
SL336648	1076034	Residences	Doorknob	Indoor	NA	22.2756	114.169	Aboveground (closed area)	Indoor surface	Door knob	Metal	28.1	80	2017 July	Other	Other	residence 1 door knob day 7 day	Residence 1	SRS7581946
SL336651	1494188	Residences	Doorknob	Indoor	NA	22.2757	114.169	Aboveground (closed area)	Indoor surface	Door knob	Metal	29.2	82	2017 July	Other	Other	residence 1 door knob day 10 day	Residence 1	SRS7581948
SL336656	899078	Residences	Doorknob	Indoor	NA	22.2757	114.169	Aboveground (closed area)	Indoor surface	Door knob	Metal	29	80	2017 July	Other	Other	Residence 1 door knob day 9 day	Residence 1	SRS7581953
SL336675	1427888	Residences	Doorknob	Indoor	NA	22.2754	114.169	Aboveground (closed area)	Indoor surface	Door knob	Metal	29	80	2017 July	Other	Other	residence 1 door knob day 9 night	Residence 1	SRS7581974
SL336704	1423191	Residences	Doorknob	Indoor	NA	22.3959	114.199	Aboveground (closed area)	Indoor surface	Door knob	Metal	28	90	2017 July	Other	Other	residence 3 door knob day 1 day	Residence 3	SRS7581593
SL336705	774026	Residences	Doorknob	Indoor	NA	22.3957	114.2	Aboveground (closed area)	Indoor surface	Door knob	Metal	27	85	2017 July	Other	Other	residence 3 door knob day 2 day	Residence 3	SRS7581594
SL336706	1122143	Residences	Doorknob	Indoor	NA	22.3957	114.2	Aboveground (closed area)	Indoor surface	Door knob	Metal	28	87	2017 July	Other	Other	residence 3 door knob day 3 day	Residence 3	SRS7581595
SL336715	2319492	Residences	Doorknob	Indoor	NA	22.3949	114.199	Aboveground (closed area)	Indoor surface	Door knob	Metal	28.4	80	2017 July	Other	Other	residence 3 door knob day 4 day	Residence 3	SRS7581605
SL336716	2863151	Residences	Doorknob	Indoor	NA	22.3953	114.2	Aboveground (closed area)	Indoor surface	Door knob	Metal	26.7	90	2017 July	Other	Other	residence 3 door knob day 5 day	Residence 3	SRS7581606
SL336717	2009536	Residences	Doorknob	Indoor	NA	22.3951	114.2	Aboveground (closed area)	Indoor surface	Door knob	Metal	29.7	78	2017 July	Other	Other	residence 3 door knob day 6 day	Residence 3	SRS7581608
SL336718	597304	Residences	Doorknob	Indoor	NA	22.3953	114.199	Aboveground (closed area)	Indoor surface	Door knob	Metal	29.7	74	2017 July	Other	Other	residence 3 door knob day 7 day	Residence 3	SRS7581609
SL336719	653624	Residences	Doorknob	Indoor	NA	22.3952	114.2	Aboveground (closed area)	Indoor surface	Door knob	Metal	28.3	86	2017 July	Other	Other	residence 3 door knob day 8 day	Residence 3	SRS7581610
SL336752	2826942	Residences	Doorknob	Indoor	NA	22.3951	114.2	Aboveground (closed area)	Indoor surface	Door knob	Metal	28	95	2017 July	Other	Other	residence 3 door knob day 1 night	Residence 3	SRS7581645
SL336754	2326142	Residences	Doorknob	Indoor	NA	22.3951	114.199	Aboveground (closed area)	Indoor surface	Door knob	Metal	28.2	85	2017 July	Other	Other	residence 3 door knob day 3 night	Residence 3	SRS7581647
SL336755	2263816	Residences	Doorknob	Indoor	NA	22.3949	114.2	Aboveground (closed area)	Indoor surface	Door knob	Metal	26.9	93	2017 July	Other	Other	residence 3 door knob day 4 night	Residence 3	SRS7581648
SL336761	2085083	Residences	Doorknob	Indoor	NA	22.3952	114.199	Aboveground (closed area)	Indoor surface	Door knob	Metal	28.8	83	2017 July	Other	Other	residence 3 door knob day 2 night	Residence 3	SRS7581655
SL336764	3740406	Residences	Doorknob	Indoor	NA	22.3953	114.199	Aboveground (closed area)	Indoor surface	Door knob	Metal	27.3	93	2017 July	Other	Other	residence 3 door knob day 5 night	Residence 3	SRS7581658
SL336765	2636084	Residences	Doorknob	Indoor	NA	22.3951	114.199	Aboveground (closed area)	Indoor surface	Door knob	Metal	27.1	91	2017 July	Other	Other	residence 3 door knob day 6 night	Residence 3	SRS7581659
SL336766	1668609	Residences	Doorknob	Indoor	NA	22.3949	114.199	Aboveground (closed area)	Indoor surface	Door knob	Metal	28.3	82	2017 July	Other	Other	residence 3 door knob day 7 night	Residence 3	SRS7581660
SL336783	2993991	Residences	Doorknob	Indoor	NA	22.3955	114.199	Aboveground (closed area)	Indoor surface	Door knob	Metal	28.7	83	2017 July	Other	Other	residence 3 door knob day 8 night	Residence 3	SRS7581679
SL336799	755364	Residences	Doorknob	Indoor	NA	22.2756	114.169	Aboveground (closed area)	Indoor surface	Door knob	Metal	26.1	93	2017 July	Other	Other	Residence 1 door knob day 1 day	Residence 1	SRS7581682
SL336834	1758941	Residences	Doorknob	Indoor	NA	22.2755	114.169	Aboveground (closed area)	Indoor surface	Door knob	Metal	26.2	91	2017 July	Other	Other	Residence 1 Door Knob Day 1 Night	Residence 1	SRS7581695
SL336842	1703402	Residences	Doorknob	Indoor	NA	22.2755	114.169	Aboveground (closed area)	Indoor surface	Door knob	Metal	26.8	92	2017 July	Other	Other	Residence 1 Door Knob Day 2 Night	Residence 1	SRS7581700
SL342549	956895	Residences	Doorknob	Indoor	NA	22.2756	114.169	Aboveground (closed area)	Indoor surface	Door knob	Metal	27.1	95	2017 July	Other	Other	Residence 1 door knob day 3 day	Residence 1	SRS7581703
SL345912	1864672	Residences	Doorknob	Indoor	NA	22.3708	114.185	Aboveground (closed area)	Indoor surface	Door knob	Metal	NA	NA	2017 July	Other	NA	residence 2 door knob day 2 day	Residence 2	SRS7581719
SL345914	2741358	Residences	Doorknob	Indoor	NA	22.3711	114.185	Aboveground (closed area)	Indoor surface	Door knob	Metal	NA	NA	2017 July	Other	NA	res 2 door knob day 4 day	Residence 2	SRS7581721
SL345918	2804012	Residences	Doorknob	Indoor	NA	22.3717	114.185	Aboveground (closed area)	Indoor surface	Door knob	Metal	NA	NA	2017 July	Other	NA	res 2 door knob day 8 day	Residence 2	SRS7581725
SL345927	2291997	Residences	Doorknob	Indoor	NA	22.3708	114.185	Aboveground (closed area)	Indoor surface	Door knob	Metal	28	83	2017 July	Other	NA	residence 2 door knob day 1 day	Residence 2	SRS7581735
SL345931	1716230	Residences	Doorknob	Indoor	NA	22.3706	114.185	Aboveground (closed area)	Indoor surface	Door knob	Metal	NA	NA	2017 July	Other	NA	res 2 door knob day 5 day	Residence 2	SRS7581739
SL345932	1105632	Residences	Doorknob	Indoor	NA	22.3709	114.185	Aboveground (closed area)	Indoor surface	Door knob	Metal	NA	NA	2017 July	Other	NA	res 2 door knob day 6 day	Residence 2	SRS7581741
SL345941	2027349	Residences	Doorknob	Indoor	NA	22.3708	114.185	Aboveground (closed area)	Indoor surface	Door knob	Metal	NA	NA	2017 July	Other	NA	res 2 door knob day 7 day	Residence 2	SRS7581750
SL345945	2226550	Residences	Doorknob	Indoor	NA	22.3712	114.185	Aboveground (closed area)	Indoor surface	Door knob	Metal	NA	NA	2017 July	Other	NA	residence 2 door knob day 3 day	Residence 2	SRS7581755
SL345952	1242849	Residences	Doorknob	Indoor	NA	22.3708	114.185	Aboveground (closed area)	Indoor surface	Door knob	Metal	NA	NA	2017 July	Other	NA	residence 2 door knob day 2 day	Residence 2	SRS7581766
SL345967	1792447	Residences	Doorknob	Indoor	NA	22.3708	114.185	Aboveground (closed area)	Indoor surface	Door knob	Metal	NA	NA	2017 July	Other	NA	residence 2 door knob day1 night	Residence 2	SRS7581779
SL345969	1833594	Residences	Doorknob	Indoor	NA	22.3709	114.185	Aboveground (closed area)	Indoor surface	Door knob	Metal	NA	NA	2017 July	Other	NA	res 2 door knob day 3 night	Residence 2	SRS7581781
SL345986	2983413	Residences	Doorknob	Indoor	NA	22.3708	114.185	Aboveground (closed area)	Indoor surface	Door knob	Metal	NA	NA	2017 July	Other	NA	res 2 door knob day 4 night	Residence 2	SRS7581801
SL345988	1463921	Residences	Doorknob	Indoor	NA	22.3709	114.185	Aboveground (closed area)	Indoor surface	Door knob	Metal	NA	NA	2017 July	Other	NA	res 2 door knob day 6 night	Residence 2	SRS7581803
SL345989	1812046	Residences	Doorknob	Indoor	NA	22.3717	114.186	Aboveground (closed area)	Indoor surface	Door knob	Metal	NA	NA	2017 July	Other	NA	res 2 door knob day 7 night	Residence 2	SRS7581804
SL345995	2576805	Residences	Doorknob	Indoor	NA	22.3709	114.185	Aboveground (closed area)	Indoor surface	Door knob	Metal	NA	NA	2017 July	Other	NA	res 2 door knob day 5 night	Residence 2	SRS7581811
SL345998	2653676	Residences	Doorknob	Indoor	NA	22.3716	114.186	Aboveground (closed area)	Indoor surface	Door knob	Metal	NA	NA	2017 July	Other	NA	res 2 door knob day 8 night	Residence 2	SRS7581814
SL346080	3097402	Residences	Doorknob	Indoor	NA	22.3357	114.174	Aboveground (closed area)	Indoor surface	Door knob	Metal	30	71	2017 July	Other	NA	residence 4 door knob day 8 day	Residence 4	SRS7581816
SL346082	1990113	Residences	Doorknob	Indoor	NA	22.3353	114.174	Aboveground (closed area)	Indoor surface	Door knob	Metal	28	90	2017 July	Other	NA	residence 4 door knob day 4 night	Residence 4	SRS7581819
SL346083	2625585	Residences	Doorknob	Indoor	NA	22.3357	114.174	Aboveground (closed area)	Indoor surface	Door knob	Metal	28.5	79	2017 July	Other	NA	residence 4 door knob day 4 day	Residence 4	SRS7581820
SL346092	2017021	Residences	Doorknob	Indoor	NA	22.3355	114.174	Aboveground (closed area)	Indoor surface	Door knob	Metal	29.7	80	2017 July	Other	NA	residence 4 door knob day 6 day	Residence 4	SRS7581830
SL346101	1197184	Residences	Doorknob	Indoor	NA	22.3356	114.174	Aboveground (closed area)	Indoor surface	Door knob	Metal	28.2	87	2017 July	Other	NA	residence 4 door knob day 3 night	Residence 4	SRS7581840
SL346103	2962234	Residences	Doorknob	Indoor	NA	22.3717	114.185	Aboveground (closed area)	Indoor surface	Door knob	Metal	NA	NA	2017 July	Other	NA	res 2 door knob day 9 day	Residence 2	SRS7581842
SL346104	1818470	Residences	Doorknob	Indoor	NA	22.3357	114.174	Aboveground (closed area)	Indoor surface	Door knob	Metal	28.3	84	2017 July	Other	NA	residence 4 door knob day 6 night	Residence 4	SRS7581843
SL346111	2313754	Residences	Doorknob	Indoor	NA	22.3717	114.185	Aboveground (closed area)	Indoor surface	Door knob	Metal	NA	NA	2017 July	Other	NA	res 2 door knob day 10 night	Residence 2	SRS7581850
SL346122	2100965	Residences	Doorknob	Indoor	NA	22.3352	114.174	Aboveground (closed area)	Indoor surface	Door knob	Metal	27.3	94	2017 July	Other	NA	residence 4 door knob day 5 night	Residence 4	SRS7581860
SL346154	2388105	Residences	Doorknob	Indoor	NA	22.3354	114.174	Aboveground (closed area)	Indoor surface	Door knob	Metal	26.9	95	2017 July	Other	NA	residence 4 door knob day 3 day	Residence 4	SRS7581889
SL346155	1630817	Residences	Doorknob	Indoor	NA	22.3357	114.174	Aboveground (closed area)	Indoor surface	Door knob	Metal	28.7	84	2017 July	Other	NA	residence 4 door knob day 7 night	Residence 4	SRS7581888
SL346162	2046758	Residences	Doorknob	Indoor	NA	22.3358	114.174	Aboveground (closed area)	Indoor surface	Door knob	Metal	30.4	76	2017 July	Other	NA	residence 4 door knob day 9 day	Residence 4	SRS7581898
SL346164	1248858	Residences	Doorknob	Indoor	NA	22.3355	114.174	Aboveground (closed area)	Indoor surface	Door knob	Metal	28.9	83	2017 July	Other	NA	residence 4 door knob day 8 night	Residence 4	SRS7581901
SL345440	4893680	Piers	Bollard	Outdoor	Wu Kai Sha	22.4309	114.237	Aboveground (open area)	Pier surface	Bollard	Concrete	29	76	2017 July 2	NA	NA	NA	NA	SRS8735480
SL345441	2382140	Piers	Bollard	Outdoor	Wu Kai Sha	22.4309	114.237	Aboveground (open area)	Pier surface	Bollard	Concrete	29	76	2017 July 2	NA	NA	NA	NA	SRS8735481
SL345442	5754207	Piers	Bollard	Outdoor	Wu Kai Sha	22.431	114.238	Aboveground (open area)	Pier surface	Bollard	Concrete	29	76	2017 July 2	NA	NA	NA	NA	SRS8735577
SL345443	6334148	Piers	Bollard	Outdoor	Wu Kai Sha	22.4309	114.237	Aboveground (open area)	Pier surface	Bollard	Concrete	29	76	2017 July 2	NA	NA	NA	NA	SRS8735588
SL345444	4772789	Piers	Bollard	Outdoor	Wu Kai Sha	22.431	114.237	Aboveground (open area)	Pier surface	Bollard	Concrete	29	76	2017 July 2	NA	NA	NA	NA	SRS8735599
SL345461	2639570	Piers	Bollard	Outdoor	Tai Mei Tuk	22.468	114.233	Aboveground (open area)	Pier surface	Bollard	Concrete	29	89	2017 July 2	NA	NA	NA	NA	SRS8735578
SL345462	2480259	Piers	Bollard	Outdoor	Tai Mei Tuk	22.4682	114.233	Aboveground (open area)	Pier surface	Bollard	Concrete	29	89	2017 July 2	NA	NA	NA	NA	SRS8735580
SL345463	1635031	Piers	Bollard	Outdoor	Tai Mei Tuk	22.468	114.233	Aboveground (open area)	Pier surface	Bollard	Concrete	29	89	2017 July 2	NA	NA	NA	NA	SRS8735579
SL345464	3420762	Piers	Bollard	Outdoor	Tai Mei Tuk	22.4681	114.233	Aboveground (open area)	Pier surface	Bollard	Concrete	29	89	2017 July 2	NA	NA	NA	NA	SRS8735581
SL345480	4184267	Piers	Bollard	Outdoor	Sai Kung	22.3822	114.275	Aboveground (open area)	Pier surface	Bollard	Concrete	29	79	2017 July 2	NA	NA	NA	NA	SRS8735597
SL345481	2593192	Piers	Bollard	Outdoor	Sai Kung	22.3815	114.274	Aboveground (open area)	Pier surface	Bollard	Concrete	29	79	2017 July 2	NA	NA	NA	NA	SRS8735600
SL345482	3287770	Piers	Bollard	Outdoor	Sai Kung	22.3818	114.274	Aboveground (open area)	Pier surface	Bollard	Concrete	29	79	2017 July 2	NA	NA	NA	NA	SRS8735601
SL345483	3291492	Piers	Bollard	Outdoor	Sai Kung	22.3819	114.274	Aboveground (open area)	Pier surface	Bollard	Concrete	29	79	2017 July 2	NA	NA	NA	NA	SRS8735602
SL345484	3595542	Piers	Bollard	Outdoor	Sai Kung	22.3815	114.275	Aboveground (open area)	Pier surface	Bollard	Concrete	29	79	2017 July 2	NA	NA	NA	NA	SRS8735604
SL345500	1338124	Piers	Bollard	Outdoor	Tuen Mun	22.3719	113.966	Aboveground (open area)	Pier surface	Bollard	Concrete	31	69	2017 July 1	NA	NA	NA	NA	SRS8735621
SL345501	1564195	Piers	Bollard	Outdoor	Tuen Mun	22.3712	113.966	Aboveground (open area)	Pier surface	Bollard	Concrete	31	69	2017 July 1	NA	NA	NA	NA	SRS8735622
SL345502	484057	Piers	Bollard	Outdoor	Tuen Mun	22.3712	113.966	Aboveground (open area)	Pier surface	Bollard	Concrete	31	69	2017 July 1	NA	NA	NA	NA	SRS8735623
SL345503	662666	Piers	Bollard	Outdoor	Tuen Mun	22.3711	113.966	Aboveground (open area)	Pier surface	Bollard	Concrete	31	69	2017 July 1	NA	NA	NA	NA	SRS8735624
SL345504	1017263	Piers	Bollard	Outdoor	Tuen Mun	22.3712	113.966	Aboveground (open area)	Pier surface	Bollard	Concrete	31	69	2017 July 1	NA	NA	NA	NA	SRS8735625
SL345520	5198528	Piers	Bollard	Outdoor	Peng Chau	22.2844	114.038	Aboveground (open area)	Pier surface	Bollard	Concrete	33.1	70	2017 June 30	NA	NA	NA	NA	SRS8735643
SL345521	4844182	Piers	Bollard	Outdoor	Peng Chau	22.2842	114.038	Aboveground (open area)	Pier surface	Bollard	Concrete	33.1	70	2017 June 30	NA	NA	NA	NA	SRS8735644
SL345522	3729119	Piers	Bollard	Outdoor	Peng Chau	22.2842	114.038	Aboveground (open area)	Pier surface	Bollard	Concrete	33.1	70	2017 June 30	NA	NA	NA	NA	SRS8735646
SL345523	3188390	Piers	Bollard	Outdoor	Peng Chau	22.2844	114.038	Aboveground (open area)	Pier surface	Bollard	Concrete	33.1	70	2017 June 30	NA	NA	NA	NA	SRS8735645
SL345524	3633969	Piers	Bollard	Outdoor	Peng Chau	22.2844	114.038	Aboveground (open area)	Pier surface	Bollard	Concrete	33.1	70	2017 June 30	NA	NA	NA	NA	SRS8735647
SL345552	1995905	Piers	Bollard	Outdoor	Cheung Chau	22.2085	114.028	Aboveground (open area)	Pier surface	Bollard	Concrete	31.7	75	2017 June 29	NA	NA	NA	NA	SRS8735495
SL345553	2256360	Piers	Bollard	Outdoor	Cheung Chau	22.2081	114.029	Aboveground (open area)	Pier surface	Bollard	Concrete	31.7	75	2017 June 29	NA	NA	NA	NA	SRS8735496
SL345554	3387398	Piers	Bollard	Outdoor	Cheung Chau	22.2079	114.028	Aboveground (open area)	Pier surface	Bollard	Concrete	31.7	75	2017 June 29	NA	NA	NA	NA	SRS8735497
SL345555	2990349	Piers	Bollard	Outdoor	Cheung Chau	22.2082	114.028	Aboveground (open area)	Pier surface	Bollard	Concrete	31.7	75	2017 June 29	NA	NA	NA	NA	SRS8735498
SL345556	2698106	Piers	Bollard	Outdoor	Cheung Chau	22.2081	114.028	Aboveground (open area)	Pier surface	Bollard	Concrete	31.7	75	2017 June 29	NA	NA	NA	NA	SRS8735499
SL345558	3804688	Piers	Bollard	Outdoor	Sai Wan Ho	22.2892	114.219	Aboveground (open area)	Pier surface	Bollard	Concrete	32.1	65	2017 July 1	NA	NA	NA	NA	SRS8735501
SL345566	3165588	Piers	Bollard	Outdoor	Sai Wan Ho	22.2892	114.22	Aboveground (open area)	Pier surface	Bollard	Concrete	32.1	65	2017 July 1	NA	NA	NA	NA	SRS8735510
SL345574	3540671	Piers	Bollard	Outdoor	Sai Wan Ho	22.2894	114.219	Aboveground (open area)	Pier surface	Bollard	Concrete	32.1	65	2017 July 1	NA	NA	NA	NA	SRS8735519
SL345582	2740096	Piers	Bollard	Outdoor	Sai Wan Ho	22.2892	114.219	Aboveground (open area)	Pier surface	Bollard	Concrete	32.1	65	2017 July 1	NA	NA	NA	NA	SRS8735527
SL345585	4595039	Piers	Bollard	Outdoor	Yung Shue Wan	22.2263	114.109	Aboveground (open area)	Pier surface	Bollard	Concrete	30.1	80	2017 June 29	NA	NA	NA	NA	SRS8735530
SL345586	3233374	Piers	Bollard	Outdoor	Yung Shue Wan	22.2262	114.109	Aboveground (open area)	Pier surface	Bollard	Concrete	30.1	80	2017 June 29	NA	NA	NA	NA	SRS8735531
SL345587	3056849	Piers	Bollard	Outdoor	Yung Shue Wan	22.2263	114.109	Aboveground (open area)	Pier surface	Bollard	Concrete	30.1	80	2017 June 29	NA	NA	NA	NA	SRS8735532
SL345588	2719802	Piers	Bollard	Outdoor	Yung Shue Wan	22.226	114.109	Aboveground (open area)	Pier surface	Bollard	Concrete	30.1	80	2017 June 29	NA	NA	NA	NA	SRS8735533
SL345590	2645085	Piers	Bollard	Outdoor	Sai Wan Ho	22.2894	114.22	Aboveground (open area)	Pier surface	Bollard	Concrete	32.1	65	2017 July 1	NA	NA	NA	NA	SRS8735535
SL345592	4284729	Piers	Bollard	Outdoor	Yung Shue Wan	22.2262	114.109	Aboveground (open area)	Pier surface	Bollard	Concrete	30.1	80	2017 June 29	NA	NA	NA	NA	SRS8735538
SL345615	1989425	Piers	Bollard	Outdoor	Tai O	22.2523	113.861	Aboveground (open area)	Pier surface	Bollard	Concrete	31.4	74	2017 July 2	NA	NA	NA	NA	SRS8735562
SL310935	3848481	Subways	Air	Outdoor	Kowloon Tong	22.3372	114.176	Aboveground	Subway air	Air	Air	NA	NA	2017 July 14	NA	NA	NA	NA	SRS5292559
SL310936	3892266	Subways	Air	Outdoor	Tai Wai	22.373	114.179	Aboveground	Subway air	Air	Air	NA	NA	2017 July 14	NA	NA	NA	NA	SRS5292558
SL310937	2661122	Subways	Air	Outdoor	Che Kung Temple	22.3748	114.186	Aboveground	Subway air	Air	Air	NA	NA	2017 July 14	NA	NA	NA	NA	SRS5292561
SL310938	316988	Subways	Air	Outdoor	Sha Tin Wai	22.3769	114.195	Aboveground	Subway air	Air	Air	NA	NA	2017 July 14	NA	NA	NA	NA	SRS5292560
SL310939	2545948	Subways	Air	Indoor	Shek Kip Mei	22.332	114.169	Underground	Subway air	Air	Air	NA	NA	2017 July 14	NA	NA	NA	NA	SRS5292553
SL310940	2059590	Subways	Air	Indoor	Prince Edward	22.3251	114.168	Underground	Subway air	Air	Air	NA	NA	2017 July 14	NA	NA	NA	NA	SRS5292552
SL310941	3139614	Subways	Air	Indoor	Sham Shui Po	22.3313	114.162	Underground	Subway air	Air	Air	NA	NA	2017 July 14	NA	NA	NA	NA	SRS5292504
SL310942	1361870	Subways	Air	Indoor	Cheung Sha Wan	22.3358	114.156	Underground	Subway air	Air	Air	NA	NA	2017 July 14	NA	NA	NA	NA	SRS5292508
SL310943	2686941	Subways	Air	Indoor	Lai King	22.3487	114.126	Underground	Subway air	Air	Air	NA	NA	2017 July 14	NA	NA	NA	NA	SRS5292500
SL310944	2329258	Subways	Air	Indoor	Tsing Yi	22.3592	114.107	Underground	Subway air	Air	Air	NA	NA	2017 July 14	NA	NA	NA	NA	SRS5292502
SL310945	3291176	Subways	Air	Indoor	Yau Tong	22.2987	114.237	Underground	Subway air	Air	Air	NA	NA	2017 July 14	NA	NA	NA	NA	SRS5292524
SL310946	3087821	Subways	Air	Indoor	Quarry Bay	22.2884	114.21	Underground	Subway air	Air	Air	NA	NA	2017 July 14	NA	NA	NA	NA	SRS5292529
SL310947	3608310	Subways	Air	Indoor	North Point	22.2914	114.2	Underground	Subway air	Air	Air	NA	NA	2017 July 14	NA	NA	NA	NA	SRS5292474
SL310948	2994519	Subways	Air	Indoor	Fortress Hill	22.2885	114.194	Underground	Subway air	Air	Air	NA	NA	2017 July 14	NA	NA	NA	NA	SRS5292589
SL310949	2826351	Subways	Air	Outdoor	Ocean Park	22.2491	114.175	Aboveground	Subway air	Air	Air	NA	NA	2017 July 14	NA	NA	NA	NA	SRS5292507
SL310950	3438417	Subways	Air	Indoor	Admiralty	22.2797	114.165	Underground	Subway air	Air	Air	NA	NA	2017 July 14	NA	NA	NA	NA	SRS5292485
SL310951	2599525	Subways	Air	Indoor	Tsim Sha Tsui	22.2979	114.172	Underground	Subway air	Air	Air	NA	NA	2017 July 14	NA	NA	NA	NA	SRS5292628
SL310952	3104693	Subways	Air	Indoor	East Tsim Sha Tsui	22.2953	114.174	Underground	Subway air	Air	Air	NA	NA	2017 July 14	NA	NA	NA	NA	SRS5292627
SL310953	3373601	Subways	Air	Indoor	Hung Hom	22.3036	114.181	Aboveground	Subway air	Air	Air	NA	NA	2017 July 14	NA	NA	NA	NA	SRS5292626
SL310954	4224083	Subways	Air	Indoor	Mong Kok East	22.3226	114.172	Aboveground	Subway air	Air	Air	NA	NA	2017 July 14	NA	NA	NA	NA	SRS5292625
SL310955	3958741	Subways	Air	Outdoor	Kowloon Tong	22.3372	114.176	Aboveground	Subway air	Air	Air	NA	NA	2017 July 14	NA	NA	NA	NA	SRS5292632
SL310956	1759101	Subways	Air	Outdoor	Tai Wai	22.373	114.179	Aboveground	Subway air	Air	Air	NA	NA	2017 July 14	NA	NA	NA	NA	SRS5292631
SL310957	754898	Subways	Air	Outdoor	Che Kung Temple	22.3748	114.186	Aboveground	Subway air	Air	Air	NA	NA	2017 July 14	NA	NA	NA	NA	SRS5292630
SL310958	1279036	Subways	Air	Outdoor	Sha Tin Wai	22.3769	114.195	Aboveground	Subway air	Air	Air	NA	NA	2017 July 14	NA	NA	NA	NA	SRS5292629
SL310959	2444256	Subways	Air	Indoor	Shek Kip Mei	22.332	114.169	Underground	Subway air	Air	Air	NA	NA	2017 July 14	NA	NA	NA	NA	SRS5292634
SL310960	2247597	Subways	Air	Indoor	Prince Edward	22.3251	114.168	Underground	Subway air	Air	Air	NA	NA	2017 July 14	NA	NA	NA	NA	SRS5292633
SL310961	1606232	Subways	Air	Indoor	Sham Shui Po	22.3313	114.162	Underground	Subway air	Air	Air	NA	NA	2017 July 14	NA	NA	NA	NA	SRS5292605
SL310962	1835188	Subways	Air	Indoor	Cheung Sha Wan	22.3358	114.156	Underground	Subway air	Air	Air	NA	NA	2017 July 14	NA	NA	NA	NA	SRS5292606
SL310963	1086894	Subways	Air	Indoor	Lai King	22.3487	114.126	Underground	Subway air	Air	Air	NA	NA	2017 July 14	NA	NA	NA	NA	SRS5292607
SL310964	2822857	Subways	Air	Indoor	Tsing Yi	22.3592	114.107	Underground	Subway air	Air	Air	NA	NA	2017 July 14	NA	NA	NA	NA	SRS5292608
SL310965	2002985	Subways	Air	Indoor	Yau Tong	22.2987	114.237	Underground	Subway air	Air	Air	NA	NA	2017 July 14	NA	NA	NA	NA	SRS5292601
SL310966	2909681	Subways	Air	Indoor	Quarry Bay	22.2884	114.21	Underground	Subway air	Air	Air	NA	NA	2017 July 14	NA	NA	NA	NA	SRS5292602
SL310967	2919011	Subways	Air	Indoor	North Point	22.2914	114.2	Underground	Subway air	Air	Air	NA	NA	2017 July 14	NA	NA	NA	NA	SRS5292603
SL310968	1650330	Subways	Air	Indoor	Fortress Hill	22.2885	114.194	Underground	Subway air	Air	Air	NA	NA	2017 July 14	NA	NA	NA	NA	SRS5292604
SL310969	2771474	Subways	Air	Outdoor	Ocean Park	22.2491	114.175	Aboveground	Subway air	Air	Air	NA	NA	2017 July 14	NA	NA	NA	NA	SRS5292610
SL310970	3611996	Subways	Air	Indoor	Admiralty	22.2797	114.165	Underground	Subway air	Air	Air	NA	NA	2017 July 14	NA	NA	NA	NA	SRS5292611
SL310971	3492929	Subways	Air	Indoor	Tsim Sha Tsui	22.2979	114.172	Underground	Subway air	Air	Air	NA	NA	2017 July 14	NA	NA	NA	NA	SRS5292448
SL310972	1931902	Subways	Air	Indoor	East Tsim Sha Tsui	22.2953	114.174	Underground	Subway air	Air	Air	NA	NA	2017 July 14	NA	NA	NA	NA	SRS5292447
SL310973	2731025	Subways	Air	Indoor	Hung Hom	22.3036	114.181	Aboveground	Subway air	Air	Air	NA	NA	2017 July 14	NA	NA	NA	NA	SRS5292450
SL310974	3229700	Subways	Air	Indoor	Mong Kok East	22.3226	114.172	Aboveground	Subway air	Air	Air	NA	NA	2017 July 14	NA	NA	NA	NA	SRS5292449
SL310975	4318510	Subways	Air	Outdoor	Kowloon Tong	22.3372	114.176	Aboveground	Subway air	Air	Air	NA	NA	2017 July 14	NA	NA	NA	NA	SRS5292444
SL310976	3492411	Subways	Air	Outdoor	Tai Wai	22.373	114.179	Aboveground	Subway air	Air	Air	NA	NA	2017 July 14	NA	NA	NA	NA	SRS5292443
SL310977	2644020	Subways	Air	Outdoor	Che Kung Temple	22.3748	114.186	Aboveground	Subway air	Air	Air	NA	NA	2017 July 14	NA	NA	NA	NA	SRS5292446
SL310978	3723480	Subways	Air	Outdoor	Sha Tin Wai	22.3769	114.195	Aboveground	Subway air	Air	Air	NA	NA	2017 July 14	NA	NA	NA	NA	SRS5292445
SL310979	3419307	Subways	Air	Indoor	Shek Kip Mei	22.332	114.169	Underground	Subway air	Air	Air	NA	NA	2017 July 14	NA	NA	NA	NA	SRS5292454
SL310980	3053681	Subways	Air	Indoor	Prince Edward	22.3251	114.168	Underground	Subway air	Air	Air	NA	NA	2017 July 14	NA	NA	NA	NA	SRS5292453
SL310981	3588981	Subways	Air	Indoor	Sham Shui Po	22.3313	114.162	Underground	Subway air	Air	Air	NA	NA	2017 July 14	NA	NA	NA	NA	SRS5292671
SL310982	2274775	Subways	Air	Indoor	Cheung Sha Wan	22.3358	114.156	Underground	Subway air	Air	Air	NA	NA	2017 July 14	NA	NA	NA	NA	SRS5292672
SL310983	2919710	Subways	Air	Indoor	Lai King	22.3487	114.126	Underground	Subway air	Air	Air	NA	NA	2017 July 14	NA	NA	NA	NA	SRS5292669
SL310984	2839664	Subways	Air	Indoor	Tsing Yi	22.3592	114.107	Underground	Subway air	Air	Air	NA	NA	2017 July 14	NA	NA	NA	NA	SRS5292670
SL310985	3069629	Subways	Air	Indoor	Yau Tong	22.2987	114.237	Underground	Subway air	Air	Air	NA	NA	2017 July 14	NA	NA	NA	NA	SRS5292667
SL310986	1518463	Subways	Air	Indoor	Quarry Bay	22.2884	114.21	Underground	Subway air	Air	Air	NA	NA	2017 July 14	NA	NA	NA	NA	SRS5292541
SL310987	3515132	Subways	Air	Indoor	North Point	22.2914	114.2	Underground	Subway air	Air	Air	NA	NA	2017 July 14	NA	NA	NA	NA	SRS5292665
SL310988	3057308	Subways	Air	Indoor	Fortress Hill	22.2885	114.194	Underground	Subway air	Air	Air	NA	NA	2017 July 14	NA	NA	NA	NA	SRS5292666
SL310989	3525109	Subways	Air	Outdoor	Ocean Park	22.2491	114.175	Aboveground	Subway air	Air	Air	NA	NA	2017 July 14	NA	NA	NA	NA	SRS5292674
SL310990	3142728	Subways	Air	Indoor	Admiralty	22.2797	114.165	Underground	Subway air	Air	Air	NA	NA	2017 July 14	NA	NA	NA	NA	SRS5292675
SL310991	2766014	Subways	Air	Indoor	Tsim Sha Tsui	22.2979	114.172	Underground	Subway air	Air	Air	NA	NA	2017 July 14	NA	NA	NA	NA	SRS5292664
SL310992	2220355	Subways	Air	Indoor	East Tsim Sha Tsui	22.2953	114.174	Underground	Subway air	Air	Air	NA	NA	2017 July 14	NA	NA	NA	NA	SRS5292615
SL310993	2834481	Subways	Air	Indoor	Hung Hom	22.3036	114.181	Aboveground	Subway air	Air	Air	NA	NA	2017 July 14	NA	NA	NA	NA	SRS5292612
SL310994	839633	Subways	Air	Indoor	Mong Kok East	22.3226	114.172	Aboveground	Subway air	Air	Air	NA	NA	2017 July 14	NA	NA	NA	NA	SRS5292609
SL310995	2976170	Subways	Air	Outdoor	Kowloon Tong	22.3372	114.176	Aboveground	Subway air	Air	Air	NA	NA	2017 July 14	NA	NA	NA	NA	SRS5292523
SL310996	3578035	Subways	Air	Outdoor	Tai Wai	22.373	114.179	Aboveground	Subway air	Air	Air	NA	NA	2017 July 14	NA	NA	NA	NA	SRS5292501
SL310997	3352590	Subways	Air	Outdoor	Che Kung Temple	22.3748	114.186	Aboveground	Subway air	Air	Air	NA	NA	2017 July 14	NA	NA	NA	NA	SRS5292592
SL310998	3153878	Subways	Air	Outdoor	Sha Tin Wai	22.3769	114.195	Aboveground	Subway air	Air	Air	NA	NA	2017 July 14	NA	NA	NA	NA	SRS5292470
SL310999	2214162	Subways	Air	Indoor	Shek Kip Mei	22.332	114.169	Underground	Subway air	Air	Air	NA	NA	2017 July 14	NA	NA	NA	NA	SRS5292476
SL311000	3253540	Subways	Air	Indoor	Prince Edward	22.3251	114.168	Underground	Subway air	Air	Air	NA	NA	2017 July 14	NA	NA	NA	NA	SRS5292475
SL311001	2557061	Subways	Air	Indoor	Sham Shui Po	22.3313	114.162	Underground	Subway air	Air	Air	NA	NA	2017 July 14	NA	NA	NA	NA	SRS5292711
SL311002	2590828	Subways	Air	Indoor	Cheung Sha Wan	22.3358	114.156	Underground	Subway air	Air	Air	NA	NA	2017 July 14	NA	NA	NA	NA	SRS5292712
SL311003	1912620	Subways	Air	Indoor	Lai King	22.3487	114.126	Underground	Subway air	Air	Air	NA	NA	2017 July 14	NA	NA	NA	NA	SRS5292713
SL311004	2140987	Subways	Air	Indoor	Tsing Yi	22.3592	114.107	Underground	Subway air	Air	Air	NA	NA	2017 July 14	NA	NA	NA	NA	SRS5292714
SL311005	2087659	Subways	Air	Indoor	Yau Tong	22.2987	114.237	Underground	Subway air	Air	Air	NA	NA	2017 July 14	NA	NA	NA	NA	SRS5292715
SL311006	2680478	Subways	Air	Indoor	Quarry Bay	22.2884	114.21	Underground	Subway air	Air	Air	NA	NA	2017 July 14	NA	NA	NA	NA	SRS5292716
SL311007	4012525	Subways	Air	Indoor	North Point	22.2914	114.2	Underground	Subway air	Air	Air	NA	NA	2017 July 14	NA	NA	NA	NA	SRS5292717
SL311008	2249474	Subways	Air	Indoor	Fortress Hill	22.2885	114.194	Underground	Subway air	Air	Air	NA	NA	2017 July 14	NA	NA	NA	NA	SRS5292718
SL311009	4526539	Subways	Air	Outdoor	Ocean Park	22.2491	114.175	Aboveground	Subway air	Air	Air	NA	NA	2017 July 14	NA	NA	NA	NA	SRS5292719
SL311010	4095770	Subways	Air	Indoor	Admiralty	22.2797	114.165	Underground	Subway air	Air	Air	NA	NA	2017 July 14	NA	NA	NA	NA	SRS5292720
SL311011	4269586	Subways	Air	Indoor	Tsim Sha Tsui	22.2979	114.172	Underground	Subway air	Air	Air	NA	NA	2017 July 14	NA	NA	NA	NA	SRS5292579
SL311012	2239921	Subways	Air	Indoor	East Tsim Sha Tsui	22.2953	114.174	Underground	Subway air	Air	Air	NA	NA	2017 July 14	NA	NA	NA	NA	SRS5292578
SL311013	4151785	Subways	Air	Indoor	Hung Hom	22.3036	114.181	Aboveground	Subway air	Air	Air	NA	NA	2017 July 14	NA	NA	NA	NA	SRS5292581
SL311014	4882894	Subways	Air	Indoor	Mong Kok East	22.3226	114.172	Aboveground	Subway air	Air	Air	NA	NA	2017 July 14	NA	NA	NA	NA	SRS5292580

## Sheet: S2
Table S2. Information about the 1,174 high-quality viral genomes.
Genome id	Genome length	Provirus	Proviral length	Gene count	Viral genes	Host genes	Checkv quality	Miuvig quality	Completeness	Completeness method	Contamination	Life cycle
SL310935_c_000000000001	16241	No	NA	7	1	0	Complete	High-quality	100	DTR (high-confidence)	0
SL310935_c_000000000009	10904	No	NA	7	1	0	High-quality	High-quality	100	HMM-based (lower-bound)	0
SL310935_c_000000000028	6226	No	NA	3	1	0	Medium-quality	Genome-fragment	58.04	HMM-based (lower-bound)	0
SL310935_c_000000000041	5559	No	NA	2	1	0	Medium-quality	Genome-fragment	51.83	HMM-based (lower-bound)	0
SL310935_c_000000000044	5474	No	NA	7	1	0	Medium-quality	Genome-fragment	51.03	HMM-based (lower-bound)	0
SL310935_c_000000000047	5442	No	NA	2	1	0	Medium-quality	Genome-fragment	50.74	HMM-based (lower-bound)	0
SL310935_c_000000000054	5246	No	NA	2	1	0	Medium-quality	Genome-fragment	51.39	HMM-based (lower-bound)	0
SL310936_c_000000000311	6124	No	NA	9	1	0	Medium-quality	Genome-fragment	57.09	HMM-based (lower-bound)	0
SL310937_c_000000000056	7475	No	NA	7	1	0	Medium-quality	Genome-fragment	69.69	HMM-based (lower-bound)	0
SL310941_c_000000000100__full	7493	No	NA	7	6	0	High-quality	High-quality	92.96	HMM-based (lower-bound)	0
SL310948_c_000000002895__full	1744	No	NA	3	2	0	Medium-quality	Genome-fragment	75.56	HMM-based (lower-bound)	0
SL310952_c_000000000001__full	41230	No	NA	61	30	1	Medium-quality	Genome-fragment	65.9	HMM-based (lower-bound)	0
SL310959_c_000000000010__full	14939	No	NA	17	13	0	Medium-quality	Genome-fragment	78.85	HMM-based (lower-bound)	0
SL310959_c_000000002250__full	2117	No	NA	3	3	0	High-quality	High-quality	91.71	HMM-based (lower-bound)	0
SL310962_c_000000000001__full	45406	No	NA	68	19	2	Medium-quality	Genome-fragment	58.78	HMM-based (lower-bound)	0
SL310969_c_000000000001__full	35303	No	NA	63	15	1	Medium-quality	Genome-fragment	55.03	HMM-based (lower-bound)	0
SL310974_c_000000000223__full	7538	No	NA	7	7	0	Complete	High-quality	100	DTR (high-confidence)	0
SL310978_c_000000001112__full	3163	No	NA	5	1	0	Medium-quality	Genome-fragment	76.01	HMM-based (lower-bound)	0
SL310987_c_000000000022__full	7509	No	NA	7	7	0	Complete	High-quality	100	DTR (high-confidence)	0
SL310989_c_000000000002__full	35264	No	NA	62	15	1	Medium-quality	Genome-fragment	54.96	HMM-based (lower-bound)	0
SL310993_c_000000004617	1230	No	NA	2	1	0	Medium-quality	Genome-fragment	53.48	HMM-based (lower-bound)	0
SL310994_c_000000000011__full	2381	No	NA	5	3	0	Complete	High-quality	100	DTR (high-confidence)	0
SL310998_c_000000000001	73258	No	NA	73	1	48	Medium-quality	Genome-fragment	55.02	HMM-based (lower-bound)	0
SL311007_c_000000000168	6769	No	NA	2	1	0	Medium-quality	Genome-fragment	63.11	HMM-based (lower-bound)	0
SL311007_c_000000000213	6356	No	NA	1	1	0	Medium-quality	Genome-fragment	59.26	HMM-based (lower-bound)	0
SL311009_c_000000000002__full	41521	No	NA	61	14	0	Medium-quality	Genome-fragment	75.35	HMM-based (lower-bound)	0	Lysogenic
SL311009_c_000000000003__full	40701	No	NA	59	25	0	Medium-quality	Genome-fragment	50.35	HMM-based (lower-bound)	0
SL311009_c_000000000005__full	35430	No	NA	63	15	1	Medium-quality	Genome-fragment	55.22	HMM-based (lower-bound)	0
SL336563_c_000000000001__full	131935	No	NA	226	76	3	Complete	High-quality	100	DTR (high-confidence)	0
SL336563_c_000000000002	120258	No	NA	116	1	75	High-quality	High-quality	100	HMM-based (lower-bound)	0
SL336563_c_000000000014	57900	No	NA	49	2	36	Medium-quality	Genome-fragment	51.21	HMM-based (lower-bound)	0
SL336563_c_000000000018__full	49353	No	NA	75	34	0	Medium-quality	Genome-fragment	67.89	HMM-based (lower-bound)	0	Lysogenic
SL336563_c_000000000019__full	44025	No	NA	60	31	0	Medium-quality	Genome-fragment	64.76	HMM-based (lower-bound)	0	Lysogenic
SL336563_c_000000000021__full	42864	No	NA	70	29	0	Medium-quality	Genome-fragment	57.46	HMM-based (lower-bound)	0	Lysogenic
SL336564_c_000000000001__full	131935	No	NA	227	77	3	Complete	High-quality	100	DTR (high-confidence)	0
SL336564_c_000000000013__full	48496	No	NA	72	33	0	Medium-quality	Genome-fragment	67.6	HMM-based (lower-bound)	0	Lysogenic
SL336568_c_000000000001	226881	No	NA	217	1	157	High-quality	High-quality	100	HMM-based (lower-bound)	0
SL336568_c_000000000003__full	131935	No	NA	227	77	3	Complete	High-quality	100	DTR (high-confidence)	0
SL336568_c_000000000005	129203	No	NA	120	1	102	High-quality	High-quality	100	HMM-based (lower-bound)	0
SL336568_c_000000000028__full	48496	No	NA	72	33	0	Medium-quality	Genome-fragment	67.6	HMM-based (lower-bound)	0	Lysogenic
SL336568_c_000000000029__full	47134	No	NA	73	20	1	Medium-quality	Genome-fragment	76.64	HMM-based (lower-bound)	0	Lysogenic
SL336568_c_000000000039__full	41755	No	NA	59	31	0	Medium-quality	Genome-fragment	61.42	HMM-based (lower-bound)	0
SL336568_c_000000000047__full	39114	No	NA	69	22	0	Medium-quality	Genome-fragment	53.16	HMM-based (lower-bound)	0	Lysogenic
SL336568_c_000000000054__full	34981	No	NA	44	25	0	Medium-quality	Genome-fragment	52.11	HMM-based (lower-bound)	0
SL336569_c_000000000001__full	49211	No	NA	75	34	0	Medium-quality	Genome-fragment	67.72	HMM-based (lower-bound)	0	Lysogenic
SL336570_c_000000000003	227963	No	NA	217	1	158	High-quality	High-quality	100	HMM-based (lower-bound)	0
SL336570_c_000000000004	184889	No	NA	172	1	146	High-quality	High-quality	100	HMM-based (lower-bound)	0
SL336570_c_000000000019	92546	No	NA	81	2	60	Medium-quality	Genome-fragment	81.85	HMM-based (lower-bound)	0
SL336570_c_000000000036__0_partial	49541	Yes	42384	53	9	6	Medium-quality	Genome-fragment	55.4	HMM-based (lower-bound)	14.45	Lysogenic
SL336570_c_000000000059__full	48496	No	NA	72	33	0	Medium-quality	Genome-fragment	67.6	HMM-based (lower-bound)	0	Lysogenic
SL336570_c_000000000061__0_partial	38614	Yes	33932	38	13	5	Medium-quality	Genome-fragment	58.24	HMM-based (lower-bound)	12.13	Lysogenic
SL336570_c_000000000098__full	35171	No	NA	46	24	0	Medium-quality	Genome-fragment	52.46	HMM-based (lower-bound)	0	Lysogenic
SL336570_c_000000000107__full	33177	No	NA	52	14	1	Medium-quality	Genome-fragment	61.22	HMM-based (lower-bound)	0
SL336571_c_000000000001__full	28551	No	NA	42	42	0	Medium-quality	Genome-fragment	89.06	HMM-based (lower-bound)	0
SL336572_c_000000000330	6130	No	NA	1	1	0	Medium-quality	Genome-fragment	57.15	HMM-based (lower-bound)	0
SL336574_c_000000000001__full	49353	No	NA	74	34	0	Medium-quality	Genome-fragment	67.89	HMM-based (lower-bound)	0	Lysogenic
SL336575_c_000000000001__full	49353	No	NA	75	34	0	Medium-quality	Genome-fragment	67.89	HMM-based (lower-bound)	0	Lysogenic
SL336575_c_000000000015	6280	No	NA	3	1	0	Medium-quality	Genome-fragment	58.55	HMM-based (lower-bound)	0
SL336576_c_000000000029__full	3513	No	NA	6	3	0	Medium-quality	Genome-fragment	53.32	HMM-based (lower-bound)	0
SL336577_c_000000000001__full	49353	No	NA	75	34	0	Medium-quality	Genome-fragment	67.89	HMM-based (lower-bound)	0	Lysogenic
SL336578_c_000000000001__full	43721	No	NA	56	14	1	Medium-quality	Genome-fragment	54.64	HMM-based (lower-bound)	0
SL336578_c_000000000003__full	37510	No	NA	56	17	0	Medium-quality	Genome-fragment	51.17	HMM-based (lower-bound)	0	Lysogenic
SL336579_c_000000000005	60727	No	NA	70	1	45	Medium-quality	Genome-fragment	55.42	HMM-based (lower-bound)	0	Lysogenic
SL336579_c_000000000013__full	49353	No	NA	75	34	0	Medium-quality	Genome-fragment	67.89	HMM-based (lower-bound)	0	Lysogenic
SL336582_c_000000000003	57986	No	NA	65	4	7	Medium-quality	Genome-fragment	52.77	HMM-based (lower-bound)	0
SL336582_c_000000000009__full	49353	No	NA	75	34	0	Medium-quality	Genome-fragment	67.89	HMM-based (lower-bound)	0	Lysogenic
SL336583_c_000000000001	434691	No	NA	413	1	265	High-quality	High-quality	100	HMM-based (lower-bound)	0	Lysogenic
SL336583_c_000000000003	262785	No	NA	266	3	174	High-quality	High-quality	100	HMM-based (lower-bound)	0
SL336583_c_000000000005	202628	No	NA	204	4	147	High-quality	High-quality	100	HMM-based (lower-bound)	0
SL336583_c_000000000006	167058	No	NA	173	1	129	High-quality	High-quality	100	HMM-based (lower-bound)	0
SL336583_c_000000000010	111986	No	NA	119	2	81	Medium-quality	Genome-fragment	87.81	HMM-based (lower-bound)	0
SL336583_c_000000000011	110131	No	NA	108	1	72	High-quality	High-quality	96.18	HMM-based (lower-bound)	0
SL336583_c_000000000031	62013	No	NA	71	6	7	Medium-quality	Genome-fragment	56.69	HMM-based (lower-bound)	0
SL336583_c_000000000042__full	49353	No	NA	75	34	0	Medium-quality	Genome-fragment	67.89	HMM-based (lower-bound)	0	Lysogenic
SL336584_c_000000000001	60599	No	NA	68	5	7	Medium-quality	Genome-fragment	57.96	HMM-based (lower-bound)	0
SL336584_c_000000000003__full	48627	No	NA	72	33	0	Medium-quality	Genome-fragment	67.76	HMM-based (lower-bound)	0	Lysogenic
SL336585_c_000000000004__full	49353	No	NA	75	34	0	Medium-quality	Genome-fragment	67.89	HMM-based (lower-bound)	0	Lysogenic
SL336586_c_000000000001__full	131787	No	NA	227	77	3	High-quality	High-quality	97.02	HMM-based (lower-bound)	0
SL336586_c_000000000006__full	49353	No	NA	75	34	0	Medium-quality	Genome-fragment	67.89	HMM-based (lower-bound)	0	Lysogenic
SL336587_c_000000000029	2692	No	NA	2	1	0	Medium-quality	Genome-fragment	64.69	HMM-based (lower-bound)	0
SL336588_c_000000000001	168991	No	NA	163	1	124	High-quality	High-quality	91.66	HMM-based (lower-bound)	0
SL336589_c_000000000001	515584	No	NA	477	5	337	Complete	High-quality	100	ITR (high-confidence)	0	Lysogenic
SL336589_c_000000000002	515394	No	NA	496	4	372	High-quality	High-quality	100	HMM-based (lower-bound)	0	Lysogenic
SL336589_c_000000000003	436751	No	NA	437	8	297	High-quality	High-quality	100	HMM-based (lower-bound)	0	Lysogenic
SL336589_c_000000000004	280882	No	NA	267	16	174	High-quality	High-quality	99.79	HMM-based (lower-bound)	0	Lysogenic
SL336589_c_000000000005	277924	No	NA	262	1	201	High-quality	High-quality	100	HMM-based (lower-bound)	0
SL336589_c_000000000006	272123	No	NA	261	5	179	High-quality	High-quality	100	HMM-based (lower-bound)	0
SL336589_c_000000000010	212661	No	NA	191	2	122	High-quality	High-quality	100	HMM-based (lower-bound)	0	Lysogenic
SL336589_c_000000000011	210207	No	NA	208	2	144	High-quality	High-quality	100	HMM-based (lower-bound)	0
SL336589_c_000000000012	208787	No	NA	194	4	146	High-quality	High-quality	100	HMM-based (lower-bound)	0
SL336589_c_000000000015	158901	No	NA	146	1	93	High-quality	High-quality	100	HMM-based (lower-bound)	0
SL336589_c_000000000017	133746	No	NA	132	2	87	Medium-quality	Genome-fragment	86.33	HMM-based (lower-bound)	0
SL336589_c_000000000018	129373	No	NA	130	2	88	High-quality	High-quality	100	HMM-based (lower-bound)	0
SL336589_c_000000000020	121136	No	NA	132	1	79	High-quality	High-quality	100	HMM-based (lower-bound)	0
SL336589_c_000000000022	104425	No	NA	98	1	55	High-quality	High-quality	91.2	HMM-based (lower-bound)	0
SL336589_c_000000000023	102570	No	NA	112	2	77	High-quality	High-quality	100	HMM-based (lower-bound)	0
SL336589_c_000000000025	98417	No	NA	93	2	70	Medium-quality	Genome-fragment	87.35	HMM-based (lower-bound)	0
SL336589_c_000000000027	85549	No	NA	86	6	54	High-quality	High-quality	99.93	HMM-based (lower-bound)	0
SL336589_c_000000000028	84419	No	NA	89	4	15	High-quality	High-quality	93.65	HMM-based (lower-bound)	0
SL336589_c_000000000030	68455	No	NA	72	6	49	Medium-quality	Genome-fragment	86.08	HMM-based (lower-bound)	0	Lysogenic
SL336589_c_000000000038	46007	No	NA	42	2	22	Medium-quality	Genome-fragment	53.62	HMM-based (lower-bound)	0	Lysogenic
SL336591_c_000000000245__full	7633	No	NA	9	1	0	High-quality	High-quality	100	HMM-based (lower-bound)	0
SL336591_c_000000001023__full	3549	No	NA	6	1	0	Complete	High-quality	100	DTR (medium-confidence)	0
SL336591_c_000000001146__full	3349	No	NA	5	1	0	Complete	High-quality	100	DTR (medium-confidence)	0
SL336592_c_000000000005__full	43350	No	NA	60	14	0	Medium-quality	High-quality	57.38	HMM-based (lower-bound)	0	Lysogenic
SL336593_c_000000000001__full	89777	No	NA	124	35	0	Medium-quality	Genome-fragment	69.63	HMM-based (lower-bound)	0	Lysogenic
SL336593_c_000000000004__full	29581	No	NA	43	10	0	Medium-quality	Genome-fragment	50.78	HMM-based (lower-bound)	0	Lysogenic
SL336600_c_000000000001	85462	No	NA	75	2	55	Medium-quality	Genome-fragment	77.6	HMM-based (lower-bound)	0
SL336600_c_000000000555__full	3549	No	NA	6	1	0	Complete	Genome-fragment	100	DTR (medium-confidence)	0
SL336600_c_000000001065__full	2560	No	NA	3	1	0	Medium-quality	Genome-fragment	61.52	HMM-based (lower-bound)	0
SL336603_c_000000000001__full	116734	No	NA	201	23	12	Complete	Genome-fragment	100	DTR (high-confidence)	0	Lysogenic
SL336608_c_000000000049__full	27854	No	NA	41	38	0	Medium-quality	Genome-fragment	87.13	HMM-based (lower-bound)	0
SL336614_c_000000000021__full	60714	No	NA	78	22	0	Medium-quality	High-quality	83	HMM-based (lower-bound)	0
SL336614_c_000000000038__full	44259	No	NA	46	28	0	Medium-quality	Genome-fragment	56.87	HMM-based (lower-bound)	0
SL336620_c_000000000001	301478	No	NA	272	1	194	High-quality	Genome-fragment	100	HMM-based (lower-bound)	0
SL336620_c_000000000004	231496	No	NA	206	2	152	High-quality	Genome-fragment	100	HMM-based (lower-bound)	0
SL336620_c_000000000005	209563	No	NA	180	1	144	High-quality	High-quality	100	HMM-based (lower-bound)	0
SL336620_c_000000000026	118711	No	NA	101	2	64	High-quality	Genome-fragment	93.76	HMM-based (lower-bound)	0	Lysogenic
SL336620_c_000000000043__full	83583	No	NA	108	36	1	Medium-quality	Genome-fragment	87.76	HMM-based (lower-bound)	0
SL336620_c_000000000093__full	42416	No	NA	45	17	0	Medium-quality	High-quality	57.7	HMM-based (lower-bound)	0
SL336620_c_000000000475__full	8200	No	NA	12	1	0	Complete	Genome-fragment	100	DTR (medium-confidence)	0	Lysogenic
SL336620_c_000000000605	6708	No	NA	11	1	0	Medium-quality	High-quality	67.38	HMM-based (lower-bound)	0
SL336622_c_000000000059__full	50700	Yes	36973	55	20	5	Medium-quality	Genome-fragment	83.97	HMM-based (lower-bound)	27.07	Lysogenic
SL336622_c_000000000560__full	8200	No	NA	12	1	0	Complete	Genome-fragment	100	DTR (medium-confidence)	0	Lysogenic
SL336622_c_000000000612__full	7621	Yes	4958	10	2	1	Medium-quality	High-quality	55.43	HMM-based (lower-bound)	34.94	Lysogenic
SL336626_c_000000000001__full	41126	No	NA	66	47	0	Complete	Genome-fragment	100	DTR (medium-confidence)	0
SL336627_c_000000000001	321203	No	NA	282	1	229	High-quality	Genome-fragment	100	HMM-based (lower-bound)	0
SL336627_c_000000000002	295150	No	NA	267	1	190	High-quality	Genome-fragment	100	HMM-based (lower-bound)	0
SL336627_c_000000000003	232845	No	NA	206	1	160	High-quality	Genome-fragment	100	HMM-based (lower-bound)	0
SL336627_c_000000000007	166533	No	NA	143	1	99	High-quality	Genome-fragment	100	HMM-based (lower-bound)	0
SL336627_c_000000000030__full	83602	No	NA	107	35	1	Medium-quality	Genome-fragment	87.76	HMM-based (lower-bound)	0
SL336627_c_000000000051__full	48681	No	NA	59	19	0	Medium-quality	High-quality	67.4	HMM-based (lower-bound)	0
SL336627_c_000000000079__full	37576	No	NA	48	22	0	Medium-quality	High-quality	57.96	HMM-based (lower-bound)	0
SL336627_c_000000000512__full	7918	No	NA	12	1	0	Medium-quality	Genome-fragment	79.54	HMM-based (lower-bound)	0	Lysogenic
SL336629_c_000000000008__full	14472	No	NA	23	11	0	Medium-quality	Genome-fragment	68.77	HMM-based (lower-bound)	0
SL336629_c_000000000480__full	3349	No	NA	4	1	0	Complete	Genome-fragment	100	DTR (medium-confidence)	0
SL336630_c_000000000500__full	2987	No	NA	3	1	0	Medium-quality	Genome-fragment	71.78	HMM-based (lower-bound)	0
SL336631_c_000000003106	1202	No	NA	1	1	0	Medium-quality	High-quality	50.63	HMM-based (lower-bound)	0
SL336634_c_000000000001	504172	No	NA	482	7	348	High-quality	Genome-fragment	100	HMM-based (lower-bound)	0	Lysogenic
SL336634_c_000000000005	210808	No	NA	181	1	144	High-quality	High-quality	100	HMM-based (lower-bound)	0
SL336634_c_000000000011	137840	No	NA	117	1	75	Medium-quality	High-quality	88.98	HMM-based (lower-bound)	0
SL336634_c_000000000030__full	83589	No	NA	108	35	1	Medium-quality	High-quality	87.76	HMM-based (lower-bound)	0
SL336634_c_000000000039__full	63279	No	NA	87	22	0	Medium-quality	Genome-fragment	85.69	HMM-based (lower-bound)	0
SL336634_c_000000000060__full	40147	No	NA	53	21	1	Medium-quality	Genome-fragment	62.07	HMM-based (lower-bound)	0	Lysogenic
SL336634_c_000000000351__full	8200	No	NA	12	1	0	Complete	Genome-fragment	100	DTR (medium-confidence)	0	Lysogenic
SL336634_c_000000000444	6900	No	NA	11	1	0	Medium-quality	Genome-fragment	69.31	HMM-based (lower-bound)	0
SL336636_c_000000000001__full	34039	No	NA	44	28	0	Medium-quality	Genome-fragment	68.96	HMM-based (lower-bound)	0
SL336642_c_000000000008	5426	No	NA	3	1	0	Medium-quality	Genome-fragment	50.59	HMM-based (lower-bound)	0
SL336643_c_000000000591__full	3549	No	NA	5	1	0	Complete	High-quality	100	DTR (medium-confidence)	0
SL336644_c_000000000012__full	83607	No	NA	108	35	1	Medium-quality	High-quality	87.77	HMM-based (lower-bound)	0
SL336644_c_000000000020__full	60170	No	NA	80	22	0	Medium-quality	Genome-fragment	82.36	HMM-based (lower-bound)	0
SL336644_c_000000000034__full	45351	No	NA	68	31	0	Medium-quality	Genome-fragment	55.08	HMM-based (lower-bound)	0
SL336644_c_000000000040__full	38257	No	NA	49	22	0	Medium-quality	Genome-fragment	58.72	HMM-based (lower-bound)	0
SL336644_c_000000001133__full	3124	No	NA	4	1	0	Medium-quality	Genome-fragment	75.07	HMM-based (lower-bound)	0
SL336650_c_000000000010__full	83759	No	NA	109	35	1	Complete	Genome-fragment	100	DTR (medium-confidence)	0
SL336650_c_000000000015__full	60886	No	NA	78	22	0	Medium-quality	Genome-fragment	83.2	HMM-based (lower-bound)	0
SL336650_c_000000000025__full	45019	No	NA	63	21	0	Medium-quality	Genome-fragment	60.45	HMM-based (lower-bound)	0	Lysogenic
SL336650_c_000000000027__full	41056	No	NA	62	24	1	Medium-quality	Genome-fragment	65.86	HMM-based (lower-bound)	0	Lysogenic
SL336650_c_000000000323	8592	No	NA	8	1	2	High-quality	High-quality	100	HMM-based (lower-bound)	0	Lysogenic
SL336650_c_000000001422__full	3549	No	NA	6	1	0	Complete	High-quality	100	DTR (medium-confidence)	0
SL336650_c_000000001556__full	3349	No	NA	4	1	0	Complete	High-quality	100	DTR (medium-confidence)	0
SL336651_c_000000000011__full	45180	No	NA	68	30	0	Medium-quality	Genome-fragment	54.87	HMM-based (lower-bound)	0
SL336652_c_000000000001__full	36582	No	NA	47	26	0	Medium-quality	Genome-fragment	56.15	HMM-based (lower-bound)	0
SL336652_c_000000000217__full	4907	No	NA	9	1	0	High-quality	High-quality	100	HMM-based (lower-bound)	0
SL336655_c_000000000660__full	3549	No	NA	6	1	0	Complete	High-quality	100	DTR (medium-confidence)	0
SL336655_c_000000000743__full	3349	No	NA	4	1	0	Complete	High-quality	100	DTR (medium-confidence)	0
SL336660_c_000000000870__full	3349	No	NA	5	1	0	Complete	High-quality	100	DTR (medium-confidence)	0
SL336661_c_000000000696__full	3549	No	NA	6	1	0	Complete	High-quality	100	DTR (medium-confidence)	0
SL336661_c_000000000773__full	3349	No	NA	5	1	0	Complete	High-quality	100	DTR (medium-confidence)	0
SL336664_c_000000000001__full	36738	No	NA	47	26	0	Medium-quality	Genome-fragment	56.39	HMM-based (lower-bound)	0
SL336666_c_000000000872__full	3549	No	NA	6	2	0	Complete	High-quality	100	DTR (medium-confidence)	0
SL336666_c_000000001006__full	3349	No	NA	4	1	0	Complete	High-quality	100	DTR (medium-confidence)	0
SL336669_c_000000000004__0_partial	72014	Yes	43962	82	16	21	Medium-quality	Genome-fragment	58.03	HMM-based (lower-bound)	38.95	Lysogenic
SL336669_c_000000000019__full	66225	No	NA	86	24	4	Medium-quality	Genome-fragment	76.62	HMM-based (lower-bound)	0	Lysogenic
SL336670_c_000000000682__full	3200	No	NA	5	1	0	Medium-quality	Genome-fragment	76.9	HMM-based (lower-bound)	0
SL336675_c_000000000001	171302	No	NA	163	1	126	High-quality	High-quality	92.91	HMM-based (lower-bound)	0
SL336679_c_000000000001__full	65431	No	NA	78	16	0	Complete	High-quality	100	DTR (medium-confidence)	0
SL336679_c_000000000002__full	54264	No	NA	77	34	1	Medium-quality	Genome-fragment	75.82	HMM-based (lower-bound)	0
SL336681_c_000000000002	167641	No	NA	160	1	123	High-quality	High-quality	90.92	HMM-based (lower-bound)	0
SL336681_c_000000000016__full	83759	No	NA	108	35	1	Complete	High-quality	100	DTR (medium-confidence)	0
SL336687_c_000000000001	259728	No	NA	244	1	178	High-quality	High-quality	100	HMM-based (lower-bound)	0
SL336687_c_000000000002	167746	No	NA	160	1	123	High-quality	High-quality	90.98	HMM-based (lower-bound)	0
SL336687_c_000000000024__full	50248	No	NA	77	13	1	Medium-quality	Genome-fragment	59.74	HMM-based (lower-bound)	0
SL336687_c_000000000037__full	35705	No	NA	48	29	0	Medium-quality	Genome-fragment	72.34	HMM-based (lower-bound)	0
SL336688_c_000000000004	184880	No	NA	172	1	146	High-quality	High-quality	100	HMM-based (lower-bound)	0
SL336688_c_000000000005	174463	No	NA	158	2	120	High-quality	High-quality	100	HMM-based (lower-bound)	0
SL336688_c_000000000006	174454	No	NA	171	1	117	High-quality	High-quality	100	HMM-based (lower-bound)	0
SL336688_c_000000000012__full	114098	No	NA	136	8	6	High-quality	High-quality	96.28	HMM-based (lower-bound)	0	Lysogenic
SL336689_c_000000000003	294349	No	NA	274	1	199	High-quality	High-quality	100	HMM-based (lower-bound)	0
SL336689_c_000000000005	237599	No	NA	204	1	142	High-quality	High-quality	100	HMM-based (lower-bound)	0	Lysogenic
SL336689_c_000000000008	185052	No	NA	173	1	146	High-quality	High-quality	100	HMM-based (lower-bound)	0
SL336689_c_000000000009	174463	No	NA	158	2	120	High-quality	High-quality	100	HMM-based (lower-bound)	0
SL336689_c_000000000011	129125	No	NA	117	1	88	Medium-quality	Genome-fragment	67.53	HMM-based (lower-bound)	0
SL336689_c_000000000014__full	114098	No	NA	136	8	6	High-quality	High-quality	96.28	HMM-based (lower-bound)	0	Lysogenic
SL336689_c_000000000015	113720	No	NA	114	3	79	High-quality	High-quality	92.29	HMM-based (lower-bound)	0
SL336690_c_000000000006	147201	No	NA	126	1	87	High-quality	High-quality	100	HMM-based (lower-bound)	0	Lysogenic
SL336690_c_000000000008	132770	No	NA	124	1	104	High-quality	High-quality	100	HMM-based (lower-bound)	0
SL336690_c_000000000010	122762	No	NA	109	2	83	High-quality	High-quality	100	HMM-based (lower-bound)	0
SL336690_c_000000000014__full	114098	No	NA	136	8	6	High-quality	High-quality	96.28	HMM-based (lower-bound)	0	Lysogenic
SL336690_c_000000000015	112138	No	NA	110	1	72	High-quality	High-quality	100	HMM-based (lower-bound)	0
SL336690_c_000000000022	85529	No	NA	83	2	57	Medium-quality	Genome-fragment	64.69	HMM-based (lower-bound)	0
SL336690_c_000000000025	83473	No	NA	66	1	46	Medium-quality	Genome-fragment	53.88	HMM-based (lower-bound)	0
SL336690_c_000000000076__full	44956	No	NA	57	18	1	Medium-quality	Genome-fragment	82.59	HMM-based (lower-bound)	0
SL336690_c_000000000082__full	42524	No	NA	69	18	0	Medium-quality	Genome-fragment	60.39	HMM-based (lower-bound)	0
SL336691_c_000000000004	111571	No	NA	111	1	71	High-quality	High-quality	99.87	HMM-based (lower-bound)	0
SL336691_c_000000000030__full	48496	No	NA	72	33	0	Medium-quality	Genome-fragment	67.6	HMM-based (lower-bound)	0	Lysogenic
SL336691_c_000000000043__full	44181	No	NA	61	31	0	Medium-quality	Genome-fragment	64.99	HMM-based (lower-bound)	0	Lysogenic
SL336691_c_000000000055__full	40459	No	NA	74	23	0	Medium-quality	Genome-fragment	54.31	HMM-based (lower-bound)	0	Lysogenic
SL336691_c_000000000059__full	38542	No	NA	63	17	1	Medium-quality	Genome-fragment	69.13	HMM-based (lower-bound)	0	Lysogenic
SL336692_c_000000000002	263308	No	NA	255	1	184	High-quality	High-quality	100	HMM-based (lower-bound)	0
SL336692_c_000000000007	184981	No	NA	172	1	146	High-quality	High-quality	100	HMM-based (lower-bound)	0
SL336692_c_000000000008	174463	No	NA	158	2	120	High-quality	High-quality	100	HMM-based (lower-bound)	0
SL336692_c_000000000015__full	120234	Yes	47607	146	15	54	Medium-quality	Genome-fragment	55.69	HMM-based (lower-bound)	60.4	Lysogenic
SL336692_c_000000000018__full	114098	No	NA	136	8	6	High-quality	High-quality	96.28	HMM-based (lower-bound)	0	Lysogenic
SL336692_c_000000000043	52486	No	NA	55	1	43	Medium-quality	Genome-fragment	88.33	HMM-based (lower-bound)	0
SL336692_c_000000000064__full	37151	No	NA	55	22	0	Medium-quality	Genome-fragment	63.16	HMM-based (lower-bound)	0	Lysogenic
SL336693_c_000000000003	227103	No	NA	217	1	157	High-quality	High-quality	100	HMM-based (lower-bound)	0
SL336693_c_000000000006	184917	No	NA	172	1	146	High-quality	High-quality	100	HMM-based (lower-bound)	0
SL336693_c_000000000007	174463	No	NA	158	2	120	High-quality	High-quality	100	HMM-based (lower-bound)	0
SL336693_c_000000000012__full	114098	No	NA	136	8	6	High-quality	High-quality	96.28	HMM-based (lower-bound)	0	Lysogenic
SL336693_c_000000000021	77469	No	NA	69	1	42	Medium-quality	Genome-fragment	84.97	HMM-based (lower-bound)	0	Lysogenic
SL336693_c_000000000034__full	35167	No	NA	44	26	0	Medium-quality	Genome-fragment	55.89	HMM-based (lower-bound)	0
SL336694_c_000000000001	171967	No	NA	160	1	134	High-quality	High-quality	100	HMM-based (lower-bound)	0
SL336694_c_000000000004	115506	No	NA	113	1	74	High-quality	High-quality	100	HMM-based (lower-bound)	0
SL336694_c_000000000008	76584	No	NA	69	1	42	Medium-quality	Genome-fragment	83.99	HMM-based (lower-bound)	0	Lysogenic
SL336694_c_000000000031__full	48627	No	NA	72	33	0	Medium-quality	Genome-fragment	67.76	HMM-based (lower-bound)	0	Lysogenic
SL336694_c_000000000039__full	43014	No	NA	69	18	1	Medium-quality	Genome-fragment	75.16	HMM-based (lower-bound)	0	Lysogenic
SL336695_c_000000000003__full	48496	No	NA	72	33	0	Medium-quality	Genome-fragment	67.6	HMM-based (lower-bound)	0	Lysogenic
SL336695_c_000000000009__full	44039	No	NA	61	31	0	Medium-quality	Genome-fragment	64.78	HMM-based (lower-bound)	0	Lysogenic
SL336696_c_000000000001	272271	No	NA	251	1	206	High-quality	High-quality	100	HMM-based (lower-bound)	0
SL336696_c_000000000005	227424	No	NA	217	1	158	High-quality	High-quality	100	HMM-based (lower-bound)	0
SL336696_c_000000000008	174514	No	NA	158	2	120	High-quality	High-quality	100	HMM-based (lower-bound)	0
SL336696_c_000000000011__full	114098	No	NA	136	8	6	High-quality	High-quality	96.28	HMM-based (lower-bound)	0	Lysogenic
SL336696_c_000000000019	76714	No	NA	69	1	41	Medium-quality	Genome-fragment	84.14	HMM-based (lower-bound)	0	Lysogenic
SL336696_c_000000000032__full	36703	No	NA	64	30	0	Medium-quality	Genome-fragment	58.61	HMM-based (lower-bound)	0
SL336697_c_000000000006	122044	No	NA	114	1	85	Medium-quality	Genome-fragment	63.83	HMM-based (lower-bound)	0
SL336697_c_000000000009__full	114098	No	NA	136	8	6	High-quality	High-quality	96.28	HMM-based (lower-bound)	0	Lysogenic
SL336697_c_000000000020	88200	No	NA	78	2	60	Medium-quality	Genome-fragment	78	HMM-based (lower-bound)	0
SL336697_c_000000000021	85286	No	NA	68	1	49	Medium-quality	Genome-fragment	55.05	HMM-based (lower-bound)	0
SL336697_c_000000000024	76714	No	NA	69	1	41	Medium-quality	Genome-fragment	84.14	HMM-based (lower-bound)	0	Lysogenic
SL336697_c_000000000033	68744	No	NA	70	1	48	Medium-quality	Genome-fragment	61.54	HMM-based (lower-bound)	0
SL336697_c_000000000036	64350	No	NA	79	4	11	Medium-quality	Genome-fragment	59.66	HMM-based (lower-bound)	0	Lysogenic
SL336697_c_000000000041	58175	No	NA	52	1	47	Medium-quality	Genome-fragment	52.98	HMM-based (lower-bound)	0
SL336697_c_000000000074__full	42386	No	NA	68	18	0	Medium-quality	Genome-fragment	60.2	HMM-based (lower-bound)	0
SL336697_c_000000000077__full	41765	No	NA	69	20	1	Medium-quality	Genome-fragment	55.55	HMM-based (lower-bound)	0	Lysogenic
SL336697_c_000000000128__full	28569	No	NA	28	11	1	Medium-quality	Genome-fragment	57.08	HMM-based (lower-bound)	0
SL336698_c_000000000003	227776	No	NA	217	1	158	High-quality	High-quality	100	HMM-based (lower-bound)	0
SL336698_c_000000000005	184883	No	NA	172	1	146	High-quality	High-quality	100	HMM-based (lower-bound)	0
SL336698_c_000000000011__full	114098	No	NA	136	8	6	High-quality	High-quality	96.28	HMM-based (lower-bound)	0	Lysogenic
SL336698_c_000000000016	92544	No	NA	81	2	60	Medium-quality	Genome-fragment	81.84	HMM-based (lower-bound)	0
SL336699_c_000000000002	291201	No	NA	278	1	202	High-quality	High-quality	100	HMM-based (lower-bound)	0
SL336699_c_000000000003	272293	No	NA	251	1	206	High-quality	High-quality	100	HMM-based (lower-bound)	0
SL336699_c_000000000006	226363	No	NA	192	1	136	High-quality	High-quality	100	HMM-based (lower-bound)	0	Lysogenic
SL336699_c_000000000008	174463	No	NA	158	2	120	High-quality	High-quality	100	HMM-based (lower-bound)	0
SL336699_c_000000000010__full	114098	No	NA	136	8	6	High-quality	High-quality	96.28	HMM-based (lower-bound)	0	Lysogenic
SL336699_c_000000000015	91751	No	NA	92	3	63	Medium-quality	Genome-fragment	85.83	HMM-based (lower-bound)	0
SL336699_c_000000000021	85266	No	NA	68	1	49	Medium-quality	Genome-fragment	55.04	HMM-based (lower-bound)	0
SL336699_c_000000000028	71458	No	NA	68	1	54	High-quality	High-quality	100	HMM-based (lower-bound)	0
SL336699_c_000000000032	63737	No	NA	64	1	44	Medium-quality	Genome-fragment	83.67	HMM-based (lower-bound)	0
SL336700_c_000000000001	203990	No	NA	204	1	139	High-quality	High-quality	100	HMM-based (lower-bound)	0
SL336700_c_000000000007	89289	No	NA	81	1	72	Medium-quality	Genome-fragment	81.32	HMM-based (lower-bound)	0
SL336700_c_000000000017__full	51932	No	NA	59	3	5	Medium-quality	Genome-fragment	76.64	HMM-based (lower-bound)	0
SL336701_c_000000000001	155959	No	NA	146	1	121	High-quality	High-quality	100	HMM-based (lower-bound)	0
SL336701_c_000000000004	92506	No	NA	81	2	60	Medium-quality	Genome-fragment	81.81	HMM-based (lower-bound)	0
SL336701_c_000000000017	63417	No	NA	58	1	42	Medium-quality	Genome-fragment	56.77	HMM-based (lower-bound)	0
SL336701_c_000000000019	58284	No	NA	58	2	44	Medium-quality	Genome-fragment	52.17	HMM-based (lower-bound)	0
SL336701_c_000000000031__full	48496	No	NA	72	33	0	Medium-quality	Genome-fragment	67.6	HMM-based (lower-bound)	0	Lysogenic
SL336701_c_000000000039__full	43989	No	NA	61	31	0	Medium-quality	Genome-fragment	64.71	HMM-based (lower-bound)	0	Lysogenic
SL336701_c_000000000048__full	38067	No	NA	68	21	0	Medium-quality	Genome-fragment	52.3	HMM-based (lower-bound)	0	Lysogenic
SL336701_c_000000000053__full	37043	No	NA	56	16	1	Medium-quality	Genome-fragment	65.87	HMM-based (lower-bound)	0
SL336702_c_000000000003	129221	No	NA	120	1	102	High-quality	High-quality	100	HMM-based (lower-bound)	0
SL336702_c_000000000020	57303	No	NA	49	2	35	Medium-quality	Genome-fragment	50.68	HMM-based (lower-bound)	0
SL336702_c_000000000022	57194	No	NA	58	1	37	Medium-quality	Genome-fragment	51.2	HMM-based (lower-bound)	0
SL336702_c_000000000030__full	48627	No	NA	72	33	0	Medium-quality	Genome-fragment	67.76	HMM-based (lower-bound)	0	Lysogenic
SL336702_c_000000000033__full	44181	No	NA	62	31	0	Medium-quality	Genome-fragment	64.99	HMM-based (lower-bound)	0	Lysogenic
SL336702_c_000000000043__full	40440	No	NA	73	23	0	Medium-quality	Genome-fragment	54.28	HMM-based (lower-bound)	0	Lysogenic
SL336702_c_000000000072__full	31649	No	NA	52	14	1	Medium-quality	Genome-fragment	58.4	HMM-based (lower-bound)	0
SL336703_c_000000000001	184858	No	NA	172	1	146	High-quality	High-quality	100	HMM-based (lower-bound)	0
SL336703_c_000000000002	184602	No	NA	170	1	128	High-quality	High-quality	96.55	HMM-based (lower-bound)	0
SL336703_c_000000000003	174344	No	NA	171	1	117	High-quality	High-quality	100	HMM-based (lower-bound)	0
SL336703_c_000000000005	168979	No	NA	148	1	97	High-quality	High-quality	100	HMM-based (lower-bound)	0
SL336703_c_000000000015	102693	No	NA	98	1	65	Medium-quality	Genome-fragment	68.68	HMM-based (lower-bound)	0
SL336703_c_000000000016	100840	No	NA	91	2	69	Medium-quality	Genome-fragment	89.18	HMM-based (lower-bound)	0
SL336703_c_000000000017	100528	No	NA	86	1	55	High-quality	High-quality	100	HMM-based (lower-bound)	0
SL336703_c_000000000024	76679	No	NA	68	1	41	Medium-quality	Genome-fragment	84.1	HMM-based (lower-bound)	0	Lysogenic
SL336703_c_000000000053__full	48413	No	NA	71	31	0	Medium-quality	Genome-fragment	85.19	HMM-based (lower-bound)	0	Lysogenic
SL336703_c_000000000072__full	40812	No	NA	61	28	0	Medium-quality	Genome-fragment	58.49	HMM-based (lower-bound)	0	Lysogenic
SL336703_c_000000000088__full	35812	No	NA	55	15	1	Medium-quality	Genome-fragment	65.62	HMM-based (lower-bound)	0
SL336705_c_000000000001__full	50231	No	NA	75	34	0	Medium-quality	Genome-fragment	69.15	HMM-based (lower-bound)	0	Lysogenic
SL336707_c_000000000002	161474	No	NA	160	1	109	High-quality	High-quality	100	HMM-based (lower-bound)	0
SL336707_c_000000000003	148573	No	NA	130	3	86	High-quality	High-quality	100	HMM-based (lower-bound)	0	Lysogenic
SL336707_c_000000000004	90036	No	NA	85	1	69	Medium-quality	Genome-fragment	82	HMM-based (lower-bound)	0
SL336710_c_000000000001	148204	No	NA	145	1	98	High-quality	High-quality	100	HMM-based (lower-bound)	0
SL336712_c_000000000001	167857	No	NA	165	1	112	High-quality	High-quality	100	HMM-based (lower-bound)	0
SL336712_c_000000000004	100775	No	NA	90	2	69	Medium-quality	Genome-fragment	89.12	HMM-based (lower-bound)	0
SL336712_c_000000000330	5921	No	NA	3	1	0	Medium-quality	Genome-fragment	55.2	HMM-based (lower-bound)	0
SL336714_c_000000000003	66756	No	NA	67	1	44	Medium-quality	Genome-fragment	59.76	HMM-based (lower-bound)	0
SL336715_c_000000000003	139443	No	NA	131	1	107	High-quality	High-quality	100	HMM-based (lower-bound)	0
SL336715_c_000000000005	124279	No	NA	122	1	79	High-quality	High-quality	100	HMM-based (lower-bound)	0
SL336715_c_000000000008	103027	No	NA	92	2	69	High-quality	High-quality	91.12	HMM-based (lower-bound)	0
SL336715_c_000000000014	76337	No	NA	68	1	42	Medium-quality	Genome-fragment	83.72	HMM-based (lower-bound)	0	Lysogenic
SL336715_c_000000000031__full	48496	No	NA	72	33	0	Medium-quality	Genome-fragment	67.6	HMM-based (lower-bound)	0	Lysogenic
SL336715_c_000000000052__full	32088	No	NA	51	19	1	Medium-quality	Genome-fragment	54.76	HMM-based (lower-bound)	0
SL336716_c_000000000003	227902	No	NA	217	1	158	High-quality	High-quality	100	HMM-based (lower-bound)	0
SL336716_c_000000000006	184880	No	NA	172	1	146	High-quality	High-quality	100	HMM-based (lower-bound)	0
SL336716_c_000000000008	174463	No	NA	158	2	120	High-quality	High-quality	100	HMM-based (lower-bound)	0
SL336716_c_000000000012__full	114098	No	NA	136	8	6	High-quality	High-quality	96.28	HMM-based (lower-bound)	0	Lysogenic
SL336716_c_000000000020	79610	No	NA	70	1	42	Medium-quality	Genome-fragment	87.31	HMM-based (lower-bound)	0	Lysogenic
SL336716_c_000000000032__full	44040	No	NA	76	22	0	Medium-quality	Genome-fragment	57.46	HMM-based (lower-bound)	0	Lysogenic
SL336716_c_000000000039	35386	No	NA	39	2	23	Medium-quality	Genome-fragment	53.5	HMM-based (lower-bound)	0
SL336717_c_000000000002	263125	No	NA	255	1	184	High-quality	High-quality	100	HMM-based (lower-bound)	0
SL336717_c_000000000006	184859	No	NA	172	1	146	High-quality	High-quality	100	HMM-based (lower-bound)	0
SL336717_c_000000000007	174435	No	NA	158	2	120	High-quality	High-quality	100	HMM-based (lower-bound)	0
SL336717_c_000000000012__full	114098	No	NA	136	8	6	High-quality	High-quality	96.28	HMM-based (lower-bound)	0	Lysogenic
SL336717_c_000000000020	76719	No	NA	69	1	41	Medium-quality	Genome-fragment	84.14	HMM-based (lower-bound)	0	Lysogenic
SL336717_c_000000000030__full	48496	No	NA	72	33	0	Medium-quality	Genome-fragment	67.6	HMM-based (lower-bound)	0	Lysogenic
SL336718_c_000000000001__full	49353	No	NA	75	34	0	Medium-quality	Genome-fragment	67.89	HMM-based (lower-bound)	0	Lysogenic
SL336719_c_000000000001__full	51049	No	NA	78	35	0	Medium-quality	Genome-fragment	69.39	HMM-based (lower-bound)	0	Lysogenic
SL336720_c_000000000960	7923	No	NA	8	1	0	Medium-quality	Genome-fragment	73.87	HMM-based (lower-bound)	0
SL336723_c_000000000006__full	48496	No	NA	72	33	0	Medium-quality	Genome-fragment	67.6	HMM-based (lower-bound)	0	Lysogenic
SL336723_c_000000000304__full	5165	No	NA	5	1	0	High-quality	High-quality	100	HMM-based (lower-bound)	0	Lysogenic
SL336726_c_000000000001__full	50245	No	NA	75	34	0	Medium-quality	Genome-fragment	69.16	HMM-based (lower-bound)	0	Lysogenic
SL336727_c_000000000001__full	49353	No	NA	75	35	0	Medium-quality	Genome-fragment	67.82	HMM-based (lower-bound)	0	Lysogenic
SL336730_c_000000000001__full	44250	No	NA	71	32	0	Medium-quality	Genome-fragment	61.97	HMM-based (lower-bound)	0	Lysogenic
SL336730_c_000000000114__full	5155	No	NA	5	1	0	High-quality	High-quality	100	HMM-based (lower-bound)	0	Lysogenic
SL336732_c_000000000001__full	47612	No	NA	74	34	0	Medium-quality	Genome-fragment	65.9	HMM-based (lower-bound)	0	Lysogenic
SL336733_c_000000000001__full	50242	No	NA	76	34	0	Medium-quality	Genome-fragment	68.93	HMM-based (lower-bound)	0	Lysogenic
SL336735_c_000000000004	5871	No	NA	1	1	0	Medium-quality	Genome-fragment	54.74	HMM-based (lower-bound)	0
SL336736_c_000000000017__full	37257	No	NA	50	22	0	Medium-quality	Genome-fragment	55.7	HMM-based (lower-bound)	0	Lysogenic
SL336737_c_000000000002	129960	No	NA	121	1	103	High-quality	High-quality	100	HMM-based (lower-bound)	0
SL336737_c_000000000003	127661	No	NA	128	1	83	High-quality	High-quality	100	HMM-based (lower-bound)	0
SL336743_c_000000000001	357489	No	NA	370	1	242	High-quality	High-quality	100	HMM-based (lower-bound)	0
SL336743_c_000000000002	284482	No	NA	279	1	181	High-quality	High-quality	100	HMM-based (lower-bound)	0
SL336743_c_000000000003	212865	No	NA	224	3	152	High-quality	High-quality	100	HMM-based (lower-bound)	0
SL336743_c_000000000004	162465	No	NA	173	2	118	High-quality	High-quality	100	HMM-based (lower-bound)	0
SL336743_c_000000000008	115827	No	NA	116	3	84	High-quality	High-quality	100	HMM-based (lower-bound)	0
SL336743_c_000000000009	110437	No	NA	108	1	72	High-quality	High-quality	96.45	HMM-based (lower-bound)	0
SL336743_c_000000000025	65340	No	NA	74	1	48	Medium-quality	Genome-fragment	59.63	HMM-based (lower-bound)	0	Lysogenic
SL336743_c_000000000030	62851	No	NA	71	5	7	Medium-quality	Genome-fragment	55.18	HMM-based (lower-bound)	0
SL336743_c_000000000053__full	49353	No	NA	75	34	0	Medium-quality	Genome-fragment	67.89	HMM-based (lower-bound)	0	Lysogenic
SL336743_c_000000000062__full	43966	No	NA	72	37	0	Medium-quality	Genome-fragment	70.89	HMM-based (lower-bound)	0	Lysogenic
SL336743_c_000000000066__full	41717	No	NA	63	20	1	Medium-quality	Genome-fragment	71.62	HMM-based (lower-bound)	0	Lysogenic
SL336745_c_000000000001	221587	No	NA	211	1	152	High-quality	High-quality	100	HMM-based (lower-bound)	0
SL336745_c_000000000004	100630	No	NA	90	2	69	Medium-quality	Genome-fragment	89	HMM-based (lower-bound)	0
SL336745_c_000000000005	100241	No	NA	94	1	77	High-quality	High-quality	91.29	HMM-based (lower-bound)	0
SL336745_c_000000000023	54649	No	NA	62	3	2	Medium-quality	Genome-fragment	88.83	HMM-based (lower-bound)	0	Lysogenic
SL336746_c_000000000899	6938	No	NA	8	1	0	Medium-quality	Genome-fragment	64.68	HMM-based (lower-bound)	0
SL336747_c_000000000212__full	2276	No	NA	3	1	0	Medium-quality	Genome-fragment	54.69	HMM-based (lower-bound)	0
SL336751_c_000000000001	179300	No	NA	181	3	134	High-quality	High-quality	100	HMM-based (lower-bound)	0
SL336751_c_000000000016	56291	No	NA	63	3	7	Medium-quality	Genome-fragment	55.18	HMM-based (lower-bound)	0
SL336751_c_000000000024__full	48496	No	NA	72	33	0	Medium-quality	Genome-fragment	67.6	HMM-based (lower-bound)	0	Lysogenic
SL336752_c_000000000001	295456	No	NA	275	1	199	High-quality	High-quality	100	HMM-based (lower-bound)	0
SL336752_c_000000000005	237613	No	NA	204	1	142	High-quality	High-quality	100	HMM-based (lower-bound)	0	Lysogenic
SL336752_c_000000000008	184882	No	NA	172	1	146	High-quality	High-quality	100	HMM-based (lower-bound)	0
SL336752_c_000000000009	174481	No	NA	158	2	120	High-quality	High-quality	100	HMM-based (lower-bound)	0
SL336752_c_000000000013__full	114098	No	NA	136	8	6	High-quality	High-quality	96.28	HMM-based (lower-bound)	0	Lysogenic
SL336754_c_000000000006	174481	No	NA	171	1	117	High-quality	High-quality	100	HMM-based (lower-bound)	0
SL336754_c_000000000008	129157	No	NA	120	1	102	High-quality	High-quality	100	HMM-based (lower-bound)	0
SL336754_c_000000000010__full	114098	No	NA	136	8	6	High-quality	High-quality	96.28	HMM-based (lower-bound)	0	Lysogenic
SL336754_c_000000000012	100853	No	NA	91	2	69	Medium-quality	Genome-fragment	89.19	HMM-based (lower-bound)	0
SL336754_c_000000000017	78656	No	NA	70	1	42	Medium-quality	Genome-fragment	86.27	HMM-based (lower-bound)	0	Lysogenic
SL336755_c_000000000002	246660	No	NA	237	1	172	High-quality	High-quality	100	HMM-based (lower-bound)	0
SL336755_c_000000000005__0_partial	63075	Yes	41381	70	21	9	Medium-quality	Genome-fragment	87.99	HMM-based (lower-bound)	34.39	Lysogenic
SL336755_c_000000000006	174463	No	NA	158	2	120	High-quality	High-quality	100	HMM-based (lower-bound)	0
SL336755_c_000000000007__full	169552	Yes	68572	208	29	53	High-quality	High-quality	90.81	HMM-based (lower-bound)	59.56	Lysogenic
SL336755_c_000000000012	129170	No	NA	120	1	102	High-quality	High-quality	100	HMM-based (lower-bound)	0
SL336755_c_000000000015__full	114288	No	NA	137	8	7	High-quality	High-quality	96.29	HMM-based (lower-bound)	0	Lysogenic
SL336755_c_000000000055__full	45326	No	NA	64	31	0	Complete	High-quality	100	DTR (high-confidence)	0
SL336758_c_000000000001__full	49342	No	NA	75	34	0	Medium-quality	Genome-fragment	67.88	HMM-based (lower-bound)	0	Lysogenic
SL336760_c_000000000001	227814	No	NA	217	1	158	High-quality	High-quality	100	HMM-based (lower-bound)	0
SL336760_c_000000000002	143457	No	NA	129	2	99	High-quality	High-quality	100	HMM-based (lower-bound)	0
SL336760_c_000000000003	129149	No	NA	120	1	102	High-quality	High-quality	100	HMM-based (lower-bound)	0
SL336764_c_000000000004	142896	No	NA	138	1	95	High-quality	High-quality	100	HMM-based (lower-bound)	0
SL336764_c_000000000008__full	114091	No	NA	136	8	6	High-quality	High-quality	96.28	HMM-based (lower-bound)	0	Lysogenic
SL336764_c_000000000010	96739	No	NA	96	1	72	Medium-quality	Genome-fragment	61.54	HMM-based (lower-bound)	0
SL336764_c_000000000013	83105	No	NA	75	1	43	High-quality	High-quality	91.15	HMM-based (lower-bound)	0	Lysogenic
SL336764_c_000000000035	56852	No	NA	54	1	47	Medium-quality	Genome-fragment	51.78	HMM-based (lower-bound)	0
SL336764_c_000000000079__full	37961	No	NA	66	19	1	Medium-quality	Genome-fragment	66.84	HMM-based (lower-bound)	0	Lysogenic
SL336765_c_000000000001	210300	No	NA	201	1	146	High-quality	High-quality	100	HMM-based (lower-bound)	0
SL336765_c_000000000002	155993	No	NA	146	1	121	High-quality	High-quality	100	HMM-based (lower-bound)	0
SL336765_c_000000000004	138986	No	NA	124	2	96	High-quality	High-quality	100	HMM-based (lower-bound)	0
SL336765_c_000000000014	83962	No	NA	90	1	61	Medium-quality	Genome-fragment	76.63	HMM-based (lower-bound)	0	Lysogenic
SL336765_c_000000000036	56623	No	NA	51	1	16	High-quality	High-quality	90.81	HMM-based (lower-bound)	0	Lysogenic
SL336765_c_000000000047__full	48496	No	NA	72	33	0	Medium-quality	Genome-fragment	67.6	HMM-based (lower-bound)	0	Lysogenic
SL336765_c_000000000061__full	44554	No	NA	72	36	0	Medium-quality	Genome-fragment	71.69	HMM-based (lower-bound)	0	Lysogenic
SL336766_c_000000000007__full	49353	No	NA	75	34	0	Medium-quality	Genome-fragment	67.89	HMM-based (lower-bound)	0	Lysogenic
SL336767_c_000000000001__full	46436	No	NA	70	22	0	Medium-quality	Genome-fragment	66.34	HMM-based (lower-bound)	0	Lysogenic
SL336768_c_000000000009	94969	No	NA	98	1	75	High-quality	High-quality	100	HMM-based (lower-bound)	0
SL336768_c_000000000017	82422	No	NA	84	1	62	Medium-quality	Genome-fragment	73.78	HMM-based (lower-bound)	0
SL336768_c_000000000019	76172	No	NA	79	1	53	Medium-quality	Genome-fragment	68.19	HMM-based (lower-bound)	0
SL336768_c_000000000025	68512	No	NA	73	2	45	Medium-quality	Genome-fragment	53.81	HMM-based (lower-bound)	0
SL336768_c_000000001019__full	4537	No	NA	4	4	0	Medium-quality	Genome-fragment	56.25	HMM-based (lower-bound)	0
SL336770_c_000000000001__0_partial	43406	No	NA	50	3	4	Medium-quality	Genome-fragment	64.05	HMM-based (lower-bound)	0
SL336770_c_000000000002	184705	No	NA	172	1	146	High-quality	High-quality	100	HMM-based (lower-bound)	0
SL336770_c_000000000004	171438	No	NA	157	2	118	High-quality	High-quality	100	HMM-based (lower-bound)	0
SL336770_c_000000000005	167936	No	NA	165	1	112	High-quality	High-quality	100	HMM-based (lower-bound)	0
SL336771_c_000000000003	174377	No	NA	171	1	117	High-quality	High-quality	100	HMM-based (lower-bound)	0
SL336771_c_000000000006	156915	No	NA	147	1	122	High-quality	High-quality	100	HMM-based (lower-bound)	0
SL336771_c_000000000010__full	114137	No	NA	136	8	6	High-quality	High-quality	96.28	HMM-based (lower-bound)	0	Lysogenic
SL336771_c_000000000011	111034	No	NA	101	2	75	High-quality	High-quality	98.2	HMM-based (lower-bound)	0
SL336771_c_000000000027__full	50974	No	NA	79	28	1	Medium-quality	Genome-fragment	65.42	HMM-based (lower-bound)	0	Lysogenic
SL336772_c_000000000001	296007	No	NA	300	3	193	High-quality	High-quality	100	HMM-based (lower-bound)	0
SL336772_c_000000000002	260816	No	NA	268	1	177	High-quality	High-quality	100	HMM-based (lower-bound)	0
SL336772_c_000000000003	235894	No	NA	226	1	168	High-quality	High-quality	100	HMM-based (lower-bound)	0
SL336772_c_000000000004	229453	No	NA	231	2	155	High-quality	High-quality	100	HMM-based (lower-bound)	0
SL336772_c_000000000005	180737	No	NA	164	1	103	High-quality	High-quality	100	HMM-based (lower-bound)	0
SL336772_c_000000000007	174168	No	NA	158	2	120	High-quality	High-quality	100	HMM-based (lower-bound)	0
SL336772_c_000000000010	162067	No	NA	154	1	102	High-quality	High-quality	100	HMM-based (lower-bound)	0
SL336772_c_000000000011	155968	No	NA	146	1	121	High-quality	High-quality	100	HMM-based (lower-bound)	0
SL336772_c_000000000018	121125	No	NA	114	2	85	High-quality	High-quality	100	HMM-based (lower-bound)	0
SL336772_c_000000000019	113053	No	NA	120	2	82	Medium-quality	Genome-fragment	88.12	HMM-based (lower-bound)	0
SL336772_c_000000000027	86001	No	NA	88	1	65	High-quality	High-quality	100	HMM-based (lower-bound)	0
SL336772_c_000000000033	77357	No	NA	68	1	42	Medium-quality	Genome-fragment	84.84	HMM-based (lower-bound)	0	Lysogenic
SL336772_c_000000000038	71460	No	NA	68	1	45	Medium-quality	Genome-fragment	62.41	HMM-based (lower-bound)	0
SL336772_c_000000000044	62217	No	NA	71	6	7	Medium-quality	Genome-fragment	56.88	HMM-based (lower-bound)	0
SL336772_c_000000000066__full	49430	No	NA	56	3	4	Medium-quality	Genome-fragment	72.94	HMM-based (lower-bound)	0
SL336773_c_000000000003	114291	No	NA	108	2	83	High-quality	High-quality	100	HMM-based (lower-bound)	0
SL336773_c_000000000004	110336	No	NA	120	2	82	Medium-quality	Genome-fragment	86.66	HMM-based (lower-bound)	0
SL336773_c_000000000012	90556	No	NA	92	1	69	Medium-quality	Genome-fragment	81.06	HMM-based (lower-bound)	0
SL336773_c_000000000024	62013	No	NA	71	6	7	Medium-quality	Genome-fragment	56.69	HMM-based (lower-bound)	0
SL336773_c_000000000042__full	48496	No	NA	72	33	0	Medium-quality	Genome-fragment	67.6	HMM-based (lower-bound)	0	Lysogenic
SL336773_c_000000000048__full	44303	No	NA	72	36	0	Medium-quality	Genome-fragment	71.38	HMM-based (lower-bound)	0	Lysogenic
SL336774_c_000000000002	63363	No	NA	73	1	48	Medium-quality	Genome-fragment	57.83	HMM-based (lower-bound)	0	Lysogenic
SL336774_c_000000000008__full	48496	No	NA	72	33	0	Medium-quality	Genome-fragment	67.6	HMM-based (lower-bound)	0	Lysogenic
SL336774_c_000000000015__full	37833	No	NA	64	32	0	Medium-quality	Genome-fragment	57.7	HMM-based (lower-bound)	0	Lysogenic
SL336774_c_000000000021__full	34073	No	NA	48	27	0	Medium-quality	Genome-fragment	50.77	HMM-based (lower-bound)	0
SL336775_c_000000000002__full	49353	No	NA	75	34	0	Medium-quality	Genome-fragment	67.89	HMM-based (lower-bound)	0	Lysogenic
SL336776_c_000000000004	91447	No	NA	85	1	69	Medium-quality	Genome-fragment	83.28	HMM-based (lower-bound)	0
SL336776_c_000000000012	70912	No	NA	76	2	46	Medium-quality	Genome-fragment	55.69	HMM-based (lower-bound)	0
SL336776_c_000000000019	66909	No	NA	48	1	31	Medium-quality	Genome-fragment	50.4	HMM-based (lower-bound)	0
SL336776_c_000000000021	63118	No	NA	65	1	46	Medium-quality	Genome-fragment	56.5	HMM-based (lower-bound)	0
SL336776_c_000000000022	62279	No	NA	63	1	45	Medium-quality	Genome-fragment	55.75	HMM-based (lower-bound)	0
SL336778_c_000000000001	167811	No	NA	165	1	112	High-quality	High-quality	100	HMM-based (lower-bound)	0
SL336778_c_000000000009	106363	No	NA	96	1	85	High-quality	High-quality	96.87	HMM-based (lower-bound)	0
SL336778_c_000000000011	101047	No	NA	91	2	69	Medium-quality	Genome-fragment	89.36	HMM-based (lower-bound)	0
SL336779_c_000000000001	241304	No	NA	230	1	168	High-quality	High-quality	100	HMM-based (lower-bound)	0
SL336779_c_000000000002	174653	No	NA	158	2	120	High-quality	High-quality	100	HMM-based (lower-bound)	0
SL336779_c_000000000005	149537	No	NA	139	1	115	High-quality	High-quality	100	HMM-based (lower-bound)	0
SL336779_c_000000000016	70812	No	NA	82	5	2	High-quality	High-quality	93.24	HMM-based (lower-bound)	0	Lysogenic
SL336779_c_000000000029__full	50985	No	NA	79	28	1	Medium-quality	Genome-fragment	65.43	HMM-based (lower-bound)	0	Lysogenic
SL336779_c_000000000032__full	43284	No	NA	52	3	4	Medium-quality	Genome-fragment	63.87	HMM-based (lower-bound)	0
SL336780_c_000000000002	230491	No	NA	225	1	141	High-quality	High-quality	100	HMM-based (lower-bound)	0
SL336780_c_000000000003	201927	No	NA	204	4	148	High-quality	High-quality	100	HMM-based (lower-bound)	0
SL336780_c_000000000009	124808	No	NA	132	1	100	High-quality	High-quality	100	HMM-based (lower-bound)	0
SL336780_c_000000000011	115328	No	NA	115	1	86	High-quality	High-quality	100	HMM-based (lower-bound)	0
SL336780_c_000000000018	101997	No	NA	98	1	63	High-quality	High-quality	91.3	HMM-based (lower-bound)	0
SL336780_c_000000000019	98576	No	NA	105	2	69	Medium-quality	Genome-fragment	77.42	HMM-based (lower-bound)	0
SL336780_c_000000000055	55760	No	NA	50	1	45	Medium-quality	Genome-fragment	50.78	HMM-based (lower-bound)	0
SL336780_c_000000000110__full	35347	No	NA	48	27	0	Medium-quality	Genome-fragment	56.03	HMM-based (lower-bound)	0
SL336781_c_000000000006	104035	No	NA	106	1	80	High-quality	High-quality	100	HMM-based (lower-bound)	0
SL336781_c_000000000007	94183	No	NA	88	2	69	High-quality	High-quality	94.01	HMM-based (lower-bound)	0
SL336781_c_000000000012	76945	No	NA	73	1	51	Medium-quality	Genome-fragment	67.2	HMM-based (lower-bound)	0
SL336781_c_000000000021	56305	No	NA	63	3	7	Medium-quality	Genome-fragment	55.19	HMM-based (lower-bound)	0
SL336781_c_000000000027__full	48496	No	NA	72	33	0	Medium-quality	Genome-fragment	67.6	HMM-based (lower-bound)	0	Lysogenic
SL336782_c_000000000001	85161	No	NA	81	1	62	Medium-quality	Genome-fragment	76.23	HMM-based (lower-bound)	0
SL336782_c_000000000021__full	50985	No	NA	79	28	1	Medium-quality	Genome-fragment	65.43	HMM-based (lower-bound)	0	Lysogenic
SL336782_c_000000000022__full	49353	No	NA	75	34	0	Medium-quality	Genome-fragment	67.89	HMM-based (lower-bound)	0	Lysogenic
SL336782_c_000000000048__full	36566	No	NA	45	19	0	Medium-quality	Genome-fragment	53.39	HMM-based (lower-bound)	0
SL336782_c_000000000088__full	28151	No	NA	40	12	1	Medium-quality	Genome-fragment	52.6	HMM-based (lower-bound)	0
SL336783_c_000000000007	125686	No	NA	129	1	89	High-quality	High-quality	100	HMM-based (lower-bound)	0	Lysogenic
SL336783_c_000000000029__full	49353	No	NA	75	34	0	Medium-quality	Genome-fragment	67.89	HMM-based (lower-bound)	0	Lysogenic
SL336783_c_000000000033__full	44165	No	NA	61	31	0	Medium-quality	Genome-fragment	64.97	HMM-based (lower-bound)	0	Lysogenic
SL336784_c_000000000003__full	47924	No	NA	81	26	0	Medium-quality	Genome-fragment	56.71	HMM-based (lower-bound)	0	Lysogenic
SL336789_c_000000000001__full	56844	No	NA	66	36	0	Medium-quality	Genome-fragment	81.62	HMM-based (lower-bound)	0
SL336789_c_000000000002__full	44884	No	NA	77	24	0	Medium-quality	Genome-fragment	61.15	HMM-based (lower-bound)	0	Lysogenic
SL336792_c_000000000001__full	69358	No	NA	85	23	0	Complete	High-quality	100	DTR (medium-confidence)	0
SL336792_c_000000000002__full	40280	No	NA	50	14	0	Medium-quality	Genome-fragment	73.66	HMM-based (lower-bound)	0
SL336794_c_000000000040__full	19622	No	NA	26	23	0	Medium-quality	Genome-fragment	59.11	HMM-based (lower-bound)	0
SL336794_c_000000000603__full	2436	No	NA	3	1	0	Medium-quality	Genome-fragment	58.54	HMM-based (lower-bound)	0
SL336798_c_000000000001__full	40025	No	NA	60	24	0	Medium-quality	Genome-fragment	64.2	HMM-based (lower-bound)	0	Lysogenic
SL336798_c_000000000487__full	3549	No	NA	6	1	0	Complete	High-quality	100	DTR (medium-confidence)	0
SL336798_c_000000000551__full	3349	No	NA	5	1	0	Complete	High-quality	100	DTR (medium-confidence)	0
SL336798_c_000000000963__full	2527	No	NA	3	1	0	Medium-quality	Genome-fragment	60.72	HMM-based (lower-bound)	0
SL336804_c_000000000001__full	111604	No	NA	151	19	2	Medium-quality	Genome-fragment	63.13	HMM-based (lower-bound)	0
SL336808_c_000000000002__full	74712	No	NA	86	44	4	High-quality	High-quality	95.4	HMM-based (lower-bound)	0	Lysogenic
SL336809_c_000000000001__full	7824	No	NA	15	2	0	Medium-quality	Genome-fragment	79.43	HMM-based (lower-bound)	0
SL336810_c_000000000001__full	61161	No	NA	72	25	0	Medium-quality	Genome-fragment	83.26	HMM-based (lower-bound)	0
SL336817_c_000000000001__full	49994	No	NA	65	11	0	Medium-quality	Genome-fragment	67.85	HMM-based (lower-bound)	0
SL336820_c_000000000001	591039	No	NA	580	1	432	High-quality	High-quality	100	HMM-based (lower-bound)	0	Lysogenic
SL336820_c_000000000002__0_partial	60055	Yes	34529	81	23	17	Medium-quality	Genome-fragment	74.75	HMM-based (lower-bound)	42.5	Lysogenic
SL336821_c_000000000001__full	51058	No	NA	77	32	0	Medium-quality	Genome-fragment	75.77	HMM-based (lower-bound)	0	Lysogenic
SL336821_c_000000000002__full	41086	No	NA	62	24	1	Medium-quality	Genome-fragment	65.9	HMM-based (lower-bound)	0	Lysogenic
SL336821_c_000000000773__full	3549	No	NA	5	1	0	Complete	High-quality	100	DTR (medium-confidence)	0
SL336826_c_000000000001	273516	No	NA	271	6	196	High-quality	High-quality	100	HMM-based (lower-bound)	0
SL336826_c_000000000002	232240	No	NA	207	2	152	High-quality	High-quality	100	HMM-based (lower-bound)	0
SL336826_c_000000000003__0_partial	38941	Yes	35397	49	9	3	Medium-quality	Genome-fragment	51.81	HMM-based (lower-bound)	9.1	Lysogenic
SL336826_c_000000000007	167768	No	NA	161	1	123	High-quality	High-quality	90.99	HMM-based (lower-bound)	0
SL336826_c_000000000043__full	55452	No	NA	73	21	0	Medium-quality	Genome-fragment	77.07	HMM-based (lower-bound)	0
SL336826_c_000000000366__full	8200	No	NA	11	1	0	Complete	High-quality	100	DTR (medium-confidence)	0	Lysogenic
SL336826_c_000000000454	6900	No	NA	10	1	0	Medium-quality	Genome-fragment	69.31	HMM-based (lower-bound)	0
SL336827_c_000000000002__full	39783	No	NA	52	20	0	High-quality	High-quality	90.25	HMM-based (lower-bound)	0
SL336827_c_000000000032__full	17393	No	NA	26	25	0	Medium-quality	Genome-fragment	52.94	HMM-based (lower-bound)	0
SL336827_c_000000001145__full	3226	No	NA	5	1	0	Medium-quality	Genome-fragment	77.52	HMM-based (lower-bound)	0
SL336828_c_000000000001__full	46782	No	NA	64	23	1	Medium-quality	Genome-fragment	66.09	HMM-based (lower-bound)	0	Lysogenic
SL336829_c_000000000001__full	44689	No	NA	66	22	0	Medium-quality	Genome-fragment	75.88	HMM-based (lower-bound)	0
SL336831_c_000000000001__full	44319	No	NA	70	27	0	Medium-quality	Genome-fragment	67.44	HMM-based (lower-bound)	0	Lysogenic
SL336831_c_000000000002__full	37758	No	NA	45	29	0	Medium-quality	Genome-fragment	57.96	HMM-based (lower-bound)	0
SL336832_c_000000000002__full	46189	Yes	40590	58	20	3	High-quality	High-quality	91.49	HMM-based (lower-bound)	12.12	Lysogenic
SL336832_c_000000001282__full	2627	No	NA	4	1	0	Medium-quality	Genome-fragment	63.13	HMM-based (lower-bound)	0
SL336834_c_000000000027	8588	No	NA	7	1	0	High-quality	High-quality	100	HMM-based (lower-bound)	0
SL336834_c_000000000467__full	3349	No	NA	5	2	0	Complete	High-quality	100	DTR (medium-confidence)	0
SL336840_c_000000000383__full	3197	No	NA	4	1	0	Medium-quality	Genome-fragment	76.83	HMM-based (lower-bound)	0
SL336840_c_000000000450__full	2913	No	NA	4	1	0	Medium-quality	Genome-fragment	70	HMM-based (lower-bound)	0
SL336842_c_000000000426__full	3369	No	NA	5	1	0	Medium-quality	Genome-fragment	80.96	HMM-based (lower-bound)	0
SL336842_c_000000000598__full	2815	No	NA	3	1	0	Medium-quality	Genome-fragment	67.65	HMM-based (lower-bound)	0
SL342524_c_000000000001	10110	No	NA	5	1	0	High-quality	High-quality	94.26	HMM-based (lower-bound)	0
SL342525_c_000000000001__full	67135	No	NA	92	15	0	High-quality	High-quality	91.6	HMM-based (lower-bound)	0
SL342529_c_000000000001__full	47530	No	NA	76	22	0	Medium-quality	Genome-fragment	65.47	HMM-based (lower-bound)	0
SL342532_c_000000000041__full	13914	No	NA	17	9	0	Medium-quality	Genome-fragment	59.66	HMM-based (lower-bound)	0
SL342535_c_000000000001__full	49340	No	NA	82	24	0	Medium-quality	Genome-fragment	64.96	HMM-based (lower-bound)	0	Lysogenic
SL342535_c_000000000014	7080	No	NA	2	1	0	Medium-quality	Genome-fragment	66.01	HMM-based (lower-bound)	0
SL342535_c_000000000161__full	2051	No	NA	3	3	0	Medium-quality	Genome-fragment	77.68	HMM-based (lower-bound)	0
SL342536_c_000000000001__full	52348	No	NA	69	34	1	Medium-quality	Genome-fragment	74.46	HMM-based (lower-bound)	0
SL342536_c_000000000002__full	44099	No	NA	68	30	0	Medium-quality	Genome-fragment	77.91	HMM-based (lower-bound)	0
SL342536_c_000000000003__full	40657	No	NA	51	18	0	Medium-quality	Genome-fragment	68.54	HMM-based (lower-bound)	0
SL342538_c_000000000007	7080	No	NA	1	1	0	Medium-quality	Genome-fragment	66.01	HMM-based (lower-bound)	0
SL342540_c_000000000001__full	43738	No	NA	61	17	0	Medium-quality	Genome-fragment	78.22	HMM-based (lower-bound)	0
SL342541_c_000000000001__full	41458	No	NA	63	32	0	Medium-quality	Genome-fragment	67.42	HMM-based (lower-bound)	0
SL342544_c_000000000001__full	47905	No	NA	61	18	0	Medium-quality	Genome-fragment	62.83	HMM-based (lower-bound)	0
SL342547_c_000000000038__full	40038	No	NA	61	25	0	Medium-quality	Genome-fragment	64.22	HMM-based (lower-bound)	0	Lysogenic
SL342547_c_000000000622__full	3549	No	NA	6	1	0	Complete	High-quality	100	DTR (medium-confidence)	0
SL342547_c_000000000682__full	3349	No	NA	4	1	0	Complete	High-quality	100	DTR (medium-confidence)	0
SL342548_c_000000000036__full	45198	No	NA	64	22	0	Medium-quality	Genome-fragment	60.45	HMM-based (lower-bound)	0	Lysogenic
SL342548_c_000000000040__full	43090	Yes	40584	64	24	2	Medium-quality	Genome-fragment	65.1	HMM-based (lower-bound)	5.82	Lysogenic
SL342548_c_000000001240__full	3549	No	NA	6	1	0	Complete	High-quality	100	DTR (medium-confidence)	0
SL342548_c_000000001333__full	3349	No	NA	5	1	0	Complete	High-quality	100	DTR (medium-confidence)	0
SL342549_c_000000000457__full	3549	No	NA	6	1	0	Complete	High-quality	100	DTR (medium-confidence)	0
SL342549_c_000000000564__full	3172	No	NA	5	1	0	Medium-quality	Genome-fragment	76.22	HMM-based (lower-bound)	0
SL345440_c_000000000007	148184	No	NA	147	1	104	Medium-quality	Genome-fragment	57.36	HMM-based (lower-bound)	0	Lysogenic
SL345440_c_000000000009	144682	No	NA	131	3	72	High-quality	High-quality	93.42	HMM-based (lower-bound)	0	Lysogenic
SL345440_c_000000000022	99225	No	NA	87	1	43	High-quality	High-quality	100	HMM-based (lower-bound)	0	Lysogenic
SL345440_c_000000000030	81393	No	NA	69	2	51	Medium-quality	Genome-fragment	86.54	HMM-based (lower-bound)	0
SL345440_c_000000000031	81373	No	NA	87	2	20	Medium-quality	Genome-fragment	71.02	HMM-based (lower-bound)	0	Lysogenic
SL345440_c_000000000036__full	73032	No	NA	99	8	3	Medium-quality	Genome-fragment	57.86	HMM-based (lower-bound)	0	Lysogenic
SL345440_c_000000000044	63406	No	NA	58	1	36	Medium-quality	Genome-fragment	56.37	HMM-based (lower-bound)	0
SL345440_c_000000000049__full	60813	No	NA	110	48	1	Complete	High-quality	100	DTR (medium-confidence)	0	Lysogenic
SL345440_c_000000000055__full	56477	No	NA	88	22	0	High-quality	High-quality	100	AAI-based (medium-confidence)	0
SL345440_c_000000000076__full	43169	No	NA	57	27	1	Medium-quality	Genome-fragment	77.8	AAI-based (medium-confidence)	0
SL345440_c_000000001727	3531	No	NA	3	1	0	Medium-quality	Genome-fragment	53.77	AAI-based (medium-confidence)	0
SL345441_c_000000000010__full	56477	No	NA	87	22	0	High-quality	High-quality	100	AAI-based (medium-confidence)	0
SL345442_c_000000000004__full	62933	No	NA	105	31	0	Medium-quality	Genome-fragment	83.14	HMM-based (lower-bound)	0
SL345442_c_000000000005__full	56628	No	NA	88	22	0	Complete	High-quality	100	DTR (high-confidence)	0
SL345442_c_000000000007__full	52552	No	NA	92	42	1	High-quality	High-quality	100	AAI-based (medium-confidence)	0	Lysogenic
SL345443_c_000000000017__full	78381	No	NA	125	44	1	High-quality	High-quality	100	AAI-based (high-confidence)	0
SL345443_c_000000000025__full	63489	No	NA	96	29	0	Medium-quality	Genome-fragment	85.01	HMM-based (lower-bound)	0
SL345443_c_000000000026__full	62321	No	NA	97	21	0	Medium-quality	Genome-fragment	89.25	HMM-based (lower-bound)	0
SL345443_c_000000000027__full	62087	No	NA	103	32	1	Complete	High-quality	100	DTR (medium-confidence)	0
SL345443_c_000000000028__full	60663	No	NA	109	48	1	Medium-quality	Genome-fragment	85.07	HMM-based (lower-bound)	0	Lysogenic
SL345443_c_000000000029__full	58879	No	NA	84	4	1	Medium-quality	Genome-fragment	56.85	HMM-based (lower-bound)	0	Lysogenic
SL345443_c_000000000030__full	58227	No	NA	88	37	0	Complete	High-quality	100	DTR (high-confidence)	0
SL345443_c_000000000031__full	56628	No	NA	88	22	0	Complete	High-quality	100	DTR (high-confidence)	0
SL345443_c_000000000033__full	53921	No	NA	64	2	4	High-quality	High-quality	100	HMM-based (lower-bound)	0	Lysogenic
SL345443_c_000000000042__full	36919	No	NA	49	16	1	Medium-quality	Genome-fragment	85.21	AAI-based (medium-confidence)	0	Lysogenic
SL345443_c_000000000053__full	29713	No	NA	37	13	0	Medium-quality	Genome-fragment	51.04	AAI-based (medium-confidence)	0
SL345443_c_000000000097__full	19787	No	NA	29	17	0	Medium-quality	Genome-fragment	58.74	AAI-based (high-confidence)	0
SL345443_c_000000000816	6673	No	NA	5	1	0	Complete	High-quality	100	DTR (high-confidence)	0
SL345443_c_000000005451__full	2362	No	NA	3	2	0	High-quality	High-quality	99.65	HMM-based (lower-bound)	0
SL345444_c_000000000010__full	58097	No	NA	80	8	0	Medium-quality	Genome-fragment	77.86	HMM-based (lower-bound)	0
SL345444_c_000000000013__full	56560	No	NA	88	22	0	High-quality	High-quality	100	AAI-based (medium-confidence)	0
SL345444_c_000000000017	53425	No	NA	51	1	19	Medium-quality	Genome-fragment	58.59	HMM-based (lower-bound)	0	Lysogenic
SL345444_c_000000000080__full	28400	No	NA	50	18	1	Medium-quality	Genome-fragment	75.82	AAI-based (medium-confidence)	0	Lysogenic
SL345444_c_000000000821	6550	No	NA	5	2	0	High-quality	High-quality	95.81	AAI-based (medium-confidence)	0
SL345444_c_000000001655	4100	No	NA	2	1	0	Medium-quality	Genome-fragment	54.33	AAI-based (medium-confidence)	0
SL345445_c_000000000010__full	70503	Yes	41846	62	15	14	Medium-quality	Genome-fragment	59.57	HMM-based (lower-bound)	40.65	Lysogenic
SL345445_c_000000000020	57222	No	NA	53	0	31	Medium-quality	Genome-fragment	74.65	AAI-based (medium-confidence)	0
SL345445_c_000000000095	25410	No	NA	28	0	7	Medium-quality	Genome-fragment	88.57	AAI-based (medium-confidence)	0
SL345446_c_000000000020__full	66659	No	NA	99	29	0	Complete	High-quality	100	DTR (high-confidence)	0
SL345446_c_000000000023	61602	No	NA	59	0	37	Medium-quality	Genome-fragment	80.36	AAI-based (medium-confidence)	0	Lysogenic
SL345446_c_000000000028__full	56376	No	NA	75	10	1	Complete	High-quality	100	DTR (medium-confidence)	0
SL345446_c_000000000045__full	45336	No	NA	69	25	0	Complete	High-quality	100	DTR (medium-confidence)	0	Lysogenic
SL345446_c_000000000136__full	25112	No	NA	19	6	0	Medium-quality	Genome-fragment	59	AAI-based (medium-confidence)	0
SL345447_c_000000000007__full	56305	No	NA	74	9	1	Complete	High-quality	100	DTR (medium-confidence)	0
SL345447_c_000000000012__full	45208	No	NA	68	25	0	Medium-quality	Genome-fragment	82.98	AAI-based (medium-confidence)	0	Lysogenic
SL345447_c_000000000015__full	42965	No	NA	56	2	1	Medium-quality	Genome-fragment	59.16	HMM-based (lower-bound)	0
SL345447_c_000000000081__full	24254	No	NA	19	6	0	Medium-quality	Genome-fragment	56.99	AAI-based (medium-confidence)	0
SL345447_c_000000000190	16635	No	NA	22	0	13	Medium-quality	Genome-fragment	58.02	AAI-based (medium-confidence)	0
SL345448_c_000000000006__full	66507	No	NA	99	29	0	High-quality	High-quality	99.24	AAI-based (medium-confidence)	0
SL345448_c_000000000008__full	56376	No	NA	75	9	1	Complete	High-quality	100	DTR (medium-confidence)	0
SL345448_c_000000000015__full	45210	No	NA	68	25	0	Medium-quality	Genome-fragment	82.99	AAI-based (medium-confidence)	0	Lysogenic
SL345448_c_000000000018__full	44192	No	NA	50	14	0	High-quality	High-quality	100	AAI-based (medium-confidence)	0
SL345448_c_000000000057	25623	No	NA	24	0	8	Medium-quality	Genome-fragment	60.98	AAI-based (medium-confidence)	0
SL345448_c_000000000066	24308	No	NA	23	0	3	Medium-quality	Genome-fragment	84.73	AAI-based (medium-confidence)	0	Lysogenic
SL345449_c_000000000002__full	94524	No	NA	86	7	2	Medium-quality	Genome-fragment	55.86	AAI-based (medium-confidence)	0
SL345449_c_000000000005__full	46053	No	NA	80	21	0	Medium-quality	Genome-fragment	68.44	AAI-based (medium-confidence)	0
SL345449_c_000000000006__full	45336	No	NA	68	25	0	Complete	High-quality	100	DTR (medium-confidence)	0	Lysogenic
SL345449_c_000000000008__full	38347	No	NA	43	11	0	High-quality	High-quality	90.11	AAI-based (high-confidence)	0
SL345450_c_000000000153	6559	No	NA	4	1	0	Complete	High-quality	100	DTR (high-confidence)	0
SL345455_c_000000000001__full	54946	No	NA	83	28	1	Complete	High-quality	100	DTR (high-confidence)	0	Lysogenic
SL345455_c_000000000002__full	45894	No	NA	66	5	0	Medium-quality	Genome-fragment	57.96	HMM-based (lower-bound)	0
SL345455_c_000000000115	3752	No	NA	3	1	0	Medium-quality	Genome-fragment	54.12	AAI-based (high-confidence)	0
SL345457_c_000000000001__full	51256	No	NA	81	22	0	Medium-quality	Genome-fragment	69.02	HMM-based (lower-bound)	0
SL345457_c_000000000002__full	49608	No	NA	61	11	0	Complete	High-quality	100	DTR (high-confidence)	0	Lysogenic
SL345457_c_000000000003__full	39452	No	NA	55	20	2	Medium-quality	Genome-fragment	54.82	HMM-based (lower-bound)	0
SL345458_c_000000000046__full	42771	No	NA	62	17	2	Complete	High-quality	100	DTR (high-confidence)	0
SL345458_c_000000000117	25944	No	NA	25	0	8	Medium-quality	Genome-fragment	61.74	AAI-based (medium-confidence)	0
SL345461_c_000000000002	36468	No	NA	31	0	16	Medium-quality	Genome-fragment	51.34	AAI-based (medium-confidence)	0
SL345466_c_000000000001__full	45591	No	NA	54	4	0	Medium-quality	Genome-fragment	60.11	HMM-based (lower-bound)	0
SL345468_c_000000000001__full	100614	No	NA	135	9	0	Complete	High-quality	100	DTR (high-confidence)	0
SL345469_c_000000000002	58785	No	NA	55	1	23	Medium-quality	Genome-fragment	59.44	HMM-based (lower-bound)	0
SL345469_c_000000000003	58277	No	NA	53	2	10	High-quality	High-quality	91.55	HMM-based (lower-bound)	0	Lysogenic
SL345469_c_000000000005__full	55760	No	NA	82	12	2	Medium-quality	Genome-fragment	74.51	HMM-based (lower-bound)	0
SL345469_c_000000000011__full	43451	No	NA	57	15	2	Complete	High-quality	100	DTR (high-confidence)	0
SL345480_c_000000000001__full	59615	No	NA	79	54	0	High-quality	High-quality	100	AAI-based (high-confidence)	0
SL345480_c_000000000002	44839	No	NA	39	1	10	Medium-quality	Genome-fragment	73.9	AAI-based (medium-confidence)	0	Lysogenic
SL345480_c_000000000003__full	41859	No	NA	71	21	1	Medium-quality	Genome-fragment	57.18	HMM-based (lower-bound)	0
SL345480_c_000000001461__full	3718	No	NA	3	0	0	Medium-quality	Genome-fragment	88.28	AAI-based (medium-confidence)	0
SL345481_c_000000000001__full	41859	No	NA	71	21	1	Medium-quality	Genome-fragment	57.18	HMM-based (lower-bound)	0
SL345482_c_000000000006__full	41859	No	NA	71	21	1	Medium-quality	Genome-fragment	57.18	HMM-based (lower-bound)	0
SL345482_c_000000000008__full	37953	Yes	30418	55	18	6	Medium-quality	Genome-fragment	50.21	HMM-based (lower-bound)	19.85	Lysogenic
SL345483_c_000000000001	68277	No	NA	68	1	38	Medium-quality	Genome-fragment	50.99	HMM-based (lower-bound)	0
SL345483_c_000000000003__full	41859	No	NA	71	22	1	Medium-quality	Genome-fragment	56.64	HMM-based (lower-bound)	0
SL345483_c_000000000005__full	38308	Yes	34438	65	23	2	Medium-quality	Genome-fragment	54.03	HMM-based (lower-bound)	10.1	Lysogenic
SL345483_c_000000000009__full	31487	No	NA	27	1	6	Medium-quality	Genome-fragment	50.5	HMM-based (lower-bound)	0	Lysogenic
SL345484_c_000000000001__full	41859	No	NA	71	21	1	Medium-quality	Genome-fragment	57.18	HMM-based (lower-bound)	0
SL345484_c_000000002599	2764	No	NA	3	0	0	Medium-quality	Genome-fragment	64.32	AAI-based (high-confidence)	0
SL345488_c_000000000099	5509	No	NA	4	1	0	Medium-quality	Genome-fragment	82.81	AAI-based (medium-confidence)	0
SL345488_c_000000000246	3686	No	NA	4	2	0	Medium-quality	Genome-fragment	55.74	AAI-based (high-confidence)	0
SL345489_c_000000000002	103626	No	NA	95	1	71	High-quality	High-quality	94.38	HMM-based (lower-bound)	0
SL345489_c_000000000141	6516	No	NA	4	1	0	Complete	High-quality	100	DTR (high-confidence)	0
SL345490_c_000000000011	9310	No	NA	5	2	0	High-quality	High-quality	100	AAI-based (medium-confidence)	0
SL345490_c_000000000028	7073	No	NA	4	1	0	Complete	High-quality	100	DTR (high-confidence)	0
SL345490_c_000000000503	3448	No	NA	2	1	0	Medium-quality	Genome-fragment	53.04	AAI-based (medium-confidence)	0
SL345491_c_000000000262	9115	No	NA	8	1	0	Medium-quality	Genome-fragment	84.98	HMM-based (lower-bound)	0
SL345491_c_000000000594	7073	No	NA	4	1	0	Complete	High-quality	100	DTR (high-confidence)	0
SL345491_c_000000000671	6659	No	NA	4	1	0	Complete	High-quality	100	DTR (high-confidence)	0
SL345491_c_000000001343	4953	No	NA	2	1	0	Medium-quality	Genome-fragment	79.7	AAI-based (medium-confidence)	0
SL345491_c_000000001671	4451	No	NA	3	1	0	Medium-quality	Genome-fragment	68.14	AAI-based (high-confidence)	0
SL345491_c_000000001915	4099	No	NA	4	1	0	Medium-quality	Genome-fragment	61.97	AAI-based (medium-confidence)	0
SL345492_c_000000000088	15939	No	NA	14	1	0	High-quality	High-quality	100	HMM-based (lower-bound)	0
SL345492_c_000000000884	7073	No	NA	4	1	0	Complete	High-quality	100	DTR (high-confidence)	0
SL345492_c_000000001015	6639	No	NA	4	2	0	Complete	High-quality	100	DTR (high-confidence)	0
SL345492_c_000000001848	4829	No	NA	3	1	0	Medium-quality	Genome-fragment	75.93	AAI-based (medium-confidence)	0
SL345492_c_000000002468	3985	No	NA	2	1	0	Medium-quality	Genome-fragment	60.88	AAI-based (medium-confidence)	0
SL345492_c_000000002617	3807	No	NA	3	1	0	Medium-quality	Genome-fragment	57.28	AAI-based (medium-confidence)	0
SL345493_c_000000000006	35517	No	NA	35	1	9	High-quality	High-quality	100	HMM-based (lower-bound)	0
SL345493_c_000000000942	7073	No	NA	4	1	0	Complete	High-quality	100	DTR (high-confidence)	0
SL345493_c_000000000962	6998	No	NA	4	2	1	Complete	High-quality	100	DTR (high-confidence)	0
SL345493_c_000000001082	6639	No	NA	4	2	0	Complete	High-quality	100	DTR (high-confidence)	0
SL345494_c_000000000003	7073	No	NA	4	1	0	Complete	High-quality	100	DTR (high-confidence)	0
SL345499_c_000000000001	55295	No	NA	39	1	11	Medium-quality	Genome-fragment	68.08	HMM-based (lower-bound)	0
SL345499_c_000000000004__full	19170	No	NA	28	1	0	Medium-quality	Genome-fragment	63.87	HMM-based (lower-bound)	0
SL345500_c_000000000009	70837	No	NA	65	1	48	High-quality	High-quality	100	HMM-based (lower-bound)	0
SL345500_c_000000000011	68836	No	NA	58	1	46	High-quality	High-quality	100	HMM-based (lower-bound)	0
SL345500_c_000000000037	38691	No	NA	41	1	29	Medium-quality	Genome-fragment	65.12	HMM-based (lower-bound)	0
SL345508_c_000000000023__full	32839	No	NA	42	17	1	Medium-quality	Genome-fragment	56.24	AAI-based (medium-confidence)	0
SL345509_c_000000000014	34757	No	NA	52	21	1	Medium-quality	Genome-fragment	80.63	AAI-based (medium-confidence)	0
SL345515_c_000000000208__full	8161	No	NA	14	1	0	Complete	High-quality	100	DTR (medium-confidence)	0
SL345520_c_000000000154__full	7040	No	NA	12	2	0	Medium-quality	Genome-fragment	59.86	AAI-based (medium-confidence)	0
SL345521_c_000000000429	4375	No	NA	2	1	0	Medium-quality	Genome-fragment	66.97	AAI-based (medium-confidence)	0
SL345522_c_000000000236	5458	No	NA	2	1	0	Medium-quality	Genome-fragment	83.61	AAI-based (medium-confidence)	0
SL345522_c_000000000242	5377	No	NA	4	1	0	Medium-quality	Genome-fragment	50.13	HMM-based (lower-bound)	0
SL345524_c_000000000410	4447	No	NA	2	1	0	Medium-quality	Genome-fragment	68.03	AAI-based (medium-confidence)	0
SL345525_c_000000000001__full	19904	No	NA	37	5	0	Medium-quality	Genome-fragment	84.32	AAI-based (medium-confidence)	0
SL345526_c_000000000002	31048	No	NA	23	1	12	Medium-quality	Genome-fragment	73.87	HMM-based (lower-bound)	0
SL345530_c_000000000001__full	30788	No	NA	45	13	1	Medium-quality	Genome-fragment	77.89	AAI-based (medium-confidence)	0
SL345530_c_000000000002__full	24124	No	NA	34	10	0	Medium-quality	Genome-fragment	53.39	AAI-based (medium-confidence)	0
SL345530_c_000000000020	6527	No	NA	2	2	0	Medium-quality	Genome-fragment	81.36	AAI-based (medium-confidence)	0
SL345532_c_000000000046__full	40542	No	NA	60	12	1	Complete	High-quality	100	DTR (high-confidence)	0
SL345532_c_000000000075__full	33542	No	NA	41	6	0	Medium-quality	Genome-fragment	75.93	AAI-based (medium-confidence)	0
SL345532_c_000000003542	3627	No	NA	2	1	0	Medium-quality	Genome-fragment	54.56	AAI-based (high-confidence)	0
SL345533_c_000000000007	124295	No	NA	111	1	70	High-quality	High-quality	100	HMM-based (lower-bound)	0
SL345533_c_000000000024	67234	No	NA	64	1	46	Medium-quality	Genome-fragment	63.05	HMM-based (lower-bound)	0
SL345533_c_000000000028	61888	No	NA	55	1	32	High-quality	High-quality	100	HMM-based (lower-bound)	0
SL345533_c_000000000090	17487	No	NA	12	0	4	Medium-quality	Genome-fragment	50.43	AAI-based (high-confidence)	0
SL345534_c_000000000002	43279	No	NA	23	1	14	Complete	High-quality	100	DTR (high-confidence)	0
SL345534_c_000000000056	20266	No	NA	16	1	0	Medium-quality	Genome-fragment	50.91	AAI-based (medium-confidence)	0
SL345534_c_000000006569	3560	No	NA	2	1	0	Medium-quality	Genome-fragment	55.56	AAI-based (high-confidence)	0
SL345535_c_000000000001__full	36717	No	NA	49	12	0	Medium-quality	Genome-fragment	78.41	AAI-based (medium-confidence)	0
SL345535_c_000000000002__full	32604	No	NA	37	14	0	Medium-quality	Genome-fragment	75.11	AAI-based (high-confidence)	0
SL345535_c_000000000003__full	21769	No	NA	29	25	0	Medium-quality	Genome-fragment	73.95	AAI-based (high-confidence)	0
SL345536_c_000000000021__full	48946	No	NA	56	10	3	Medium-quality	Genome-fragment	73.2	HMM-based (lower-bound)	0
SL345536_c_000000000029	45488	No	NA	52	2	13	Medium-quality	Genome-fragment	51.37	HMM-based (lower-bound)	0	Lysogenic
SL345537_c_000000000001	185044	No	NA	180	3	98	Medium-quality	Genome-fragment	86.91	HMM-based (lower-bound)	0	Lysogenic
SL345537_c_000000000002	180473	No	NA	177	1	115	High-quality	High-quality	100	HMM-based (lower-bound)	0
SL345537_c_000000000060	47863	No	NA	50	1	23	Medium-quality	Genome-fragment	87.43	HMM-based (lower-bound)	0
SL345537_c_000000000138	26754	No	NA	17	0	7	Medium-quality	Genome-fragment	77.15	AAI-based (high-confidence)	0
SL345538_c_000000000020	122520	No	NA	99	1	25	Medium-quality	Genome-fragment	61.23	HMM-based (lower-bound)	0	Lysogenic
SL345538_c_000000000028__full	97133	No	NA	164	39	1	Medium-quality	Genome-fragment	80.05	AAI-based (medium-confidence)	0	Lysogenic
SL345538_c_000000000031__full	96215	No	NA	137	14	8	Complete	High-quality	100	DTR (high-confidence)	0	Lysogenic
SL345538_c_000000000075__full	69682	Yes	54818	67	19	10	Medium-quality	Genome-fragment	60.65	HMM-based (lower-bound)	21.33	Lysogenic
SL345538_c_000000000149	50842	No	NA	46	1	23	Medium-quality	Genome-fragment	71.27	HMM-based (lower-bound)	0
SL345538_c_000000000154__full	50402	No	NA	79	12	3	Medium-quality	Genome-fragment	73.59	HMM-based (lower-bound)	0	Lysogenic
SL345538_c_000000000165	47762	No	NA	41	0	25	High-quality	High-quality	100	AAI-based (medium-confidence)	0
SL345538_c_000000000181__full	45695	No	NA	61	9	1	Medium-quality	Genome-fragment	56.96	HMM-based (lower-bound)	0
SL345538_c_000000000231__full	40449	No	NA	53	8	0	Complete	High-quality	100	DTR (high-confidence)	0
SL345538_c_000000000257__full	38574	No	NA	60	18	1	High-quality	High-quality	90.3	AAI-based (medium-confidence)	0
SL345538_c_000000000381__full	31216	No	NA	38	14	0	Medium-quality	Genome-fragment	66.34	HMM-based (lower-bound)	0
SL345538_c_000000000446__full	27826	No	NA	37	20	0	Medium-quality	Genome-fragment	50.15	AAI-based (medium-confidence)	0
SL345538_c_000000002726	5913	No	NA	2	1	0	Complete	High-quality	100	DTR (medium-confidence)	0
SL345542_c_000000000001__full	31805	No	NA	41	8	0	Medium-quality	Genome-fragment	67.92	AAI-based (medium-confidence)	0
SL345547_c_000000000001__full	55547	No	NA	83	23	4	Medium-quality	Genome-fragment	73.47	HMM-based (lower-bound)	0
SL345548_c_000000000001__full	46886	No	NA	61	21	1	Complete	High-quality	100	DTR (high-confidence)	0
SL345548_c_000000000002__full	31587	No	NA	31	5	0	Medium-quality	Genome-fragment	63.44	AAI-based (medium-confidence)	0
SL345550_c_000000000527	4209	No	NA	1	1	0	Medium-quality	Genome-fragment	65.66	AAI-based (medium-confidence)	0
SL345554_c_000000000001	1755188	No	NA	1704	5	1161	High-quality	High-quality	100	HMM-based (lower-bound)	0	Lysogenic
SL345558_c_000000000003	82466	No	NA	89	1	61	Medium-quality	Genome-fragment	51.13	HMM-based (lower-bound)	0
SL345558_c_000000000098__full	20772	No	NA	34	9	2	Medium-quality	Genome-fragment	51.81	AAI-based (medium-confidence)	0	Lysogenic
SL345559_c_000000000011	104439	No	NA	85	2	15	Medium-quality	Genome-fragment	52.46	HMM-based (lower-bound)	0	Lysogenic
SL345559_c_000000000056	53079	No	NA	41	1	11	Medium-quality	Genome-fragment	60.16	HMM-based (lower-bound)	0
SL345559_c_000000000086__full	37871	No	NA	67	22	0	High-quality	High-quality	96.88	AAI-based (high-confidence)	0
SL345561_c_000000000084	6231	No	NA	4	2	0	Medium-quality	Genome-fragment	88.15	AAI-based (medium-confidence)	0
SL345563_c_000000000001__full	36067	No	NA	43	17	0	Complete	High-quality	100	DTR (high-confidence)	0
SL345566_c_000000000005__full	44992	No	NA	58	18	2	Medium-quality	Genome-fragment	64.72	HMM-based (lower-bound)	0
SL345566_c_000000000011__full	36459	No	NA	56	14	0	Medium-quality	Genome-fragment	77.95	AAI-based (medium-confidence)	0
SL345566_c_000000000061	20388	No	NA	21	1	5	High-quality	High-quality	100	HMM-based (lower-bound)	0
SL345573_c_000000000001__full	41707	No	NA	56	14	0	Medium-quality	Genome-fragment	89.09	AAI-based (medium-confidence)	0
SL345575_c_000000000002__full	110297	No	NA	101	11	3	Medium-quality	Genome-fragment	82.16	HMM-based (lower-bound)	0	Lysogenic
SL345575_c_000000000011	54131	No	NA	47	1	26	Medium-quality	Genome-fragment	87.09	HMM-based (lower-bound)	0
SL345575_c_000000000061__full	30301	No	NA	26	10	0	Medium-quality	Genome-fragment	79.7	AAI-based (medium-confidence)	0
SL345575_c_000000000066__full	28556	Yes	24174	37	6	4	Medium-quality	Genome-fragment	60.41	AAI-based (medium-confidence)	15.35	Lysogenic
SL345575_c_000000001111	6673	No	NA	5	1	0	Complete	High-quality	100	DTR (high-confidence)	0
SL345575_c_000000001147	6574	No	NA	3	1	0	Medium-quality	Genome-fragment	89.53	AAI-based (medium-confidence)	0
SL345576_c_000000000030	69589	No	NA	44	1	7	High-quality	High-quality	92.58	HMM-based (lower-bound)	0
SL345576_c_000000001492	6570	No	NA	3	1	0	High-quality	High-quality	97.59	AAI-based (medium-confidence)	0
SL345576_c_000000002451	4605	No	NA	4	0	0	Medium-quality	Genome-fragment	70.87	AAI-based (high-confidence)	0
SL345576_c_000000004563	2939	No	NA	5	0	0	Medium-quality	Genome-fragment	54.59	AAI-based (medium-confidence)	0
SL345577_c_000000000070	47156	No	NA	33	1	5	Medium-quality	Genome-fragment	62.74	HMM-based (lower-bound)	0
SL345577_c_000000001167	6548	No	NA	4	1	0	High-quality	High-quality	97.27	AAI-based (medium-confidence)	0
SL345577_c_000000001905	4083	No	NA	2	1	0	Medium-quality	Genome-fragment	60.94	AAI-based (high-confidence)	0
SL345577_c_000000002180	3724	No	NA	4	1	0	Medium-quality	Genome-fragment	58.49	AAI-based (medium-confidence)	0
SL345578_c_000000000016	60001	No	NA	40	1	6	Medium-quality	Genome-fragment	79.82	HMM-based (lower-bound)	0
SL345578_c_000000001765	6558	No	NA	3	1	0	High-quality	High-quality	98.17	AAI-based (medium-confidence)	0
SL345578_c_000000003701	3915	No	NA	5	1	0	Medium-quality	Genome-fragment	57.62	AAI-based (medium-confidence)	0
SL345578_c_000000003923	3711	No	NA	2	1	0	Medium-quality	Genome-fragment	54.41	AAI-based (high-confidence)	0
SL345579_c_000000000014	82951	No	NA	72	1	13	Medium-quality	Genome-fragment	53.55	HMM-based (lower-bound)	0
SL345579_c_000000000033	64103	No	NA	51	1	8	Medium-quality	Genome-fragment	85.28	HMM-based (lower-bound)	0
SL345579_c_000000002376	6566	No	NA	3	1	0	High-quality	High-quality	97.54	AAI-based (medium-confidence)	0
SL345579_c_000000002626	5897	No	NA	6	1	0	Complete	High-quality	100	DTR (medium-confidence)	0
SL345579_c_000000002661	5799	No	NA	2	1	0	Complete	High-quality	100	DTR (medium-confidence)	0
SL345579_c_000000002964	5141	No	NA	1	0	0	Medium-quality	Genome-fragment	82.22	AAI-based (high-confidence)	0
SL345580_c_000000000028	70358	No	NA	55	1	9	High-quality	High-quality	93.6	HMM-based (lower-bound)	0
SL345580_c_000000001220	5714	No	NA	2	1	0	Medium-quality	Genome-fragment	84.88	AAI-based (medium-confidence)	0
SL345580_c_000000001632	3729	No	NA	2	1	0	Medium-quality	Genome-fragment	54.42	AAI-based (high-confidence)	0
SL345582_c_000000000008	51670	No	NA	50	1	29	Medium-quality	Genome-fragment	64.37	HMM-based (lower-bound)	0
SL345583_c_000000000011	34215	No	NA	26	1	22	Medium-quality	Genome-fragment	63.93	HMM-based (lower-bound)	0
SL345583_c_000000000019__full	27972	Yes	23970	36	6	3	Medium-quality	Genome-fragment	59.9	AAI-based (medium-confidence)	14.31	Lysogenic
SL345583_c_000000000037__full	22491	No	NA	20	9	0	Medium-quality	Genome-fragment	59.42	AAI-based (medium-confidence)	0
SL345583_c_000000000478	7100	No	NA	4	1	0	High-quality	High-quality	96.9	AAI-based (medium-confidence)	0
SL345583_c_000000001883	3590	No	NA	4	0	0	Medium-quality	Genome-fragment	54.34	AAI-based (medium-confidence)	0
SL345585_c_000000000042__full	33621	No	NA	40	9	3	Medium-quality	Genome-fragment	85.95	AAI-based (medium-confidence)	0
SL345585_c_000000000643	6673	No	NA	5	1	0	Complete	High-quality	100	DTR (high-confidence)	0
SL345585_c_000000001885	3951	No	NA	4	1	0	Medium-quality	Genome-fragment	54.16	HMM-based (lower-bound)	0
SL345586_c_000000000529	6673	Yes	5474	5	1	1	Complete	High-quality	100	DTR (medium-confidence)	17.97	Lysogenic
SL345587_c_000000000014__full	51327	Yes	31536	58	9	16	Medium-quality	Genome-fragment	64.67	HMM-based (lower-bound)	38.56	Lysogenic
SL345587_c_000000000982	7411	No	NA	7	1	1	High-quality	High-quality	100	AAI-based (medium-confidence)	0
SL345587_c_000000002457	3760	No	NA	2	1	0	Medium-quality	Genome-fragment	59.71	AAI-based (high-confidence)	0
SL345589_c_000000000058__full	5125	No	NA	8	1	0	Medium-quality	Genome-fragment	70.25	HMM-based (lower-bound)	0
SL345590_c_000000000015__full	73021	Yes	34818	87	14	22	Medium-quality	Genome-fragment	60.95	HMM-based (lower-bound)	52.32	Lysogenic
SL345590_c_000000000033__0_partial	29898	No	NA	34	13	1	Medium-quality	Genome-fragment	57.06	AAI-based (medium-confidence)	0
SL345591_c_000000000003	67838	No	NA	67	1	37	Medium-quality	Genome-fragment	59.36	HMM-based (lower-bound)	0
SL345592_c_000000000513	6673	No	NA	5	2	0	Complete	High-quality	100	DTR (high-confidence)	0
SL345593_c_000000000001__full	55799	No	NA	89	13	2	Medium-quality	Genome-fragment	66.06	HMM-based (lower-bound)	0
SL345593_c_000000001610	4132	No	NA	3	1	0	Medium-quality	Genome-fragment	62.58	AAI-based (medium-confidence)	0
SL345594_c_000000000005	100531	No	NA	105	1	68	High-quality	High-quality	100	HMM-based (lower-bound)	0
SL345594_c_000000000008	88797	No	NA	83	0	57	High-quality	High-quality	100	AAI-based (medium-confidence)	0
SL345594_c_000000000023	60253	No	NA	56	1	38	Medium-quality	Genome-fragment	66.08	HMM-based (lower-bound)	0
SL345594_c_000000000035__full	56440	No	NA	89	13	2	Medium-quality	Genome-fragment	66.5	HMM-based (lower-bound)	0
SL345594_c_000000000122	32260	No	NA	28	1	20	Medium-quality	Genome-fragment	63.76	HMM-based (lower-bound)	0
SL345594_c_000000000497	16555	No	NA	20	0	12	Medium-quality	Genome-fragment	57.74	AAI-based (medium-confidence)	0
SL345594_c_000000001688	6837	No	NA	5	2	0	High-quality	High-quality	100	AAI-based (medium-confidence)	0
SL345595_c_000000000162	22585	No	NA	21	0	16	Medium-quality	Genome-fragment	53.74	AAI-based (medium-confidence)	0
SL345595_c_000000001893	6673	No	NA	6	1	1	Complete	High-quality	100	DTR (high-confidence)	0
SL345595_c_000000008700__full	1712	No	NA	3	2	0	Medium-quality	Genome-fragment	78.34	AAI-based (high-confidence)	0
SL345596_c_000000000005	70370	No	NA	71	1	20	Medium-quality	Genome-fragment	71.16	HMM-based (lower-bound)	0
SL345596_c_000000000020__full	56922	No	NA	90	13	2	Medium-quality	Genome-fragment	66.8	HMM-based (lower-bound)	0
SL345596_c_000000000142	29499	No	NA	25	0	18	Medium-quality	Genome-fragment	70.19	AAI-based (medium-confidence)	0
SL345596_c_000000002476	6673	Yes	5628	6	1	1	Complete	High-quality	100	DTR (medium-confidence)	15.66	Lysogenic
SL345597_c_000000000001__full	43502	No	NA	63	14	0	High-quality	High-quality	92.97	AAI-based (medium-confidence)	0
SL345599_c_000000000001	210200	No	NA	186	1	130	Medium-quality	Genome-fragment	81.36	HMM-based (lower-bound)	0	Lysogenic
SL345599_c_000000000002__full	185640	No	NA	205	15	7	High-quality	High-quality	100	AAI-based (medium-confidence)	0
SL345599_c_000000000006	148051	No	NA	125	2	93	High-quality	High-quality	100	HMM-based (lower-bound)	0
SL345599_c_000000000016	96870	No	NA	83	1	50	High-quality	High-quality	100	HMM-based (lower-bound)	0
SL345599_c_000000000031	63406	No	NA	58	1	36	Medium-quality	Genome-fragment	56.37	HMM-based (lower-bound)	0
SL345599_c_000000000080__full	31958	Yes	24170	41	6	6	Medium-quality	Genome-fragment	60.4	AAI-based (medium-confidence)	24.37	Lysogenic
SL345599_c_000000000121	25160	No	NA	21	1	16	Medium-quality	Genome-fragment	53.97	HMM-based (lower-bound)	0
SL345599_c_000000001525	6582	No	NA	5	1	0	Complete	High-quality	100	DTR (high-confidence)	0
SL345600_c_000000000001__full	55670	No	NA	88	13	2	Medium-quality	Genome-fragment	65.95	HMM-based (lower-bound)	0
SL345602_c_000000000001__full	44861	No	NA	63	14	0	High-quality	High-quality	95.86	AAI-based (medium-confidence)	0
SL345607_c_000000000004	148083	No	NA	125	2	93	High-quality	High-quality	100	HMM-based (lower-bound)	0
SL345607_c_000000000009	124606	No	NA	124	1	29	Medium-quality	Genome-fragment	62.95	HMM-based (lower-bound)	0
SL345607_c_000000000020	84232	No	NA	81	1	45	Medium-quality	Genome-fragment	73.71	HMM-based (lower-bound)	0
SL345607_c_000000000023	77745	No	NA	70	1	44	High-quality	High-quality	100	HMM-based (lower-bound)	0
SL345607_c_000000000028	71660	No	NA	39	1	10	Medium-quality	Genome-fragment	89.87	HMM-based (lower-bound)	0	Lysogenic
SL345607_c_000000000039	63406	No	NA	58	1	36	Medium-quality	Genome-fragment	56.37	HMM-based (lower-bound)	0
SL345607_c_000000000042	59997	No	NA	61	1	29	Medium-quality	Genome-fragment	53.34	HMM-based (lower-bound)	0
SL345607_c_000000000059	48293	No	NA	38	1	26	High-quality	High-quality	90.24	HMM-based (lower-bound)	0
SL345607_c_000000000068__0_partial	30419	Yes	23607	40	6	6	Medium-quality	Genome-fragment	58.99	AAI-based (medium-confidence)	22.39	Lysogenic
SL345607_c_000000003052	4362	No	NA	4	0	1	Medium-quality	Genome-fragment	68.67	AAI-based (medium-confidence)	0
SL345610_c_000000000001__full	38428	No	NA	62	14	0	Medium-quality	Genome-fragment	82.11	AAI-based (medium-confidence)	0
SL345611_c_000000000005__full	43812	No	NA	63	14	0	High-quality	High-quality	93.64	AAI-based (medium-confidence)	0
SL345611_c_000000000007	40038	No	NA	32	2	22	Medium-quality	Genome-fragment	65.47	HMM-based (lower-bound)	0
SL345611_c_000000000016__full	31427	No	NA	47	20	0	High-quality	High-quality	93.5	AAI-based (high-confidence)	0
SL345611_c_000000000769__full	2918	No	NA	4	0	0	Medium-quality	Genome-fragment	59.41	AAI-based (medium-confidence)	0
SL345613_c_000000000031	26727	No	NA	25	1	17	Medium-quality	Genome-fragment	50	HMM-based (lower-bound)	0
SL345613_c_000000005885__full	2303	No	NA	4	2	0	Complete	High-quality	100	DTR (high-confidence)	0
SL345614_c_000000001225	1692	No	NA	3	1	0	Medium-quality	Genome-fragment	73.57	HMM-based (lower-bound)	0
SL345615_c_000000000002	330572	No	NA	314	3	213	High-quality	High-quality	100	HMM-based (lower-bound)	0	Lysogenic
SL345615_c_000000000004	210156	No	NA	191	1	140	High-quality	High-quality	100	HMM-based (lower-bound)	0
SL345615_c_000000000011	116708	No	NA	104	1	50	Medium-quality	Genome-fragment	72.36	HMM-based (lower-bound)	0	Lysogenic
SL345615_c_000000000015	90059	No	NA	79	1	57	Medium-quality	Genome-fragment	56.09	HMM-based (lower-bound)	0
SL345615_c_000000000018	75612	No	NA	78	1	53	High-quality	High-quality	96.6	HMM-based (lower-bound)	0	Lysogenic
SL345904_c_000000000025__full	46459	No	NA	66	13	0	Medium-quality	Genome-fragment	54.56	HMM-based (lower-bound)	0
SL345904_c_000000000027__full	45895	No	NA	62	27	1	Medium-quality	Genome-fragment	64.31	HMM-based (lower-bound)	0
SL345905_c_000000000004__full	4845	No	NA	6	5	0	Medium-quality	Genome-fragment	81.12	HMM-based (lower-bound)	0
SL345906_c_000000000005__full	45756	No	NA	62	27	1	Medium-quality	Genome-fragment	64.11	HMM-based (lower-bound)	0
SL345906_c_000000000008__full	36144	No	NA	55	15	0	Medium-quality	Genome-fragment	54.37	HMM-based (lower-bound)	0	Lysogenic
SL345907_c_000000000001	187680	No	NA	165	1	138	High-quality	High-quality	100	HMM-based (lower-bound)	0
SL345907_c_000000000002	169764	No	NA	151	2	112	High-quality	High-quality	100	HMM-based (lower-bound)	0
SL345907_c_000000000012	69579	No	NA	70	1	59	High-quality	High-quality	100	HMM-based (lower-bound)	0
SL345909_c_000000000001__full	68122	No	NA	76	16	1	Medium-quality	Genome-fragment	76.61	HMM-based (lower-bound)	0
SL345909_c_000000000002__full	67596	No	NA	81	14	1	Medium-quality	Genome-fragment	79.33	HMM-based (lower-bound)	0
SL345911_c_000000000006__full	45742	No	NA	62	26	1	Medium-quality	Genome-fragment	64.1	HMM-based (lower-bound)	0
SL345915_c_000000000001	483659	No	NA	438	2	361	High-quality	High-quality	100	HMM-based (lower-bound)	0
SL345915_c_000000000002	285368	No	NA	245	2	193	High-quality	High-quality	100	HMM-based (lower-bound)	0
SL345915_c_000000000003	252827	No	NA	234	1	158	High-quality	High-quality	100	HMM-based (lower-bound)	0
SL345915_c_000000000005	93062	No	NA	80	1	52	High-quality	High-quality	100	HMM-based (lower-bound)	0
SL345915_c_000000000013__full	42476	No	NA	68	18	0	Medium-quality	Genome-fragment	62.83	HMM-based (lower-bound)	0	Lysogenic
SL345916_c_000000000004__full	67604	No	NA	81	14	1	Medium-quality	Genome-fragment	79.13	HMM-based (lower-bound)	0
SL345916_c_000000000013__full	41187	No	NA	41	16	0	Medium-quality	Genome-fragment	72.88	HMM-based (lower-bound)	0
SL345917_c_000000000014	6875	No	NA	5	2	0	Medium-quality	Genome-fragment	64.1	HMM-based (lower-bound)	0
SL345917_c_000000000017	6615	No	NA	1	1	0	Medium-quality	Genome-fragment	61.67	HMM-based (lower-bound)	0
SL345918_c_000000000003	207366	No	NA	174	2	133	High-quality	High-quality	100	HMM-based (lower-bound)	0
SL345918_c_000000000005	167026	No	NA	162	1	110	High-quality	High-quality	100	HMM-based (lower-bound)	0	Lysogenic
SL345918_c_000000000011	114912	No	NA	110	2	93	Medium-quality	Genome-fragment	71.48	HMM-based (lower-bound)	0
SL345918_c_000000000012	106888	No	NA	106	6	83	High-quality	High-quality	100	HMM-based (lower-bound)	0	Lysogenic
SL345918_c_000000000017__full	82638	No	NA	82	27	0	Medium-quality	Genome-fragment	52.75	HMM-based (lower-bound)	0
SL345918_c_000000000021__full	67540	No	NA	81	14	1	Medium-quality	Genome-fragment	79.08	HMM-based (lower-bound)	0
SL345918_c_000000000030__full	53782	No	NA	76	31	0	Medium-quality	Genome-fragment	58.71	HMM-based (lower-bound)	0
SL345918_c_000000000038__full	46704	No	NA	63	39	0	Medium-quality	Genome-fragment	70.01	HMM-based (lower-bound)	0
SL345918_c_000000000043__full	43064	No	NA	70	18	0	Medium-quality	Genome-fragment	63.7	HMM-based (lower-bound)	0	Lysogenic
SL345919_c_000000000004__full	45896	No	NA	61	26	1	Medium-quality	Genome-fragment	64.31	HMM-based (lower-bound)	0
SL345920_c_000000000028	6693	No	NA	4	1	0	Medium-quality	Genome-fragment	62.4	HMM-based (lower-bound)	0
SL345920_c_000000005879__lt2gene	1552	No	NA	2	2	0	Medium-quality	Genome-fragment	58.78	HMM-based (lower-bound)	0
SL345921_c_000000000003__full	67596	No	NA	81	14	1	Medium-quality	Genome-fragment	79.33	HMM-based (lower-bound)	0
SL345921_c_000000000018__full	45897	No	NA	62	27	1	Medium-quality	Genome-fragment	63.73	HMM-based (lower-bound)	0
SL345921_c_000000000035__full	38407	No	NA	62	17	0	Medium-quality	Genome-fragment	57.18	HMM-based (lower-bound)	0
SL345921_c_000000000081	28241	No	NA	29	1	21	Medium-quality	Genome-fragment	61.71	HMM-based (lower-bound)	0
SL345924_c_000000000002__full	7872	No	NA	8	7	0	High-quality	High-quality	97.66	HMM-based (lower-bound)	0
SL345924_c_000000000003	6692	No	NA	4	2	0	Medium-quality	Genome-fragment	62.39	HMM-based (lower-bound)	0
SL345925_c_000000000015	6145	No	NA	5	1	0	Medium-quality	Genome-fragment	57.29	HMM-based (lower-bound)	0
SL345926_c_000000000021	6614	No	NA	4	2	0	Medium-quality	Genome-fragment	61.66	HMM-based (lower-bound)	0
SL345926_c_000000000026	6145	No	NA	4	1	0	Medium-quality	Genome-fragment	57.29	HMM-based (lower-bound)	0
SL345929_c_000000000004__full	45895	No	NA	62	26	1	Medium-quality	Genome-fragment	64.31	HMM-based (lower-bound)	0
SL345930_c_000000000001__full	198029	No	NA	266	47	13	Medium-quality	Genome-fragment	66.8	HMM-based (lower-bound)	0
SL345930_c_000000000002__full	82979	No	NA	107	25	0	Medium-quality	Genome-fragment	54.2	HMM-based (lower-bound)	0
SL345930_c_000000000004__full	60385	No	NA	80	31	2	Complete	High-quality	100	DTR (medium-confidence)	0	Lysogenic
SL345930_c_000000000006__full	46733	No	NA	52	9	1	Medium-quality	Genome-fragment	63.58	HMM-based (lower-bound)	0	Lysogenic
SL345931_c_000000000063	12226	No	NA	22	3	0	Medium-quality	Genome-fragment	55.64	HMM-based (lower-bound)	0
SL345931_c_000000000077__full	11103	No	NA	16	9	0	Medium-quality	Genome-fragment	52.55	HMM-based (lower-bound)	0
SL345933_c_000000000001__full	68013	No	NA	82	15	1	Medium-quality	Genome-fragment	79.64	HMM-based (lower-bound)	0
SL345934_c_000000000001__full	67596	No	NA	81	14	1	Medium-quality	Genome-fragment	79.33	HMM-based (lower-bound)	0
SL345936_c_000000000005__full	56213	No	NA	58	10	1	Medium-quality	Genome-fragment	73.35	HMM-based (lower-bound)	0
SL345936_c_000000000007__full	45813	No	NA	62	25	1	Medium-quality	Genome-fragment	64.48	HMM-based (lower-bound)	0
SL345937_c_000000000008	6020	No	NA	4	1	0	Medium-quality	Genome-fragment	56.12	HMM-based (lower-bound)	0
SL345938_c_000000000004	6693	No	NA	4	1	0	Medium-quality	Genome-fragment	62.4	HMM-based (lower-bound)	0
SL345939_c_000000000031	6768	No	NA	3	1	0	Medium-quality	Genome-fragment	63.1	HMM-based (lower-bound)	0
SL345939_c_000000000044	6145	No	NA	5	2	0	Medium-quality	Genome-fragment	57.29	HMM-based (lower-bound)	0
SL345940_c_000000000001	131259	No	NA	118	1	91	High-quality	High-quality	100	HMM-based (lower-bound)	0
SL345940_c_000000000003	76520	No	NA	63	1	42	High-quality	High-quality	100	HMM-based (lower-bound)	0
SL345940_c_000000000009__full	55893	No	NA	70	10	1	Medium-quality	Genome-fragment	68.6	HMM-based (lower-bound)	0
SL345940_c_000000000012	46432	No	NA	43	1	36	Medium-quality	Genome-fragment	67.87	HMM-based (lower-bound)	0
SL345940_c_000000000013__full	46353	No	NA	55	17	0	Medium-quality	Genome-fragment	81.18	HMM-based (lower-bound)	0
SL345943_c_000000000006	6693	No	NA	3	1	0	Medium-quality	Genome-fragment	62.4	HMM-based (lower-bound)	0
SL345945_c_000000000002__full	49720	No	NA	69	31	0	Medium-quality	Genome-fragment	54.27	HMM-based (lower-bound)	0
SL345946_c_000000000005__full	67438	No	NA	81	14	1	Medium-quality	Genome-fragment	79.22	HMM-based (lower-bound)	0
SL345946_c_000000000009__full	49858	No	NA	76	7	1	Medium-quality	Genome-fragment	57.9	HMM-based (lower-bound)	0
SL345946_c_000000000034	37593	No	NA	36	1	27	Medium-quality	Genome-fragment	82.15	HMM-based (lower-bound)	0
SL345950_c_000000000001	575934	No	NA	539	2	376	High-quality	High-quality	97.22	HMM-based (lower-bound)	0	Lysogenic
SL345950_c_000000000008	136946	No	NA	116	2	83	High-quality	High-quality	100	HMM-based (lower-bound)	0
SL345950_c_000000000009__full	129082	No	NA	145	39	1	Medium-quality	Genome-fragment	83.08	HMM-based (lower-bound)	0
SL345950_c_000000000014	114919	No	NA	110	2	93	Medium-quality	Genome-fragment	71.48	HMM-based (lower-bound)	0
SL345950_c_000000000020	93824	No	NA	85	1	46	High-quality	High-quality	100	HMM-based (lower-bound)	0
SL345950_c_000000000032__full	68130	No	NA	76	16	1	Medium-quality	Genome-fragment	76.61	HMM-based (lower-bound)	0
SL345950_c_000000000044	60778	No	NA	55	2	35	Medium-quality	Genome-fragment	86.19	HMM-based (lower-bound)	0
SL345950_c_000000000048__full	55891	No	NA	70	10	1	Medium-quality	Genome-fragment	68.59	HMM-based (lower-bound)	0
SL345950_c_000000000051__full	53763	No	NA	76	31	0	Medium-quality	Genome-fragment	58.69	HMM-based (lower-bound)	0
SL345950_c_000000000073__full	38071	No	NA	52	11	0	Medium-quality	Genome-fragment	54.79	HMM-based (lower-bound)	0	Lysogenic
SL345951_c_000000000001__full	68196	No	NA	114	36	0	Medium-quality	Genome-fragment	79.14	HMM-based (lower-bound)	0	Lysogenic
SL345954_c_000000000001	483770	No	NA	438	2	361	High-quality	High-quality	100	HMM-based (lower-bound)	0
SL345954_c_000000000002	280530	No	NA	243	2	191	High-quality	High-quality	100	HMM-based (lower-bound)	0
SL345954_c_000000000003	253208	No	NA	234	1	158	High-quality	High-quality	100	HMM-based (lower-bound)	0
SL345954_c_000000000005	93062	No	NA	80	1	52	High-quality	High-quality	100	HMM-based (lower-bound)	0
SL345955_c_000000000004__full	55893	No	NA	70	10	1	Medium-quality	Genome-fragment	68.6	HMM-based (lower-bound)	0
SL345955_c_000000000007__full	46941	No	NA	63	39	0	Medium-quality	Genome-fragment	70.37	HMM-based (lower-bound)	0
SL345955_c_000000000008__full	46518	No	NA	55	17	0	Complete	High-quality	100	DTR (medium-confidence)	0
SL345956_c_000000000006	6145	No	NA	5	1	0	Medium-quality	Genome-fragment	57.29	HMM-based (lower-bound)	0
SL345957_c_000000000001	465507	No	NA	418	2	346	High-quality	High-quality	100	HMM-based (lower-bound)	0
SL345957_c_000000000012__full	49184	No	NA	82	29	0	Medium-quality	Genome-fragment	63.1	HMM-based (lower-bound)	0
SL345958_c_000000000009__full	67596	No	NA	81	14	1	Medium-quality	Genome-fragment	79.33	HMM-based (lower-bound)	0
SL345959_c_000000000001	483561	No	NA	438	2	361	High-quality	High-quality	100	HMM-based (lower-bound)	0
SL345959_c_000000000002	252853	No	NA	234	1	158	High-quality	High-quality	100	HMM-based (lower-bound)	0
SL345959_c_000000000003	175177	No	NA	153	2	114	High-quality	High-quality	100	HMM-based (lower-bound)	0
SL345959_c_000000000006	93034	No	NA	79	1	52	High-quality	High-quality	100	HMM-based (lower-bound)	0
SL345959_c_000000000013__full	29411	No	NA	44	39	0	High-quality	High-quality	91.94	HMM-based (lower-bound)	0
SL345959_c_000000001764__full	2131	No	NA	2	1	0	Medium-quality	Genome-fragment	51.21	HMM-based (lower-bound)	0
SL345963_c_000000000001__full	43627	No	NA	68	19	1	Medium-quality	Genome-fragment	62.36	HMM-based (lower-bound)	0	Lysogenic
SL345963_c_000000000002__full	17710	No	NA	22	6	0	Medium-quality	Genome-fragment	59.61	HMM-based (lower-bound)	0
SL345964_c_000000000001	483475	No	NA	438	2	361	High-quality	High-quality	100	HMM-based (lower-bound)	0
SL345964_c_000000000002	214490	No	NA	202	1	133	High-quality	High-quality	100	HMM-based (lower-bound)	0
SL345964_c_000000000004	93040	No	NA	79	1	52	High-quality	High-quality	100	HMM-based (lower-bound)	0
SL345964_c_000000000011__full	49184	No	NA	82	29	0	Medium-quality	Genome-fragment	63.1	HMM-based (lower-bound)	0
SL345964_c_000000000015__full	29150	No	NA	43	38	0	High-quality	High-quality	91.12	HMM-based (lower-bound)	0
SL345964_c_000000000210__full	5095	No	NA	5	1	0	High-quality	High-quality	100	HMM-based (lower-bound)	0	Lysogenic
SL345966_c_000000000192	6543	No	NA	3	1	0	Medium-quality	Genome-fragment	61	HMM-based (lower-bound)	0
SL345966_c_000000000216	5619	No	NA	1	1	0	Medium-quality	Genome-fragment	52.39	HMM-based (lower-bound)	0
SL345966_c_000000000227	5370	No	NA	3	3	0	Medium-quality	Genome-fragment	51.09	HMM-based (lower-bound)	0
SL345969_c_000000000001__full	53878	No	NA	77	32	0	Medium-quality	Genome-fragment	58.81	HMM-based (lower-bound)	0
SL345971_c_000000000001__full	58408	No	NA	64	10	1	Medium-quality	Genome-fragment	75.8	HMM-based (lower-bound)	0
SL345972_c_000000000001__full	64266	No	NA	77	8	8	Complete	High-quality	100	DTR (high-confidence)	0	Lysogenic
SL345973_c_000000000002	7489	No	NA	2	1	0	Medium-quality	Genome-fragment	69.82	HMM-based (lower-bound)	0
SL345973_c_000000000005	6552	No	NA	4	1	0	Medium-quality	Genome-fragment	61.08	HMM-based (lower-bound)	0
SL345973_c_000000000006	6145	No	NA	5	1	0	Medium-quality	Genome-fragment	57.29	HMM-based (lower-bound)	0
SL345975_c_000000000001	324451	No	NA	291	2	239	High-quality	High-quality	100	HMM-based (lower-bound)	0
SL345975_c_000000000003	175116	No	NA	153	2	114	High-quality	High-quality	100	HMM-based (lower-bound)	0
SL345976_c_000000000001	324411	No	NA	291	2	239	High-quality	High-quality	100	HMM-based (lower-bound)	0
SL345976_c_000000000002	253170	No	NA	234	1	158	High-quality	High-quality	100	HMM-based (lower-bound)	0
SL345976_c_000000000003	188651	No	NA	166	2	123	High-quality	High-quality	100	HMM-based (lower-bound)	0
SL345976_c_000000000007	95564	No	NA	80	1	52	Complete	High-quality	100	DTR (high-confidence)	0
SL345977_c_000000000011	54067	No	NA	51	1	41	Medium-quality	Genome-fragment	79.03	HMM-based (lower-bound)	0
SL345977_c_000000000041__full	20945	No	NA	26	23	0	Medium-quality	Genome-fragment	62.96	HMM-based (lower-bound)	0
SL345977_c_000000006785__full	1164	No	NA	2	1	0	Medium-quality	Genome-fragment	50.61	HMM-based (lower-bound)	0
SL345978_c_000000000003	6145	No	NA	4	1	0	Medium-quality	Genome-fragment	57.29	HMM-based (lower-bound)	0
SL345981_c_000000000001	170171	No	NA	151	2	112	High-quality	High-quality	100	HMM-based (lower-bound)	0
SL345981_c_000000000013	49888	No	NA	43	1	29	Medium-quality	Genome-fragment	83.43	HMM-based (lower-bound)	0
SL345981_c_000000000014__full	49184	No	NA	82	30	0	Medium-quality	Genome-fragment	63.1	HMM-based (lower-bound)	0
SL345981_c_000000000016__full	46704	No	NA	63	40	0	Medium-quality	Genome-fragment	70.01	HMM-based (lower-bound)	0
SL345981_c_000000000020__full	40685	No	NA	36	5	1	Medium-quality	Genome-fragment	56.67	HMM-based (lower-bound)	0
SL345981_c_000000000034	27814	No	NA	30	1	17	Medium-quality	Genome-fragment	60.56	HMM-based (lower-bound)	0
SL345981_c_000000001098__full	4296	No	NA	4	1	0	High-quality	High-quality	100	HMM-based (lower-bound)	0	Lysogenic
SL345982_c_000000000002	220739	No	NA	203	2	123	High-quality	High-quality	100	HMM-based (lower-bound)	0
SL345982_c_000000000017	76883	No	NA	75	1	48	Medium-quality	Genome-fragment	68.82	HMM-based (lower-bound)	0
SL345982_c_000000000019__full	68130	No	NA	76	16	1	Medium-quality	Genome-fragment	76.61	HMM-based (lower-bound)	0
SL345982_c_000000000020__full	67594	No	NA	81	14	1	Medium-quality	Genome-fragment	79.33	HMM-based (lower-bound)	0
SL345983_c_000000000012	11685	No	NA	8	1	0	High-quality	High-quality	100	HMM-based (lower-bound)	0
SL345983_c_000000000144	6693	No	NA	4	1	0	Medium-quality	Genome-fragment	62.4	HMM-based (lower-bound)	0
SL345983_c_000000000301	5649	No	NA	2	1	0	Medium-quality	Genome-fragment	52.67	HMM-based (lower-bound)	0
SL345984_c_000000000003	151160	No	NA	136	2	99	High-quality	High-quality	100	HMM-based (lower-bound)	0
SL345985_c_000000000008	6693	No	NA	4	2	0	Medium-quality	Genome-fragment	62.4	HMM-based (lower-bound)	0
SL345987_c_000000000005	6145	No	NA	4	1	0	Medium-quality	Genome-fragment	57.29	HMM-based (lower-bound)	0
SL345987_c_000000000007	5804	No	NA	4	1	0	Medium-quality	Genome-fragment	54.11	HMM-based (lower-bound)	0
SL345989_c_000000000001__full	46704	No	NA	63	40	0	Medium-quality	Genome-fragment	70.01	HMM-based (lower-bound)	0
SL345989_c_000000000002__full	43980	No	NA	59	35	0	Medium-quality	Genome-fragment	77.7	HMM-based (lower-bound)	0
SL345990_c_000000000022	6145	No	NA	4	1	0	Medium-quality	Genome-fragment	57.29	HMM-based (lower-bound)	0
SL345992_c_000000000002	61780	No	NA	61	1	15	High-quality	High-quality	100	HMM-based (lower-bound)	0	Lysogenic
SL345992_c_000000000359	7056	No	NA	3	1	0	Medium-quality	Genome-fragment	65.78	HMM-based (lower-bound)	0
SL345993_c_000000000004__full	68247	No	NA	115	36	0	Medium-quality	Genome-fragment	79.15	HMM-based (lower-bound)	0	Lysogenic
SL345993_c_000000000009__full	56291	Yes	38942	74	15	15	Medium-quality	Genome-fragment	52.43	HMM-based (lower-bound)	30.82	Lysogenic
SL345993_c_000000000011__full	53576	Yes	44955	86	19	6	Medium-quality	Genome-fragment	64.66	HMM-based (lower-bound)	16.09	Lysogenic
SL345994_c_000000000001__full	68117	No	NA	113	27	2	Complete	High-quality	100	DTR (high-confidence)	0
SL345995_c_000000000001	258977	No	NA	241	1	173	High-quality	High-quality	100	HMM-based (lower-bound)	0	Lysogenic
SL345995_c_000000000007	135257	No	NA	115	2	82	High-quality	High-quality	100	HMM-based (lower-bound)	0
SL345995_c_000000000012	85129	No	NA	85	1	73	Medium-quality	Genome-fragment	77.53	HMM-based (lower-bound)	0
SL345995_c_000000000017__full	61528	No	NA	64	3	2	Medium-quality	Genome-fragment	68.13	HMM-based (lower-bound)	0
SL345995_c_000000000023__full	46416	No	NA	55	17	0	Medium-quality	Genome-fragment	81.29	HMM-based (lower-bound)	0
SL345995_c_000000000024__full	45837	No	NA	45	9	1	Medium-quality	Genome-fragment	54.64	HMM-based (lower-bound)	0
SL345995_c_000000000030__full	37574	No	NA	63	21	0	Medium-quality	Genome-fragment	55.24	HMM-based (lower-bound)	0	Lysogenic
SL345996_c_000000000001	290510	No	NA	270	1	223	High-quality	High-quality	100	HMM-based (lower-bound)	0
SL345996_c_000000000002	252819	No	NA	235	1	158	High-quality	High-quality	100	HMM-based (lower-bound)	0
SL345996_c_000000000003	224326	No	NA	192	1	155	High-quality	High-quality	100	HMM-based (lower-bound)	0
SL345996_c_000000000004	188695	No	NA	166	2	123	High-quality	High-quality	100	HMM-based (lower-bound)	0
SL345996_c_000000000007	93062	No	NA	80	1	52	High-quality	High-quality	100	HMM-based (lower-bound)	0
SL345996_c_000000000012__full	49184	No	NA	82	29	0	Medium-quality	Genome-fragment	63.1	HMM-based (lower-bound)	0
SL345998_c_000000000003	212923	No	NA	188	1	134	High-quality	High-quality	100	HMM-based (lower-bound)	0	Lysogenic
SL345998_c_000000000005	185074	No	NA	175	1	115	High-quality	High-quality	100	HMM-based (lower-bound)	0
SL345998_c_000000000007	172111	No	NA	158	1	92	High-quality	High-quality	100	HMM-based (lower-bound)	0
SL345998_c_000000000018	75965	No	NA	74	1	48	Medium-quality	Genome-fragment	68	HMM-based (lower-bound)	0
SL345998_c_000000000023__full	67596	No	NA	81	14	1	Medium-quality	Genome-fragment	79.33	HMM-based (lower-bound)	0
SL345998_c_000000000024__full	67355	No	NA	68	2	10	Medium-quality	Genome-fragment	82.35	HMM-based (lower-bound)	0	Lysogenic
SL345998_c_000000000032	59208	No	NA	55	2	42	Medium-quality	Genome-fragment	65.57	HMM-based (lower-bound)	0
SL346079_c_000000000026	6145	No	NA	5	1	0	Medium-quality	Genome-fragment	57.29	HMM-based (lower-bound)	0
SL346080_c_000000000002	346808	No	NA	321	1	237	High-quality	High-quality	100	HMM-based (lower-bound)	0
SL346080_c_000000000003	302828	No	NA	278	3	201	High-quality	High-quality	100	HMM-based (lower-bound)	0
SL346080_c_000000000006	193306	No	NA	170	1	107	High-quality	High-quality	100	HMM-based (lower-bound)	0
SL346080_c_000000000083	26641	No	NA	28	1	16	Medium-quality	Genome-fragment	58	HMM-based (lower-bound)	0
SL346080_c_000000000139__full	16051	No	NA	22	10	0	Medium-quality	Genome-fragment	72.72	HMM-based (lower-bound)	0	Lysogenic
SL346081_c_000000000001	210227	No	NA	190	1	146	High-quality	High-quality	100	HMM-based (lower-bound)	0
SL346081_c_000000000023__full	40841	No	NA	68	25	1	Medium-quality	Genome-fragment	61.54	HMM-based (lower-bound)	0	Lysogenic
SL346081_c_000000000049__full	25189	No	NA	40	17	0	Medium-quality	Genome-fragment	55.56	HMM-based (lower-bound)	0
SL346081_c_000000000123__full	16051	No	NA	22	11	0	Medium-quality	Genome-fragment	72.72	HMM-based (lower-bound)	0	Lysogenic
SL346082_c_000000000001	259913	No	NA	239	2	171	High-quality	High-quality	100	HMM-based (lower-bound)	0
SL346082_c_000000000023__full	40841	No	NA	68	25	1	Medium-quality	Genome-fragment	61.54	HMM-based (lower-bound)	0	Lysogenic
SL346082_c_000000000099__full	16051	No	NA	22	10	0	Medium-quality	Genome-fragment	72.72	HMM-based (lower-bound)	0	Lysogenic
SL346083_c_000000000021__full	46628	No	NA	66	21	0	Medium-quality	Genome-fragment	69.88	HMM-based (lower-bound)	0
SL346083_c_000000000028__full	40841	No	NA	68	25	1	Medium-quality	Genome-fragment	61.54	HMM-based (lower-bound)	0	Lysogenic
SL346083_c_000000000170__full	16051	No	NA	22	10	0	Medium-quality	Genome-fragment	72.72	HMM-based (lower-bound)	0	Lysogenic
SL346084_c_000000000156__full	12074	No	NA	15	9	0	Medium-quality	Genome-fragment	53.27	HMM-based (lower-bound)	0
SL346085_c_000000000001	209302	No	NA	188	1	145	High-quality	High-quality	100	HMM-based (lower-bound)	0
SL346085_c_000000000026__full	46452	No	NA	66	21	0	Medium-quality	Genome-fragment	69.61	HMM-based (lower-bound)	0
SL346085_c_000000000196__full	16051	No	NA	22	11	0	Medium-quality	Genome-fragment	72.72	HMM-based (lower-bound)	0	Lysogenic
SL346086_c_000000000001__full	41090	No	NA	45	29	0	Complete	High-quality	100	DTR (medium-confidence)	0
SL346087_c_000000000001	317198	No	NA	288	1	207	High-quality	High-quality	100	HMM-based (lower-bound)	0	Lysogenic
SL346087_c_000000000009	107747	No	NA	94	2	64	High-quality	High-quality	98.43	HMM-based (lower-bound)	0
SL346087_c_000000000012	79174	No	NA	75	1	65	Medium-quality	Genome-fragment	72.11	HMM-based (lower-bound)	0
SL346087_c_000000000014__full	67596	No	NA	81	15	1	Medium-quality	Genome-fragment	79.33	HMM-based (lower-bound)	0
SL346088_c_000000000012__full	65042	Yes	34238	77	23	20	Medium-quality	Genome-fragment	58.55	HMM-based (lower-bound)	47.36	Lysogenic
SL346088_c_000000000022__full	40689	No	NA	67	25	1	Medium-quality	Genome-fragment	61.33	HMM-based (lower-bound)	0	Lysogenic
SL346088_c_000000000082__full	16051	No	NA	22	10	0	Medium-quality	Genome-fragment	72.72	HMM-based (lower-bound)	0	Lysogenic
SL346090_c_000000000001__full	59008	No	NA	76	32	0	Medium-quality	Genome-fragment	82	HMM-based (lower-bound)	0
SL346090_c_000000000002__full	53177	No	NA	63	35	1	Medium-quality	Genome-fragment	73.61	HMM-based (lower-bound)	0
SL346091_c_000000000001__full	29116	No	NA	42	39	0	High-quality	High-quality	90.2	HMM-based (lower-bound)	0
SL346092_c_000000000002	278576	No	NA	253	1	190	High-quality	High-quality	100	HMM-based (lower-bound)	0
SL346092_c_000000000024__full	40841	No	NA	67	25	1	Medium-quality	Genome-fragment	61.54	HMM-based (lower-bound)	0	Lysogenic
SL346092_c_000000000135__full	16051	No	NA	22	10	0	Medium-quality	Genome-fragment	72.72	HMM-based (lower-bound)	0	Lysogenic
SL346094_c_000000000001__0_partial	78318	Yes	38591	91	25	28	Medium-quality	Genome-fragment	64.57	HMM-based (lower-bound)	50.73	Lysogenic
SL346094_c_000000000015__full	40841	No	NA	68	25	1	Medium-quality	Genome-fragment	61.54	HMM-based (lower-bound)	0	Lysogenic
SL346094_c_000000000077__full	17177	No	NA	23	10	1	Medium-quality	Genome-fragment	77.34	HMM-based (lower-bound)	0	Lysogenic
SL346094_c_000000001564__full	3040	No	NA	4	1	0	Medium-quality	Genome-fragment	73.05	HMM-based (lower-bound)	0
SL346095_c_000000000001	324409	No	NA	291	2	239	High-quality	High-quality	100	HMM-based (lower-bound)	0
SL346095_c_000000000003	124035	No	NA	106	1	86	High-quality	High-quality	100	HMM-based (lower-bound)	0
SL346095_c_000000000048__full	22082	No	NA	28	22	0	Medium-quality	Genome-fragment	65.03	HMM-based (lower-bound)	0
SL346096_c_000000000001__full	41062	No	NA	68	25	1	Medium-quality	Genome-fragment	61.84	HMM-based (lower-bound)	0	Lysogenic
SL346097_c_000000000028__full	40841	No	NA	68	25	1	Medium-quality	Genome-fragment	61.54	HMM-based (lower-bound)	0	Lysogenic
SL346097_c_000000000031__full	37522	No	NA	50	14	0	Medium-quality	Genome-fragment	50.8	HMM-based (lower-bound)	0
SL346097_c_000000000191__full	16051	No	NA	22	10	0	Medium-quality	Genome-fragment	72.72	HMM-based (lower-bound)	0	Lysogenic
SL346098_c_000000000001	364540	No	NA	322	1	256	High-quality	High-quality	100	HMM-based (lower-bound)	0
SL346098_c_000000000017__full	54814	No	NA	71	21	0	Medium-quality	Genome-fragment	73.79	HMM-based (lower-bound)	0
SL346098_c_000000000025__full	45740	No	NA	68	29	3	Medium-quality	Genome-fragment	88.08	HMM-based (lower-bound)	0
SL346098_c_000000000036__full	40841	No	NA	68	25	1	Medium-quality	Genome-fragment	61.54	HMM-based (lower-bound)	0	Lysogenic
SL346098_c_000000000046__full	35769	No	NA	51	16	0	Medium-quality	Genome-fragment	55.29	HMM-based (lower-bound)	0
SL346098_c_000000000267__full	16051	No	NA	22	10	0	Medium-quality	Genome-fragment	72.72	HMM-based (lower-bound)	0	Lysogenic
SL346099_c_000000000017	50241	No	NA	55	1	33	Medium-quality	Genome-fragment	75.16	HMM-based (lower-bound)	0
SL346099_c_000000000030__full	40841	No	NA	68	26	1	Medium-quality	Genome-fragment	61.54	HMM-based (lower-bound)	0	Lysogenic
SL346099_c_000000000215__full	16051	No	NA	22	11	0	Medium-quality	Genome-fragment	72.72	HMM-based (lower-bound)	0	Lysogenic
SL346100_c_000000000001	261290	No	NA	234	2	192	High-quality	High-quality	100	HMM-based (lower-bound)	0
SL346100_c_000000000002	214208	No	NA	204	1	135	High-quality	High-quality	100	HMM-based (lower-bound)	0
SL346100_c_000000000003__0_partial	78318	Yes	38591	91	25	28	Medium-quality	Genome-fragment	64.57	HMM-based (lower-bound)	50.73	Lysogenic
SL346100_c_000000000008	92912	No	NA	79	1	52	High-quality	High-quality	100	HMM-based (lower-bound)	0
SL346100_c_000000000036__full	40841	No	NA	68	25	1	Medium-quality	Genome-fragment	61.54	HMM-based (lower-bound)	0	Lysogenic
SL346100_c_000000000154__full	16051	No	NA	22	10	0	Medium-quality	Genome-fragment	72.72	HMM-based (lower-bound)	0	Lysogenic
SL346100_c_000000001743__full	3432	No	NA	4	1	0	Medium-quality	Genome-fragment	82.47	HMM-based (lower-bound)	0	Lysogenic
SL346101_c_000000000031__full	40841	No	NA	68	25	1	Medium-quality	Genome-fragment	61.54	HMM-based (lower-bound)	0	Lysogenic
SL346101_c_000000000078__full	16051	No	NA	22	10	0	Medium-quality	Genome-fragment	72.72	HMM-based (lower-bound)	0	Lysogenic
SL346102_c_000000000001__full	52040	No	NA	101	37	0	Medium-quality	Genome-fragment	62.76	HMM-based (lower-bound)	0
SL346103_c_000000000002	395135	No	NA	330	2	247	High-quality	High-quality	100	HMM-based (lower-bound)	0
SL346103_c_000000000003	283767	No	NA	263	1	186	High-quality	High-quality	100	HMM-based (lower-bound)	0	Lysogenic
SL346103_c_000000000008	114933	No	NA	110	2	93	Medium-quality	Genome-fragment	71.48	HMM-based (lower-bound)	0
SL346103_c_000000000016	75327	No	NA	77	2	52	High-quality	High-quality	93.33	HMM-based (lower-bound)	0
SL346103_c_000000000022__full	67596	No	NA	81	14	1	Medium-quality	Genome-fragment	79.33	HMM-based (lower-bound)	0
SL346103_c_000000000027	60880	No	NA	51	1	41	High-quality	High-quality	100	HMM-based (lower-bound)	0
SL346103_c_000000000058__full	40486	No	NA	66	18	0	Medium-quality	Genome-fragment	59.89	HMM-based (lower-bound)	0
SL346103_c_000000000061	39795	No	NA	38	2	22	Medium-quality	Genome-fragment	59.23	HMM-based (lower-bound)	0
SL346103_c_000000000118	25491	No	NA	27	1	12	Medium-quality	Genome-fragment	55.5	HMM-based (lower-bound)	0
SL346104_c_000000000074__full	16051	No	NA	22	11	0	Medium-quality	Genome-fragment	72.72	HMM-based (lower-bound)	0	Lysogenic
SL346105_c_000000000001	514744	No	NA	461	2	374	High-quality	High-quality	100	HMM-based (lower-bound)	0
SL346105_c_000000000002__0_partial	82160	Yes	40136	104	26	25	Medium-quality	Genome-fragment	66.55	HMM-based (lower-bound)	51.15	Lysogenic
SL346105_c_000000000003	253184	No	NA	237	1	160	High-quality	High-quality	100	HMM-based (lower-bound)	0
SL346105_c_000000000006	92899	No	NA	79	1	52	High-quality	High-quality	100	HMM-based (lower-bound)	0
SL346105_c_000000000014__full	63058	No	NA	82	13	0	Complete	High-quality	100	DTR (medium-confidence)	0
SL346105_c_000000000060__full	16051	No	NA	22	10	0	Medium-quality	Genome-fragment	72.72	HMM-based (lower-bound)	0	Lysogenic
SL346106_c_000000000001	419069	No	NA	375	1	293	High-quality	High-quality	100	HMM-based (lower-bound)	0
SL346106_c_000000000002	368652	No	NA	333	1	230	High-quality	High-quality	100	HMM-based (lower-bound)	0
SL346106_c_000000000008	178458	No	NA	167	2	115	High-quality	High-quality	100	HMM-based (lower-bound)	0
SL346106_c_000000000055__full	40841	No	NA	67	25	1	Medium-quality	Genome-fragment	61.54	HMM-based (lower-bound)	0	Lysogenic
SL346106_c_000000000082__full	30936	No	NA	48	21	0	Medium-quality	Genome-fragment	67.98	HMM-based (lower-bound)	0
SL346106_c_000000000270__full	16051	No	NA	22	10	0	Medium-quality	Genome-fragment	72.72	HMM-based (lower-bound)	0	Lysogenic
SL346107_c_000000000004	102828	No	NA	93	1	76	High-quality	High-quality	100	HMM-based (lower-bound)	0
SL346107_c_000000000021__full	46628	No	NA	66	22	0	Medium-quality	Genome-fragment	69.88	HMM-based (lower-bound)	0
SL346107_c_000000000029__full	40841	No	NA	68	25	1	Medium-quality	Genome-fragment	61.54	HMM-based (lower-bound)	0	Lysogenic
SL346107_c_000000000217__full	16051	No	NA	22	11	0	Medium-quality	Genome-fragment	72.72	HMM-based (lower-bound)	0	Lysogenic
SL346108_c_000000000011__full	40689	No	NA	67	25	1	Medium-quality	Genome-fragment	61.33	HMM-based (lower-bound)	0	Lysogenic
SL346108_c_000000000086__full	16051	No	NA	22	11	0	Medium-quality	Genome-fragment	72.72	HMM-based (lower-bound)	0	Lysogenic
SL346109_c_000000000019__full	60165	No	NA	79	18	0	Complete	High-quality	100	DTR (medium-confidence)	0	Lysogenic
SL346109_c_000000000020__full	59346	No	NA	69	37	1	Medium-quality	Genome-fragment	79.54	HMM-based (lower-bound)	0
SL346109_c_000000000025__full	53341	No	NA	85	38	1	Complete	High-quality	100	DTR (medium-confidence)	0
SL346109_c_000000000030__full	45703	No	NA	67	21	0	Medium-quality	Genome-fragment	59.53	HMM-based (lower-bound)	0
SL346109_c_000000000034__full	41777	No	NA	61	17	2	Medium-quality	Genome-fragment	54.66	HMM-based (lower-bound)	0
SL346109_c_000000000036__full	40689	No	NA	67	25	1	Medium-quality	Genome-fragment	61.33	HMM-based (lower-bound)	0	Lysogenic
SL346109_c_000000000084__full	16051	No	NA	22	10	0	Medium-quality	Genome-fragment	72.72	HMM-based (lower-bound)	0	Lysogenic
SL346110_c_000000000001	232866	No	NA	217	1	161	High-quality	High-quality	100	HMM-based (lower-bound)	0
SL346110_c_000000000015	52651	No	NA	55	1	35	Medium-quality	Genome-fragment	78.76	HMM-based (lower-bound)	0
SL346110_c_000000000117__full	16051	No	NA	22	11	0	Medium-quality	Genome-fragment	72.72	HMM-based (lower-bound)	0	Lysogenic
SL346111_c_000000000002__full	30111	No	NA	32	20	1	Medium-quality	Genome-fragment	50.18	HMM-based (lower-bound)	0
SL346115_c_000000000017__full	37401	Yes	31840	53	22	2	Medium-quality	Genome-fragment	54.97	HMM-based (lower-bound)	14.87	Lysogenic
SL346115_c_000000000021__full	33331	No	NA	33	1	8	Medium-quality	Genome-fragment	53.46	HMM-based (lower-bound)	0
SL346115_c_000000000031__full	27226	No	NA	42	39	0	Medium-quality	Genome-fragment	85.31	HMM-based (lower-bound)	0
SL346115_c_000000000086__full	15911	No	NA	21	10	0	Medium-quality	Genome-fragment	72.08	HMM-based (lower-bound)	0	Lysogenic
SL346116_c_000000000004	7652	No	NA	1	1	0	Medium-quality	Genome-fragment	71.34	HMM-based (lower-bound)	0
SL346116_c_000000000008	5587	No	NA	3	2	0	Medium-quality	Genome-fragment	52.09	HMM-based (lower-bound)	0
SL346117_c_000000000025__full	5062	No	NA	5	1	0	High-quality	High-quality	100	HMM-based (lower-bound)	0	Lysogenic
SL346118_c_000000000008	37251	No	NA	39	1	22	Medium-quality	Genome-fragment	81.11	HMM-based (lower-bound)	0
SL346118_c_000000000012__full	33117	No	NA	34	12	0	Medium-quality	Genome-fragment	51.11	HMM-based (lower-bound)	0
SL346118_c_000000000943__full	2629	No	NA	5	1	0	Medium-quality	Genome-fragment	63.18	HMM-based (lower-bound)	0
SL346120_c_000000000001	365010	No	NA	329	1	228	High-quality	High-quality	100	HMM-based (lower-bound)	0
SL346120_c_000000000002	273793	No	NA	241	1	203	High-quality	High-quality	100	HMM-based (lower-bound)	0
SL346120_c_000000000017__full	46776	No	NA	66	21	0	Medium-quality	Genome-fragment	70.1	HMM-based (lower-bound)	0
SL346120_c_000000000026__full	40841	No	NA	68	25	1	Medium-quality	Genome-fragment	61.54	HMM-based (lower-bound)	0	Lysogenic
SL346120_c_000000000028__full	39648	Yes	34575	46	16	4	Medium-quality	Genome-fragment	52.19	HMM-based (lower-bound)	12.8	Lysogenic
SL346120_c_000000000215__full	16051	No	NA	22	11	0	Medium-quality	Genome-fragment	72.72	HMM-based (lower-bound)	0	Lysogenic
SL346122_c_000000000002	233302	No	NA	209	1	163	High-quality	High-quality	100	HMM-based (lower-bound)	0
SL346122_c_000000000024__full	40841	No	NA	68	26	1	Medium-quality	Genome-fragment	61.54	HMM-based (lower-bound)	0	Lysogenic
SL346122_c_000000000093__full	16051	No	NA	22	10	0	Medium-quality	Genome-fragment	72.72	HMM-based (lower-bound)	0	Lysogenic
SL346124_c_000000000001	251395	No	NA	231	1	157	High-quality	High-quality	100	HMM-based (lower-bound)	0
SL346124_c_000000000037__full	40841	No	NA	68	25	1	Medium-quality	Genome-fragment	61.54	HMM-based (lower-bound)	0	Lysogenic
SL346124_c_000000000122__full	24117	No	NA	37	12	0	Medium-quality	Genome-fragment	55.79	HMM-based (lower-bound)	0
SL346124_c_000000000246__full	16051	No	NA	22	10	0	Medium-quality	Genome-fragment	72.72	HMM-based (lower-bound)	0	Lysogenic
SL346125_c_000000000003	7958	No	NA	2	1	0	Medium-quality	Genome-fragment	74.19	HMM-based (lower-bound)	0
SL346128_c_000000000001	312833	No	NA	275	1	228	High-quality	High-quality	100	HMM-based (lower-bound)	0
SL346128_c_000000000025__full	45870	No	NA	73	26	1	Medium-quality	Genome-fragment	64.69	HMM-based (lower-bound)	0	Lysogenic
SL346128_c_000000000030__full	40841	No	NA	68	25	1	Medium-quality	Genome-fragment	61.54	HMM-based (lower-bound)	0	Lysogenic
SL346128_c_000000000172__full	16051	No	NA	22	11	0	Medium-quality	Genome-fragment	72.72	HMM-based (lower-bound)	0	Lysogenic
SL346129_c_000000000001	198049	No	NA	173	1	140	High-quality	High-quality	100	HMM-based (lower-bound)	0
SL346129_c_000000000028__full	40841	No	NA	68	25	1	Medium-quality	Genome-fragment	61.54	HMM-based (lower-bound)	0	Lysogenic
SL346129_c_000000000082__full	23840	No	NA	35	27	0	Medium-quality	Genome-fragment	70.35	HMM-based (lower-bound)	0
SL346129_c_000000000184__full	16051	No	NA	22	11	0	Medium-quality	Genome-fragment	72.72	HMM-based (lower-bound)	0	Lysogenic
SL346132_c_000000000003__full	8016	No	NA	8	6	0	Complete	High-quality	100	DTR (high-confidence)	0
SL346134_c_000000000009	8661	No	NA	2	1	0	Medium-quality	Genome-fragment	80.75	HMM-based (lower-bound)	0
SL346134_c_000000000010__full	8651	No	NA	4	1	0	Medium-quality	Genome-fragment	80.65	HMM-based (lower-bound)	0
SL346134_c_000000000027__full	7000	No	NA	8	2	0	High-quality	High-quality	91.69	HMM-based (lower-bound)	0
SL346137_c_000000000002	226102	No	NA	213	1	157	High-quality	High-quality	100	HMM-based (lower-bound)	0
SL346137_c_000000000026__full	40841	No	NA	68	26	1	Medium-quality	Genome-fragment	61.54	HMM-based (lower-bound)	0	Lysogenic
SL346137_c_000000000079__full	16051	No	NA	22	10	0	Medium-quality	Genome-fragment	72.72	HMM-based (lower-bound)	0	Lysogenic
SL346139_c_000000000001	324319	No	NA	291	2	238	High-quality	High-quality	100	HMM-based (lower-bound)	0
SL346139_c_000000000002__0_partial	65776	Yes	37958	89	26	15	Medium-quality	Genome-fragment	62.94	HMM-based (lower-bound)	42.29	Lysogenic
SL346139_c_000000000006	92922	No	NA	79	1	52	High-quality	High-quality	100	HMM-based (lower-bound)	0
SL346139_c_000000000181__full	16051	No	NA	22	11	0	Medium-quality	Genome-fragment	72.72	HMM-based (lower-bound)	0	Lysogenic
SL346141_c_000000000057	6321	No	NA	2	1	0	Medium-quality	Genome-fragment	58.93	HMM-based (lower-bound)	0
SL346144_c_000000000026__full	40691	No	NA	67	25	1	Medium-quality	Genome-fragment	61.34	HMM-based (lower-bound)	0	Lysogenic
SL346144_c_000000000051__full	28307	No	NA	42	39	0	Medium-quality	Genome-fragment	88.69	HMM-based (lower-bound)	0
SL346144_c_000000000056	26892	No	NA	29	1	16	Medium-quality	Genome-fragment	58.55	HMM-based (lower-bound)	0
SL346144_c_000000000113__full	16051	No	NA	22	10	0	Medium-quality	Genome-fragment	72.72	HMM-based (lower-bound)	0	Lysogenic
SL346145_c_000000000001__full	55803	No	NA	89	25	0	Medium-quality	Genome-fragment	73.65	HMM-based (lower-bound)	0
SL346150_c_000000000084__full	16051	No	NA	22	10	0	Medium-quality	Genome-fragment	72.72	HMM-based (lower-bound)	0	Lysogenic
SL346151_c_000000000004__full	65996	No	NA	88	33	0	Medium-quality	Genome-fragment	85.61	HMM-based (lower-bound)	0
SL346151_c_000000000007__full	59217	No	NA	69	37	1	Medium-quality	Genome-fragment	79.4	HMM-based (lower-bound)	0
SL346151_c_000000000010__full	49870	Yes	48754	60	21	4	Medium-quality	Genome-fragment	71.39	HMM-based (lower-bound)	2.24	Lysogenic
SL346151_c_000000000016__full	41777	No	NA	61	17	2	Medium-quality	Genome-fragment	54.66	HMM-based (lower-bound)	0
SL346151_c_000000000116__full	16051	No	NA	22	10	0	Medium-quality	Genome-fragment	72.72	HMM-based (lower-bound)	0	Lysogenic
SL346152_c_000000000001__full	41429	No	NA	69	17	0	Medium-quality	Genome-fragment	54.13	HMM-based (lower-bound)	0	Lysogenic
SL346154_c_000000000001	400252	No	NA	354	1	281	High-quality	High-quality	100	HMM-based (lower-bound)	0
SL346154_c_000000000018__full	46628	No	NA	66	21	0	Medium-quality	Genome-fragment	69.88	HMM-based (lower-bound)	0
SL346154_c_000000000023__full	40841	No	NA	68	26	1	Medium-quality	Genome-fragment	61.54	HMM-based (lower-bound)	0	Lysogenic
SL346154_c_000000000101__full	16051	No	NA	22	11	0	Medium-quality	Genome-fragment	72.72	HMM-based (lower-bound)	0	Lysogenic
SL346155_c_000000000002	228514	No	NA	216	1	157	High-quality	High-quality	100	HMM-based (lower-bound)	0
SL346155_c_000000000031__full	40841	No	NA	68	25	1	Medium-quality	Genome-fragment	61.54	HMM-based (lower-bound)	0	Lysogenic
SL346155_c_000000000065	29285	No	NA	30	1	17	Medium-quality	Genome-fragment	63.76	HMM-based (lower-bound)	0
SL346155_c_000000000165__full	16051	No	NA	21	10	0	Medium-quality	Genome-fragment	72.72	HMM-based (lower-bound)	0	Lysogenic
SL346156_c_000000000001	517723	No	NA	466	3	357	High-quality	High-quality	100	HMM-based (lower-bound)	0
SL346156_c_000000000002	368400	No	NA	333	1	230	High-quality	High-quality	100	HMM-based (lower-bound)	0
SL346156_c_000000000028__full	40841	No	NA	68	25	1	Medium-quality	Genome-fragment	61.54	HMM-based (lower-bound)	0	Lysogenic
SL346156_c_000000000036__full	37136	No	NA	55	26	0	Medium-quality	Genome-fragment	78.9	HMM-based (lower-bound)	0
SL346156_c_000000000265__full	16051	No	NA	21	10	0	Medium-quality	Genome-fragment	72.72	HMM-based (lower-bound)	0	Lysogenic
SL346157_c_000000000002	311724	No	NA	275	1	226	High-quality	High-quality	100	HMM-based (lower-bound)	0
SL346157_c_000000000026__full	40841	No	NA	68	25	1	Medium-quality	Genome-fragment	61.54	HMM-based (lower-bound)	0	Lysogenic
SL346157_c_000000000033	35681	No	NA	42	2	13	Medium-quality	Genome-fragment	59.16	HMM-based (lower-bound)	0	Lysogenic
SL346157_c_000000000037	34861	No	NA	34	1	7	Medium-quality	Genome-fragment	55.91	HMM-based (lower-bound)	0
SL346157_c_000000000048__full	29845	No	NA	46	21	0	Medium-quality	Genome-fragment	65.58	HMM-based (lower-bound)	0
SL346157_c_000000000177__full	16051	No	NA	22	11	0	Medium-quality	Genome-fragment	72.72	HMM-based (lower-bound)	0	Lysogenic
SL346159_c_000000000004__full	38715	No	NA	53	23	0	Medium-quality	Genome-fragment	57.42	HMM-based (lower-bound)	0
SL346160_c_000000000019__full	40841	No	NA	68	25	1	Medium-quality	Genome-fragment	61.54	HMM-based (lower-bound)	0	Lysogenic
SL346160_c_000000000026__full	34074	No	NA	53	21	0	Medium-quality	Genome-fragment	59.35	HMM-based (lower-bound)	0
SL346160_c_000000000111__full	16051	No	NA	21	10	0	Medium-quality	Genome-fragment	72.72	HMM-based (lower-bound)	0	Lysogenic
SL346161_c_000000000001__full	40841	No	NA	68	26	1	Medium-quality	Genome-fragment	61.54	HMM-based (lower-bound)	0	Lysogenic
SL346161_c_000000000011__full	15920	No	NA	21	10	0	Medium-quality	Genome-fragment	72.12	HMM-based (lower-bound)	0	Lysogenic
SL346162_c_000000000001	368755	No	NA	332	1	230	High-quality	High-quality	100	HMM-based (lower-bound)	0
SL346162_c_000000000003	278235	No	NA	253	1	190	High-quality	High-quality	100	HMM-based (lower-bound)	0
SL346162_c_000000000028__full	40689	No	NA	67	25	1	Medium-quality	Genome-fragment	61.33	HMM-based (lower-bound)	0	Lysogenic
SL346162_c_000000000132__full	16051	No	NA	22	10	0	Medium-quality	Genome-fragment	72.72	HMM-based (lower-bound)	0	Lysogenic
SL346163_c_000000000007__full	25386	No	NA	37	34	0	Medium-quality	Genome-fragment	78.67	HMM-based (lower-bound)	0
SL346163_c_000000000514__full	2955	No	NA	3	1	0	Medium-quality	Genome-fragment	71.01	HMM-based (lower-bound)	0
SL346164_c_000000000002	191309	No	NA	180	3	117	High-quality	High-quality	93.36	HMM-based (lower-bound)	0	Lysogenic
SL346164_c_000000000019__full	40696	No	NA	67	25	1	Medium-quality	Genome-fragment	61.34	HMM-based (lower-bound)	0	Lysogenic
SL346164_c_000000000037__full	16051	No	NA	22	10	0	Medium-quality	Genome-fragment	72.72	HMM-based (lower-bound)	0	Lysogenic
SL346167_c_000000000001	234452	No	NA	209	2	171	High-quality	High-quality	100	HMM-based (lower-bound)	0
SL346167_c_000000000002__0_partial	78318	Yes	38591	91	25	28	Medium-quality	Genome-fragment	64.57	HMM-based (lower-bound)	50.73	Lysogenic
SL346167_c_000000000028__full	40841	No	NA	68	25	1	Medium-quality	Genome-fragment	61.54	HMM-based (lower-bound)	0	Lysogenic
SL346167_c_000000000111__full	19021	No	NA	27	21	0	Medium-quality	Genome-fragment	56.39	HMM-based (lower-bound)	0
SL346167_c_000000000139__full	16051	No	NA	22	10	0	Medium-quality	Genome-fragment	72.72	HMM-based (lower-bound)	0	Lysogenic
SL346167_c_000000001023__full	3851	No	NA	3	1	0	High-quality	High-quality	92.54	HMM-based (lower-bound)	0
SL346168_c_000000000001	372048	No	NA	331	1	262	High-quality	High-quality	100	HMM-based (lower-bound)	0
SL346168_c_000000000002	346736	No	NA	322	1	237	High-quality	High-quality	100	HMM-based (lower-bound)	0
SL346168_c_000000000003	236475	No	NA	221	3	148	High-quality	High-quality	93.66	HMM-based (lower-bound)	0	Lysogenic
SL346168_c_000000000025__full	40841	No	NA	68	25	1	Medium-quality	Genome-fragment	61.54	HMM-based (lower-bound)	0	Lysogenic
SL346168_c_000000000161__full	16051	No	NA	22	10	0	Medium-quality	Genome-fragment	72.72	HMM-based (lower-bound)	0	Lysogenic
SL346173_c_000000000003__full	16051	No	NA	22	10	0	Medium-quality	Genome-fragment	72.72	HMM-based (lower-bound)	0	Lysogenic

## Sheet: S3
Table S3. Alpha diversity of viral operational taxonomic units (vOTUs) across habitats in the built environments.
Richness1
	Bollard	Floor	Handrail (pier)	Pole	Handrail (park)	Handrail (subwayexit)	Doorknob	Headboard	Skin	Ticket kiosk	Air
Bollard
Floor	0.801666
Handrail (pier)	0.0148291	0.0185436
Pole	0.00210094	0.00454656	0.617353
Handrail (park)	0.002	0.00294073	0.695263	0.911393
Handrail (subwayexit)	< 0.001	0.00117597	0.17399	0.371155	0.260046
Doorknob	< 0.001	0.000604191	< 0.001	< 0.001	< 0.001	< 0.001
Headboard	0.00529176	0.0721784	< 0.001	< 0.001	< 0.001	< 0.001	0.00397552
Skin	< 0.001	< 0.001	< 0.001	< 0.001	< 0.001	< 0.001	0.0351535	< 0.001
Ticket kiosk	< 0.001	0.00120446	0.0323116	0.0716458	0.0251659	0.271224	< 0.001	< 0.001	< 0.001
Air	< 0.001	< 0.001	0.311954	0.792201	0.512384	0.496873	< 0.001	< 0.001	< 0.001	0.0463081
Shannon's H1
	Bollard	Floor	Handrail (pier)	Pole	Handrail (park)	Handrail (subwayexit)	Doorknob	Headboard	Skin	Ticket kiosk	Air
Bollard
Floor	0.900478
Handrail (pier)	0.000785831	0.0377649
Pole	0.00122035	0.0205331	0.937985
Handrail (park)	< 0.001	0.0216122	0.607066	0.958918
Handrail (subwayexit)	< 0.001	0.006671	0.153968	0.319311	0.198561
Doorknob	< 0.001	0.000605167	< 0.001	< 0.001	< 0.001	< 0.001
Headboard	0.00242351	0.0227738	< 0.001	< 0.001	< 0.001	< 0.001	0.0768807
Skin	< 0.001	< 0.001	< 0.001	< 0.001	< 0.001	< 0.001	0.081177	< 0.001
Ticket kiosk	< 0.001	0.0129375	0.0204696	0.0841768	0.0147243	0.302984	< 0.001	< 0.001	< 0.001
Air	< 0.001	0.00126748	0.297274	0.610456	0.491455	0.462426	< 0.001	< 0.001	< 0.001	0.0909701
Pielou's evenness1
	Bollard	Floor	Handrail (pier)	Pole	Handrail (park)	Handrail (subwayexit)	Doorknob	Headboard	Skin	Ticket kiosk	Air
Bollard
Floor	0.0326103
Handrail (pier)	0.297385	0.686757
Pole	0.393522	0.239718	0.596765
Handrail (park)	0.202903	0.520099	0.913784	0.562251
Handrail (subwayexit)	0.602347	0.298945	0.973855	0.925615	0.626117
Doorknob	0.0429263	0.496208	0.923623	0.443517	0.751335	0.337704
Headboard	0.86347	0.00131039	0.333331	0.260837	0.14052	0.625499	0.00131207
Skin	0.0408189	0.359314	0.882992	0.485163	0.957131	0.389366	0.799951	0
Ticket kiosk	0.813808	0.0891881	0.42606	0.54998	0.321744	0.482485	0.115325	0.48899	0.114114
Air	0.0255675	0.717329	0.863071	0.288284	0.692872	0.360285	0.684485	0.00106542	0.454383	0.109896
1Statistically significant p estimated using the Mann–Whitney U test are shown in bold.

## Sheet: S4
Table S4. Taxonomy of vOTUs across habitats in the built environments.
Autographiviridae1
	Bollard	Floor	Handrail (pier)	Pole	Handrail (park)	Handrail (subway exit)	Doorknob	Headboard	Skin	Ticket kiosk	Air
Bollard
Floor
Handrail (pier)
Pole
Handrail (park)
Handrail (subway exit)
Doorknob
Headboard	0.2932	0.2666	0.5421	0.3171	0.2475	0.2786	0.2415
Skin								0.0305
Ticket kiosk								0.2997
Air								0.0799
Genomoviridae1
	Bollard	Floor	Handrail (pier)	Pole	Handrail (park)	Handrail (subway exit)	Doorknob	Headboard	Skin	Ticket kiosk	Air
Bollard
Floor	0.4556
Handrail (pier)	0.7538	0.3915
Pole	1		0.4676
Handrail (park)	0.4191		0.358
Handrail (subway exit)	1	0.2289	1	0.5033	0.2026
Doorknob	0.363		0.3201			0.1578
Headboard	0.3728		0.3078			0.1616
Skin	0.2238	1	0.1818	1	1	0.1038	1	1
Ticket kiosk	1		0.4395			0.4986			1
Air	0.5279	0.2915	1	0.3235	0.1514	0.761	0.1279	0.1267	0.0204	0.3175
Inoviridae1
	Bollard	Floor	Handrail (pier)	Pole	Handrail (park)	Handrail (subway exit)	Doorknob	Headboard	Skin	Ticket kiosk	Air
Bollard
Floor
Handrail (pier)	0.434	0.3915
Pole	0.4688	0.4265	0.7486
Handrail (park)			0.358	0.3866
Handrail (subway exit)	1	0.4808	0.7594	0.7523	0.4535
Doorknob			0.3201	0.3435		0.409
Headboard			0.3078	0.3441		0.4059
Skin	0.1224	0.073	0.6875	0.4134	0.0682	0.1829	0.0332	0.0308
Ticket kiosk	0.4976	0.4452	0.7521	1	0.4125	0.7517	0.3674	0.3579	0.4475
Air			0.2622	0.2989		0.3518			0.0163	0.3076
Metaviridae1
	Bollard	Floor	Handrail (pier)	Pole	Handrail (park)	Handrail (subway exit)	Doorknob	Headboard	Skin	Ticket kiosk	Air
Bollard
Floor
Handrail (pier)
Pole	0.2147	0.1709	0.4937
Handrail (park)	0.0009	0.0002	0.0033	0.0383
Handrail (subway exit)				0.1828	0.0004
Doorknob				0.116	0
Headboard	0.0458	0.0187	0.0828	0.4904	0.0296	0.0221	0.0056
Skin				0.0404	0			0
Ticket kiosk				0.2228	0.0014			0.0454
Air				0.0882	0			0.0014
MGVL631
	Bollard	Floor	Handrail (pier)	Pole	Handrail (park)	Handrail (subway exit)	Doorknob	Headboard	Skin	Ticket kiosk	Air
Bollard
Floor
Handrail (pier)	0.0328	0.0233
Pole			0.0449
Handrail (park)			0.0161
Handrail (subway exit)			0.0235
Doorknob			0.008
Headboard			0.0077
Skin			0.0007
Ticket kiosk			0.0363
Air			0.0033
Microviridae1
	Bollard	Floor	Handrail (pier)	Pole	Handrail (park)	Handrail (subway exit)	Doorknob	Headboard	Skin	Ticket kiosk	Air
Bollard
Floor
Handrail (pier)
Pole
Handrail (park)
Handrail (subway exit)	1	0.4808	1	1	0.4535
Doorknob						0.409
Headboard						0.4059
Skin						0.2469
Ticket kiosk						1
Air						0.3518
Mimiviridae1
	Bollard	Floor	Handrail (pier)	Pole	Handrail (park)	Handrail (subway exit)	Doorknob	Headboard	Skin	Ticket kiosk	Air
Bollard
Floor
Handrail (pier)
Pole	0.0087	0.0037	0.0266
Handrail (park)	0.2739	0.2436	0.3101	0.0787
Handrail (subway exit)				0.0046	0.2446
Doorknob				0.0008	0.0887
Headboard	1	1	1	0.0018	0.1686	1	1
Skin				0	0.0191			0.3207
Ticket kiosk				0.009	0.2693			1
Air				0.0004	0.0569			0.4424
Myoviridae1
	Bollard	Floor	Handrail (pier)	Pole	Handrail (park)	Handrail (subway exit)	Doorknob	Headboard	Skin	Ticket kiosk	Air
Bollard
Floor	0.1509
Handrail (pier)	0.1269	1
Pole	0.1196	1
Handrail (park)	0.03	0.4695
Handrail (subway exit)	0.0421	1
Doorknob	0.1629	0.8501	0.5614	0.5355	0.5036	0.5062
Headboard	0.0173	0.4175					0.2407
Skin	0.0706	0.8181	0.5804	0.5333	0.3262	0.3317	0.9367	0.1746
Ticket kiosk	0.3572	0.7496	1	1	0.4125	0.458	1	0.3579	1
Air	0.0101	0.3655					0.1921		0.1665	0.3076
Papillomaviridae1
	Bollard	Floor	Handrail (pier)	Pole	Handrail (park)	Handrail (subway exit)	Doorknob	Headboard	Skin	Ticket kiosk	Air
Bollard
Floor
Handrail (pier)
Pole
Handrail (park)
Handrail (subway exit)	0.4951	0.2289	0.5148	0.5033	0.2026
Doorknob						0.1578
Headboard	0.5285	0.5065	0.5661	0.5359	0.495	0.7097	0.4954
Skin	0.2287	0.1902	0.3454	0.3491	0.1993	0.9682	0.1007	0.5386
Ticket kiosk						0.4986		0.5349	0.3112
Air	0.3087	0.2915	0.3475	0.3235	0.1514	0.802	0.1279	0.4229	0.9968	0.3175
Podoviridae1
	Bollard	Floor	Handrail (pier)	Pole	Handrail (park)	Handrail (subway exit)	Doorknob	Headboard	Skin	Ticket kiosk	Air
Bollard
Floor
Handrail (pier)
Pole
Handrail (park)	1	1	1	1
Handrail (subway exit)					1
Doorknob					0.4439
Headboard					0.4425
Skin					0.273
Ticket kiosk	0.4976	0.4452	1	1	0.7545	0.458	0.3674	0.3579	0.2122
Air	1	1	1	1	0.7508	1	1	1	0.3735	0.7917
Retroviridae1
	Bollard	Floor	Handrail (pier)	Pole	Handrail (park)	Handrail (subway exit)	Doorknob	Headboard	Skin	Ticket kiosk	Air
Bollard
Floor
Handrail (pier)
Pole
Handrail (park)	1	1	1	1
Handrail (subway exit)					1
Doorknob					0.4439
Headboard					0.4425
Skin					0.273
Ticket kiosk					1
Air					0.3923
Siphoviridae1
	Bollard	Floor	Handrail (pier)	Pole	Handrail (park)	Handrail (subway exit)	Doorknob	Headboard	Skin	Ticket kiosk	Air
Bollard
Floor	0.2355
Handrail (pier)	0.0341	0.0001
Pole	0.0013	0	0.1942
Handrail (park)	0.2596	0.8765	0.0001	0
Handrail (subway exit)	0.071	0.0005	0.503	0.0449	0.0006
Doorknob	0	0	0.0006	0.0395	0	0
Headboard	0.0004	0	0.2111	0.7349	0	0.0233	0.0028
Skin	0	0	0	0.007	0	0	0.6272	0
Ticket kiosk	0.6076	0.55	0.0055	0	0.5764	0.0145	0	0	0
Air	0.0018	0.1428	0	0	0.0859	0	0	0	0	0.0401
Unclassified Caudovirales1
	Bollard	Floor	Handrail (pier)	Pole	Handrail (park)	Handrail (subway exit)	Doorknob	Headboard	Skin	Ticket kiosk	Air
Bollard
Floor	0.6852
Handrail (pier)	0	0
Pole	0	0	0.1409
Handrail (park)	0	0	0.2083	0.8011
Handrail (subway exit)	0	0	0.1445	0.929	0.8351
Doorknob	0.0478	0.2981	0	0	0	0
Headboard	0.0764	0.0192	0.0028	0	0	0	0
Skin	0.0014	0.0159	0	0	0	0	0.1681	0
Ticket kiosk	0.0168	0.0023	0.0936	0.0037	0.0016	0.0013	0	0.2506	0
Air	0	0	0	0.0588	0.005	0.0185	0	0	0	0
Unclassified Chitovirales1
	Bollard	Floor	Handrail (pier)	Pole	Handrail (park)	Handrail (subway exit)	Doorknob	Headboard	Skin	Ticket kiosk	Air
Bollard
Floor
Handrail (pier)
Pole
Handrail (park)	0.1388	0.1179	0.2958	0.1576
Handrail (subway exit)					0.1235
Doorknob					0.0426
Headboard					0.0315
Skin					0.006
Ticket kiosk					0.1455
Air					0.021
Unclassified Cirlivirales1
	Bollard	Floor	Handrail (pier)	Pole	Handrail (park)	Handrail (subway exit)	Doorknob	Headboard	Skin	Ticket kiosk	Air
Bollard
Floor
Handrail (pier)
Pole
Handrail (park)
Handrail (subway exit)
Doorknob
Headboard	1	1	1	1	1	1	1
Skin								0.3207
Ticket kiosk	0.4976	0.4452	1	1	0.4125	0.458	0.3674	0.7715	0.2122
Air	1	1	1	1	1	1	1	0.7498	0.3735	0.7917
Unclassified Lefavirales1
	Bollard	Floor	Handrail (pier)	Pole	Handrail (park)	Handrail (subway exit)	Doorknob	Headboard	Skin	Ticket kiosk	Air
Bollard
Floor	1
Handrail (pier)		1
Pole		1
Handrail (park)		0.4695
Handrail (subway exit)		1
Doorknob		0.4177
Headboard		0.4175
Skin		0.2543
Ticket kiosk		1
Air		0.3655
Unclassified Ortervirales1
	Bollard	Floor	Handrail (pier)	Pole	Handrail (park)	Handrail (subway exit)	Doorknob	Headboard	Skin	Ticket kiosk	Air
Bollard
Floor	0.561
Handrail (pier)	0.1364	0.0356
Pole	0.7611	0.3833	0.3311
Handrail (park)
Handrail (subway exit)	0.1768	0.3409	0.0009	0.0605
Doorknob	0.0014	0.0041	0	0.0016		0.0406
Headboard	0.047	0.0031	0.8714	0.1491		0	0
Skin	0	0.0019	0	0		0.0136	0.5605	0
Ticket kiosk	0.0272	0.0289	0.0002	0.0095		0.1965	NA	0.0001	1
Air	0	0	0.0455	0.0007		0	0	0.0151	0	0
Unclassified Piccovirales1
	Bollard	Floor	Handrail (pier)	Pole	Handrail (park)	Handrail (subway exit)	Doorknob	Headboard	Skin	Ticket kiosk	Air
Bollard
Floor
Handrail (pier)
Pole
Handrail (park)	0.0701	0.0537	0.1518	0.1569
Handrail (subway exit)					0.063
Doorknob					0.0187
Headboard					0.0128
Skin					0.0022
Ticket kiosk					0.0741
Air					0.0067
Unclassified Pimascovirales1
	Bollard	Floor	Handrail (pier)	Pole	Handrail (park)	Handrail (subway exit)	Doorknob	Headboard	Skin	Ticket kiosk	Air
Bollard
Floor
Handrail (pier)
Pole
Handrail (park)	1	1	1	1
Handrail (subway exit)					1
Doorknob					0.4439
Headboard					0.4425
Skin					0.273
Ticket kiosk					1
Air					0.3923
1Statistically significant p estimated using the Mann–Whitney U test with Monte Carlo simulation (two-tailed, n = 10,000) are shown in bold.

## Sheet: S5
Table S5. Information of the 860 representative metagenome-assembled genomes.
rMAG	Completeness	Contamination	GC	Genome size	# contigs	N50 (contigs)	Domain	Phylum	Class	Order	Family	Genus	Species	fastani_reference	fastani_reference_radius	fastani_taxonomy	fastani_ani	fastani_af	closest_placement_reference	closest_placement_radius	closest_placement_taxonomy	closest_placement_ani	closest_placement_af	pplacer_taxonomy	classification_method	note	other_related_references(genome_id,species_name,radius,ANI,AF)	msa_percent	translation_table	red_value	warnings	Sample	Built_environments	Location	Latitude	Longitude	Ground_level	Type	Habitat	Surface_material	Air_temperature	Air_humidity	Sampling_date	Sampling_date2	Indoor_outdoor	Input station line	Select sampling place	Sampling place specific details	Select_location
SL310935_bin.1	63.8001	0.802752	0.73684	1455797	774	1950	d__Bacteria	Actinobacteriota	Actinomycetia	o__Actinomycetales	f__Micrococcaceae	g__Micrococcus	s__Micrococcus luteus	GCF_000023205.1	95	d__Bacteria;p__Actinobacteriota;c__Actinomycetia;o__Actinomycetales;f__Micrococcaceae;g__Micrococcus;s__Micrococcus luteus	97.37	1	GCF_000023205.1	95	d__Bacteria;p__Actinobacteriota;c__Actinomycetia;o__Actinomycetales;f__Micrococcaceae;g__Micrococcus;s__Micrococcus luteus	97.37	1	d__Bacteria;p__Actinobacteriota;c__Actinomycetia;o__Actinomycetales;f__Micrococcaceae;g__Micrococcus;s__	taxonomic classification defined by topology and ANI	topological placement and ANI have congruent species assignments	GCF_014205115.1, s__Micrococcus endophyticus, 95.0, 89.96, 0.98; GCF_014204815.1, s__Micrococcus flavus, 95.0, 84.16, 0.97; GCF_001570885.1, s__Micrococcus lylae, 95.0, 82.53, 0.92; GCF_014205175.1, s__Micrococcus cohnii, 95.0, 80.7, 0.79	53.92	11	N/A	N/A	SL310935	Subway	Kowloon Tong	22.3372	114.176	Aboveground	Subway air	Air	Air	NA	NA	NA	04/07 2017	Outdoor	NA	NA	NA	NA
SL310936_bin.1	89.6576	4.45846	0.737804	2052165	555	4481	d__Bacteria	Actinobacteriota	Actinomycetia	o__Actinomycetales	f__Micrococcaceae	g__Micrococcus	s__Micrococcus luteus	GCF_000023205.1	95	d__Bacteria;p__Actinobacteriota;c__Actinomycetia;o__Actinomycetales;f__Micrococcaceae;g__Micrococcus;s__Micrococcus luteus	97.22	0.95	GCF_000023205.1	95	d__Bacteria;p__Actinobacteriota;c__Actinomycetia;o__Actinomycetales;f__Micrococcaceae;g__Micrococcus;s__Micrococcus luteus	97.22	0.95	d__Bacteria;p__Actinobacteriota;c__Actinomycetia;o__Actinomycetales;f__Micrococcaceae;g__Micrococcus;s__	taxonomic classification defined by topology and ANI	topological placement and ANI have congruent species assignments	GCF_014205115.1, s__Micrococcus endophyticus, 95.0, 89.39, 0.94; GCF_014204815.1, s__Micrococcus flavus, 95.0, 84.68, 0.88; GCF_001570885.1, s__Micrococcus lylae, 95.0, 83.11, 0.79; GCF_014205175.1, s__Micrococcus cohnii, 95.0, 81.35, 0.67	86.06	11	N/A	N/A	SL310936	Subway	Tai Wai	22.373	114.179	Aboveground	Subway air	Air	Air	NA	NA	NA	04/07 2017	Outdoor	NA	NA	NA	NA
SL310937_bin.2	60.4425	5.9613	0.731231	1607477	952	1667	d__Bacteria	Actinobacteriota	Actinomycetia	o__Actinomycetales	f__Micrococcaceae	g__Micrococcus	s__Micrococcus luteus	GCF_000023205.1	95	d__Bacteria;p__Actinobacteriota;c__Actinomycetia;o__Actinomycetales;f__Micrococcaceae;g__Micrococcus;s__Micrococcus luteus	97.68	1	GCF_000023205.1	95	d__Bacteria;p__Actinobacteriota;c__Actinomycetia;o__Actinomycetales;f__Micrococcaceae;g__Micrococcus;s__Micrococcus luteus	97.68	1	d__Bacteria;p__Actinobacteriota;c__Actinomycetia;o__Actinomycetales;f__Micrococcaceae;g__Micrococcus;s__	taxonomic classification defined by topology and ANI	topological placement and ANI have congruent species assignments	GCF_014205115.1, s__Micrococcus endophyticus, 95.0, 88.93, 1.0; GCF_014204815.1, s__Micrococcus flavus, 95.0, 84.07, 0.96; GCF_001570885.1, s__Micrococcus lylae, 95.0, 83.42, 0.83; GCF_014205175.1, s__Micrococcus cohnii, 95.0, 80.89, 0.8	40.82	11	N/A	N/A	SL310937	Subway	Che Kung Temple	22.3748	114.186	Aboveground	Subway air	Air	Air	NA	NA	NA	04/07 2017	Outdoor	NA	NA	NA	NA
SL310939_bin.3	68.3429	2.55428	0.442181	1593192	920	1740	d__Bacteria	Proteobacteria	Gammaproteobacteria	o__Pseudomonadales	f__Moraxellaceae	g__Moraxella_A	s__Moraxella_A cinereus	GCA_014647715.1	95	d__Bacteria;p__Proteobacteria;c__Gammaproteobacteria;o__Pseudomonadales;f__Moraxellaceae;g__Moraxella_A;s__Moraxella_A cinereus	97.07	0.99	GCA_014647715.1	95	d__Bacteria;p__Proteobacteria;c__Gammaproteobacteria;o__Pseudomonadales;f__Moraxellaceae;g__Moraxella_A;s__Moraxella_A cinereus	97.07	0.99	d__Bacteria;p__Proteobacteria;c__Gammaproteobacteria;o__Pseudomonadales;f__Moraxellaceae;g__Moraxella_A;s__	taxonomic classification defined by topology and ANI	topological placement and ANI have congruent species assignments	GCF_001553955.1, s__Moraxella_A osloensis, 95.0237, 96.25, 0.96; GCF_009867135.1, s__Moraxella_A sp002478835, 95.0237, 96.14, 0.92; GCF_001591265.1, s__Moraxella_A atlantae, 95.0, 80.12, 0.32; GCF_000379845.1, s__Moraxella_A boevrei, 95.0, 79.9, 0.3; GCF_000320365.1, s__Moraxella_A macacae, 95.0, 79.8, 0.21	62.87	11	N/A	N/A	SL310939	Subway	Shek Kip Mei	22.332	114.169	Underground	Subway air	Air	Air	NA	NA	NA	04/07 2017	Indoor	NA	NA	NA	NA
SL310939_bin.4	87.6112	3.12382	0.736937	2272270	633	4122	d__Bacteria	Actinobacteriota	Actinomycetia	o__Actinomycetales	f__Micrococcaceae	g__Micrococcus	s__Micrococcus luteus	GCF_000023205.1	95	d__Bacteria;p__Actinobacteriota;c__Actinomycetia;o__Actinomycetales;f__Micrococcaceae;g__Micrococcus;s__Micrococcus luteus	97.41	0.91	GCF_000023205.1	95	d__Bacteria;p__Actinobacteriota;c__Actinomycetia;o__Actinomycetales;f__Micrococcaceae;g__Micrococcus;s__Micrococcus luteus	97.41	0.91	d__Bacteria;p__Actinobacteriota;c__Actinomycetia;o__Actinomycetales;f__Micrococcaceae;g__Micrococcus;s__	taxonomic classification defined by topology and ANI	topological placement and ANI have congruent species assignments	GCF_014205115.1, s__Micrococcus endophyticus, 95.0, 89.09, 0.89; GCF_014204815.1, s__Micrococcus flavus, 95.0, 84.98, 0.84; GCF_001570885.1, s__Micrococcus lylae, 95.0, 83.26, 0.78; GCF_014205175.1, s__Micrococcus cohnii, 95.0, 81.47, 0.66	82.91	11	N/A	N/A	SL310939	Subway	Shek Kip Mei	22.332	114.169	Underground	Subway air	Air	Air	NA	NA	NA	04/07 2017	Indoor	NA	NA	NA	NA
SL310940_bin.1	83.7547	3.69648	0.737728	1932411	588	3725	d__Bacteria	Actinobacteriota	Actinomycetia	o__Actinomycetales	f__Micrococcaceae	g__Micrococcus	s__Micrococcus luteus	GCF_000023205.1	95	d__Bacteria;p__Actinobacteriota;c__Actinomycetia;o__Actinomycetales;f__Micrococcaceae;g__Micrococcus;s__Micrococcus luteus	97.46	0.97	GCF_000023205.1	95	d__Bacteria;p__Actinobacteriota;c__Actinomycetia;o__Actinomycetales;f__Micrococcaceae;g__Micrococcus;s__Micrococcus luteus	97.46	0.97	d__Bacteria;p__Actinobacteriota;c__Actinomycetia;o__Actinomycetales;f__Micrococcaceae;g__Micrococcus;s__	taxonomic classification defined by topology and ANI	topological placement and ANI have congruent species assignments	GCF_014205115.1, s__Micrococcus endophyticus, 95.0, 89.16, 0.95; GCF_014204815.1, s__Micrococcus flavus, 95.0, 84.17, 0.9; GCF_001570885.1, s__Micrococcus lylae, 95.0, 82.82, 0.8; GCF_014205175.1, s__Micrococcus cohnii, 95.0, 80.84, 0.7	80.03	11	N/A	N/A	SL310940	Subway	Prince Edward	22.3251	114.168	Underground	Subway air	Air	Air	NA	NA	NA	04/07 2017	Indoor	NA	NA	NA	NA
SL310940_bin.2	67.8799	3.18487	0.440762	1605682	966	1670	d__Bacteria	Proteobacteria	Gammaproteobacteria	o__Pseudomonadales	f__Moraxellaceae	g__Moraxella_A	s__Moraxella_A cinereus	GCA_014647715.1	95	d__Bacteria;p__Proteobacteria;c__Gammaproteobacteria;o__Pseudomonadales;f__Moraxellaceae;g__Moraxella_A;s__Moraxella_A cinereus	96.34	0.96	N/A	N/A	N/A	N/A	N/A	d__Bacteria;p__Proteobacteria;c__Gammaproteobacteria;o__Pseudomonadales;f__Moraxellaceae;g__Moraxella_A;s__	ANI	topological placement and ANI have incongruent species assignments	GCA_014647715.1, s__Moraxella_A cinereus, 95.0, 96.34, 0.96; GCF_009867135.1, s__Moraxella_A sp002478835, 95.0237, 96.03, 0.94; GCF_001553955.1, s__Moraxella_A osloensis, 95.0237, 94.94, 0.98; GCF_000379845.1, s__Moraxella_A boevrei, 95.0, 80.23, 0.31; GCF_000320365.1, s__Moraxella_A macacae, 95.0, 79.46, 0.21; GCF_001591265.1, s__Moraxella_A atlantae, 95.0, 78.64, 0.33	58.78	11	N/A	N/A	SL310940	Subway	Prince Edward	22.3251	114.168	Underground	Subway air	Air	Air	NA	NA	NA	04/07 2017	Indoor	NA	NA	NA	NA
SL310941_bin.1	81.6571	6.50942	0.441633	2247434	1198	1949	d__Bacteria	Proteobacteria	Gammaproteobacteria	o__Pseudomonadales	f__Moraxellaceae	g__Moraxella_A	s__Moraxella_A cinereus	GCA_014647715.1	95	d__Bacteria;p__Proteobacteria;c__Gammaproteobacteria;o__Pseudomonadales;f__Moraxellaceae;g__Moraxella_A;s__Moraxella_A cinereus	96.72	0.96	N/A	N/A	N/A	N/A	N/A	d__Bacteria;p__Proteobacteria;c__Gammaproteobacteria;o__Pseudomonadales;f__Moraxellaceae;g__Moraxella_A;s__	ANI	topological placement and ANI have incongruent species assignments	GCA_014647715.1, s__Moraxella_A cinereus, 95.0, 96.72, 0.96; GCF_001553955.1, s__Moraxella_A osloensis, 95.0237, 95.61, 0.92; GCF_009867135.1, s__Moraxella_A sp002478835, 95.0237, 95.2, 0.87; GCF_001591265.1, s__Moraxella_A atlantae, 95.0, 80.4, 0.32; GCF_000320365.1, s__Moraxella_A macacae, 95.0, 79.91, 0.15; GCF_000379845.1, s__Moraxella_A boevrei, 95.0, 78.38, 0.25	72.23	11	N/A	N/A	SL310941	Subway	Sham Shui Po	22.3313	114.162	Underground	Subway air	Air	Air	NA	NA	NA	04/07 2017	Indoor	NA	NA	NA	NA
SL310941_bin.3	91.1894	3.16259	0.736352	2219019	570	4719	d__Bacteria	Actinobacteriota	Actinomycetia	o__Actinomycetales	f__Micrococcaceae	g__Micrococcus	s__Micrococcus luteus	GCF_000023205.1	95	d__Bacteria;p__Actinobacteriota;c__Actinomycetia;o__Actinomycetales;f__Micrococcaceae;g__Micrococcus;s__Micrococcus luteus	97.42	0.92	GCF_000023205.1	95	d__Bacteria;p__Actinobacteriota;c__Actinomycetia;o__Actinomycetales;f__Micrococcaceae;g__Micrococcus;s__Micrococcus luteus	97.42	0.92	d__Bacteria;p__Actinobacteriota;c__Actinomycetia;o__Actinomycetales;f__Micrococcaceae;g__Micrococcus;s__	taxonomic classification defined by topology and ANI	topological placement and ANI have congruent species assignments	GCF_014205115.1, s__Micrococcus endophyticus, 95.0, 89.43, 0.9; GCF_014204815.1, s__Micrococcus flavus, 95.0, 84.79, 0.87; GCF_001570885.1, s__Micrococcus lylae, 95.0, 83.03, 0.79; GCF_014205175.1, s__Micrococcus cohnii, 95.0, 81.32, 0.65	86.92	11	N/A	N/A	SL310941	Subway	Sham Shui Po	22.3313	114.162	Underground	Subway air	Air	Air	NA	NA	NA	04/07 2017	Indoor	NA	NA	NA	NA
SL310941_bin.4	50.3231	1.50794	0.696108	1520970	393	4529	d__Bacteria	Proteobacteria	Alphaproteobacteria	o__Rhodobacterales	f__Rhodobacteraceae	g__Paracoccus	s__Paracoccus salipaludis	GCF_002287065.1	95	d__Bacteria;p__Proteobacteria;c__Alphaproteobacteria;o__Rhodobacterales;f__Rhodobacteraceae;g__Paracoccus;s__Paracoccus salipaludis	98.9	0.96	GCF_002287065.1	95	d__Bacteria;p__Proteobacteria;c__Alphaproteobacteria;o__Rhodobacterales;f__Rhodobacteraceae;g__Paracoccus;s__Paracoccus salipaludis	98.9	0.96	d__Bacteria;p__Proteobacteria;c__Alphaproteobacteria;o__Rhodobacterales;f__Rhodobacteraceae;g__Paracoccus;s__	taxonomic classification defined by topology and ANI	topological placement and ANI have congruent species assignments	GCF_900102885.1, s__Paracoccus chinensis, 95.0, 91.59, 0.9; GCF_014164625.1, s__Paracoccus sp014164625, 95.0, 87.35, 0.83; GCF_900142875.1, s__Paracoccus solventivorans, 95.0, 83.53, 0.77; GCF_900106665.1, s__Paracoccus sanguinis, 95.0, 83.4, 0.76; GCF_000763805.1, s__Paracoccus sphaerophysae, 95.0, 83.35, 0.77; GCF_003286075.1, s__Paracoccus endophyticus, 95.0, 82.78, 0.78; GCF_004522155.1, s__P…	40.6	11	N/A	N/A	SL310941	Subway	Sham Shui Po	22.3313	114.162	Underground	Subway air	Air	Air	NA	NA	NA	04/07 2017	Indoor	NA	NA	NA	NA
SL310942_bin.1	93.5512	4.70566	0.740833	2239022	745	3890	d__Bacteria	Actinobacteriota	Actinomycetia	o__Actinomycetales	f__Micrococcaceae	g__Micrococcus	s__Micrococcus luteus	GCF_000023205.1	95	d__Bacteria;p__Actinobacteriota;c__Actinomycetia;o__Actinomycetales;f__Micrococcaceae;g__Micrococcus;s__Micrococcus luteus	97.33	0.97	GCF_000023205.1	95	d__Bacteria;p__Actinobacteriota;c__Actinomycetia;o__Actinomycetales;f__Micrococcaceae;g__Micrococcus;s__Micrococcus luteus	97.33	0.97	d__Bacteria;p__Actinobacteriota;c__Actinomycetia;o__Actinomycetales;f__Micrococcaceae;g__Micrococcus;s__	taxonomic classification defined by topology and ANI	topological placement and ANI have congruent species assignments	GCF_014205115.1, s__Micrococcus endophyticus, 95.0, 89.05, 0.96; GCF_014204815.1, s__Micrococcus flavus, 95.0, 84.08, 0.88; GCF_001570885.1, s__Micrococcus lylae, 95.0, 82.54, 0.8; GCF_014205175.1, s__Micrococcus cohnii, 95.0, 80.82, 0.68	82.35	11	N/A	N/A	SL310942	Subway	Cheung Sha Wan	22.3358	114.156	Underground	Subway air	Air	Air	NA	NA	NA	04/07 2017	Indoor	NA	NA	NA	NA
SL310943_bin.1	82.3069	2.00688	0.737544	2002222	566	4038	d__Bacteria	Actinobacteriota	Actinomycetia	o__Actinomycetales	f__Micrococcaceae	g__Micrococcus	s__Micrococcus luteus	GCF_000023205.1	95	d__Bacteria;p__Actinobacteriota;c__Actinomycetia;o__Actinomycetales;f__Micrococcaceae;g__Micrococcus;s__Micrococcus luteus	97.47	0.95	GCF_000023205.1	95	d__Bacteria;p__Actinobacteriota;c__Actinomycetia;o__Actinomycetales;f__Micrococcaceae;g__Micrococcus;s__Micrococcus luteus	97.47	0.95	d__Bacteria;p__Actinobacteriota;c__Actinomycetia;o__Actinomycetales;f__Micrococcaceae;g__Micrococcus;s__	taxonomic classification defined by topology and ANI	topological placement and ANI have congruent species assignments	GCF_014205115.1, s__Micrococcus endophyticus, 95.0, 89.64, 0.94; GCF_014204815.1, s__Micrococcus flavus, 95.0, 84.58, 0.89; GCF_001570885.1, s__Micrococcus lylae, 95.0, 83.19, 0.81; GCF_014205175.1, s__Micrococcus cohnii, 95.0, 81.33, 0.67	82.05	11	N/A	N/A	SL310943	Subway	Lai King	22.3487	114.126	Underground	Subway air	Air	Air	NA	NA	NA	04/07 2017	Indoor	NA	NA	NA	NA
SL310943_bin.2	72.8927	5.94269	0.442006	1911305	1041	1941	d__Bacteria	Proteobacteria	Gammaproteobacteria	o__Pseudomonadales	f__Moraxellaceae	g__Moraxella_A	s__Moraxella_A cinereus	GCA_014647715.1	95	d__Bacteria;p__Proteobacteria;c__Gammaproteobacteria;o__Pseudomonadales;f__Moraxellaceae;g__Moraxella_A;s__Moraxella_A cinereus	96.67	0.98	GCA_014647715.1	95	d__Bacteria;p__Proteobacteria;c__Gammaproteobacteria;o__Pseudomonadales;f__Moraxellaceae;g__Moraxella_A;s__Moraxella_A cinereus	96.67	0.98	d__Bacteria;p__Proteobacteria;c__Gammaproteobacteria;o__Pseudomonadales;f__Moraxellaceae;g__Moraxella_A;s__	taxonomic classification defined by topology and ANI	topological placement and ANI have congruent species assignments	GCF_001553955.1, s__Moraxella_A osloensis, 95.0237, 95.98, 0.93; GCF_009867135.1, s__Moraxella_A sp002478835, 95.0237, 95.37, 0.92; GCF_001591265.1, s__Moraxella_A atlantae, 95.0, 79.9, 0.31; GCF_000320365.1, s__Moraxella_A macacae, 95.0, 79.28, 0.16; GCF_000379845.1, s__Moraxella_A boevrei, 95.0, 78.58, 0.25	69.27	11	N/A	N/A	SL310943	Subway	Lai King	22.3487	114.126	Underground	Subway air	Air	Air	NA	NA	NA	04/07 2017	Indoor	NA	NA	NA	NA
SL310944_bin.2	87.2701	4.92737	0.736085	2215975	656	3939	d__Bacteria	Actinobacteriota	Actinomycetia	o__Actinomycetales	f__Micrococcaceae	g__Micrococcus	s__Micrococcus luteus	GCF_000023205.1	95	d__Bacteria;p__Actinobacteriota;c__Actinomycetia;o__Actinomycetales;f__Micrococcaceae;g__Micrococcus;s__Micrococcus luteus	97.34	0.94	GCF_000023205.1	95	d__Bacteria;p__Actinobacteriota;c__Actinomycetia;o__Actinomycetales;f__Micrococcaceae;g__Micrococcus;s__Micrococcus luteus	97.34	0.94	d__Bacteria;p__Actinobacteriota;c__Actinomycetia;o__Actinomycetales;f__Micrococcaceae;g__Micrococcus;s__	taxonomic classification defined by topology and ANI	topological placement and ANI have congruent species assignments	GCF_014205115.1, s__Micrococcus endophyticus, 95.0, 89.24, 0.92; GCF_014204815.1, s__Micrococcus flavus, 95.0, 84.67, 0.87; GCF_001570885.1, s__Micrococcus lylae, 95.0, 83.27, 0.75; GCF_014205175.1, s__Micrococcus cohnii, 95.0, 81.61, 0.68	84.38	11	N/A	N/A	SL310944	Subway	Tsing Yi	22.3592	114.107	Underground	Subway air	Air	Air	NA	NA	NA	04/07 2017	Indoor	NA	NA	NA	NA
SL310944_bin.3	74.0102	6.00255	0.442256	1724343	992	1781	d__Bacteria	Proteobacteria	Gammaproteobacteria	o__Pseudomonadales	f__Moraxellaceae	g__Moraxella_A	s__Moraxella_A cinereus	GCA_014647715.1	95	d__Bacteria;p__Proteobacteria;c__Gammaproteobacteria;o__Pseudomonadales;f__Moraxellaceae;g__Moraxella_A;s__Moraxella_A cinereus	96.88	0.97	N/A	N/A	N/A	N/A	N/A	d__Bacteria;p__Proteobacteria;c__Gammaproteobacteria;o__Pseudomonadales;f__Moraxellaceae;g__Moraxella_A;s__	ANI	topological placement and ANI have incongruent species assignments	GCA_014647715.1, s__Moraxella_A cinereus, 95.0, 96.88, 0.97; GCF_001553955.1, s__Moraxella_A osloensis, 95.0237, 96.31, 0.93; GCF_009867135.1, s__Moraxella_A sp002478835, 95.0237, 95.94, 0.88; GCF_001591265.1, s__Moraxella_A atlantae, 95.0, 79.65, 0.42; GCF_000379845.1, s__Moraxella_A boevrei, 95.0, 79.43, 0.32; GCF_000320365.1, s__Moraxella_A macacae, 95.0, 79.31, 0.23	67.26	11	N/A	N/A	SL310944	Subway	Tsing Yi	22.3592	114.107	Underground	Subway air	Air	Air	NA	NA	NA	04/07 2017	Indoor	NA	NA	NA	NA
SL310945_bin.1	88.2751	4.0964	0.736646	2141848	605	3964	d__Bacteria	Actinobacteriota	Actinomycetia	o__Actinomycetales	f__Micrococcaceae	g__Micrococcus	s__Micrococcus luteus	GCF_000023205.1	95	d__Bacteria;p__Actinobacteriota;c__Actinomycetia;o__Actinomycetales;f__Micrococcaceae;g__Micrococcus;s__Micrococcus luteus	97.3	0.94	GCF_000023205.1	95	d__Bacteria;p__Actinobacteriota;c__Actinomycetia;o__Actinomycetales;f__Micrococcaceae;g__Micrococcus;s__Micrococcus luteus	97.3	0.94	d__Bacteria;p__Actinobacteriota;c__Actinomycetia;o__Actinomycetales;f__Micrococcaceae;g__Micrococcus;s__	taxonomic classification defined by topology and ANI	topological placement and ANI have congruent species assignments	GCF_014205115.1, s__Micrococcus endophyticus, 95.0, 89.46, 0.92; GCF_014204815.1, s__Micrococcus flavus, 95.0, 84.81, 0.87; GCF_001570885.1, s__Micrococcus lylae, 95.0, 83.09, 0.78; GCF_014205175.1, s__Micrococcus cohnii, 95.0, 81.35, 0.71	84.44	11	N/A	N/A	SL310945	Subway	Yau Tong	22.2987	114.237	Underground	Subway air	Air	Air	NA	NA	NA	05/07 2017	Indoor	NA	NA	NA	NA
SL310945_bin.3	72.7451	5.14049	0.441749	1723675	990	1780	d__Bacteria	Proteobacteria	Gammaproteobacteria	o__Pseudomonadales	f__Moraxellaceae	g__Moraxella_A	s__Moraxella_A cinereus	GCA_014647715.1	95	d__Bacteria;p__Proteobacteria;c__Gammaproteobacteria;o__Pseudomonadales;f__Moraxellaceae;g__Moraxella_A;s__Moraxella_A cinereus	96.09	0.98	N/A	N/A	N/A	N/A	N/A	d__Bacteria;p__Proteobacteria;c__Gammaproteobacteria;o__Pseudomonadales;f__Moraxellaceae;g__Moraxella_A;s__	ANI	topological placement and ANI have incongruent species assignments	GCA_014647715.1, s__Moraxella_A cinereus, 95.0, 96.09, 0.98; GCF_001553955.1, s__Moraxella_A osloensis, 95.0237, 95.65, 0.93; GCF_009867135.1, s__Moraxella_A sp002478835, 95.0237, 95.64, 0.9; GCF_001591265.1, s__Moraxella_A atlantae, 95.0, 81.68, 0.25; GCF_000379845.1, s__Moraxella_A boevrei, 95.0, 78.91, 0.18; GCF_000320365.1, s__Moraxella_A macacae, 95.0, 78.74, 0.18	67.7	11	N/A	N/A	SL310945	Subway	Yau Tong	22.2987	114.237	Underground	Subway air	Air	Air	NA	NA	NA	05/07 2017	Indoor	NA	NA	NA	NA
SL310946_bin.1	91.035	3.58581	0.737857	2073799	586	3970	d__Bacteria	Actinobacteriota	Actinomycetia	o__Actinomycetales	f__Micrococcaceae	g__Micrococcus	s__Micrococcus luteus	GCF_000023205.1	95	d__Bacteria;p__Actinobacteriota;c__Actinomycetia;o__Actinomycetales;f__Micrococcaceae;g__Micrococcus;s__Micrococcus luteus	97.54	0.95	GCF_000023205.1	95	d__Bacteria;p__Actinobacteriota;c__Actinomycetia;o__Actinomycetales;f__Micrococcaceae;g__Micrococcus;s__Micrococcus luteus	97.54	0.95	d__Bacteria;p__Actinobacteriota;c__Actinomycetia;o__Actinomycetales;f__Micrococcaceae;g__Micrococcus;s__	taxonomic classification defined by topology and ANI	topological placement and ANI have congruent species assignments	GCF_014205115.1, s__Micrococcus endophyticus, 95.0, 89.32, 0.93; GCF_014204815.1, s__Micrococcus flavus, 95.0, 84.52, 0.88; GCF_001570885.1, s__Micrococcus lylae, 95.0, 82.86, 0.81; GCF_014205175.1, s__Micrococcus cohnii, 95.0, 81.28, 0.71	86	11	N/A	N/A	SL310946	Subway	Quarry Bay	22.2884	114.21	Underground	Subway air	Air	Air	NA	NA	NA	05/07 2017	Indoor	NA	NA	NA	NA
SL310946_bin.3	81.242	6.21009	0.440707	2249112	1202	1906	d__Bacteria	Proteobacteria	Gammaproteobacteria	o__Pseudomonadales	f__Moraxellaceae	g__Moraxella_A	s__Moraxella_A cinereus	GCA_014647715.1	95	d__Bacteria;p__Proteobacteria;c__Gammaproteobacteria;o__Pseudomonadales;f__Moraxellaceae;g__Moraxella_A;s__Moraxella_A cinereus	96.99	0.93	N/A	N/A	N/A	N/A	N/A	d__Bacteria;p__Proteobacteria;c__Gammaproteobacteria;o__Pseudomonadales;f__Moraxellaceae;g__Moraxella_A;s__	ANI	topological placement and ANI have incongruent species assignments	GCA_014647715.1, s__Moraxella_A cinereus, 95.0, 96.99, 0.93; GCF_001553955.1, s__Moraxella_A osloensis, 95.0237, 95.63, 0.84; GCF_009867135.1, s__Moraxella_A sp002478835, 95.0237, 95.32, 0.79; GCF_001591265.1, s__Moraxella_A atlantae, 95.0, 80.99, 0.23; GCF_000320365.1, s__Moraxella_A macacae, 95.0, 80.03, 0.12; GCF_000379845.1, s__Moraxella_A boevrei, 95.0, 79.77, 0.23	65.12	11	N/A	N/A	SL310946	Subway	Quarry Bay	22.2884	114.21	Underground	Subway air	Air	Air	NA	NA	NA	05/07 2017	Indoor	NA	NA	NA	NA
SL310947_bin.1	81.5493	2.70606	0.734988	2111375	682	3309	d__Bacteria	Actinobacteriota	Actinomycetia	o__Actinomycetales	f__Micrococcaceae	g__Micrococcus	s__Micrococcus luteus	GCF_000023205.1	95	d__Bacteria;p__Actinobacteriota;c__Actinomycetia;o__Actinomycetales;f__Micrococcaceae;g__Micrococcus;s__Micrococcus luteus	96.65	0.9	GCF_000023205.1	95	d__Bacteria;p__Actinobacteriota;c__Actinomycetia;o__Actinomycetales;f__Micrococcaceae;g__Micrococcus;s__Micrococcus luteus	96.65	0.9	d__Bacteria;p__Actinobacteriota;c__Actinomycetia;o__Actinomycetales;f__Micrococcaceae;g__Micrococcus;s__	taxonomic classification defined by topology and ANI	topological placement and ANI have congruent species assignments	GCF_014205115.1, s__Micrococcus endophyticus, 95.0, 89.17, 0.88; GCF_014204815.1, s__Micrococcus flavus, 95.0, 85.02, 0.84; GCF_001570885.1, s__Micrococcus lylae, 95.0, 83.1, 0.74; GCF_014205175.1, s__Micrococcus cohnii, 95.0, 81.62, 0.63	84.53	11	N/A	N/A	SL310947	Subway	North Point	22.2914	114.2	Underground	Subway air	Air	Air	NA	NA	NA	05/07 2017	Indoor	NA	NA	NA	NA
SL310947_bin.3	69.2329	7.4553	0.438581	1761127	1009	1794	d__Bacteria	Proteobacteria	Gammaproteobacteria	o__Pseudomonadales	f__Moraxellaceae	g__Moraxella_A	s__Moraxella_A cinereus	GCA_014647715.1	95	d__Bacteria;p__Proteobacteria;c__Gammaproteobacteria;o__Pseudomonadales;f__Moraxellaceae;g__Moraxella_A;s__Moraxella_A cinereus	96.95	0.96	GCA_014647715.1	95	d__Bacteria;p__Proteobacteria;c__Gammaproteobacteria;o__Pseudomonadales;f__Moraxellaceae;g__Moraxella_A;s__Moraxella_A cinereus	96.95	0.96	d__Bacteria;p__Proteobacteria;c__Gammaproteobacteria;o__Pseudomonadales;f__Moraxellaceae;g__Moraxella_A;s__	taxonomic classification defined by topology and ANI	topological placement and ANI have congruent species assignments	GCF_001553955.1, s__Moraxella_A osloensis, 95.0237, 96.09, 0.92; GCF_009867135.1, s__Moraxella_A sp002478835, 95.0237, 95.16, 0.88; GCF_001591265.1, s__Moraxella_A atlantae, 95.0, 80.5, 0.31; GCF_000379845.1, s__Moraxella_A boevrei, 95.0, 79.34, 0.22; GCF_000320365.1, s__Moraxella_A macacae, 95.0, 78.52, 0.18	57.55	11	N/A	N/A	SL310947	Subway	North Point	22.2914	114.2	Underground	Subway air	Air	Air	NA	NA	NA	05/07 2017	Indoor	NA	NA	NA	NA
SL310948_bin.1	83.4117	6.30094	0.693542	2107473	999	2291	d__Bacteria	Actinobacteriota	Actinomycetia	o__Actinomycetales	f__Micrococcaceae	g__Kocuria	s__Kocuria marina	GCA_014652975.1	95.811	d__Bacteria;p__Actinobacteriota;c__Actinomycetia;o__Actinomycetales;f__Micrococcaceae;g__Kocuria;s__Kocuria marina	98.09	0.87	GCA_014652975.1	95.811	d__Bacteria;p__Actinobacteriota;c__Actinomycetia;o__Actinomycetales;f__Micrococcaceae;g__Kocuria;s__Kocuria marina	98.09	0.87	d__Bacteria;p__Actinobacteriota;c__Actinomycetia;o__Actinomycetales;f__Micrococcaceae;g__Kocuria;s__	taxonomic classification defined by topology and ANI	topological placement and ANI have congruent species assignments	GCF_000786655.1, s__Kocuria marina_A, 95.811, 95.45, 0.87; GCF_000010285.1, s__Kocuria rhizophila_A, 95.0, 85.15, 0.81; GCF_007681555.1, s__Kocuria salsicia, 95.0, 84.88, 0.83; GCF_003226895.2, s__Kocuria sp003226895, 95.0, 84.64, 0.79; GCF_003667225.1, s__Kocuria rhizophila, 95.0, 84.4, 0.79; GCF_006539885.1, s__Kocuria varians, 95.0, 84.39, 0.8; GCF_003687455.1, s__Kocuria tytonicola, 95.0, 83.…	52.05	11	N/A	Genome has more than 13.3% of markers with multiple hits	SL310948	Subway	Fortress Hill	22.2885	114.194	Underground	Subway air	Air	Air	NA	NA	NA	05/07 2017	Indoor	NA	NA	NA	NA
SL310948_bin.2	87.0582	4.37327	0.738831	2082233	522	4665	d__Bacteria	Actinobacteriota	Actinomycetia	o__Actinomycetales	f__Micrococcaceae	g__Micrococcus	s__Micrococcus luteus	GCF_000023205.1	95	d__Bacteria;p__Actinobacteriota;c__Actinomycetia;o__Actinomycetales;f__Micrococcaceae;g__Micrococcus;s__Micrococcus luteus	97.34	0.94	GCF_000023205.1	95	d__Bacteria;p__Actinobacteriota;c__Actinomycetia;o__Actinomycetales;f__Micrococcaceae;g__Micrococcus;s__Micrococcus luteus	97.34	0.94	d__Bacteria;p__Actinobacteriota;c__Actinomycetia;o__Actinomycetales;f__Micrococcaceae;g__Micrococcus;s__	taxonomic classification defined by topology and ANI	topological placement and ANI have congruent species assignments	GCF_014205115.1, s__Micrococcus endophyticus, 95.0, 89.3, 0.93; GCF_014204815.1, s__Micrococcus flavus, 95.0, 84.74, 0.85; GCF_001570885.1, s__Micrococcus lylae, 95.0, 83.2, 0.78; GCF_014205175.1, s__Micrococcus cohnii, 95.0, 81.44, 0.65	78.64	11	N/A	N/A	SL310948	Subway	Fortress Hill	22.2885	114.194	Underground	Subway air	Air	Air	NA	NA	NA	05/07 2017	Indoor	NA	NA	NA	NA
SL310948_bin.3	52.3547	2.17513	0.442585	1255688	790	1586	d__Bacteria	Proteobacteria	Gammaproteobacteria	o__Pseudomonadales	f__Moraxellaceae	g__Moraxella_A	s__Moraxella_A cinereus	GCA_014647715.1	95	d__Bacteria;p__Proteobacteria;c__Gammaproteobacteria;o__Pseudomonadales;f__Moraxellaceae;g__Moraxella_A;s__Moraxella_A cinereus	96.72	0.9	GCF_001553955.1	95.0237	d__Bacteria;p__Proteobacteria;c__Gammaproteobacteria;o__Pseudomonadales;f__Moraxellaceae;g__Moraxella_A;s__Moraxella_A osloensis	95.01	0.9	d__Bacteria;p__Proteobacteria;c__Gammaproteobacteria;o__Pseudomonadales;f__Moraxellaceae;g__Moraxella_A;s__	ANI	topological placement and ANI have incongruent species assignments	GCF_009867135.1, s__Moraxella_A sp002478835, 95.0237, 94.54, 0.9; GCF_000379845.1, s__Moraxella_A boevrei, 95.0, 79.23, 0.32; GCF_000320365.1, s__Moraxella_A macacae, 95.0, 78.73, 0.16; GCF_001591265.1, s__Moraxella_A atlantae, 95.0, 78.21, 0.29	39.86	11	N/A	N/A	SL310948	Subway	Fortress Hill	22.2885	114.194	Underground	Subway air	Air	Air	NA	NA	NA	05/07 2017	Indoor	NA	NA	NA	NA
SL310949_bin.2	86.3609	4.71003	0.736581	2202170	593	4169	d__Bacteria	Actinobacteriota	Actinomycetia	o__Actinomycetales	f__Micrococcaceae	g__Micrococcus	s__Micrococcus luteus	GCF_000023205.1	95	d__Bacteria;p__Actinobacteriota;c__Actinomycetia;o__Actinomycetales;f__Micrococcaceae;g__Micrococcus;s__Micrococcus luteus	97.14	0.92	GCF_000023205.1	95	d__Bacteria;p__Actinobacteriota;c__Actinomycetia;o__Actinomycetales;f__Micrococcaceae;g__Micrococcus;s__Micrococcus luteus	97.14	0.92	d__Bacteria;p__Actinobacteriota;c__Actinomycetia;o__Actinomycetales;f__Micrococcaceae;g__Micrococcus;s__	taxonomic classification defined by topology and ANI	topological placement and ANI have congruent species assignments	GCF_014205115.1, s__Micrococcus endophyticus, 95.0, 89.27, 0.89; GCF_014204815.1, s__Micrococcus flavus, 95.0, 84.8, 0.87; GCF_001570885.1, s__Micrococcus lylae, 95.0, 83.12, 0.77; GCF_014205175.1, s__Micrococcus cohnii, 95.0, 81.42, 0.63	79.85	11	N/A	N/A	SL310949	Subway	Ocean Park	22.2491	114.175	Aboveground	Subway air	Air	Air	NA	NA	NA	05/07 2017	Outdoor	NA	NA	NA	NA
SL310949_bin.3	57.595	3.44828	0.441227	1421063	880	1597	d__Bacteria	Proteobacteria	Gammaproteobacteria	o__Pseudomonadales	f__Moraxellaceae	g__Moraxella_A	s__Moraxella_A cinereus	GCA_014647715.1	95	d__Bacteria;p__Proteobacteria;c__Gammaproteobacteria;o__Pseudomonadales;f__Moraxellaceae;g__Moraxella_A;s__Moraxella_A cinereus	97.64	0.97	N/A	N/A	N/A	N/A	N/A	d__Bacteria;p__Proteobacteria;c__Gammaproteobacteria;o__Pseudomonadales;f__Moraxellaceae;g__Moraxella_A;s__	ANI	topological placement and ANI have incongruent species assignments	GCA_014647715.1, s__Moraxella_A cinereus, 95.0, 97.64, 0.97; GCF_001553955.1, s__Moraxella_A osloensis, 95.0237, 96.29, 0.85; GCF_009867135.1, s__Moraxella_A sp002478835, 95.0237, 93.76, 0.8; GCF_001591265.1, s__Moraxella_A atlantae, 95.0, 84.05, 0.35; GCF_000379845.1, s__Moraxella_A boevrei, 95.0, 81.45, 0.35; GCF_000320365.1, s__Moraxella_A macacae, 95.0, 80.77, 0.25	49.97	11	N/A	N/A	SL310949	Subway	Ocean Park	22.2491	114.175	Aboveground	Subway air	Air	Air	NA	NA	NA	05/07 2017	Outdoor	NA	NA	NA	NA
SL310950_bin.3	63.0228	0.750319	0.440761	1662755	983	1724	d__Bacteria	Proteobacteria	Gammaproteobacteria	o__Pseudomonadales	f__Moraxellaceae	g__Moraxella_A	s__Moraxella_A cinereus	GCA_014647715.1	95	d__Bacteria;p__Proteobacteria;c__Gammaproteobacteria;o__Pseudomonadales;f__Moraxellaceae;g__Moraxella_A;s__Moraxella_A cinereus	96.77	0.97	N/A	N/A	N/A	N/A	N/A	d__Bacteria;p__Proteobacteria;c__Gammaproteobacteria;o__Pseudomonadales;f__Moraxellaceae;g__Moraxella_A;s__	ANI	topological placement and ANI have incongruent species assignments	GCA_014647715.1, s__Moraxella_A cinereus, 95.0, 96.77, 0.97; GCF_001553955.1, s__Moraxella_A osloensis, 95.0237, 96.13, 0.93; GCF_009867135.1, s__Moraxella_A sp002478835, 95.0237, 95.46, 0.88; GCF_001591265.1, s__Moraxella_A atlantae, 95.0, 81.98, 0.44; GCF_000320365.1, s__Moraxella_A macacae, 95.0, 81.06, 0.19; GCF_000379845.1, s__Moraxella_A boevrei, 95.0, 80.45, 0.24	57.75	11	N/A	N/A	SL310950	Subway	Admiralty	22.2797	114.165	Underground	Subway air	Air	Air	NA	NA	NA	05/07 2017	Indoor	NA	NA	NA	NA
SL310951_bin.1	82.02	5.81422	0.735522	2128071	625	3829	d__Bacteria	Actinobacteriota	Actinomycetia	o__Actinomycetales	f__Micrococcaceae	g__Micrococcus	s__Micrococcus luteus	GCF_000023205.1	95	d__Bacteria;p__Actinobacteriota;c__Actinomycetia;o__Actinomycetales;f__Micrococcaceae;g__Micrococcus;s__Micrococcus luteus	97.09	0.91	GCF_000023205.1	95	d__Bacteria;p__Actinobacteriota;c__Actinomycetia;o__Actinomycetales;f__Micrococcaceae;g__Micrococcus;s__Micrococcus luteus	97.09	0.91	d__Bacteria;p__Actinobacteriota;c__Actinomycetia;o__Actinomycetales;f__Micrococcaceae;g__Micrococcus;s__	taxonomic classification defined by topology and ANI	topological placement and ANI have congruent species assignments	GCF_014205115.1, s__Micrococcus endophyticus, 95.0, 89.05, 0.9; GCF_014204815.1, s__Micrococcus flavus, 95.0, 84.53, 0.84; GCF_001570885.1, s__Micrococcus lylae, 95.0, 82.78, 0.74; GCF_014205175.1, s__Micrococcus cohnii, 95.0, 81.76, 0.59	75.82	11	N/A	N/A	SL310951	Subway	Tsim Sha Tsui	22.2979	114.172	Underground	Subway air	Air	Air	NA	NA	NA	05/07 2017	Indoor	NA	NA	NA	NA
SL310951_bin.3	60.3688	3.03321	0.440747	1385460	890	1531	d__Bacteria	Proteobacteria	Gammaproteobacteria	o__Pseudomonadales	f__Moraxellaceae	g__Moraxella_A	s__Moraxella_A cinereus	GCA_014647715.1	95	d__Bacteria;p__Proteobacteria;c__Gammaproteobacteria;o__Pseudomonadales;f__Moraxellaceae;g__Moraxella_A;s__Moraxella_A cinereus	96.36	0.95	N/A	N/A	N/A	N/A	N/A	d__Bacteria;p__Proteobacteria;c__Gammaproteobacteria;o__Pseudomonadales;f__Moraxellaceae;g__Moraxella_A;s__	ANI	topological placement and ANI have incongruent species assignments	GCA_014647715.1, s__Moraxella_A cinereus, 95.0, 96.36, 0.95; GCF_009867135.1, s__Moraxella_A sp002478835, 95.0237, 94.9, 0.92; GCF_001553955.1, s__Moraxella_A osloensis, 95.0237, 94.87, 0.97; GCF_000379845.1, s__Moraxella_A boevrei, 95.0, 80.92, 0.27; GCF_000320365.1, s__Moraxella_A macacae, 95.0, 80.32, 0.24; GCF_001591265.1, s__Moraxella_A atlantae, 95.0, 78.68, 0.22	52.41	11	N/A	N/A	SL310951	Subway	Tsim Sha Tsui	22.2979	114.172	Underground	Subway air	Air	Air	NA	NA	NA	05/07 2017	Indoor	NA	NA	NA	NA
SL310952_bin.1	85.8259	6.14515	0.737465	2169116	593	4403	d__Bacteria	Actinobacteriota	Actinomycetia	o__Actinomycetales	f__Micrococcaceae	g__Micrococcus	s__Micrococcus luteus	GCF_000023205.1	95	d__Bacteria;p__Actinobacteriota;c__Actinomycetia;o__Actinomycetales;f__Micrococcaceae;g__Micrococcus;s__Micrococcus luteus	97.41	0.92	GCF_000023205.1	95	d__Bacteria;p__Actinobacteriota;c__Actinomycetia;o__Actinomycetales;f__Micrococcaceae;g__Micrococcus;s__Micrococcus luteus	97.41	0.92	d__Bacteria;p__Actinobacteriota;c__Actinomycetia;o__Actinomycetales;f__Micrococcaceae;g__Micrococcus;s__	taxonomic classification defined by topology and ANI	topological placement and ANI have congruent species assignments	GCF_014205115.1, s__Micrococcus endophyticus, 95.0, 89.37, 0.9; GCF_014204815.1, s__Micrococcus flavus, 95.0, 84.82, 0.87; GCF_001570885.1, s__Micrococcus lylae, 95.0, 82.98, 0.76; GCF_014205175.1, s__Micrococcus cohnii, 95.0, 81.22, 0.64	84.63	11	N/A	N/A	SL310952	Subway	East Tsim Sha Tsui	22.2953	114.174	Underground	Subway air	Air	Air	NA	NA	NA	05/07 2017	Indoor	NA	NA	NA	NA
SL310952_bin.2	63.0388	3.30859	0.441718	1515823	912	1677	d__Bacteria	Proteobacteria	Gammaproteobacteria	o__Pseudomonadales	f__Moraxellaceae	g__Moraxella_A	s__Moraxella_A cinereus	GCA_014647715.1	95	d__Bacteria;p__Proteobacteria;c__Gammaproteobacteria;o__Pseudomonadales;f__Moraxellaceae;g__Moraxella_A;s__Moraxella_A cinereus	96.65	0.73	N/A	N/A	N/A	N/A	N/A	d__Bacteria;p__Proteobacteria;c__Gammaproteobacteria;o__Pseudomonadales;f__Moraxellaceae;g__Moraxella_A;s__	ANI	topological placement and ANI have incongruent species assignments	GCA_014647715.1, s__Moraxella_A cinereus, 95.0, 96.65, 0.73; GCF_001553955.1, s__Moraxella_A osloensis, 95.0237, 96.02, 0.73; GCF_009867135.1, s__Moraxella_A sp002478835, 95.0237, 95.35, 0.64; GCF_000379845.1, s__Moraxella_A boevrei, 95.0, 83.41, 0.27; GCF_000320365.1, s__Moraxella_A macacae, 95.0, 82.06, 0.18; GCF_001591265.1, s__Moraxella_A atlantae, 95.0, 81.69, 0.29	62.8	11	N/A	N/A	SL310952	Subway	East Tsim Sha Tsui	22.2953	114.174	Underground	Subway air	Air	Air	NA	NA	NA	05/07 2017	Indoor	NA	NA	NA	NA
SL310952_bin.3	60.6322	5.17241	0.707753	1748294	459	4257	d__Bacteria	Proteobacteria	Alphaproteobacteria	o__Rhodobacterales	f__Rhodobacteraceae	g__Paracoccus	s__Paracoccus marinus	GCF_007018965.1	95	d__Bacteria;p__Proteobacteria;c__Alphaproteobacteria;o__Rhodobacterales;f__Rhodobacteraceae;g__Paracoccus;s__Paracoccus marinus	96.93	0.99	GCF_007018965.1	95	d__Bacteria;p__Proteobacteria;c__Alphaproteobacteria;o__Rhodobacterales;f__Rhodobacteraceae;g__Paracoccus;s__Paracoccus marinus	96.93	0.99	d__Bacteria;p__Proteobacteria;c__Alphaproteobacteria;o__Rhodobacterales;f__Rhodobacteraceae;g__Paracoccus;s__	taxonomic classification defined by topology and ANI	topological placement and ANI have congruent species assignments	GCF_004923205.2, s__Paracoccus aeridis, 95.0, 87.37, 0.92; GCF_004522155.1, s__Paracoccus luteus, 95.0, 81.84, 0.75; GCF_002287065.1, s__Paracoccus salipaludis, 95.0, 81.83, 0.71; GCF_000763805.1, s__Paracoccus sphaerophysae, 95.0, 81.45, 0.73; GCF_003286075.1, s__Paracoccus endophyticus, 95.0, 81.4, 0.71; GCF_900102885.1, s__Paracoccus chinensis, 95.0, 81.24, 0.7; GCF_900106665.1, s__Paracoccus …	42.11	11	N/A	N/A	SL310952	Subway	East Tsim Sha Tsui	22.2953	114.174	Underground	Subway air	Air	Air	NA	NA	NA	05/07 2017	Indoor	NA	NA	NA	NA
SL310952_bin.4	74.2615	5.90657	0.695042	2811740	954	3171	d__Bacteria	Proteobacteria	Alphaproteobacteria	o__Rhodobacterales	f__Rhodobacteraceae	g__Paracoccus	s__Paracoccus salipaludis	GCF_002287065.1	95	d__Bacteria;p__Proteobacteria;c__Alphaproteobacteria;o__Rhodobacterales;f__Rhodobacteraceae;g__Paracoccus;s__Paracoccus salipaludis	97.91	0.91	GCF_002287065.1	95	d__Bacteria;p__Proteobacteria;c__Alphaproteobacteria;o__Rhodobacterales;f__Rhodobacteraceae;g__Paracoccus;s__Paracoccus salipaludis	97.91	0.91	d__Bacteria;p__Proteobacteria;c__Alphaproteobacteria;o__Rhodobacterales;f__Rhodobacteraceae;g__Paracoccus;s__	taxonomic classification defined by topology and ANI	topological placement and ANI have congruent species assignments	GCF_900102885.1, s__Paracoccus chinensis, 95.0, 90.72, 0.84; GCF_014164625.1, s__Paracoccus sp014164625, 95.0, 86.5, 0.77; GCF_007018965.1, s__Paracoccus marinus, 95.0, 83.49, 0.67; GCF_004522155.1, s__Paracoccus luteus, 95.0, 83.13, 0.72; GCF_000763805.1, s__Paracoccus sphaerophysae, 95.0, 82.94, 0.74; GCF_900106665.1, s__Paracoccus sanguinis, 95.0, 82.76, 0.78; GCF_900142875.1, s__Paracoccus so…	47.35	11	N/A	N/A	SL310952	Subway	East Tsim Sha Tsui	22.2953	114.174	Underground	Subway air	Air	Air	NA	NA	NA	05/07 2017	Indoor	NA	NA	NA	NA
SL310953_bin.2	63.7271	0.688073	0.742106	1527786	560	2833	d__Bacteria	Actinobacteriota	Actinomycetia	o__Actinomycetales	f__Micrococcaceae	g__Micrococcus	s__Micrococcus luteus	GCF_000023205.1	95	d__Bacteria;p__Actinobacteriota;c__Actinomycetia;o__Actinomycetales;f__Micrococcaceae;g__Micrococcus;s__Micrococcus luteus	97.56	0.98	GCF_000023205.1	95	d__Bacteria;p__Actinobacteriota;c__Actinomycetia;o__Actinomycetales;f__Micrococcaceae;g__Micrococcus;s__Micrococcus luteus	97.56	0.98	d__Bacteria;p__Actinobacteriota;c__Actinomycetia;o__Actinomycetales;f__Micrococcaceae;g__Micrococcus;s__	taxonomic classification defined by topology and ANI	topological placement and ANI have congruent species assignments	GCF_014205115.1, s__Micrococcus endophyticus, 95.0, 89.8, 0.96; GCF_014204815.1, s__Micrococcus flavus, 95.0, 84.06, 0.92; GCF_001570885.1, s__Micrococcus lylae, 95.0, 82.4, 0.83; GCF_014205175.1, s__Micrococcus cohnii, 95.0, 81.01, 0.7	54.73	11	N/A	N/A	SL310953	Subway	Hung Hom	22.3036	114.181	Aboveground	Subway air	Air	Air	NA	NA	NA	05/07 2017	Indoor	NA	NA	NA	NA
SL310953_bin.3	70.993	3.85137	0.440322	1828014	1036	1809	d__Bacteria	Proteobacteria	Gammaproteobacteria	o__Pseudomonadales	f__Moraxellaceae	g__Moraxella_A	s__Moraxella_A cinereus	GCA_014647715.1	95	d__Bacteria;p__Proteobacteria;c__Gammaproteobacteria;o__Pseudomonadales;f__Moraxellaceae;g__Moraxella_A;s__Moraxella_A cinereus	97.14	0.94	N/A	N/A	N/A	N/A	N/A	d__Bacteria;p__Proteobacteria;c__Gammaproteobacteria;o__Pseudomonadales;f__Moraxellaceae;g__Moraxella_A;s__	ANI	topological placement and ANI have incongruent species assignments	GCA_014647715.1, s__Moraxella_A cinereus, 95.0, 97.14, 0.94; GCF_001553955.1, s__Moraxella_A osloensis, 95.0237, 96.11, 0.89; GCF_009867135.1, s__Moraxella_A sp002478835, 95.0237, 95.31, 0.8; GCF_001591265.1, s__Moraxella_A atlantae, 95.0, 81.43, 0.31; GCF_000379845.1, s__Moraxella_A boevrei, 95.0, 79.21, 0.24; GCF_000320365.1, s__Moraxella_A macacae, 95.0, 79.12, 0.15	61.21	11	N/A	N/A	SL310953	Subway	Hung Hom	22.3036	114.181	Aboveground	Subway air	Air	Air	NA	NA	NA	05/07 2017	Indoor	NA	NA	NA	NA
SL310954_bin.1	58.8175	1.46243	0.736073	1229533	767	1592	d__Bacteria	Actinobacteriota	Actinomycetia	o__Actinomycetales	f__Micrococcaceae	g__Micrococcus	s__Micrococcus luteus	GCF_000023205.1	95	d__Bacteria;p__Actinobacteriota;c__Actinomycetia;o__Actinomycetales;f__Micrococcaceae;g__Micrococcus;s__Micrococcus luteus	97.82	1	GCF_000023205.1	95	d__Bacteria;p__Actinobacteriota;c__Actinomycetia;o__Actinomycetales;f__Micrococcaceae;g__Micrococcus;s__Micrococcus luteus	97.82	1	d__Bacteria;p__Actinobacteriota;c__Actinomycetia;o__Actinomycetales;f__Micrococcaceae;g__Micrococcus;s__	taxonomic classification defined by topology and ANI	topological placement and ANI have congruent species assignments	GCF_014205115.1, s__Micrococcus endophyticus, 95.0, 91.09, 1.0; GCF_014204815.1, s__Micrococcus flavus, 95.0, 84.38, 0.95; GCF_014205175.1, s__Micrococcus cohnii, 95.0, 82.53, 0.66; GCF_001570885.1, s__Micrococcus lylae, 95.0, 82.02, 0.84	47.49	11	N/A	N/A	SL310954	Subway	Mong Kok East	22.3226	114.172	Aboveground	Subway air	Air	Air	NA	NA	NA	05/07 2017	Indoor	NA	NA	NA	NA
SL310954_bin.3	61.6778	1.21727	0.441792	1499286	912	1672	d__Bacteria	Proteobacteria	Gammaproteobacteria	o__Pseudomonadales	f__Moraxellaceae	g__Moraxella_A	s__Moraxella_A cinereus	GCA_014647715.1	95	d__Bacteria;p__Proteobacteria;c__Gammaproteobacteria;o__Pseudomonadales;f__Moraxellaceae;g__Moraxella_A;s__Moraxella_A cinereus	96.98	0.98	N/A	N/A	N/A	N/A	N/A	d__Bacteria;p__Proteobacteria;c__Gammaproteobacteria;o__Pseudomonadales;f__Moraxellaceae;g__Moraxella_A;s__	ANI	topological placement and ANI have incongruent species assignments	GCA_014647715.1, s__Moraxella_A cinereus, 95.0, 96.98, 0.98; GCF_001553955.1, s__Moraxella_A osloensis, 95.0237, 96.24, 0.93; GCF_009867135.1, s__Moraxella_A sp002478835, 95.0237, 95.77, 0.83; GCF_000320365.1, s__Moraxella_A macacae, 95.0, 83.05, 0.07; GCF_001591265.1, s__Moraxella_A atlantae, 95.0, 82.26, 0.37; GCF_000379845.1, s__Moraxella_A boevrei, 95.0, 79.53, 0.29	51.6	11	N/A	N/A	SL310954	Subway	Mong Kok East	22.3226	114.172	Aboveground	Subway air	Air	Air	NA	NA	NA	05/07 2017	Indoor	NA	NA	NA	NA
SL310955_bin.1	68.0715	2.65405	0.439474	1690093	643	2659	d__Bacteria	Proteobacteria	Gammaproteobacteria	o__Pseudomonadales	f__Moraxellaceae	g__Moraxella_A	s__Moraxella_A cinereus	GCA_014647715.1	95	d__Bacteria;p__Proteobacteria;c__Gammaproteobacteria;o__Pseudomonadales;f__Moraxellaceae;g__Moraxella_A;s__Moraxella_A cinereus	96.36	0.93	GCF_009867135.1	95.0237	d__Bacteria;p__Proteobacteria;c__Gammaproteobacteria;o__Pseudomonadales;f__Moraxellaceae;g__Moraxella_A;s__Moraxella_A sp002478835	93.99	0.89	d__Bacteria;p__Proteobacteria;c__Gammaproteobacteria;o__Pseudomonadales;f__Moraxellaceae;g__Moraxella_A;s__	ANI	topological placement and ANI have incongruent species assignments	GCF_001553955.1, s__Moraxella_A osloensis, 95.0237, 95.18, 0.91; GCF_001591265.1, s__Moraxella_A atlantae, 95.0, 79.1, 0.25; GCF_000379845.1, s__Moraxella_A boevrei, 95.0, 78.99, 0.25; GCF_000320365.1, s__Moraxella_A macacae, 95.0, 77.49, 0.23	63.35	11	N/A	N/A	SL310955	Subway	Kowloon Tong	22.3372	114.176	Aboveground	Subway air	Air	Air	NA	NA	NA	06/07 2017	Outdoor	NA	NA	NA	NA
SL310955_bin.2	53.605	1.72414	0.689244	2013327	506	5230	d__Bacteria	Proteobacteria	Alphaproteobacteria	o__Rhodobacterales	f__Rhodobacteraceae	g__Paracoccus	s__Paracoccus salipaludis	GCF_002287065.1	95	d__Bacteria;p__Proteobacteria;c__Alphaproteobacteria;o__Rhodobacterales;f__Rhodobacteraceae;g__Paracoccus;s__Paracoccus salipaludis	99.08	0.98	GCF_002287065.1	95	d__Bacteria;p__Proteobacteria;c__Alphaproteobacteria;o__Rhodobacterales;f__Rhodobacteraceae;g__Paracoccus;s__Paracoccus salipaludis	99.08	0.98	d__Bacteria;p__Proteobacteria;c__Alphaproteobacteria;o__Rhodobacterales;f__Rhodobacteraceae;g__Paracoccus;s__	taxonomic classification defined by topology and ANI	topological placement and ANI have congruent species assignments	GCF_900102885.1, s__Paracoccus chinensis, 95.0, 91.44, 0.88; GCF_014164625.1, s__Paracoccus sp014164625, 95.0, 87.23, 0.8; GCF_900142875.1, s__Paracoccus solventivorans, 95.0, 83.81, 0.71; GCF_000763805.1, s__Paracoccus sphaerophysae, 95.0, 83.66, 0.73; GCF_003286075.1, s__Paracoccus endophyticus, 95.0, 83.42, 0.75; GCF_004522155.1, s__Paracoccus luteus, 95.0, 83.36, 0.75; GCF_900106665.1, s__Par…	41.1	11	N/A	N/A	SL310955	Subway	Kowloon Tong	22.3372	114.176	Aboveground	Subway air	Air	Air	NA	NA	NA	06/07 2017	Outdoor	NA	NA	NA	NA
SL310955_bin.3	55.3292	6.89655	0.712929	2293169	727	3410	d__Bacteria	Proteobacteria	Alphaproteobacteria	o__Rhodobacterales	f__Rhodobacteraceae	g__Paracoccus	s__	N/A	N/A	N/A	N/A	N/A	GCF_007018965.1	95	d__Bacteria;p__Proteobacteria;c__Alphaproteobacteria;o__Rhodobacterales;f__Rhodobacteraceae;g__Paracoccus;s__Paracoccus marinus	94.96	0.86	d__Bacteria;p__Proteobacteria;c__Alphaproteobacteria;o__Rhodobacterales;f__Rhodobacteraceae;g__Paracoccus;s__	taxonomic classification defined by topology and ANI	N/A	GCF_004923205.2, s__Paracoccus aeridis, 95.0, 86.76, 0.81; GCF_002287065.1, s__Paracoccus salipaludis, 95.0, 86.66, 0.72; GCF_900102885.1, s__Paracoccus chinensis, 95.0, 83.83, 0.7; GCF_014164625.1, s__Paracoccus sp014164625, 95.0, 82.41, 0.69; GCF_000763805.1, s__Paracoccus sphaerophysae, 95.0, 81.68, 0.68; GCF_004522155.1, s__Paracoccus luteus, 95.0, 81.64, 0.71; GCF_003286075.1, s__Paracoccus …	40.18	11	0.997615	Genome not assigned to closest species as it falls outside its pre-defined ANI radius	SL310955	Subway	Kowloon Tong	22.3372	114.176	Aboveground	Subway air	Air	Air	NA	NA	NA	06/07 2017	Outdoor	NA	NA	NA	NA
SL310955_bin.5	56.4622	1.37615	0.741547	1101301	681	1633	d__Bacteria	Actinobacteriota	Actinomycetia	o__Actinomycetales	f__Micrococcaceae	g__Micrococcus	s__Micrococcus luteus	GCF_000023205.1	95	d__Bacteria;p__Actinobacteriota;c__Actinomycetia;o__Actinomycetales;f__Micrococcaceae;g__Micrococcus;s__Micrococcus luteus	97.43	1	GCF_000023205.1	95	d__Bacteria;p__Actinobacteriota;c__Actinomycetia;o__Actinomycetales;f__Micrococcaceae;g__Micrococcus;s__Micrococcus luteus	97.43	1	d__Bacteria;p__Actinobacteriota;c__Actinomycetia;o__Actinomycetales;f__Micrococcaceae;g__Micrococcus;s__	taxonomic classification defined by topology and ANI	topological placement and ANI have congruent species assignments	GCF_014205115.1, s__Micrococcus endophyticus, 95.0, 89.6, 1.0; GCF_014204815.1, s__Micrococcus flavus, 95.0, 81.52, 0.94; GCF_001570885.1, s__Micrococcus lylae, 95.0, 80.52, 0.71; GCF_014205175.1, s__Micrococcus cohnii, 95.0, 78.87, 0.71	45.72	11	N/A	N/A	SL310955	Subway	Kowloon Tong	22.3372	114.176	Aboveground	Subway air	Air	Air	NA	NA	NA	06/07 2017	Outdoor	NA	NA	NA	NA
SL310956_bin.1	71.3634	2.30341	0.746637	1666874	644	3104	d__Bacteria	Actinobacteriota	Actinomycetia	o__Actinomycetales	f__Micrococcaceae	g__Micrococcus	s__Micrococcus luteus	GCF_000023205.1	95	d__Bacteria;p__Actinobacteriota;c__Actinomycetia;o__Actinomycetales;f__Micrococcaceae;g__Micrococcus;s__Micrococcus luteus	97.47	0.98	GCF_000023205.1	95	d__Bacteria;p__Actinobacteriota;c__Actinomycetia;o__Actinomycetales;f__Micrococcaceae;g__Micrococcus;s__Micrococcus luteus	97.47	0.98	d__Bacteria;p__Actinobacteriota;c__Actinomycetia;o__Actinomycetales;f__Micrococcaceae;g__Micrococcus;s__	taxonomic classification defined by topology and ANI	topological placement and ANI have congruent species assignments	GCF_014205115.1, s__Micrococcus endophyticus, 95.0, 88.52, 0.95; GCF_014204815.1, s__Micrococcus flavus, 95.0, 82.9, 0.87; GCF_001570885.1, s__Micrococcus lylae, 95.0, 81.5, 0.84; GCF_014205175.1, s__Micrococcus cohnii, 95.0, 80.26, 0.66	53.7	11	N/A	N/A	SL310956	Subway	Tai Wai	22.373	114.179	Aboveground	Subway air	Air	Air	NA	NA	NA	06/07 2017	Outdoor	NA	NA	NA	NA
SL310956_bin.2	60.3448	6.89655	0.706511	2195994	568	4604	d__Bacteria	Proteobacteria	Alphaproteobacteria	o__Rhodobacterales	f__Rhodobacteraceae	g__Paracoccus	s__Paracoccus marinus	GCF_007018965.1	95	d__Bacteria;p__Proteobacteria;c__Alphaproteobacteria;o__Rhodobacterales;f__Rhodobacteraceae;g__Paracoccus;s__Paracoccus marinus	97.04	0.97	GCF_007018965.1	95	d__Bacteria;p__Proteobacteria;c__Alphaproteobacteria;o__Rhodobacterales;f__Rhodobacteraceae;g__Paracoccus;s__Paracoccus marinus	97.04	0.97	d__Bacteria;p__Proteobacteria;c__Alphaproteobacteria;o__Rhodobacterales;f__Rhodobacteraceae;g__Paracoccus;s__	taxonomic classification defined by topology and ANI	topological placement and ANI have congruent species assignments	GCF_004923205.2, s__Paracoccus aeridis, 95.0, 87.53, 0.91; GCF_002287065.1, s__Paracoccus salipaludis, 95.0, 81.89, 0.7; GCF_900102885.1, s__Paracoccus chinensis, 95.0, 81.5, 0.68; GCF_004522155.1, s__Paracoccus luteus, 95.0, 81.47, 0.74; GCF_900106665.1, s__Paracoccus sanguinis, 95.0, 81.32, 0.72; GCF_000763805.1, s__Paracoccus sphaerophysae, 95.0, 81.31, 0.69; GCF_003286075.1, s__Paracoccus end…	43.72	11	N/A	N/A	SL310956	Subway	Tai Wai	22.373	114.179	Aboveground	Subway air	Air	Air	NA	NA	NA	06/07 2017	Outdoor	NA	NA	NA	NA
SL310956_bin.3	74.4373	2.7219	0.440538	1808925	1011	1843	d__Bacteria	Proteobacteria	Gammaproteobacteria	o__Pseudomonadales	f__Moraxellaceae	g__Moraxella_A	s__Moraxella_A cinereus	GCA_014647715.1	95	d__Bacteria;p__Proteobacteria;c__Gammaproteobacteria;o__Pseudomonadales;f__Moraxellaceae;g__Moraxella_A;s__Moraxella_A cinereus	96.87	0.99	N/A	N/A	N/A	N/A	N/A	d__Bacteria;p__Proteobacteria;c__Gammaproteobacteria;o__Pseudomonadales;f__Moraxellaceae;g__Moraxella_A;s__	ANI	topological placement and ANI have incongruent species assignments	GCA_014647715.1, s__Moraxella_A cinereus, 95.0, 96.87, 0.99; GCF_009867135.1, s__Moraxella_A sp002478835, 95.0237, 95.87, 0.89; GCF_001553955.1, s__Moraxella_A osloensis, 95.0237, 95.62, 0.93; GCF_000379845.1, s__Moraxella_A boevrei, 95.0, 80.5, 0.24; GCF_001591265.1, s__Moraxella_A atlantae, 95.0, 80.38, 0.31; GCF_000320365.1, s__Moraxella_A macacae, 95.0, 79.43, 0.18	61.29	11	N/A	Genome has more than 10.0% of markers with multiple hits	SL310956	Subway	Tai Wai	22.373	114.179	Aboveground	Subway air	Air	Air	NA	NA	NA	06/07 2017	Outdoor	NA	NA	NA	NA
SL310956_bin.4	69.0543	2.42424	0.696529	2342435	748	3420	d__Bacteria	Proteobacteria	Alphaproteobacteria	o__Rhodobacterales	f__Rhodobacteraceae	g__Paracoccus	s__Paracoccus salipaludis	GCF_002287065.1	95	d__Bacteria;p__Proteobacteria;c__Alphaproteobacteria;o__Rhodobacterales;f__Rhodobacteraceae;g__Paracoccus;s__Paracoccus salipaludis	98.54	0.97	GCF_002287065.1	95	d__Bacteria;p__Proteobacteria;c__Alphaproteobacteria;o__Rhodobacterales;f__Rhodobacteraceae;g__Paracoccus;s__Paracoccus salipaludis	98.54	0.97	d__Bacteria;p__Proteobacteria;c__Alphaproteobacteria;o__Rhodobacterales;f__Rhodobacteraceae;g__Paracoccus;s__	taxonomic classification defined by topology and ANI	topological placement and ANI have congruent species assignments	GCF_900102885.1, s__Paracoccus chinensis, 95.0, 91.1, 0.92; GCF_014164625.1, s__Paracoccus sp014164625, 95.0, 87.31, 0.83; GCF_900142875.1, s__Paracoccus solventivorans, 95.0, 83.48, 0.74; GCF_000763805.1, s__Paracoccus sphaerophysae, 95.0, 83.21, 0.76; GCF_900106665.1, s__Paracoccus sanguinis, 95.0, 83.06, 0.8; GCF_004522155.1, s__Paracoccus luteus, 95.0, 82.79, 0.77; GCF_003286075.1, s__Paracoc…	43.93	11	N/A	N/A	SL310956	Subway	Tai Wai	22.373	114.179	Aboveground	Subway air	Air	Air	NA	NA	NA	06/07 2017	Outdoor	NA	NA	NA	NA
SL310957_bin.1	60.5016	3.44828	0.708571	2155729	935	2581	d__Bacteria	Proteobacteria	Alphaproteobacteria	o__Rhodobacterales	f__Rhodobacteraceae	g__Paracoccus	s__Paracoccus marinus	GCF_007018965.1	95	d__Bacteria;p__Proteobacteria;c__Alphaproteobacteria;o__Rhodobacterales;f__Rhodobacteraceae;g__Paracoccus;s__Paracoccus marinus	96.81	0.98	GCF_007018965.1	95	d__Bacteria;p__Proteobacteria;c__Alphaproteobacteria;o__Rhodobacterales;f__Rhodobacteraceae;g__Paracoccus;s__Paracoccus marinus	96.81	0.98	d__Bacteria;p__Proteobacteria;c__Alphaproteobacteria;o__Rhodobacterales;f__Rhodobacteraceae;g__Paracoccus;s__	taxonomic classification defined by topology and ANI	topological placement and ANI have congruent species assignments	GCF_004923205.2, s__Paracoccus aeridis, 95.0, 87.51, 0.91; GCF_002287065.1, s__Paracoccus salipaludis, 95.0, 81.7, 0.7; GCF_004522155.1, s__Paracoccus luteus, 95.0, 81.4, 0.72; GCF_900102885.1, s__Paracoccus chinensis, 95.0, 81.32, 0.7; GCF_900106665.1, s__Paracoccus sanguinis, 95.0, 80.96, 0.71; GCF_000763805.1, s__Paracoccus sphaerophysae, 95.0, 80.94, 0.72; GCF_014164625.1, s__Paracoccus sp014…	35.4	11	N/A	N/A	SL310957	Subway	Che Kung Temple	22.3748	114.186	Aboveground	Subway air	Air	Air	NA	NA	NA	06/07 2017	Outdoor	NA	NA	NA	NA
SL310958_bin.1	85.7946	3.68884	0.738152	2005933	760	3181	d__Bacteria	Actinobacteriota	Actinomycetia	o__Actinomycetales	f__Micrococcaceae	g__Micrococcus	s__Micrococcus luteus	GCF_000023205.1	95	d__Bacteria;p__Actinobacteriota;c__Actinomycetia;o__Actinomycetales;f__Micrococcaceae;g__Micrococcus;s__Micrococcus luteus	97.49	0.97	GCF_000023205.1	95	d__Bacteria;p__Actinobacteriota;c__Actinomycetia;o__Actinomycetales;f__Micrococcaceae;g__Micrococcus;s__Micrococcus luteus	97.49	0.97	d__Bacteria;p__Actinobacteriota;c__Actinomycetia;o__Actinomycetales;f__Micrococcaceae;g__Micrococcus;s__	taxonomic classification defined by topology and ANI	topological placement and ANI have congruent species assignments	GCF_014205115.1, s__Micrococcus endophyticus, 95.0, 89.43, 0.97; GCF_014204815.1, s__Micrococcus flavus, 95.0, 84.32, 0.92; GCF_001570885.1, s__Micrococcus lylae, 95.0, 82.87, 0.81; GCF_014205175.1, s__Micrococcus cohnii, 95.0, 81.22, 0.7	72.82	11	N/A	N/A	SL310958	Subway	Sha Tin Wai	22.3769	114.195	Aboveground	Subway air	Air	Air	NA	NA	NA	06/07 2017	Outdoor	NA	NA	NA	NA
SL310958_bin.2	83.0166	6.22902	0.699933	2632510	664	4704	d__Bacteria	Proteobacteria	Alphaproteobacteria	o__Rhodobacterales	f__Rhodobacteraceae	g__Paracoccus	s__Paracoccus marinus	GCF_007018965.1	95	d__Bacteria;p__Proteobacteria;c__Alphaproteobacteria;o__Rhodobacterales;f__Rhodobacteraceae;g__Paracoccus;s__Paracoccus marinus	97.07	0.97	GCF_007018965.1	95	d__Bacteria;p__Proteobacteria;c__Alphaproteobacteria;o__Rhodobacterales;f__Rhodobacteraceae;g__Paracoccus;s__Paracoccus marinus	97.07	0.97	d__Bacteria;p__Proteobacteria;c__Alphaproteobacteria;o__Rhodobacterales;f__Rhodobacteraceae;g__Paracoccus;s__	taxonomic classification defined by topology and ANI	topological placement and ANI have congruent species assignments	GCF_004923205.2, s__Paracoccus aeridis, 95.0, 87.95, 0.89; GCF_000763805.1, s__Paracoccus sphaerophysae, 95.0, 82.21, 0.7; GCF_004522155.1, s__Paracoccus luteus, 95.0, 82.17, 0.72; GCF_002287065.1, s__Paracoccus salipaludis, 95.0, 82.04, 0.69; GCF_003286075.1, s__Paracoccus endophyticus, 95.0, 81.9, 0.7; GCF_900106665.1, s__Paracoccus sanguinis, 95.0, 81.85, 0.72; GCF_900102885.1, s__Paracoccus c…	73.12	11	N/A	N/A	SL310958	Subway	Sha Tin Wai	22.3769	114.195	Aboveground	Subway air	Air	Air	NA	NA	NA	06/07 2017	Outdoor	NA	NA	NA	NA
SL310959_bin.1	61.1909	0.893997	0.439364	1400547	549	2568	d__Bacteria	Proteobacteria	Gammaproteobacteria	o__Pseudomonadales	f__Moraxellaceae	g__Moraxella_A	s__Moraxella_A cinereus	GCA_014647715.1	95	d__Bacteria;p__Proteobacteria;c__Gammaproteobacteria;o__Pseudomonadales;f__Moraxellaceae;g__Moraxella_A;s__Moraxella_A cinereus	96.59	0.96	GCA_014647715.1	95	d__Bacteria;p__Proteobacteria;c__Gammaproteobacteria;o__Pseudomonadales;f__Moraxellaceae;g__Moraxella_A;s__Moraxella_A cinereus	96.59	0.96	d__Bacteria;p__Proteobacteria;c__Gammaproteobacteria;o__Pseudomonadales;f__Moraxellaceae;g__Moraxella_A;s__	taxonomic classification defined by topology and ANI	topological placement and ANI have congruent species assignments	GCF_009867135.1, s__Moraxella_A sp002478835, 95.0237, 95.5, 0.88; GCF_001553955.1, s__Moraxella_A osloensis, 95.0237, 95.48, 0.92; GCF_001591265.1, s__Moraxella_A atlantae, 95.0, 79.48, 0.29; GCF_000379845.1, s__Moraxella_A boevrei, 95.0, 79.17, 0.24; GCF_000320365.1, s__Moraxella_A macacae, 95.0, 78.67, 0.15	60.21	11	N/A	N/A	SL310959	Subway	Shek Kip Mei	22.332	114.169	Underground	Subway air	Air	Air	NA	NA	NA	06/07 2017	Indoor	NA	NA	NA	NA
SL310960_bin.1	88.5168	6.3483	0.736911	2152344	583	4217	d__Bacteria	Actinobacteriota	Actinomycetia	o__Actinomycetales	f__Micrococcaceae	g__Micrococcus	s__Micrococcus luteus	GCF_000023205.1	95	d__Bacteria;p__Actinobacteriota;c__Actinomycetia;o__Actinomycetales;f__Micrococcaceae;g__Micrococcus;s__Micrococcus luteus	97.13	0.94	GCF_000023205.1	95	d__Bacteria;p__Actinobacteriota;c__Actinomycetia;o__Actinomycetales;f__Micrococcaceae;g__Micrococcus;s__Micrococcus luteus	97.13	0.94	d__Bacteria;p__Actinobacteriota;c__Actinomycetia;o__Actinomycetales;f__Micrococcaceae;g__Micrococcus;s__	taxonomic classification defined by topology and ANI	topological placement and ANI have congruent species assignments	GCF_014205115.1, s__Micrococcus endophyticus, 95.0, 89.49, 0.9; GCF_014204815.1, s__Micrococcus flavus, 95.0, 84.99, 0.86; GCF_001570885.1, s__Micrococcus lylae, 95.0, 83.34, 0.79; GCF_014205175.1, s__Micrococcus cohnii, 95.0, 81.37, 0.67	87.73	11	N/A	N/A	SL310960	Subway	Prince Edward	22.3251	114.168	Underground	Subway air	Air	Air	NA	NA	NA	06/07 2017	Indoor	NA	NA	NA	NA
SL310960_bin.3	77.8257	3.40038	0.441366	1863843	1045	1843	d__Bacteria	Proteobacteria	Gammaproteobacteria	o__Pseudomonadales	f__Moraxellaceae	g__Moraxella_A	s__Moraxella_A cinereus	GCA_014647715.1	95	d__Bacteria;p__Proteobacteria;c__Gammaproteobacteria;o__Pseudomonadales;f__Moraxellaceae;g__Moraxella_A;s__Moraxella_A cinereus	96.51	0.96	N/A	N/A	N/A	N/A	N/A	d__Bacteria;p__Proteobacteria;c__Gammaproteobacteria;o__Pseudomonadales;f__Moraxellaceae;g__Moraxella_A;s__	ANI	topological placement and ANI have incongruent species assignments	GCA_014647715.1, s__Moraxella_A cinereus, 95.0, 96.51, 0.96; GCF_001553955.1, s__Moraxella_A osloensis, 95.0237, 96.06, 0.92; GCF_009867135.1, s__Moraxella_A sp002478835, 95.0237, 95.41, 0.87; GCF_000320365.1, s__Moraxella_A macacae, 95.0, 79.53, 0.21; GCF_000379845.1, s__Moraxella_A boevrei, 95.0, 79.27, 0.32; GCF_001591265.1, s__Moraxella_A atlantae, 95.0, 79.02, 0.37	69.07	11	N/A	N/A	SL310960	Subway	Prince Edward	22.3251	114.168	Underground	Subway air	Air	Air	NA	NA	NA	06/07 2017	Indoor	NA	NA	NA	NA
SL310961_bin.1	68.1546	1.97302	0.738059	1505485	546	2826	d__Bacteria	Actinobacteriota	Actinomycetia	o__Actinomycetales	f__Micrococcaceae	g__Micrococcus	s__Micrococcus luteus	GCF_000023205.1	95	d__Bacteria;p__Actinobacteriota;c__Actinomycetia;o__Actinomycetales;f__Micrococcaceae;g__Micrococcus;s__Micrococcus luteus	97.31	0.98	GCF_000023205.1	95	d__Bacteria;p__Actinobacteriota;c__Actinomycetia;o__Actinomycetales;f__Micrococcaceae;g__Micrococcus;s__Micrococcus luteus	97.31	0.98	d__Bacteria;p__Actinobacteriota;c__Actinomycetia;o__Actinomycetales;f__Micrococcaceae;g__Micrococcus;s__	taxonomic classification defined by topology and ANI	topological placement and ANI have congruent species assignments	GCF_014205115.1, s__Micrococcus endophyticus, 95.0, 89.13, 0.98; GCF_014204815.1, s__Micrococcus flavus, 95.0, 84.37, 0.93; GCF_001570885.1, s__Micrococcus lylae, 95.0, 82.21, 0.83; GCF_014205175.1, s__Micrococcus cohnii, 95.0, 80.84, 0.72	52.29	11	N/A	N/A	SL310961	Subway	Sham Shui Po	22.3313	114.162	Underground	Subway air	Air	Air	NA	NA	NA	06/07 2017	Indoor	NA	NA	NA	NA
SL310961_bin.2	60.1493	1.22925	0.4409	1512798	923	1621	d__Bacteria	Proteobacteria	Gammaproteobacteria	o__Pseudomonadales	f__Moraxellaceae	g__Moraxella_A	s__Moraxella_A cinereus	GCA_014647715.1	95	d__Bacteria;p__Proteobacteria;c__Gammaproteobacteria;o__Pseudomonadales;f__Moraxellaceae;g__Moraxella_A;s__Moraxella_A cinereus	96.24	0.98	N/A	N/A	N/A	N/A	N/A	d__Bacteria;p__Proteobacteria;c__Gammaproteobacteria;o__Pseudomonadales;f__Moraxellaceae;g__Moraxella_A;s__	ANI	topological placement and ANI have incongruent species assignments	GCA_014647715.1, s__Moraxella_A cinereus, 95.0, 96.24, 0.98; GCF_001553955.1, s__Moraxella_A osloensis, 95.0237, 95.71, 0.94; GCF_009867135.1, s__Moraxella_A sp002478835, 95.0237, 95.49, 0.92; GCF_000320365.1, s__Moraxella_A macacae, 95.0, 80.2, 0.21; GCF_000379845.1, s__Moraxella_A boevrei, 95.0, 79.45, 0.29; GCF_001591265.1, s__Moraxella_A atlantae, 95.0, 79.22, 0.25	52.71	11	N/A	N/A	SL310961	Subway	Sham Shui Po	22.3313	114.162	Underground	Subway air	Air	Air	NA	NA	NA	06/07 2017	Indoor	NA	NA	NA	NA
SL310962_bin.1	86.4572	2.2954	0.736524	2017361	566	4076	d__Bacteria	Actinobacteriota	Actinomycetia	o__Actinomycetales	f__Micrococcaceae	g__Micrococcus	s__Micrococcus luteus	GCF_000023205.1	95	d__Bacteria;p__Actinobacteriota;c__Actinomycetia;o__Actinomycetales;f__Micrococcaceae;g__Micrococcus;s__Micrococcus luteus	97.25	0.96	GCF_000023205.1	95	d__Bacteria;p__Actinobacteriota;c__Actinomycetia;o__Actinomycetales;f__Micrococcaceae;g__Micrococcus;s__Micrococcus luteus	97.25	0.96	d__Bacteria;p__Actinobacteriota;c__Actinomycetia;o__Actinomycetales;f__Micrococcaceae;g__Micrococcus;s__	taxonomic classification defined by topology and ANI	topological placement and ANI have congruent species assignments	GCF_014205115.1, s__Micrococcus endophyticus, 95.0, 89.68, 0.94; GCF_014204815.1, s__Micrococcus flavus, 95.0, 84.59, 0.89; GCF_001570885.1, s__Micrococcus lylae, 95.0, 82.75, 0.82; GCF_014205175.1, s__Micrococcus cohnii, 95.0, 81.52, 0.69	80.46	11	N/A	N/A	SL310962	Subway	Cheung Sha Wan	22.3358	114.156	Underground	Subway air	Air	Air	NA	NA	NA	06/07 2017	Indoor	NA	NA	NA	NA
SL310962_bin.3	76.1175	7.36351	0.441029	1915221	1038	1949	d__Bacteria	Proteobacteria	Gammaproteobacteria	o__Pseudomonadales	f__Moraxellaceae	g__Moraxella_A	s__Moraxella_A cinereus	GCA_014647715.1	95	d__Bacteria;p__Proteobacteria;c__Gammaproteobacteria;o__Pseudomonadales;f__Moraxellaceae;g__Moraxella_A;s__Moraxella_A cinereus	96.8	0.99	N/A	N/A	N/A	N/A	N/A	d__Bacteria;p__Proteobacteria;c__Gammaproteobacteria;o__Pseudomonadales;f__Moraxellaceae;g__Moraxella_A;s__	ANI	topological placement and ANI have incongruent species assignments	GCA_014647715.1, s__Moraxella_A cinereus, 95.0, 96.8, 0.99; GCF_009867135.1, s__Moraxella_A sp002478835, 95.0237, 95.87, 0.9; GCF_001553955.1, s__Moraxella_A osloensis, 95.0237, 95.83, 0.92; GCF_001591265.1, s__Moraxella_A atlantae, 95.0, 80.56, 0.3; GCF_000379845.1, s__Moraxella_A boevrei, 95.0, 80.37, 0.19; GCF_000320365.1, s__Moraxella_A macacae, 95.0, 78.96, 0.18	61.17	11	N/A	N/A	SL310962	Subway	Cheung Sha Wan	22.3358	114.156	Underground	Subway air	Air	Air	NA	NA	NA	06/07 2017	Indoor	NA	NA	NA	NA
SL310964_bin.1	93.478	4.50688	0.736235	2230095	565	4545	d__Bacteria	Actinobacteriota	Actinomycetia	o__Actinomycetales	f__Micrococcaceae	g__Micrococcus	s__Micrococcus luteus	GCF_000023205.1	95	d__Bacteria;p__Actinobacteriota;c__Actinomycetia;o__Actinomycetales;f__Micrococcaceae;g__Micrococcus;s__Micrococcus luteus	97.3	0.94	GCF_000023205.1	95	d__Bacteria;p__Actinobacteriota;c__Actinomycetia;o__Actinomycetales;f__Micrococcaceae;g__Micrococcus;s__Micrococcus luteus	97.3	0.94	d__Bacteria;p__Actinobacteriota;c__Actinomycetia;o__Actinomycetales;f__Micrococcaceae;g__Micrococcus;s__	taxonomic classification defined by topology and ANI	topological placement and ANI have congruent species assignments	GCF_014205115.1, s__Micrococcus endophyticus, 95.0, 89.37, 0.93; GCF_014204815.1, s__Micrococcus flavus, 95.0, 84.58, 0.87; GCF_001570885.1, s__Micrococcus lylae, 95.0, 83.0, 0.78; GCF_014205175.1, s__Micrococcus cohnii, 95.0, 81.48, 0.67	92.63	11	N/A	N/A	SL310964	Subway	Tsing Yi	22.3592	114.107	Underground	Subway air	Air	Air	NA	NA	NA	06/07 2017	Indoor	NA	NA	NA	NA
SL310964_bin.2	56.8182	9.60815	0.68181	1856403	635	3075	d__Bacteria	Proteobacteria	Alphaproteobacteria	o__Rhodobacterales	f__Rhodobacteraceae	g__Paracoccus	s__Paracoccus salipaludis	GCF_002287065.1	95	d__Bacteria;p__Proteobacteria;c__Alphaproteobacteria;o__Rhodobacterales;f__Rhodobacteraceae;g__Paracoccus;s__Paracoccus salipaludis	97.56	0.92	GCF_002287065.1	95	d__Bacteria;p__Proteobacteria;c__Alphaproteobacteria;o__Rhodobacterales;f__Rhodobacteraceae;g__Paracoccus;s__Paracoccus salipaludis	97.56	0.92	d__Bacteria;p__Proteobacteria;c__Alphaproteobacteria;o__Rhodobacterales;f__Rhodobacteraceae;g__Paracoccus;s__	taxonomic classification defined by topology and ANI	topological placement and ANI have congruent species assignments	GCF_900102885.1, s__Paracoccus chinensis, 95.0, 90.76, 0.82; GCF_014164625.1, s__Paracoccus sp014164625, 95.0, 87.17, 0.79; GCF_007018965.1, s__Paracoccus marinus, 95.0, 85.05, 0.68; GCF_000763805.1, s__Paracoccus sphaerophysae, 95.0, 84.07, 0.7; GCF_900106665.1, s__Paracoccus sanguinis, 95.0, 83.89, 0.73; GCF_003286075.1, s__Paracoccus endophyticus, 95.0, 83.74, 0.7; GCF_900142875.1, s__Paracocc…	31.51	11	N/A	Genome has more than 21.7% of markers with multiple hits	SL310964	Subway	Tsing Yi	22.3592	114.107	Underground	Subway air	Air	Air	NA	NA	NA	06/07 2017	Indoor	NA	NA	NA	NA
SL310964_bin.3	77.2829	7.51916	0.439679	2086038	1143	1869	d__Bacteria	Proteobacteria	Gammaproteobacteria	o__Pseudomonadales	f__Moraxellaceae	g__Moraxella_A	s__Moraxella_A cinereus	GCA_014647715.1	95	d__Bacteria;p__Proteobacteria;c__Gammaproteobacteria;o__Pseudomonadales;f__Moraxellaceae;g__Moraxella_A;s__Moraxella_A cinereus	96.57	0.95	N/A	N/A	N/A	N/A	N/A	d__Bacteria;p__Proteobacteria;c__Gammaproteobacteria;o__Pseudomonadales;f__Moraxellaceae;g__Moraxella_A;s__	ANI	topological placement and ANI have incongruent species assignments	GCA_014647715.1, s__Moraxella_A cinereus, 95.0, 96.57, 0.95; GCF_001553955.1, s__Moraxella_A osloensis, 95.0237, 95.74, 0.96; GCF_009867135.1, s__Moraxella_A sp002478835, 95.0237, 95.56, 0.88; GCF_001591265.1, s__Moraxella_A atlantae, 95.0, 80.56, 0.27; GCF_000379845.1, s__Moraxella_A boevrei, 95.0, 79.16, 0.26; GCF_000320365.1, s__Moraxella_A macacae, 95.0, 78.71, 0.18	70.64	11	N/A	N/A	SL310964	Subway	Tsing Yi	22.3592	114.107	Underground	Subway air	Air	Air	NA	NA	NA	06/07 2017	Indoor	NA	NA	NA	NA
SL310965_bin.1	54.933	2.58621	0.442986	1202617	494	2441	d__Bacteria	Proteobacteria	Gammaproteobacteria	o__Pseudomonadales	f__Moraxellaceae	g__Moraxella_A	s__Moraxella_A cinereus	GCA_014647715.1	95	d__Bacteria;p__Proteobacteria;c__Gammaproteobacteria;o__Pseudomonadales;f__Moraxellaceae;g__Moraxella_A;s__Moraxella_A cinereus	96.49	0.98	N/A	N/A	N/A	N/A	N/A	d__Bacteria;p__Proteobacteria;c__Gammaproteobacteria;o__Pseudomonadales;f__Moraxellaceae;g__Moraxella_A;s__	ANI	topological placement and ANI have incongruent species assignments	GCA_014647715.1, s__Moraxella_A cinereus, 95.0, 96.49, 0.98; GCF_001553955.1, s__Moraxella_A osloensis, 95.0237, 95.5, 0.94; GCF_009867135.1, s__Moraxella_A sp002478835, 95.0237, 95.42, 0.95; GCF_001591265.1, s__Moraxella_A atlantae, 95.0, 78.54, 0.31; GCF_000379845.1, s__Moraxella_A boevrei, 95.0, 77.63, 0.23; GCF_000320365.1, s__Moraxella_A macacae, 95.0, 76.3, 0.14	37.24	11	N/A	N/A	SL310965	Subway	Yau Tong	22.2987	114.237	Underground	Subway air	Air	Air	NA	NA	NA	07/07 2017	Indoor	NA	NA	NA	NA
SL310965_bin.2	84.3456	2.71407	0.736846	1960164	584	3657	d__Bacteria	Actinobacteriota	Actinomycetia	o__Actinomycetales	f__Micrococcaceae	g__Micrococcus	s__Micrococcus luteus	GCF_000023205.1	95	d__Bacteria;p__Actinobacteriota;c__Actinomycetia;o__Actinomycetales;f__Micrococcaceae;g__Micrococcus;s__Micrococcus luteus	97.38	0.94	GCF_000023205.1	95	d__Bacteria;p__Actinobacteriota;c__Actinomycetia;o__Actinomycetales;f__Micrococcaceae;g__Micrococcus;s__Micrococcus luteus	97.38	0.94	d__Bacteria;p__Actinobacteriota;c__Actinomycetia;o__Actinomycetales;f__Micrococcaceae;g__Micrococcus;s__	taxonomic classification defined by topology and ANI	topological placement and ANI have congruent species assignments	GCF_014205115.1, s__Micrococcus endophyticus, 95.0, 89.46, 0.93; GCF_014204815.1, s__Micrococcus flavus, 95.0, 84.42, 0.89; GCF_001570885.1, s__Micrococcus lylae, 95.0, 82.91, 0.81; GCF_014205175.1, s__Micrococcus cohnii, 95.0, 81.22, 0.7	79.81	11	N/A	N/A	SL310965	Subway	Yau Tong	22.2987	114.237	Underground	Subway air	Air	Air	NA	NA	NA	07/07 2017	Indoor	NA	NA	NA	NA
SL310966_bin.1	87.0662	5.35441	0.739005	2098505	565	4319	d__Bacteria	Actinobacteriota	Actinomycetia	o__Actinomycetales	f__Micrococcaceae	g__Micrococcus	s__Micrococcus luteus	GCF_000023205.1	95	d__Bacteria;p__Actinobacteriota;c__Actinomycetia;o__Actinomycetales;f__Micrococcaceae;g__Micrococcus;s__Micrococcus luteus	97.37	0.97	GCF_000023205.1	95	d__Bacteria;p__Actinobacteriota;c__Actinomycetia;o__Actinomycetales;f__Micrococcaceae;g__Micrococcus;s__Micrococcus luteus	97.37	0.97	d__Bacteria;p__Actinobacteriota;c__Actinomycetia;o__Actinomycetales;f__Micrococcaceae;g__Micrococcus;s__	taxonomic classification defined by topology and ANI	topological placement and ANI have congruent species assignments	GCF_014205115.1, s__Micrococcus endophyticus, 95.0, 89.38, 0.95; GCF_014204815.1, s__Micrococcus flavus, 95.0, 84.32, 0.89; GCF_001570885.1, s__Micrococcus lylae, 95.0, 82.92, 0.79; GCF_014205175.1, s__Micrococcus cohnii, 95.0, 81.04, 0.66	79.69	11	N/A	N/A	SL310966	Subway	Quarry Bay	22.2884	114.21	Underground	Subway air	Air	Air	NA	NA	NA	07/07 2017	Indoor	NA	NA	NA	NA
SL310966_bin.3	50.3448	1.72414	0.705945	1892065	526	4073	d__Bacteria	Proteobacteria	Alphaproteobacteria	o__Rhodobacterales	f__Rhodobacteraceae	g__Paracoccus	s__Paracoccus salipaludis	GCF_002287065.1	95	d__Bacteria;p__Proteobacteria;c__Alphaproteobacteria;o__Rhodobacterales;f__Rhodobacteraceae;g__Paracoccus;s__Paracoccus salipaludis	98.89	0.97	GCF_002287065.1	95	d__Bacteria;p__Proteobacteria;c__Alphaproteobacteria;o__Rhodobacterales;f__Rhodobacteraceae;g__Paracoccus;s__Paracoccus salipaludis	98.89	0.97	d__Bacteria;p__Proteobacteria;c__Alphaproteobacteria;o__Rhodobacterales;f__Rhodobacteraceae;g__Paracoccus;s__	taxonomic classification defined by topology and ANI	topological placement and ANI have congruent species assignments	GCF_900102885.1, s__Paracoccus chinensis, 95.0, 91.01, 0.92; GCF_014164625.1, s__Paracoccus sp014164625, 95.0, 86.7, 0.82; GCF_000763805.1, s__Paracoccus sphaerophysae, 95.0, 82.85, 0.77; GCF_900142875.1, s__Paracoccus solventivorans, 95.0, 82.85, 0.74; GCF_900106665.1, s__Paracoccus sanguinis, 95.0, 82.64, 0.77; GCF_003286075.1, s__Paracoccus endophyticus, 95.0, 82.24, 0.8; GCF_004522155.1, s__P…	33.23	11	N/A	N/A	SL310966	Subway	Quarry Bay	22.2884	114.21	Underground	Subway air	Air	Air	NA	NA	NA	07/07 2017	Indoor	NA	NA	NA	NA
SL310966_bin.4	57.4713	6.03448	0.707952	2021827	853	2675	d__Bacteria	Proteobacteria	Alphaproteobacteria	o__Rhodobacterales	f__Rhodobacteraceae	g__Paracoccus	s__Paracoccus marinus	GCF_007018965.1	95	d__Bacteria;p__Proteobacteria;c__Alphaproteobacteria;o__Rhodobacterales;f__Rhodobacteraceae;g__Paracoccus;s__Paracoccus marinus	97.2	0.99	GCF_007018965.1	95	d__Bacteria;p__Proteobacteria;c__Alphaproteobacteria;o__Rhodobacterales;f__Rhodobacteraceae;g__Paracoccus;s__Paracoccus marinus	97.2	0.99	d__Bacteria;p__Proteobacteria;c__Alphaproteobacteria;o__Rhodobacterales;f__Rhodobacteraceae;g__Paracoccus;s__	taxonomic classification defined by topology and ANI	topological placement and ANI have congruent species assignments	GCF_004923205.2, s__Paracoccus aeridis, 95.0, 87.8, 0.93; GCF_004522155.1, s__Paracoccus luteus, 95.0, 81.15, 0.76; GCF_900106665.1, s__Paracoccus sanguinis, 95.0, 80.95, 0.75; GCF_003286075.1, s__Paracoccus endophyticus, 95.0, 80.87, 0.75; GCF_000763805.1, s__Paracoccus sphaerophysae, 95.0, 80.86, 0.71; GCF_002287065.1, s__Paracoccus salipaludis, 95.0, 80.82, 0.75; GCF_900102885.1, s__Paracoccus…	37.48	11	N/A	N/A	SL310966	Subway	Quarry Bay	22.2884	114.21	Underground	Subway air	Air	Air	NA	NA	NA	07/07 2017	Indoor	NA	NA	NA	NA
SL310966_bin.5	63.1865	1.90374	0.440079	1437088	548	2630	d__Bacteria	Proteobacteria	Gammaproteobacteria	o__Pseudomonadales	f__Moraxellaceae	g__Moraxella_A	s__Moraxella_A cinereus	GCA_014647715.1	95	d__Bacteria;p__Proteobacteria;c__Gammaproteobacteria;o__Pseudomonadales;f__Moraxellaceae;g__Moraxella_A;s__Moraxella_A cinereus	96.69	0.93	N/A	N/A	N/A	N/A	N/A	d__Bacteria;p__Proteobacteria;c__Gammaproteobacteria;o__Pseudomonadales;f__Moraxellaceae;g__Moraxella_A;s__	ANI	topological placement and ANI have incongruent species assignments	GCA_014647715.1, s__Moraxella_A cinereus, 95.0, 96.69, 0.93; GCF_001553955.1, s__Moraxella_A osloensis, 95.0237, 95.69, 0.93; GCF_009867135.1, s__Moraxella_A sp002478835, 95.0237, 95.0, 0.93; GCF_000379845.1, s__Moraxella_A boevrei, 95.0, 79.81, 0.18; GCF_000320365.1, s__Moraxella_A macacae, 95.0, 78.68, 0.2; GCF_001591265.1, s__Moraxella_A atlantae, 95.0, 78.6, 0.25	62.4	11	N/A	N/A	SL310966	Subway	Quarry Bay	22.2884	114.21	Underground	Subway air	Air	Air	NA	NA	NA	07/07 2017	Indoor	NA	NA	NA	NA
SL310967_bin.1	64.4516	1.66028	0.442537	1301758	828	1557	d__Bacteria	Proteobacteria	Gammaproteobacteria	o__Pseudomonadales	f__Moraxellaceae	g__Moraxella_A	s__Moraxella_A cinereus	GCA_014647715.1	95	d__Bacteria;p__Proteobacteria;c__Gammaproteobacteria;o__Pseudomonadales;f__Moraxellaceae;g__Moraxella_A;s__Moraxella_A cinereus	96.8	0.97	GCA_014647715.1	95	d__Bacteria;p__Proteobacteria;c__Gammaproteobacteria;o__Pseudomonadales;f__Moraxellaceae;g__Moraxella_A;s__Moraxella_A cinereus	96.8	0.97	d__Bacteria;p__Proteobacteria;c__Gammaproteobacteria;o__Pseudomonadales;f__Moraxellaceae;g__Moraxella_A;s__	taxonomic classification defined by topology and ANI	topological placement and ANI have congruent species assignments	GCF_001553955.1, s__Moraxella_A osloensis, 95.0237, 96.2, 0.92; GCF_009867135.1, s__Moraxella_A sp002478835, 95.0237, 96.14, 0.89; GCF_001591265.1, s__Moraxella_A atlantae, 95.0, 82.22, 0.37; GCF_000320365.1, s__Moraxella_A macacae, 95.0, 81.12, 0.26; GCF_000379845.1, s__Moraxella_A boevrei, 95.0, 81.06, 0.37	53.21	11	N/A	N/A	SL310967	Subway	North Point	22.2914	114.2	Underground	Subway air	Air	Air	NA	NA	NA	07/07 2017	Indoor	NA	NA	NA	NA
SL310967_bin.2	52.4521	2.19801	0.736649	1100126	712	1561	d__Bacteria	Actinobacteriota	Actinomycetia	o__Actinomycetales	f__Micrococcaceae	g__Micrococcus	s__Micrococcus luteus	GCF_000023205.1	95	d__Bacteria;p__Actinobacteriota;c__Actinomycetia;o__Actinomycetales;f__Micrococcaceae;g__Micrococcus;s__Micrococcus luteus	97.23	0.94	GCF_000023205.1	95	d__Bacteria;p__Actinobacteriota;c__Actinomycetia;o__Actinomycetales;f__Micrococcaceae;g__Micrococcus;s__Micrococcus luteus	97.23	0.94	d__Bacteria;p__Actinobacteriota;c__Actinomycetia;o__Actinomycetales;f__Micrococcaceae;g__Micrococcus;s__	taxonomic classification defined by topology and ANI	topological placement and ANI have congruent species assignments	GCF_014205115.1, s__Micrococcus endophyticus, 95.0, 89.86, 0.94; GCF_014204815.1, s__Micrococcus flavus, 95.0, 84.15, 0.88; GCF_001570885.1, s__Micrococcus lylae, 95.0, 82.81, 0.88; GCF_014205175.1, s__Micrococcus cohnii, 95.0, 81.82, 0.69	40.78	11	N/A	N/A	SL310967	Subway	North Point	22.2914	114.2	Underground	Subway air	Air	Air	NA	NA	NA	07/07 2017	Indoor	NA	NA	NA	NA
SL310968_bin.1	73.0545	3.91437	0.738428	1724695	883	2057	d__Bacteria	Actinobacteriota	Actinomycetia	o__Actinomycetales	f__Micrococcaceae	g__Micrococcus	s__Micrococcus luteus	GCF_000023205.1	95	d__Bacteria;p__Actinobacteriota;c__Actinomycetia;o__Actinomycetales;f__Micrococcaceae;g__Micrococcus;s__Micrococcus luteus	97.52	0.99	GCF_000023205.1	95	d__Bacteria;p__Actinobacteriota;c__Actinomycetia;o__Actinomycetales;f__Micrococcaceae;g__Micrococcus;s__Micrococcus luteus	97.52	0.99	d__Bacteria;p__Actinobacteriota;c__Actinomycetia;o__Actinomycetales;f__Micrococcaceae;g__Micrococcus;s__	taxonomic classification defined by topology and ANI	topological placement and ANI have congruent species assignments	GCF_014205115.1, s__Micrococcus endophyticus, 95.0, 90.02, 0.98; GCF_014204815.1, s__Micrococcus flavus, 95.0, 84.29, 0.94; GCF_001570885.1, s__Micrococcus lylae, 95.0, 82.56, 0.86; GCF_014205175.1, s__Micrococcus cohnii, 95.0, 81.41, 0.7	62.34	11	N/A	N/A	SL310968	Subway	Fortress Hill	22.2885	114.194	Underground	Subway air	Air	Air	NA	NA	NA	07/07 2017	Indoor	NA	NA	NA	NA
SL310968_bin.2	68.7859	1.98356	0.44218	1560161	929	1708	d__Bacteria	Proteobacteria	Gammaproteobacteria	o__Pseudomonadales	f__Moraxellaceae	g__Moraxella_A	s__Moraxella_A cinereus	GCA_014647715.1	95	d__Bacteria;p__Proteobacteria;c__Gammaproteobacteria;o__Pseudomonadales;f__Moraxellaceae;g__Moraxella_A;s__Moraxella_A cinereus	96.81	0.96	GCA_014647715.1	95	d__Bacteria;p__Proteobacteria;c__Gammaproteobacteria;o__Pseudomonadales;f__Moraxellaceae;g__Moraxella_A;s__Moraxella_A cinereus	96.81	0.96	d__Bacteria;p__Proteobacteria;c__Gammaproteobacteria;o__Pseudomonadales;f__Moraxellaceae;g__Moraxella_A;s__	taxonomic classification defined by topology and ANI	topological placement and ANI have congruent species assignments	GCF_009867135.1, s__Moraxella_A sp002478835, 95.0237, 95.9, 0.82; GCF_001553955.1, s__Moraxella_A osloensis, 95.0237, 95.6, 0.92; GCF_001591265.1, s__Moraxella_A atlantae, 95.0, 80.78, 0.34; GCF_000320365.1, s__Moraxella_A macacae, 95.0, 79.19, 0.18; GCF_000379845.1, s__Moraxella_A boevrei, 95.0, 77.46, 0.26	65.55	11	N/A	N/A	SL310968	Subway	Fortress Hill	22.2885	114.194	Underground	Subway air	Air	Air	NA	NA	NA	07/07 2017	Indoor	NA	NA	NA	NA
SL310969_bin.1	72.781	5.76309	0.443208	1932749	1066	1865	d__Bacteria	Proteobacteria	Gammaproteobacteria	o__Pseudomonadales	f__Moraxellaceae	g__Moraxella_A	s__Moraxella_A cinereus	GCA_014647715.1	95	d__Bacteria;p__Proteobacteria;c__Gammaproteobacteria;o__Pseudomonadales;f__Moraxellaceae;g__Moraxella_A;s__Moraxella_A cinereus	96.82	0.99	N/A	N/A	N/A	N/A	N/A	d__Bacteria;p__Proteobacteria;c__Gammaproteobacteria;o__Pseudomonadales;f__Moraxellaceae;g__Moraxella_A;s__	ANI	topological placement and ANI have incongruent species assignments	GCA_014647715.1, s__Moraxella_A cinereus, 95.0, 96.82, 0.99; GCF_001553955.1, s__Moraxella_A osloensis, 95.0237, 95.8, 0.96; GCF_009867135.1, s__Moraxella_A sp002478835, 95.0237, 95.71, 0.94; GCF_001591265.1, s__Moraxella_A atlantae, 95.0, 80.02, 0.29; GCF_000320365.1, s__Moraxella_A macacae, 95.0, 79.83, 0.2; GCF_000379845.1, s__Moraxella_A boevrei, 95.0, 78.74, 0.31	66.83	11	N/A	N/A	SL310969	Subway	Ocean Park	22.2491	114.175	Aboveground	Subway air	Air	Air	NA	NA	NA	07/07 2017	Outdoor	NA	NA	NA	NA
SL310969_bin.2	60.1702	1.2895	0.73734	1385402	731	1963	d__Bacteria	Actinobacteriota	Actinomycetia	o__Actinomycetales	f__Micrococcaceae	g__Micrococcus	s__Micrococcus luteus	GCF_000023205.1	95	d__Bacteria;p__Actinobacteriota;c__Actinomycetia;o__Actinomycetales;f__Micrococcaceae;g__Micrococcus;s__Micrococcus luteus	97.87	0.97	GCF_000023205.1	95	d__Bacteria;p__Actinobacteriota;c__Actinomycetia;o__Actinomycetales;f__Micrococcaceae;g__Micrococcus;s__Micrococcus luteus	97.87	0.97	d__Bacteria;p__Actinobacteriota;c__Actinomycetia;o__Actinomycetales;f__Micrococcaceae;g__Micrococcus;s__	taxonomic classification defined by topology and ANI	topological placement and ANI have congruent species assignments	GCF_014205115.1, s__Micrococcus endophyticus, 95.0, 90.34, 0.96; GCF_014204815.1, s__Micrococcus flavus, 95.0, 84.72, 0.97; GCF_001570885.1, s__Micrococcus lylae, 95.0, 83.48, 0.84; GCF_014205175.1, s__Micrococcus cohnii, 95.0, 81.6, 0.72	48.74	11	N/A	N/A	SL310969	Subway	Ocean Park	22.2491	114.175	Aboveground	Subway air	Air	Air	NA	NA	NA	07/07 2017	Outdoor	NA	NA	NA	NA
SL310969_bin.3	52.8874	4.51396	0.663382	2867337	1738	1640	d__Bacteria	Proteobacteria	Alphaproteobacteria	o__Rhizobiales	f__Xanthobacteraceae	g__Tardiphaga	s__	N/A	N/A	N/A	N/A	N/A	N/A	N/A	N/A	N/A	N/A	d__Bacteria;p__Proteobacteria;c__Alphaproteobacteria;o__Rhizobiales;f__Xanthobacteraceae;g__;s__	taxonomic novelty determined using RED	N/A	N/A	36.05	11	0.957564	N/A	SL310969	Subway	Ocean Park	22.2491	114.175	Aboveground	Subway air	Air	Air	NA	NA	NA	07/07 2017	Outdoor	NA	NA	NA	NA
SL310969_bin.4	89.0759	4.90777	0.66187	3957511	1358	3519	d__Bacteria	Proteobacteria	Gammaproteobacteria	o__Burkholderiales	f__Burkholderiaceae	g__Aquabacterium	s__	N/A	N/A	N/A	N/A	N/A	GCA_002339015.1	95	d__Bacteria;p__Proteobacteria;c__Gammaproteobacteria;o__Burkholderiales;f__Burkholderiaceae;g__Aquabacterium;s__Aquabacterium sp002339015	90.76	0.8	d__Bacteria;p__Proteobacteria;c__Gammaproteobacteria;o__Burkholderiales;f__Burkholderiaceae;g__Aquabacterium;s__	taxonomic classification defined by topology and ANI	N/A	GCF_003933735.1, s__Aquabacterium sp003933735, 95.0, 88.09, 0.88; GCA_001770725.1, s__Aquabacterium sp001770725, 95.0, 82.42, 0.56; GCF_005502875.1, s__Aquabacterium sp005502875, 95.0, 82.0, 0.52; GCF_004310865.1, s__Aquabacterium sp004310865, 95.0, 82.0, 0.53; GCF_004362855.1, s__Aquabacterium commune, 95.0, 81.96, 0.54; GCF_001447195.1, s__Aquabacterium parvum, 95.0, 81.96, 0.53; GCF_000768065.…	69.39	11	0.994737	Genome not assigned to closest species as it falls outside its pre-defined ANI radius	SL310969	Subway	Ocean Park	22.2491	114.175	Aboveground	Subway air	Air	Air	NA	NA	NA	07/07 2017	Outdoor	NA	NA	NA	NA
SL310970_bin.1	65.5172	5.17241	0.740217	1977791	930	2259	d__Bacteria	Actinobacteriota	Actinomycetia	o__Actinomycetales	f__Micrococcaceae	g__Micrococcus	s__Micrococcus luteus	GCF_000023205.1	95	d__Bacteria;p__Actinobacteriota;c__Actinomycetia;o__Actinomycetales;f__Micrococcaceae;g__Micrococcus;s__Micrococcus luteus	97.12	0.9	GCF_000023205.1	95	d__Bacteria;p__Actinobacteriota;c__Actinomycetia;o__Actinomycetales;f__Micrococcaceae;g__Micrococcus;s__Micrococcus luteus	97.12	0.9	d__Bacteria;p__Actinobacteriota;c__Actinomycetia;o__Actinomycetales;f__Micrococcaceae;g__Micrococcus;s__	taxonomic classification defined by topology and ANI	topological placement and ANI have congruent species assignments	GCF_014205115.1, s__Micrococcus endophyticus, 95.0, 89.24, 0.87; GCF_014204815.1, s__Micrococcus flavus, 95.0, 85.05, 0.86; GCF_001570885.1, s__Micrococcus lylae, 95.0, 83.68, 0.75; GCF_014205175.1, s__Micrococcus cohnii, 95.0, 81.35, 0.65	56.3	11	N/A	N/A	SL310970	Subway	Admiralty	22.2797	114.165	Underground	Subway air	Air	Air	NA	NA	NA	07/07 2017	Indoor	NA	NA	NA	NA
SL310970_bin.3	84.3391	9.98164	0.43847	2456173	1317	1956	d__Bacteria	Proteobacteria	Gammaproteobacteria	o__Pseudomonadales	f__Moraxellaceae	g__Moraxella_A	s__Moraxella_A cinereus	GCA_014647715.1	95	d__Bacteria;p__Proteobacteria;c__Gammaproteobacteria;o__Pseudomonadales;f__Moraxellaceae;g__Moraxella_A;s__Moraxella_A cinereus	96.5	0.93	N/A	N/A	N/A	N/A	N/A	d__Bacteria;p__Proteobacteria;c__Gammaproteobacteria;o__Pseudomonadales;f__Moraxellaceae;g__Moraxella_A;s__	ANI	topological placement and ANI have incongruent species assignments	GCA_014647715.1, s__Moraxella_A cinereus, 95.0, 96.5, 0.93; GCF_009867135.1, s__Moraxella_A sp002478835, 95.0237, 95.1, 0.84; GCF_001553955.1, s__Moraxella_A osloensis, 95.0237, 94.98, 0.89; GCF_001591265.1, s__Moraxella_A atlantae, 95.0, 80.06, 0.21; GCF_000379845.1, s__Moraxella_A boevrei, 95.0, 79.08, 0.18; GCF_000320365.1, s__Moraxella_A macacae, 95.0, 78.91, 0.16	69.96	11	N/A	N/A	SL310970	Subway	Admiralty	22.2797	114.165	Underground	Subway air	Air	Air	NA	NA	NA	07/07 2017	Indoor	NA	NA	NA	NA
SL310970_bin.4	76.1415	4.25913	0.695151	2900370	740	4561	d__Bacteria	Proteobacteria	Alphaproteobacteria	o__Rhodobacterales	f__Rhodobacteraceae	g__Paracoccus	s__Paracoccus salipaludis	GCF_002287065.1	95	d__Bacteria;p__Proteobacteria;c__Alphaproteobacteria;o__Rhodobacterales;f__Rhodobacteraceae;g__Paracoccus;s__Paracoccus salipaludis	98.55	0.96	GCF_002287065.1	95	d__Bacteria;p__Proteobacteria;c__Alphaproteobacteria;o__Rhodobacterales;f__Rhodobacteraceae;g__Paracoccus;s__Paracoccus salipaludis	98.55	0.96	d__Bacteria;p__Proteobacteria;c__Alphaproteobacteria;o__Rhodobacterales;f__Rhodobacteraceae;g__Paracoccus;s__	taxonomic classification defined by topology and ANI	topological placement and ANI have congruent species assignments	GCF_900102885.1, s__Paracoccus chinensis, 95.0, 91.05, 0.86; GCF_014164625.1, s__Paracoccus sp014164625, 95.0, 87.01, 0.77; GCF_000763805.1, s__Paracoccus sphaerophysae, 95.0, 83.43, 0.73; GCF_900106665.1, s__Paracoccus sanguinis, 95.0, 83.41, 0.73; GCF_900142875.1, s__Paracoccus solventivorans, 95.0, 83.33, 0.68; GCF_003286075.1, s__Paracoccus endophyticus, 95.0, 83.11, 0.7; GCF_004522155.1, s__…	55.43	11	N/A	N/A	SL310970	Subway	Admiralty	22.2797	114.165	Underground	Subway air	Air	Air	NA	NA	NA	07/07 2017	Indoor	NA	NA	NA	NA
SL310970_bin.5	57.6996	8.04446	0.703618	1840597	599	3281	d__Bacteria	Proteobacteria	Alphaproteobacteria	o__Rhodobacterales	f__Rhodobacteraceae	g__Paracoccus	s__Paracoccus marinus	GCF_007018965.1	95	d__Bacteria;p__Proteobacteria;c__Alphaproteobacteria;o__Rhodobacterales;f__Rhodobacteraceae;g__Paracoccus;s__Paracoccus marinus	96.64	0.94	GCF_007018965.1	95	d__Bacteria;p__Proteobacteria;c__Alphaproteobacteria;o__Rhodobacterales;f__Rhodobacteraceae;g__Paracoccus;s__Paracoccus marinus	96.64	0.94	d__Bacteria;p__Proteobacteria;c__Alphaproteobacteria;o__Rhodobacterales;f__Rhodobacteraceae;g__Paracoccus;s__	taxonomic classification defined by topology and ANI	topological placement and ANI have congruent species assignments	GCF_004923205.2, s__Paracoccus aeridis, 95.0, 87.1, 0.86; GCF_002287065.1, s__Paracoccus salipaludis, 95.0, 82.91, 0.71; GCF_900102885.1, s__Paracoccus chinensis, 95.0, 81.77, 0.66; GCF_004522155.1, s__Paracoccus luteus, 95.0, 81.16, 0.67; GCF_000763805.1, s__Paracoccus sphaerophysae, 95.0, 81.1, 0.67; GCF_900106665.1, s__Paracoccus sanguinis, 95.0, 80.98, 0.65; GCF_014164625.1, s__Paracoccus sp0…	36.99	11	N/A	N/A	SL310970	Subway	Admiralty	22.2797	114.165	Underground	Subway air	Air	Air	NA	NA	NA	07/07 2017	Indoor	NA	NA	NA	NA
SL310972_bin.1	64.7031	2.47446	0.439486	1532527	597	2538	d__Bacteria	Proteobacteria	Gammaproteobacteria	o__Pseudomonadales	f__Moraxellaceae	g__Moraxella_A	s__Moraxella_A cinereus	GCA_014647715.1	95	d__Bacteria;p__Proteobacteria;c__Gammaproteobacteria;o__Pseudomonadales;f__Moraxellaceae;g__Moraxella_A;s__Moraxella_A cinereus	96.36	0.94	GCF_001553955.1	95.0237	d__Bacteria;p__Proteobacteria;c__Gammaproteobacteria;o__Pseudomonadales;f__Moraxellaceae;g__Moraxella_A;s__Moraxella_A osloensis	95.4	0.92	d__Bacteria;p__Proteobacteria;c__Gammaproteobacteria;o__Pseudomonadales;f__Moraxellaceae;g__Moraxella_A;s__	ANI	topological placement and ANI have incongruent species assignments	GCF_009867135.1, s__Moraxella_A sp002478835, 95.0237, 94.69, 0.9; GCF_001591265.1, s__Moraxella_A atlantae, 95.0, 78.14, 0.22; GCF_000379845.1, s__Moraxella_A boevrei, 95.0, 77.2, 0.16; GCF_000320365.1, s__Moraxella_A macacae, 95.0, 76.97, 0.17	43.62	11	N/A	N/A	SL310972	Subway	East Tsim Sha Tsui	22.2953	114.174	Underground	Subway air	Air	Air	NA	NA	NA	07/07 2017	Indoor	NA	NA	NA	NA
SL310972_bin.3	74.1801	3.44037	0.737404	1677907	831	2184	d__Bacteria	Actinobacteriota	Actinomycetia	o__Actinomycetales	f__Micrococcaceae	g__Micrococcus	s__Micrococcus luteus	GCF_000023205.1	95	d__Bacteria;p__Actinobacteriota;c__Actinomycetia;o__Actinomycetales;f__Micrococcaceae;g__Micrococcus;s__Micrococcus luteus	96.72	0.99	GCF_000023205.1	95	d__Bacteria;p__Actinobacteriota;c__Actinomycetia;o__Actinomycetales;f__Micrococcaceae;g__Micrococcus;s__Micrococcus luteus	96.72	0.99	d__Bacteria;p__Actinobacteriota;c__Actinomycetia;o__Actinomycetales;f__Micrococcaceae;g__Micrococcus;s__	taxonomic classification defined by topology and ANI	topological placement and ANI have congruent species assignments	GCF_014205115.1, s__Micrococcus endophyticus, 95.0, 89.53, 0.98; GCF_014204815.1, s__Micrococcus flavus, 95.0, 84.57, 0.9; GCF_001570885.1, s__Micrococcus lylae, 95.0, 82.74, 0.86; GCF_014205175.1, s__Micrococcus cohnii, 95.0, 81.02, 0.7	62.38	11	N/A	N/A	SL310972	Subway	East Tsim Sha Tsui	22.2953	114.174	Underground	Subway air	Air	Air	NA	NA	NA	07/07 2017	Indoor	NA	NA	NA	NA
SL310973_bin.1	74.0389	2.0715	0.734589	1694260	373	5103	d__Bacteria	Actinobacteriota	Actinomycetia	o__Actinomycetales	f__Micrococcaceae	g__Micrococcus	s__Micrococcus luteus	GCF_000023205.1	95	d__Bacteria;p__Actinobacteriota;c__Actinomycetia;o__Actinomycetales;f__Micrococcaceae;g__Micrococcus;s__Micrococcus luteus	97.13	0.91	GCF_000023205.1	95	d__Bacteria;p__Actinobacteriota;c__Actinomycetia;o__Actinomycetales;f__Micrococcaceae;g__Micrococcus;s__Micrococcus luteus	97.13	0.91	d__Bacteria;p__Actinobacteriota;c__Actinomycetia;o__Actinomycetales;f__Micrococcaceae;g__Micrococcus;s__	taxonomic classification defined by topology and ANI	topological placement and ANI have congruent species assignments	GCF_014205115.1, s__Micrococcus endophyticus, 95.0, 89.09, 0.92; GCF_014204815.1, s__Micrococcus flavus, 95.0, 84.66, 0.85; GCF_001570885.1, s__Micrococcus lylae, 95.0, 83.12, 0.78; GCF_014205175.1, s__Micrococcus cohnii, 95.0, 81.4, 0.66	75.38	11	N/A	N/A	SL310973	Subway	Hung Hom	22.3036	114.181	Aboveground	Subway air	Air	Air	NA	NA	NA	07/07 2017	Indoor	NA	NA	NA	NA
SL310973_bin.2	72.7929	2.12324	0.441663	1731574	973	1843	d__Bacteria	Proteobacteria	Gammaproteobacteria	o__Pseudomonadales	f__Moraxellaceae	g__Moraxella_A	s__Moraxella_A cinereus	GCA_014647715.1	95	d__Bacteria;p__Proteobacteria;c__Gammaproteobacteria;o__Pseudomonadales;f__Moraxellaceae;g__Moraxella_A;s__Moraxella_A cinereus	96.5	0.96	N/A	N/A	N/A	N/A	N/A	d__Bacteria;p__Proteobacteria;c__Gammaproteobacteria;o__Pseudomonadales;f__Moraxellaceae;g__Moraxella_A;s__	ANI	topological placement and ANI have incongruent species assignments	GCA_014647715.1, s__Moraxella_A cinereus, 95.0, 96.5, 0.96; GCF_001553955.1, s__Moraxella_A osloensis, 95.0237, 95.58, 0.92; GCF_009867135.1, s__Moraxella_A sp002478835, 95.0237, 95.02, 0.91; GCF_000379845.1, s__Moraxella_A boevrei, 95.0, 79.64, 0.32; GCF_001591265.1, s__Moraxella_A atlantae, 95.0, 79.21, 0.35; GCF_000320365.1, s__Moraxella_A macacae, 95.0, 78.83, 0.29	66.07	11	N/A	N/A	SL310973	Subway	Hung Hom	22.3036	114.181	Aboveground	Subway air	Air	Air	NA	NA	NA	07/07 2017	Indoor	NA	NA	NA	NA
SL310973_bin.3	63.0746	7.92793	0.690568	2116904	1203	1772	d__Bacteria	Actinobacteriota	Actinomycetia	o__Actinomycetales	f__Dermatophilaceae	g__Dermacoccus	s__Dermacoccus abyssi	GCF_003515945.1	95	d__Bacteria;p__Actinobacteriota;c__Actinomycetia;o__Actinomycetales;f__Dermatophilaceae;g__Dermacoccus;s__Dermacoccus abyssi	97.21	0.94	GCF_003515945.1	95	d__Bacteria;p__Actinobacteriota;c__Actinomycetia;o__Actinomycetales;f__Dermatophilaceae;g__Dermacoccus;s__Dermacoccus abyssi	97.21	0.94	d__Bacteria;p__Actinobacteriota;c__Actinomycetia;o__Actinomycetales;f__Dermatophilaceae;g__Dermacoccus;s__	taxonomic classification defined by topology and ANI	topological placement and ANI have congruent species assignments	GCF_900447535.1, s__Dermacoccus nishinomiyaensis, 95.0, 84.66, 0.86	43.78	11	N/A	N/A	SL310973	Subway	Hung Hom	22.3036	114.181	Aboveground	Subway air	Air	Air	NA	NA	NA	07/07 2017	Indoor	NA	NA	NA	NA
SL310974_bin.1	85.7759	5.28815	0.439658	2210531	1129	2104	d__Bacteria	Proteobacteria	Gammaproteobacteria	o__Pseudomonadales	f__Moraxellaceae	g__Moraxella_A	s__Moraxella_A cinereus	GCA_014647715.1	95	d__Bacteria;p__Proteobacteria;c__Gammaproteobacteria;o__Pseudomonadales;f__Moraxellaceae;g__Moraxella_A;s__Moraxella_A cinereus	96.45	0.95	N/A	N/A	N/A	N/A	N/A	d__Bacteria;p__Proteobacteria;c__Gammaproteobacteria;o__Pseudomonadales;f__Moraxellaceae;g__Moraxella_A;s__	ANI	topological placement and ANI have incongruent species assignments	GCA_014647715.1, s__Moraxella_A cinereus, 95.0, 96.45, 0.95; GCF_001553955.1, s__Moraxella_A osloensis, 95.0237, 95.97, 0.94; GCF_009867135.1, s__Moraxella_A sp002478835, 95.0237, 95.62, 0.88; GCF_000379845.1, s__Moraxella_A boevrei, 95.0, 79.43, 0.18; GCF_001591265.1, s__Moraxella_A atlantae, 95.0, 78.95, 0.27; GCF_000320365.1, s__Moraxella_A macacae, 95.0, 78.4, 0.15	73.99	11	N/A	N/A	SL310974	Subway	Mong Kok East	22.3226	114.172	Aboveground	Subway air	Air	Air	NA	NA	NA	07/07 2017	Indoor	NA	NA	NA	NA
SL310974_bin.4	69.5925	8.64681	0.697481	2111127	466	5055	d__Bacteria	Proteobacteria	Alphaproteobacteria	o__Rhodobacterales	f__Rhodobacteraceae	g__Paracoccus	s__Paracoccus marinus	GCF_007018965.1	95	d__Bacteria;p__Proteobacteria;c__Alphaproteobacteria;o__Rhodobacterales;f__Rhodobacteraceae;g__Paracoccus;s__Paracoccus marinus	97.03	0.96	GCF_007018965.1	95	d__Bacteria;p__Proteobacteria;c__Alphaproteobacteria;o__Rhodobacterales;f__Rhodobacteraceae;g__Paracoccus;s__Paracoccus marinus	97.03	0.96	d__Bacteria;p__Proteobacteria;c__Alphaproteobacteria;o__Rhodobacterales;f__Rhodobacteraceae;g__Paracoccus;s__	taxonomic classification defined by topology and ANI	topological placement and ANI have congruent species assignments	GCF_004923205.2, s__Paracoccus aeridis, 95.0, 88.08, 0.91; GCF_002287065.1, s__Paracoccus salipaludis, 95.0, 82.49, 0.69; GCF_004522155.1, s__Paracoccus luteus, 95.0, 82.44, 0.75; GCF_000763805.1, s__Paracoccus sphaerophysae, 95.0, 82.02, 0.71; GCF_900102885.1, s__Paracoccus chinensis, 95.0, 81.97, 0.72; GCF_003286075.1, s__Paracoccus endophyticus, 95.0, 81.96, 0.72; GCF_900106665.1, s__Paracoccu…	54.12	11	N/A	Genome has more than 11.7% of markers with multiple hits	SL310974	Subway	Mong Kok East	22.3226	114.172	Aboveground	Subway air	Air	Air	NA	NA	NA	07/07 2017	Indoor	NA	NA	NA	NA
SL310974_bin.5	54.5843	6.28571	0.690369	1803581	736	2463	d__Bacteria	Actinobacteriota	Actinomycetia	o__Actinomycetales	f__Dermatophilaceae	g__Dermacoccus	s__Dermacoccus abyssi	GCF_003515945.1	95	d__Bacteria;p__Actinobacteriota;c__Actinomycetia;o__Actinomycetales;f__Dermatophilaceae;g__Dermacoccus;s__Dermacoccus abyssi	97.67	0.95	GCF_003515945.1	95	d__Bacteria;p__Actinobacteriota;c__Actinomycetia;o__Actinomycetales;f__Dermatophilaceae;g__Dermacoccus;s__Dermacoccus abyssi	97.67	0.95	d__Bacteria;p__Actinobacteriota;c__Actinomycetia;o__Actinomycetales;f__Dermatophilaceae;g__Dermacoccus;s__	taxonomic classification defined by topology and ANI	topological placement and ANI have congruent species assignments	GCF_900447535.1, s__Dermacoccus nishinomiyaensis, 95.0, 84.84, 0.83	38.93	11	N/A	N/A	SL310974	Subway	Mong Kok East	22.3226	114.172	Aboveground	Subway air	Air	Air	NA	NA	NA	07/07 2017	Indoor	NA	NA	NA	NA
SL310974_bin.6	76.849	2.47475	0.690362	2829755	478	6951	d__Bacteria	Proteobacteria	Alphaproteobacteria	o__Rhodobacterales	f__Rhodobacteraceae	g__Paracoccus	s__Paracoccus salipaludis	GCF_002287065.1	95	d__Bacteria;p__Proteobacteria;c__Alphaproteobacteria;o__Rhodobacterales;f__Rhodobacteraceae;g__Paracoccus;s__Paracoccus salipaludis	98.96	0.91	GCF_002287065.1	95	d__Bacteria;p__Proteobacteria;c__Alphaproteobacteria;o__Rhodobacterales;f__Rhodobacteraceae;g__Paracoccus;s__Paracoccus salipaludis	98.96	0.91	d__Bacteria;p__Proteobacteria;c__Alphaproteobacteria;o__Rhodobacterales;f__Rhodobacteraceae;g__Paracoccus;s__	taxonomic classification defined by topology and ANI	topological placement and ANI have congruent species assignments	GCF_900102885.1, s__Paracoccus chinensis, 95.0, 91.13, 0.82; GCF_014164625.1, s__Paracoccus sp014164625, 95.0, 87.25, 0.74; GCF_000763805.1, s__Paracoccus sphaerophysae, 95.0, 83.66, 0.66; GCF_900142875.1, s__Paracoccus solventivorans, 95.0, 83.65, 0.65; GCF_004522155.1, s__Paracoccus luteus, 95.0, 83.6, 0.66; GCF_900106665.1, s__Paracoccus sanguinis, 95.0, 83.55, 0.69; GCF_003286075.1, s__Paraco…	61.09	11	N/A	N/A	SL310974	Subway	Mong Kok East	22.3226	114.172	Aboveground	Subway air	Air	Air	NA	NA	NA	07/07 2017	Indoor	NA	NA	NA	NA
SL310975_bin.1	73.9351	3.55632	0.737785	1882785	655	3012	d__Bacteria	Actinobacteriota	Actinomycetia	o__Actinomycetales	f__Micrococcaceae	g__Micrococcus	s__Micrococcus luteus	GCF_000023205.1	95	d__Bacteria;p__Actinobacteriota;c__Actinomycetia;o__Actinomycetales;f__Micrococcaceae;g__Micrococcus;s__Micrococcus luteus	97.31	0.93	GCF_000023205.1	95	d__Bacteria;p__Actinobacteriota;c__Actinomycetia;o__Actinomycetales;f__Micrococcaceae;g__Micrococcus;s__Micrococcus luteus	97.31	0.93	d__Bacteria;p__Actinobacteriota;c__Actinomycetia;o__Actinomycetales;f__Micrococcaceae;g__Micrococcus;s__	taxonomic classification defined by topology and ANI	topological placement and ANI have congruent species assignments	GCF_014205115.1, s__Micrococcus endophyticus, 95.0, 89.3, 0.93; GCF_014204815.1, s__Micrococcus flavus, 95.0, 83.95, 0.88; GCF_001570885.1, s__Micrococcus lylae, 95.0, 82.66, 0.79; GCF_014205175.1, s__Micrococcus cohnii, 95.0, 81.05, 0.67	59.62	11	N/A	N/A	SL310975	Subway	Kowloon Tong	22.3372	114.176	Aboveground	Subway air	Air	Air	NA	NA	NA	11/07 2017	Outdoor	NA	NA	NA	NA
SL310975_bin.2	81.0004	8.79076	0.703919	2495301	622	4628	d__Bacteria	Proteobacteria	Alphaproteobacteria	o__Rhodobacterales	f__Rhodobacteraceae	g__Paracoccus	s__Paracoccus marinus	GCF_007018965.1	95	d__Bacteria;p__Proteobacteria;c__Alphaproteobacteria;o__Rhodobacterales;f__Rhodobacteraceae;g__Paracoccus;s__Paracoccus marinus	96.83	0.96	GCF_007018965.1	95	d__Bacteria;p__Proteobacteria;c__Alphaproteobacteria;o__Rhodobacterales;f__Rhodobacteraceae;g__Paracoccus;s__Paracoccus marinus	96.83	0.96	d__Bacteria;p__Proteobacteria;c__Alphaproteobacteria;o__Rhodobacterales;f__Rhodobacteraceae;g__Paracoccus;s__	taxonomic classification defined by topology and ANI	topological placement and ANI have congruent species assignments	GCF_004923205.2, s__Paracoccus aeridis, 95.0, 87.73, 0.87; GCF_002287065.1, s__Paracoccus salipaludis, 95.0, 82.31, 0.69; GCF_900102885.1, s__Paracoccus chinensis, 95.0, 81.87, 0.68; GCF_004522155.1, s__Paracoccus luteus, 95.0, 81.76, 0.74; GCF_000763805.1, s__Paracoccus sphaerophysae, 95.0, 81.66, 0.68; GCF_003286075.1, s__Paracoccus endophyticus, 95.0, 81.55, 0.69; GCF_014164625.1, s__Paracoccu…	60.89	11	N/A	N/A	SL310975	Subway	Kowloon Tong	22.3372	114.176	Aboveground	Subway air	Air	Air	NA	NA	NA	11/07 2017	Outdoor	NA	NA	NA	NA
SL310975_bin.3	75.5884	6.41414	0.697084	2569207	566	5250	d__Bacteria	Proteobacteria	Alphaproteobacteria	o__Rhodobacterales	f__Rhodobacteraceae	g__Paracoccus	s__Paracoccus salipaludis	GCF_002287065.1	95	d__Bacteria;p__Proteobacteria;c__Alphaproteobacteria;o__Rhodobacterales;f__Rhodobacteraceae;g__Paracoccus;s__Paracoccus salipaludis	98.35	0.96	GCF_002287065.1	95	d__Bacteria;p__Proteobacteria;c__Alphaproteobacteria;o__Rhodobacterales;f__Rhodobacteraceae;g__Paracoccus;s__Paracoccus salipaludis	98.35	0.96	d__Bacteria;p__Proteobacteria;c__Alphaproteobacteria;o__Rhodobacterales;f__Rhodobacteraceae;g__Paracoccus;s__	taxonomic classification defined by topology and ANI	topological placement and ANI have congruent species assignments	GCF_900102885.1, s__Paracoccus chinensis, 95.0, 91.11, 0.85; GCF_014164625.1, s__Paracoccus sp014164625, 95.0, 86.99, 0.79; GCF_900142875.1, s__Paracoccus solventivorans, 95.0, 83.29, 0.72; GCF_000763805.1, s__Paracoccus sphaerophysae, 95.0, 83.1, 0.71; GCF_004522155.1, s__Paracoccus luteus, 95.0, 82.99, 0.72; GCF_003286075.1, s__Paracoccus endophyticus, 95.0, 82.95, 0.72; GCF_900106665.1, s__Par…	51.76	11	N/A	N/A	SL310975	Subway	Kowloon Tong	22.3372	114.176	Aboveground	Subway air	Air	Air	NA	NA	NA	11/07 2017	Outdoor	NA	NA	NA	NA
SL310976_bin.1	55.4859	1.72414	0.699917	2213603	398	6482	d__Bacteria	Proteobacteria	Alphaproteobacteria	o__Rhodobacterales	f__Rhodobacteraceae	g__Paracoccus	s__Paracoccus salipaludis	GCF_002287065.1	95	d__Bacteria;p__Proteobacteria;c__Alphaproteobacteria;o__Rhodobacterales;f__Rhodobacteraceae;g__Paracoccus;s__Paracoccus salipaludis	98.86	0.96	GCF_002287065.1	95	d__Bacteria;p__Proteobacteria;c__Alphaproteobacteria;o__Rhodobacterales;f__Rhodobacteraceae;g__Paracoccus;s__Paracoccus salipaludis	98.86	0.96	d__Bacteria;p__Proteobacteria;c__Alphaproteobacteria;o__Rhodobacterales;f__Rhodobacteraceae;g__Paracoccus;s__	taxonomic classification defined by topology and ANI	topological placement and ANI have congruent species assignments	GCF_900102885.1, s__Paracoccus chinensis, 95.0, 91.17, 0.87; GCF_014164625.1, s__Paracoccus sp014164625, 95.0, 87.2, 0.79; GCF_900142875.1, s__Paracoccus solventivorans, 95.0, 83.46, 0.71; GCF_000763805.1, s__Paracoccus sphaerophysae, 95.0, 83.23, 0.71; GCF_900106665.1, s__Paracoccus sanguinis, 95.0, 82.91, 0.74; GCF_004522155.1, s__Paracoccus luteus, 95.0, 82.84, 0.72; GCF_003286075.1, s__Paraco…	45.72	11	N/A	N/A	SL310976	Subway	Tai Wai	22.373	114.179	Aboveground	Subway air	Air	Air	NA	NA	NA	11/07 2017	Outdoor	NA	NA	NA	NA
SL310976_bin.2	54.3436	9.28057	0.693444	1942426	1298	1482	d__Bacteria	Actinobacteriota	Actinomycetia	o__Actinomycetales	f__Dermatophilaceae	g__Dermacoccus	s__	N/A	N/A	N/A	N/A	N/A	GCF_900447535.1	95	d__Bacteria;p__Actinobacteriota;c__Actinomycetia;o__Actinomycetales;f__Dermatophilaceae;g__Dermacoccus;s__Dermacoccus nishinomiyaensis	93.55	0.93	d__Bacteria;p__Actinobacteriota;c__Actinomycetia;o__Actinomycetales;f__Dermatophilaceae;g__Dermacoccus;s__	taxonomic classification defined by topology and ANI	N/A	GCF_003515945.1, s__Dermacoccus abyssi, 95.0, 93.13, 0.89	32.32	11	0.972009	Genome not assigned to closest species as it falls outside its pre-defined ANI radius	SL310976	Subway	Tai Wai	22.373	114.179	Aboveground	Subway air	Air	Air	NA	NA	NA	11/07 2017	Outdoor	NA	NA	NA	NA
SL310976_bin.4	81.4655	7.87037	0.439907	2165501	1120	2039	d__Bacteria	Proteobacteria	Gammaproteobacteria	o__Pseudomonadales	f__Moraxellaceae	g__Moraxella_A	s__Moraxella_A cinereus	GCA_014647715.1	95	d__Bacteria;p__Proteobacteria;c__Gammaproteobacteria;o__Pseudomonadales;f__Moraxellaceae;g__Moraxella_A;s__Moraxella_A cinereus	96.55	0.92	N/A	N/A	N/A	N/A	N/A	d__Bacteria;p__Proteobacteria;c__Gammaproteobacteria;o__Pseudomonadales;f__Moraxellaceae;g__Moraxella_A;s__	ANI	topological placement and ANI have incongruent species assignments	GCA_014647715.1, s__Moraxella_A cinereus, 95.0, 96.55, 0.92; GCF_001553955.1, s__Moraxella_A osloensis, 95.0237, 95.63, 0.89; GCF_009867135.1, s__Moraxella_A sp002478835, 95.0237, 95.26, 0.87; GCF_001591265.1, s__Moraxella_A atlantae, 95.0, 80.05, 0.27; GCF_000379845.1, s__Moraxella_A boevrei, 95.0, 79.04, 0.22; GCF_000320365.1, s__Moraxella_A macacae, 95.0, 78.7, 0.17	66.87	11	N/A	N/A	SL310976	Subway	Tai Wai	22.373	114.179	Aboveground	Subway air	Air	Air	NA	NA	NA	11/07 2017	Outdoor	NA	NA	NA	NA
SL310976_bin.6	76.916	4.30428	0.737722	1791068	506	4002	d__Bacteria	Actinobacteriota	Actinomycetia	o__Actinomycetales	f__Micrococcaceae	g__Micrococcus	s__Micrococcus luteus	GCF_000023205.1	95	d__Bacteria;p__Actinobacteriota;c__Actinomycetia;o__Actinomycetales;f__Micrococcaceae;g__Micrococcus;s__Micrococcus luteus	97.07	0.96	GCF_000023205.1	95	d__Bacteria;p__Actinobacteriota;c__Actinomycetia;o__Actinomycetales;f__Micrococcaceae;g__Micrococcus;s__Micrococcus luteus	97.07	0.96	d__Bacteria;p__Actinobacteriota;c__Actinomycetia;o__Actinomycetales;f__Micrococcaceae;g__Micrococcus;s__	taxonomic classification defined by topology and ANI	topological placement and ANI have congruent species assignments	GCF_014205115.1, s__Micrococcus endophyticus, 95.0, 88.6, 0.93; GCF_014204815.1, s__Micrococcus flavus, 95.0, 84.2, 0.88; GCF_001570885.1, s__Micrococcus lylae, 95.0, 82.38, 0.8; GCF_014205175.1, s__Micrococcus cohnii, 95.0, 80.93, 0.68	62.76	11	N/A	N/A	SL310976	Subway	Tai Wai	22.373	114.179	Aboveground	Subway air	Air	Air	NA	NA	NA	11/07 2017	Outdoor	NA	NA	NA	NA
SL310977_bin.1	50.9698	8.5169	0.700161	1845454	819	2221	d__Bacteria	Proteobacteria	Alphaproteobacteria	o__Rhodobacterales	f__Rhodobacteraceae	g__Paracoccus	s__Paracoccus marinus	GCF_007018965.1	95	d__Bacteria;p__Proteobacteria;c__Alphaproteobacteria;o__Rhodobacterales;f__Rhodobacteraceae;g__Paracoccus;s__Paracoccus marinus	96.04	0.9	GCF_007018965.1	95	d__Bacteria;p__Proteobacteria;c__Alphaproteobacteria;o__Rhodobacterales;f__Rhodobacteraceae;g__Paracoccus;s__Paracoccus marinus	96.04	0.9	d__Bacteria;p__Proteobacteria;c__Alphaproteobacteria;o__Rhodobacterales;f__Rhodobacteraceae;g__Paracoccus;s__	taxonomic classification defined by topology and ANI	topological placement and ANI have congruent species assignments	GCF_004923205.2, s__Paracoccus aeridis, 95.0, 86.3, 0.85; GCF_002287065.1, s__Paracoccus salipaludis, 95.0, 84.08, 0.75; GCF_900102885.1, s__Paracoccus chinensis, 95.0, 82.08, 0.72; GCF_000763805.1, s__Paracoccus sphaerophysae, 95.0, 81.76, 0.61; GCF_004522155.1, s__Paracoccus luteus, 95.0, 81.69, 0.75; GCF_900106665.1, s__Paracoccus sanguinis, 95.0, 81.62, 0.7; GCF_002105555.1, s__Paracoccus con…	30.16	11	N/A	Genome has more than 12.5% of markers with multiple hits	SL310977	Subway	Che Kung Temple	22.3748	114.186	Aboveground	Subway air	Air	Air	NA	NA	NA	11/07 2017	Outdoor	NA	NA	NA	NA
SL310978_bin.1	90.5139	3.57034	0.737425	2197884	519	5279	d__Bacteria	Actinobacteriota	Actinomycetia	o__Actinomycetales	f__Micrococcaceae	g__Micrococcus	s__Micrococcus luteus	GCF_000023205.1	95	d__Bacteria;p__Actinobacteriota;c__Actinomycetia;o__Actinomycetales;f__Micrococcaceae;g__Micrococcus;s__Micrococcus luteus	97.28	0.93	GCF_000023205.1	95	d__Bacteria;p__Actinobacteriota;c__Actinomycetia;o__Actinomycetales;f__Micrococcaceae;g__Micrococcus;s__Micrococcus luteus	97.28	0.93	d__Bacteria;p__Actinobacteriota;c__Actinomycetia;o__Actinomycetales;f__Micrococcaceae;g__Micrococcus;s__	taxonomic classification defined by topology and ANI	topological placement and ANI have congruent species assignments	GCF_014205115.1, s__Micrococcus endophyticus, 95.0, 89.46, 0.92; GCF_014204815.1, s__Micrococcus flavus, 95.0, 84.85, 0.86; GCF_001570885.1, s__Micrococcus lylae, 95.0, 83.22, 0.77; GCF_014205175.1, s__Micrococcus cohnii, 95.0, 81.51, 0.66	84.77	11	N/A	N/A	SL310978	Subway	Sha Tin Wai	22.3769	114.195	Aboveground	Subway air	Air	Air	NA	NA	NA	11/07 2017	Outdoor	NA	NA	NA	NA
SL310978_bin.2	56.3578	2.09132	0.441811	1168347	461	2596	d__Bacteria	Proteobacteria	Gammaproteobacteria	o__Pseudomonadales	f__Moraxellaceae	g__Moraxella_A	s__Moraxella_A cinereus	GCA_014647715.1	95	d__Bacteria;p__Proteobacteria;c__Gammaproteobacteria;o__Pseudomonadales;f__Moraxellaceae;g__Moraxella_A;s__Moraxella_A cinereus	96.67	0.99	N/A	N/A	N/A	N/A	N/A	d__Bacteria;p__Proteobacteria;c__Gammaproteobacteria;o__Pseudomonadales;f__Moraxellaceae;g__Moraxella_A;s__	ANI	topological placement and ANI have incongruent species assignments	GCA_014647715.1, s__Moraxella_A cinereus, 95.0, 96.67, 0.99; GCF_001553955.1, s__Moraxella_A osloensis, 95.0237, 96.22, 0.97; GCF_009867135.1, s__Moraxella_A sp002478835, 95.0237, 95.63, 0.93; GCF_001591265.1, s__Moraxella_A atlantae, 95.0, 79.19, 0.29; GCF_000379845.1, s__Moraxella_A boevrei, 95.0, 79.08, 0.25; GCF_000320365.1, s__Moraxella_A macacae, 95.0, 78.28, 0.23	53.01	11	N/A	N/A	SL310978	Subway	Sha Tin Wai	22.3769	114.195	Aboveground	Subway air	Air	Air	NA	NA	NA	11/07 2017	Outdoor	NA	NA	NA	NA
SL310978_bin.3	60.1999	1.99495	0.692819	2013926	434	6058	d__Bacteria	Proteobacteria	Alphaproteobacteria	o__Rhodobacterales	f__Rhodobacteraceae	g__Paracoccus	s__Paracoccus salipaludis	GCF_002287065.1	95	d__Bacteria;p__Proteobacteria;c__Alphaproteobacteria;o__Rhodobacterales;f__Rhodobacteraceae;g__Paracoccus;s__Paracoccus salipaludis	98.97	0.97	GCF_002287065.1	95	d__Bacteria;p__Proteobacteria;c__Alphaproteobacteria;o__Rhodobacterales;f__Rhodobacteraceae;g__Paracoccus;s__Paracoccus salipaludis	98.97	0.97	d__Bacteria;p__Proteobacteria;c__Alphaproteobacteria;o__Rhodobacterales;f__Rhodobacteraceae;g__Paracoccus;s__	taxonomic classification defined by topology and ANI	topological placement and ANI have congruent species assignments	GCF_900102885.1, s__Paracoccus chinensis, 95.0, 91.48, 0.88; GCF_014164625.1, s__Paracoccus sp014164625, 95.0, 87.42, 0.81; GCF_900142875.1, s__Paracoccus solventivorans, 95.0, 84.02, 0.71; GCF_000763805.1, s__Paracoccus sphaerophysae, 95.0, 83.47, 0.75; GCF_900106665.1, s__Paracoccus sanguinis, 95.0, 83.32, 0.77; GCF_003286075.1, s__Paracoccus endophyticus, 95.0, 83.27, 0.74; GCF_004522155.1, s_…	45.38	11	N/A	N/A	SL310978	Subway	Sha Tin Wai	22.3769	114.195	Aboveground	Subway air	Air	Air	NA	NA	NA	11/07 2017	Outdoor	NA	NA	NA	NA
SL310979_bin.1	56.5361	3.44828	0.43978	1169066	448	2631	d__Bacteria	Proteobacteria	Gammaproteobacteria	o__Pseudomonadales	f__Moraxellaceae	g__Moraxella_A	s__Moraxella_A cinereus	GCA_014647715.1	95	d__Bacteria;p__Proteobacteria;c__Gammaproteobacteria;o__Pseudomonadales;f__Moraxellaceae;g__Moraxella_A;s__Moraxella_A cinereus	96.14	0.95	N/A	N/A	N/A	N/A	N/A	d__Bacteria;p__Proteobacteria;c__Gammaproteobacteria;o__Pseudomonadales;f__Moraxellaceae;g__Moraxella_A;s__	ANI	topological placement and ANI have incongruent species assignments	GCA_014647715.1, s__Moraxella_A cinereus, 95.0, 96.14, 0.95; GCF_001553955.1, s__Moraxella_A osloensis, 95.0237, 95.55, 0.9; GCF_009867135.1, s__Moraxella_A sp002478835, 95.0237, 94.7, 0.89; GCF_001591265.1, s__Moraxella_A atlantae, 95.0, 79.45, 0.24; GCF_000379845.1, s__Moraxella_A boevrei, 95.0, 76.86, 0.21; GCF_000320365.1, s__Moraxella_A macacae, 95.0, 75.61, 0.13	36.43	11	N/A	N/A	SL310979	Subway	Shek Kip Mei	22.332	114.169	Underground	Subway air	Air	Air	NA	NA	NA	11/07 2017	Indoor	NA	NA	NA	NA
SL310979_bin.3	57.5235	1.72414	0.708592	1721946	436	4721	d__Bacteria	Proteobacteria	Alphaproteobacteria	o__Rhodobacterales	f__Rhodobacteraceae	g__Paracoccus	s__Paracoccus marinus	GCF_007018965.1	95	d__Bacteria;p__Proteobacteria;c__Alphaproteobacteria;o__Rhodobacterales;f__Rhodobacteraceae;g__Paracoccus;s__Paracoccus marinus	96.59	0.97	GCF_007018965.1	95	d__Bacteria;p__Proteobacteria;c__Alphaproteobacteria;o__Rhodobacterales;f__Rhodobacteraceae;g__Paracoccus;s__Paracoccus marinus	96.59	0.97	d__Bacteria;p__Proteobacteria;c__Alphaproteobacteria;o__Rhodobacterales;f__Rhodobacteraceae;g__Paracoccus;s__	taxonomic classification defined by topology and ANI	topological placement and ANI have congruent species assignments	GCF_004923205.2, s__Paracoccus aeridis, 95.0, 87.48, 0.89; GCF_002287065.1, s__Paracoccus salipaludis, 95.0, 82.05, 0.72; GCF_004522155.1, s__Paracoccus luteus, 95.0, 81.47, 0.74; GCF_900102885.1, s__Paracoccus chinensis, 95.0, 81.24, 0.71; GCF_000763805.1, s__Paracoccus sphaerophysae, 95.0, 81.2, 0.72; GCF_003286075.1, s__Paracoccus endophyticus, 95.0, 81.08, 0.73; GCF_900106665.1, s__Paracoccus…	47.33	11	N/A	N/A	SL310979	Subway	Shek Kip Mei	22.332	114.169	Underground	Subway air	Air	Air	NA	NA	NA	11/07 2017	Indoor	NA	NA	NA	NA
SL310979_bin.4	79.4561	5.82751	0.737928	1966190	611	3633	d__Bacteria	Actinobacteriota	Actinomycetia	o__Actinomycetales	f__Micrococcaceae	g__Micrococcus	s__Micrococcus luteus	GCF_000023205.1	95	d__Bacteria;p__Actinobacteriota;c__Actinomycetia;o__Actinomycetales;f__Micrococcaceae;g__Micrococcus;s__Micrococcus luteus	97.06	0.95	GCF_000023205.1	95	d__Bacteria;p__Actinobacteriota;c__Actinomycetia;o__Actinomycetales;f__Micrococcaceae;g__Micrococcus;s__Micrococcus luteus	97.06	0.95	d__Bacteria;p__Actinobacteriota;c__Actinomycetia;o__Actinomycetales;f__Micrococcaceae;g__Micrococcus;s__	taxonomic classification defined by topology and ANI	topological placement and ANI have congruent species assignments	GCF_014205115.1, s__Micrococcus endophyticus, 95.0, 89.13, 0.93; GCF_014204815.1, s__Micrococcus flavus, 95.0, 84.57, 0.88; GCF_001570885.1, s__Micrococcus lylae, 95.0, 83.43, 0.77; GCF_014205175.1, s__Micrococcus cohnii, 95.0, 81.23, 0.67	80.37	11	N/A	N/A	SL310979	Subway	Shek Kip Mei	22.332	114.169	Underground	Subway air	Air	Air	NA	NA	NA	11/07 2017	Indoor	NA	NA	NA	NA
SL310980_bin.1	84.4343	4.34087	0.7357	2185184	642	3776	d__Bacteria	Actinobacteriota	Actinomycetia	o__Actinomycetales	f__Micrococcaceae	g__Micrococcus	s__Micrococcus luteus	GCF_000023205.1	95	d__Bacteria;p__Actinobacteriota;c__Actinomycetia;o__Actinomycetales;f__Micrococcaceae;g__Micrococcus;s__Micrococcus luteus	97.11	0.89	GCF_000023205.1	95	d__Bacteria;p__Actinobacteriota;c__Actinomycetia;o__Actinomycetales;f__Micrococcaceae;g__Micrococcus;s__Micrococcus luteus	97.11	0.89	d__Bacteria;p__Actinobacteriota;c__Actinomycetia;o__Actinomycetales;f__Micrococcaceae;g__Micrococcus;s__	taxonomic classification defined by topology and ANI	topological placement and ANI have congruent species assignments	GCF_014205115.1, s__Micrococcus endophyticus, 95.0, 89.36, 0.87; GCF_014204815.1, s__Micrococcus flavus, 95.0, 84.87, 0.85; GCF_001570885.1, s__Micrococcus lylae, 95.0, 82.85, 0.74; GCF_014205175.1, s__Micrococcus cohnii, 95.0, 81.7, 0.66	77.37	11	N/A	N/A	SL310980	Subway	Prince Edward	22.3251	114.168	Underground	Subway air	Air	Air	NA	NA	NA	11/07 2017	Indoor	NA	NA	NA	NA
SL310980_bin.2	67.6086	1.2931	0.442493	1404044	534	2712	d__Bacteria	Proteobacteria	Gammaproteobacteria	o__Pseudomonadales	f__Moraxellaceae	g__Moraxella_A	s__Moraxella_A cinereus	GCA_014647715.1	95	d__Bacteria;p__Proteobacteria;c__Gammaproteobacteria;o__Pseudomonadales;f__Moraxellaceae;g__Moraxella_A;s__Moraxella_A cinereus	96.47	0.95	N/A	N/A	N/A	N/A	N/A	d__Bacteria;p__Proteobacteria;c__Gammaproteobacteria;o__Pseudomonadales;f__Moraxellaceae;g__Moraxella_A;s__	ANI	topological placement and ANI have incongruent species assignments	GCA_014647715.1, s__Moraxella_A cinereus, 95.0, 96.47, 0.95; GCF_001553955.1, s__Moraxella_A osloensis, 95.0237, 95.96, 0.92; GCF_009867135.1, s__Moraxella_A sp002478835, 95.0237, 95.47, 0.88; GCF_001591265.1, s__Moraxella_A atlantae, 95.0, 79.46, 0.27; GCF_000320365.1, s__Moraxella_A macacae, 95.0, 78.71, 0.22; GCF_000379845.1, s__Moraxella_A boevrei, 95.0, 78.57, 0.29	63.89	11	N/A	N/A	SL310980	Subway	Prince Edward	22.3251	114.168	Underground	Subway air	Air	Air	NA	NA	NA	11/07 2017	Indoor	NA	NA	NA	NA
SL310981_bin.1	50.1567	1.72414	0.441392	1238643	479	2591	d__Bacteria	Proteobacteria	Gammaproteobacteria	o__Pseudomonadales	f__Moraxellaceae	g__Moraxella_A	s__Moraxella_A cinereus	GCA_014647715.1	95	d__Bacteria;p__Proteobacteria;c__Gammaproteobacteria;o__Pseudomonadales;f__Moraxellaceae;g__Moraxella_A;s__Moraxella_A cinereus	96.23	0.95	N/A	N/A	N/A	N/A	N/A	d__Bacteria;p__Proteobacteria;c__Gammaproteobacteria;o__Pseudomonadales;f__Moraxellaceae;g__Moraxella_A;s__	ANI	topological placement and ANI have incongruent species assignments	GCA_014647715.1, s__Moraxella_A cinereus, 95.0, 96.23, 0.95; GCF_009867135.1, s__Moraxella_A sp002478835, 95.0237, 95.75, 0.91; GCF_001553955.1, s__Moraxella_A osloensis, 95.0237, 95.59, 0.94; GCF_000379845.1, s__Moraxella_A boevrei, 95.0, 77.22, 0.23; GCF_000320365.1, s__Moraxella_A macacae, 95.0, 77.12, 0.17; GCF_001591265.1, s__Moraxella_A atlantae, 95.0, 76.58, 0.24	41.41	11	N/A	N/A	SL310981	Subway	Sham Shui Po	22.3313	114.162	Underground	Subway air	Air	Air	NA	NA	NA	11/07 2017	Indoor	NA	NA	NA	NA
SL310981_bin.2	50.4276	5.06736	0.694405	1980027	1180	1697	d__Bacteria	Actinobacteriota	Actinomycetia	o__Actinomycetales	f__Micrococcaceae	g__Kocuria	s__Kocuria marina	GCA_014652975.1	95.811	d__Bacteria;p__Actinobacteriota;c__Actinomycetia;o__Actinomycetales;f__Micrococcaceae;g__Kocuria;s__Kocuria marina	97.84	0.73	GCA_014652975.1	95.811	d__Bacteria;p__Actinobacteriota;c__Actinomycetia;o__Actinomycetales;f__Micrococcaceae;g__Kocuria;s__Kocuria marina	97.84	0.73	d__Bacteria;p__Actinobacteriota;c__Actinomycetia;o__Actinomycetales;f__Micrococcaceae;g__Kocuria;s__	taxonomic classification defined by topology and ANI	topological placement and ANI have congruent species assignments	GCF_000786655.1, s__Kocuria marina_A, 95.811, 95.66, 0.75; GCF_000010285.1, s__Kocuria rhizophila_A, 95.0, 84.53, 0.63; GCF_007681555.1, s__Kocuria salsicia, 95.0, 84.12, 0.7; GCF_003226895.2, s__Kocuria sp003226895, 95.0, 83.78, 0.68; GCF_006539885.1, s__Kocuria varians, 95.0, 83.53, 0.66; GCF_003667225.1, s__Kocuria rhizophila, 95.0, 83.02, 0.66; GCF_003687455.1, s__Kocuria tytonicola, 95.0, 82…	35.93	11	N/A	N/A	SL310981	Subway	Sham Shui Po	22.3313	114.162	Underground	Subway air	Air	Air	NA	NA	NA	11/07 2017	Indoor	NA	NA	NA	NA
SL310982_bin.1	84.2144	4.02268	0.736891	2112787	593	4077	d__Bacteria	Actinobacteriota	Actinomycetia	o__Actinomycetales	f__Micrococcaceae	g__Micrococcus	s__Micrococcus luteus	GCF_000023205.1	95	d__Bacteria;p__Actinobacteriota;c__Actinomycetia;o__Actinomycetales;f__Micrococcaceae;g__Micrococcus;s__Micrococcus luteus	97.28	0.91	GCF_000023205.1	95	d__Bacteria;p__Actinobacteriota;c__Actinomycetia;o__Actinomycetales;f__Micrococcaceae;g__Micrococcus;s__Micrococcus luteus	97.28	0.91	d__Bacteria;p__Actinobacteriota;c__Actinomycetia;o__Actinomycetales;f__Micrococcaceae;g__Micrococcus;s__	taxonomic classification defined by topology and ANI	topological placement and ANI have congruent species assignments	GCF_014205115.1, s__Micrococcus endophyticus, 95.0, 89.06, 0.89; GCF_014204815.1, s__Micrococcus flavus, 95.0, 84.68, 0.84; GCF_001570885.1, s__Micrococcus lylae, 95.0, 83.19, 0.75; GCF_014205175.1, s__Micrococcus cohnii, 95.0, 81.37, 0.66	83.4	11	N/A	N/A	SL310982	Subway	Cheung Sha Wan	22.3358	114.156	Underground	Subway air	Air	Air	NA	NA	NA	11/07 2017	Indoor	NA	NA	NA	NA
SL310982_bin.3	78.8913	4.1986	0.441663	1890359	1037	1870	d__Bacteria	Proteobacteria	Gammaproteobacteria	o__Pseudomonadales	f__Moraxellaceae	g__Moraxella_A	s__Moraxella_A cinereus	GCA_014647715.1	95	d__Bacteria;p__Proteobacteria;c__Gammaproteobacteria;o__Pseudomonadales;f__Moraxellaceae;g__Moraxella_A;s__Moraxella_A cinereus	96.73	0.97	N/A	N/A	N/A	N/A	N/A	d__Bacteria;p__Proteobacteria;c__Gammaproteobacteria;o__Pseudomonadales;f__Moraxellaceae;g__Moraxella_A;s__	ANI	topological placement and ANI have incongruent species assignments	GCA_014647715.1, s__Moraxella_A cinereus, 95.0, 96.73, 0.97; GCF_001553955.1, s__Moraxella_A osloensis, 95.0237, 95.77, 0.95; GCF_009867135.1, s__Moraxella_A sp002478835, 95.0237, 95.49, 0.91; GCF_001591265.1, s__Moraxella_A atlantae, 95.0, 82.24, 0.26; GCF_000320365.1, s__Moraxella_A macacae, 95.0, 79.07, 0.19; GCF_000379845.1, s__Moraxella_A boevrei, 95.0, 78.95, 0.28	65.54	11	N/A	N/A	SL310982	Subway	Cheung Sha Wan	22.3358	114.156	Underground	Subway air	Air	Air	NA	NA	NA	11/07 2017	Indoor	NA	NA	NA	NA
SL310983_bin.1	64.5434	0.893997	0.442845	1328759	499	2685	d__Bacteria	Proteobacteria	Gammaproteobacteria	o__Pseudomonadales	f__Moraxellaceae	g__Moraxella_A	s__Moraxella_A cinereus	GCA_014647715.1	95	d__Bacteria;p__Proteobacteria;c__Gammaproteobacteria;o__Pseudomonadales;f__Moraxellaceae;g__Moraxella_A;s__Moraxella_A cinereus	96.57	0.96	N/A	N/A	N/A	N/A	N/A	d__Bacteria;p__Proteobacteria;c__Gammaproteobacteria;o__Pseudomonadales;f__Moraxellaceae;g__Moraxella_A;s__	ANI	topological placement and ANI have incongruent species assignments	GCA_014647715.1, s__Moraxella_A cinereus, 95.0, 96.57, 0.96; GCF_001553955.1, s__Moraxella_A osloensis, 95.0237, 95.37, 0.94; GCF_009867135.1, s__Moraxella_A sp002478835, 95.0237, 95.17, 0.9; GCF_001591265.1, s__Moraxella_A atlantae, 95.0, 79.28, 0.29; GCF_000379845.1, s__Moraxella_A boevrei, 95.0, 77.54, 0.24; GCF_000320365.1, s__Moraxella_A macacae, 95.0, 76.72, 0.16	50.53	11	N/A	N/A	SL310983	Subway	Lai King	22.3487	114.126	Underground	Subway air	Air	Air	NA	NA	NA	11/07 2017	Indoor	NA	NA	NA	NA
SL310983_bin.2	52.5862	3.44828	0.704651	1931597	470	4978	d__Bacteria	Proteobacteria	Alphaproteobacteria	o__Rhodobacterales	f__Rhodobacteraceae	g__Paracoccus	s__Paracoccus marinus	GCF_007018965.1	95	d__Bacteria;p__Proteobacteria;c__Alphaproteobacteria;o__Rhodobacterales;f__Rhodobacteraceae;g__Paracoccus;s__Paracoccus marinus	97	0.98	GCF_007018965.1	95	d__Bacteria;p__Proteobacteria;c__Alphaproteobacteria;o__Rhodobacterales;f__Rhodobacteraceae;g__Paracoccus;s__Paracoccus marinus	97	0.98	d__Bacteria;p__Proteobacteria;c__Alphaproteobacteria;o__Rhodobacterales;f__Rhodobacteraceae;g__Paracoccus;s__	taxonomic classification defined by topology and ANI	topological placement and ANI have congruent species assignments	GCF_004923205.2, s__Paracoccus aeridis, 95.0, 87.77, 0.91; GCF_004522155.1, s__Paracoccus luteus, 95.0, 81.88, 0.74; GCF_002287065.1, s__Paracoccus salipaludis, 95.0, 81.76, 0.7; GCF_000763805.1, s__Paracoccus sphaerophysae, 95.0, 81.47, 0.68; GCF_003286075.1, s__Paracoccus endophyticus, 95.0, 81.31, 0.72; GCF_900102885.1, s__Paracoccus chinensis, 95.0, 81.22, 0.68; GCF_900106665.1, s__Paracoccus…	43.95	11	N/A	N/A	SL310983	Subway	Lai King	22.3487	114.126	Underground	Subway air	Air	Air	NA	NA	NA	11/07 2017	Indoor	NA	NA	NA	NA
[truncated: 753 more rows]

## Sheet: S6
Table S6. Predicted ex-situ hosts of the viral genomes in the built environments.
[truncated: 380 more rows]

## Sheet: S7
Table S7. Predicted in-situ hosts of the viral genomes in the built environments.
[truncated: 1,029 more rows]

[truncated: 4 more sheets: S8, S9, S10, S11]
